# Supplementary material for: Selection and evolution of disulfide-rich peptides via cellular protein quality control
Source: Chem Sci. 2023 Mar 15;14(13):3668–75. doi: 10.1039/d2sc05343h (PMC10055976; doi:10.1039/d2sc05343h)
Supplement: SC-014-D2SC05343H-s001 [file SC-014-D2SC05343H-s001.xlsx]

## Sheet: Library-1  P4
Number	Sequences																									Abundance
																										Input	P4	Normalization
1	C	P	P	C	L	L	M	S	S	C	N	L	T	Q	Q	C	M	I	I	Y	P	C	P	P	C	1	220	220
2	C	P	P	C	P	L	K	M	H	C	N	Y	F	N	M	C	S	S	I	N	T	C	P	P	C	4	856	214
3	C	P	P	C	N	F	P	L	S	C	R	P	R	L	K	C	Y	S	L	T	S	C	P	P	C	1	198	198
4	C	P	P	C	P	S	S	R	D	C	I	S	D	A	N	C	S	L	V	T	P	C	P	P	C	1	161	161
5	C	P	P	C	R	N	W	A	R	C	*	R	Q	K	R	C	Y	L	V	N	S	C	P	P	C	1	151	151
6	C	P	P	C	R	F	T	L	S	C	P	I	R	A	M	C	N	D	S	V	P	C	P	P	C	12	1800	150
7	C	P	P	C	V	A	F	L	N	C	N	N	T	H	L	C	T	T	L	K	T	C	P	P	C	7	1043	149
8	C	P	P	C	Q	T	V	A	I	C	I	D	K	H	N	C	G	L	V	Y	R	C	P	P	C	1	149	149
9	C	P	P	C	E	N	I	Y	G	C	L	L	S	S	L	C	A	N	V	Q	Y	C	P	P	C	1	140	140
10	C	P	P	C	Y	H	H	F	I	C	Y	I	Y	Y	Y	C	I	N	N	F	F	C	P	P	C	1	136	136
11	C	P	P	C	S	L	V	Q	G	C	S	H	P	I	N	C	L	N	A	T	N	C	P	P	C	3	370	123.333
12	C	P	P	C	I	*	N	F	V	C	Y	I	I	I	F	C	N	I	L	Y	S	C	P	P	C	6	732	122
13	C	P	P	C	F	N	I	S	L	C	S	N	Y	T	N	C	I	S	N	G	N	C	P	P	C	1	118	118
14	C	P	P	C	R	I	L	F	T	C	L	I	D	S	N	C	N	I	L	K	L	C	P	P	C	11	1296	117.818
15	C	P	P	C	A	P	M	W	P	C	S	N	P	S	W	C	Y	Y	I	F	K	C	P	P	C	1	115	115
16	C	P	P	C	*	F	S	V	H	C	Y	T	Y	S	I	C	S	S	L	N	R	C	P	P	C	1	114	114
17	C	P	P	C	I	F	H	E	*	C	L	Y	Q	L	R	C	N	N	L	N	N	C	P	P	C	1	109	109
18	C	P	P	C	Q	W	*	T	R	C	R	L	L	L	R	C	V	L	S	D	R	C	P	P	C	16	1696	106
19	C	P	P	C	G	I	Q	H	W	C	L	S	T	T	S	C	A	L	Y	F	R	C	P	P	C	1	104	104
20	C	P	P	C	G	S	P	T	G	C	I	P	L	S	N	C	M	S	N	Y	T	C	P	P	C	11	1132	102.909
21	C	P	P	C	N	R	Y	Y	G	C	S	L	R	W	W	C	V	N	P	S	R	C	P	P	C	1	102	102
22	C	P	P	C	T	*	L	Q	T	C	I	M	N	I	M	C	W	N	K	Q	D	C	P	P	C	2	203	101.5
23	C	P	P	C	*	A	E	R	L	C	S	R	R	W	S	C	M	G	E	A	S	C	P	P	C	18	1804	100.222
24	C	P	P	C	N	Y	A	I	L	C	Y	F	F	I	S	C	I	F	Y	M	I	C	P	P	C	1	99	99
25	C	P	P	C	P	S	E	L	Y	C	H	H	M	F	L	C	S	H	N	I	I	C	P	P	C	1	99	99
26	C	P	P	C	L	S	P	T	L	C	G	L	R	R	R	C	A	R	S	I	R	C	P	P	C	3	295	98.3333
27	C	P	P	C	H	Y	P	R	E	C	I	F	R	N	P	C	S	I	I	Q	E	C	P	P	C	12	1146	95.5
28	C	P	P	C	W	N	L	S	N	C	*	N	N	H	F	C	L	I	N	F	Y	C	P	P	C	1	95	95
29	C	P	P	C	N	G	A	V	W	C	V	E	T	L	T	C	D	D	G	V	N	C	P	P	C	1	94	94
30	C	P	P	C	K	H	F	M	T	C	T	I	L	Y	V	C	F	I	Y	I	N	C	P	P	C	1	93	93
31	C	P	P	C	L	N	I	S	K	C	Y	F	Y	S	H	C	N	F	I	Y	F	C	P	P	C	5	463	92.6
32	C	P	P	C	V	K	Y	L	N	C	Y	N	I	S	L	C	Y	S	Y	P	N	C	P	P	C	1	92	92
33	C	P	P	C	R	L	T	L	Y	C	P	Y	M	Q	*	C	L	L	*	F	N	C	P	P	C	1	89	89
34	C	P	P	C	L	Y	S	L	G	C	P	E	K	V	N	C	K	Q	*	A	K	C	P	P	C	1	89	89
35	C	P	P	C	Y	F	R	D	S	C	R	I	I	F	W	C	G	F	V	S	*	C	P	P	C	11	971	88.2727
36	C	P	P	C	S	D	H	F	M	C	N	L	S	H	L	C	T	F	T	Y	D	C	P	P	C	10	851	85.1
37	C	P	P	C	V	D	V	L	N	C	N	F	P	S	P	C	R	H	N	P	S	C	P	P	C	1	83	83
38	C	P	P	C	V	I	H	D	S	C	Y	N	Y	I	Y	C	N	I	T	Y	H	C	P	P	C	1	82	82
39	C	P	P	C	W	D	N	N	N	C	Y	Y	R	I	Y	C	F	N	N	I	N	C	P	P	C	4	320	80
40	C	P	P	C	R	R	K	N	S	C	T	P	S	Y	Y	C	D	W	L	T	S	C	P	P	C	1	79	79
41	C	P	P	C	L	E	W	S	I	C	M	Y	F	H	Q	C	L	P	Y	Y	V	C	P	P	C	2	157	78.5
42	C	P	P	C	D	L	L	K	L	C	T	S	I	I	T	C	Y	S	N	H	T	C	P	P	C	15	1162	77.4667
43	C	P	P	C	Q	A	S	V	A	C	*	S	K	S	T	C	N	I	Q	L	K	C	P	P	C	1	76	76
44	C	P	P	C	V	G	F	R	R	C	V	Y	M	T	S	C	I	I	L	R	N	C	P	P	C	12	906	75.5
45	C	P	P	C	S	D	L	G	S	C	I	S	K	R	G	C	V	N	T	T	P	C	P	P	C	1	75	75
46	C	P	P	C	Q	N	H	*	S	C	I	S	S	S	H	C	F	P	F	S	F	C	P	P	C	1	71	71
47	C	P	P	C	P	T	Q	D	I	C	L	S	P	N	V	C	I	T	F	M	A	C	P	P	C	146	10320	70.6849
48	C	P	P	C	L	H	L	T	Y	C	K	S	F	Y	R	C	N	S	S	P	I	C	P	P	C	1	70	70
49	C	P	P	C	L	A	P	V	T	C	V	I	S	P	R	C	N	W	W	H	H	C	P	P	C	3	208	69.3333
50	C	P	P	C	A	R	L	E	L	C	N	S	M	S	G	C	F	D	*	L	P	C	P	P	C	2	138	69
51	C	P	P	C	F	H	F	*	F	C	H	F	I	F	F	C	F	I	F	Y	N	C	P	P	C	1	69	69
52	C	P	P	C	L	L	E	N	N	C	S	L	I	F	Q	C	N	F	I	P	N	C	P	P	C	2	137	68.5
53	C	P	P	C	L	T	M	A	Q	C	T	A	F	H	*	C	R	F	H	L	Q	C	P	P	C	3	205	68.3333
54	C	P	P	C	V	M	L	E	R	C	Y	S	S	T	V	C	Y	S	T	D	H	C	P	P	C	3	202	67.3333
55	C	P	P	C	L	P	M	L	P	C	Y	D	T	R	G	C	L	F	S	D	S	C	P	P	C	2	134	67
56	C	P	P	C	R	P	P	R	R	C	Y	M	V	S	Y	C	G	V	T	S	T	C	P	P	C	1	67	67
57	C	P	P	C	S	I	L	G	P	C	H	F	K	L	N	C	T	H	D	L	V	C	P	P	C	14	928	66.2857
58	C	P	P	C	V	Q	T	Y	Y	C	I	I	S	I	N	C	S	S	A	N	F	C	P	P	C	2	132	66
59	C	P	P	C	G	R	S	L	S	C	S	V	H	M	R	C	L	F	L	T	A	C	P	P	C	16	1042	65.125
60	C	P	P	C	L	R	P	W	N	C	P	S	L	P	F	C	L	T	A	N	L	C	P	P	C	2	129	64.5
61	C	P	P	C	V	S	L	D	L	C	N	I	Y	N	L	C	Y	T	L	N	I	C	P	P	C	5	320	64
62	C	P	P	C	M	D	P	E	I	C	N	F	R	T	V	C	F	Y	H	L	N	C	P	P	C	8	501	62.625
63	C	P	P	C	Q	I	V	N	N	C	T	N	L	S	T	C	E	L	P	N	H	C	P	P	C	4	237	59.25
64	C	P	P	C	R	I	P	N	L	C	T	I	T	L	A	C	M	R	L	L	T	C	P	P	C	4	236	59
65	C	P	P	C	S	Q	D	M	L	C	N	F	T	T	D	C	F	I	S	N	H	C	P	P	C	10	586	58.6
66	C	P	P	C	H	I	N	F	S	C	N	I	T	Y	N	C	L	Q	M	D	Y	C	P	P	C	1	58	58
67	C	P	P	C	S	H	Y	N	*	C	Y	I	H	P	Y	C	Y	T	N	H	F	C	P	P	C	12	684	57
68	C	P	P	C	Y	W	S	I	F	C	F	Y	S	Y	W	C	I	F	Y	N	L	C	P	P	C	1	57	57
69	C	P	P	C	L	R	E	Y	L	C	Y	L	F	L	I	C	F	N	V	L	N	C	P	P	C	1	56	56
70	C	P	P	C	T	R	Q	I	D	C	W	K	S	H	M	C	I	R	L	*	Y	C	P	P	C	2	110	55
71	C	P	P	C	P	R	S	L	F	C	R	R	W	P	R	C	P	L	*	P	M	C	P	P	C	1	55	55
72	C	P	P	C	R	V	A	R	N	C	A	S	L	S	Y	C	*	T	T	E	V	C	P	P	C	2	109	54.5
73	C	P	P	C	I	L	N	S	S	C	Y	H	S	T	L	C	Y	N	L	D	D	C	P	P	C	7	373	53.2857
74	C	P	P	C	S	G	L	Q	D	C	S	N	M	L	L	C	I	S	L	S	N	C	P	P	C	3	159	53
75	C	P	P	C	L	N	Y	D	L	C	L	S	Y	N	L	C	S	R	K	N	F	C	P	P	C	15	775	51.6667
76	C	P	P	C	R	M	Y	N	L	C	F	N	L	N	*	C	F	N	L	Y	F	C	P	P	C	4	201	50.25
77	C	P	P	C	I	W	S	I	M	C	Y	D	T	Q	S	C	T	N	S	T	N	C	P	P	C	1	49	49
78	C	P	P	C	N	N	F	K	L	C	G	N	M	L	S	C	S	S	H	F	I	C	P	P	C	4	195	48.75
79	C	P	P	C	*	T	V	S	D	C	S	I	L	Y	F	C	N	R	T	H	I	C	P	P	C	1	48	48
80	C	P	P	C	N	F	Y	Y	F	C	I	Y	F	N	Y	C	N	I	I	N	F	C	P	P	C	1	47	47
81	C	P	P	C	F	Q	I	Y	Y	C	F	I	F	L	Y	C	L	Y	I	F	F	C	P	P	C	1	47	47
82	C	P	P	C	R	L	I	F	G	C	K	A	P	S	T	C	T	*	Y	K	S	C	P	P	C	1	46	46
83	C	P	P	C	I	F	P	N	H	C	S	N	Y	T	V	C	N	N	A	P	L	C	P	P	C	4	182	45.5
84	C	P	P	C	*	V	I	L	I	C	F	S	H	T	L	C	Q	I	I	L	F	C	P	P	C	1	44	44
85	C	P	P	C	S	L	L	F	*	C	S	S	K	H	V	C	D	I	W	L	I	C	P	P	C	2	84	42
86	C	P	P	C	V	P	Y	N	N	C	T	T	S	Y	N	C	T	R	E	T	I	C	P	P	C	1	42	42
87	C	P	P	C	Y	E	L	Q	K	C	I	V	R	A	L	C	N	T	S	Q	Y	C	P	P	C	1	42	42
88	C	P	P	C	L	Y	S	M	F	C	N	H	K	M	S	C	I	Y	F	H	F	C	P	P	C	2	82	41
89	C	P	P	C	R	R	K	K	G	C	H	N	W	N	L	C	R	S	N	T	A	C	P	P	C	1	41	41
90	C	P	P	C	E	N	V	V	R	C	Y	T	S	N	L	C	H	V	Q	N	I	C	P	P	C	2	81	40.5
91	C	P	P	C	I	T	V	W	L	C	K	Y	Y	L	V	C	I	F	L	L	H	C	P	P	C	1	40	40
92	C	P	P	C	L	T	P	M	H	C	*	W	L	R	I	C	*	F	P	S	S	C	P	P	C	1	40	40
93	C	P	P	C	L	Y	F	T	D	C	H	Q	I	S	S	C	D	F	I	F	M	C	P	P	C	1	40	40
94	C	P	P	C	A	L	Y	L	N	C	S	I	H	S	F	C	H	N	L	I	H	C	P	P	C	1	40	40
95	C	P	P	C	V	I	L	L	R	C	H	Q	N	F	N	C	V	Y	N	I	D	C	P	P	C	1	40	40
96	C	P	P	C	F	F	K	K	G	C	H	N	I	S	I	C	S	Y	H	V	S	C	P	P	C	2	79	39.5
97	C	P	P	C	E	K	I	M	E	C	D	P	S	P	H	C	I	S	M	L	H	C	P	P	C	2	78	39
98	C	P	P	C	S	K	Y	W	R	C	I	Y	Q	L	I	C	M	F	G	R	F	C	P	P	C	1	39	39
99	C	P	P	C	I	N	N	L	N	C	*	N	L	F	I	C	S	F	K	N	S	C	P	P	C	1	39	39
100	C	P	P	C	S	L	F	Y	P	C	I	R	R	L	S	C	M	D	Y	L	P	C	P	P	C	4	154	38.5
101	C	P	P	C	E	N	A	M	P	C	L	R	H	I	F	C	N	F	I	L	A	C	P	P	C	5	191	38.2
102	C	P	P	C	R	P	M	D	R	C	I	T	S	S	G	C	H	N	Y	P	S	C	P	P	C	7	267	38.1429
103	C	P	P	C	S	L	S	R	D	C	R	S	S	T	N	C	S	I	I	Y	Q	C	P	P	C	1	38	38
104	C	P	P	C	L	I	N	S	L	C	F	Y	F	H	L	C	F	I	Y	N	I	C	P	P	C	1	38	38
105	C	P	P	C	R	Y	L	D	R	C	L	S	L	I	F	C	K	R	S	I	P	C	P	P	C	3	112	37.3333
106	C	P	P	C	I	M	Q	F	E	C	P	S	V	P	I	C	D	N	V	I	R	C	P	P	C	1	37	37
107	C	P	P	C	L	S	L	T	I	C	S	V	N	N	N	C	Y	F	L	N	M	C	P	P	C	1	37	37
108	C	P	P	C	F	F	S	Y	T	C	N	Y	L	F	N	C	F	S	L	Y	L	C	P	P	C	1	36	36
109	C	P	P	C	K	I	F	*	M	C	T	L	Q	N	I	C	F	S	F	S	S	C	P	P	C	5	179	35.8
110	C	P	P	C	K	H	G	H	N	C	S	N	F	N	V	C	A	W	Q	H	Y	C	P	P	C	2	71	35.5
111	C	P	P	C	L	H	I	M	F	C	D	W	Y	I	W	C	I	I	I	F	L	C	P	P	C	2	70	35
112	C	P	P	C	H	W	M	N	M	C	Y	S	Y	L	S	C	N	F	L	Q	Y	C	P	P	C	1	35	35
113	C	P	P	C	N	W	I	N	G	C	L	L	N	Y	S	C	S	L	L	F	A	C	P	P	C	1	34	34
114	C	P	P	C	T	R	T	L	V	C	D	A	Q	Y	Y	C	N	I	T	L	M	C	P	P	C	1	34	34
115	C	P	P	C	R	G	Y	T	D	C	P	F	H	Y	M	C	V	I	P	Y	H	C	P	P	C	1	34	34
116	C	P	P	C	H	D	L	A	R	C	R	F	Q	L	N	C	S	N	R	M	E	C	P	P	C	1	34	34
117	C	P	P	C	S	V	Y	I	F	C	Y	I	I	L	F	C	I	I	N	I	Y	C	P	P	C	3	101	33.6667
118	C	P	P	C	I	S	L	Q	S	C	L	T	R	T	L	C	K	S	Y	I	D	C	P	P	C	3	100	33.3333
119	C	P	P	C	Y	R	I	I	Y	C	M	S	L	N	I	C	S	L	R	I	*	C	P	P	C	1	33	33
120	C	P	P	C	R	I	D	L	M	C	H	P	R	S	N	C	I	Q	I	P	T	C	P	P	C	2	64	32
121	C	P	P	C	N	M	K	R	T	C	F	N	L	S	A	C	Y	F	T	Q	Y	C	P	P	C	1	32	32
122	C	P	P	C	Y	K	T	I	Q	C	S	P	I	F	M	C	I	Y	T	N	S	C	P	P	C	1	32	32
123	C	P	P	C	L	R	P	S	G	C	F	K	I	R	E	C	I	F	L	L	K	C	P	P	C	1	32	32
124	C	P	P	C	L	S	I	Y	N	C	K	S	L	S	R	C	I	I	M	H	M	C	P	P	C	4	125	31.25
125	C	P	P	C	S	T	S	S	G	C	P	Y	T	S	L	C	V	Y	K	T	T	C	P	P	C	2	60	30
126	C	P	P	C	L	F	Q	N	V	C	S	S	L	I	D	C	I	N	R	R	G	C	P	P	C	1	30	30
127	C	P	P	C	I	I	F	*	D	C	M	T	H	K	T	C	N	Y	W	T	N	C	P	P	C	2	59	29.5
128	C	P	P	C	G	L	G	D	A	C	P	E	R	M	V	C	D	L	S	N	G	C	P	P	C	1	29	29
129	C	P	P	C	Y	P	L	N	L	C	N	L	T	T	M	C	S	K	I	K	T	C	P	P	C	1	29	29
130	C	P	P	C	E	I	N	F	I	C	N	I	G	T	N	C	L	N	F	T	F	C	P	P	C	6	173	28.8333
131	C	P	P	C	E	I	V	V	D	C	H	G	L	N	F	C	P	T	S	V	S	C	P	P	C	2	57	28.5
132	C	P	P	C	P	T	H	M	H	C	F	R	K	G	I	C	F	Y	I	Y	Q	C	P	P	C	1	28	28
133	C	P	P	C	R	I	P	G	L	C	S	L	W	I	G	C	S	N	L	N	S	C	P	P	C	1	28	28
134	C	P	P	C	R	V	L	E	V	C	D	V	I	P	R	C	Q	I	F	N	P	C	P	P	C	1	28	28
135	C	P	P	C	G	P	S	L	I	C	A	V	R	E	S	C	E	D	A	S	G	C	P	P	C	1	28	28
136	C	P	P	C	V	H	M	Q	L	C	N	Y	S	M	F	C	K	S	Y	A	G	C	P	P	C	1	28	28
137	C	P	P	C	D	K	N	L	*	C	Y	L	I	N	N	C	P	H	F	Y	F	C	P	P	C	1	27	27
138	C	P	P	C	H	N	F	E	F	C	N	A	N	S	A	C	*	I	Q	F	P	C	P	P	C	6	158	26.3333
139	C	P	P	C	I	N	L	V	F	C	S	Y	Y	F	N	C	H	S	Y	I	D	C	P	P	C	5	131	26.2
140	C	P	P	C	K	V	S	T	S	C	F	I	I	N	L	C	N	N	Y	N	P	C	P	P	C	1	26	26
141	C	P	P	C	L	D	L	R	N	C	L	F	R	N	I	C	S	N	T	A	V	C	P	P	C	1	26	26
142	C	P	P	C	A	S	H	T	S	C	L	Y	L	F	V	C	Q	P	F	Q	K	C	P	P	C	1	26	26
143	C	P	P	C	H	Y	A	Y	A	C	L	A	I	P	N	C	I	Y	S	Y	N	C	P	P	C	5	128	25.6
144	C	P	P	C	P	Y	A	E	S	C	Q	S	P	T	S	C	I	I	H	W	S	C	P	P	C	5	128	25.6
145	C	P	P	C	S	S	F	S	L	C	H	L	I	S	H	C	I	F	R	F	Y	C	P	P	C	1	25	25
146	C	P	P	C	Q	W	T	A	T	C	T	P	V	T	S	C	T	A	P	E	F	C	P	P	C	1	25	25
147	C	P	P	C	R	S	S	P	E	C	D	H	I	M	H	C	P	I	H	T	M	C	P	P	C	1	25	25
148	C	P	P	C	I	F	H	N	H	C	N	Y	Y	F	I	C	F	S	I	F	N	C	P	P	C	4	99	24.75
149	C	P	P	C	V	N	L	L	F	C	N	I	T	S	S	C	F	Y	S	E	V	C	P	P	C	3	74	24.6667
150	C	P	P	C	Y	I	N	F	I	C	L	F	V	M	I	C	F	Y	F	T	N	C	P	P	C	21	507	24.1429
151	C	P	P	C	Q	G	R	L	G	C	M	M	S	S	H	C	G	F	Y	L	R	C	P	P	C	1	24	24
152	C	P	P	C	S	D	L	T	Y	C	T	G	P	Y	T	C	L	T	F	D	T	C	P	P	C	1	24	24
153	C	P	P	C	F	I	D	D	Q	C	H	S	S	A	*	C	I	N	N	L	M	C	P	P	C	1	24	24
154	C	P	P	C	P	I	*	P	N	C	I	N	Y	Y	L	C	N	L	I	N	R	C	P	P	C	1	23	23
155	C	P	P	C	T	N	I	A	S	C	S	N	I	Y	T	C	F	T	T	T	F	C	P	P	C	1	22	22
156	C	P	P	C	P	*	R	I	F	C	L	S	P	I	P	C	V	N	S	S	Y	C	P	P	C	1	22	22
157	C	P	P	C	L	P	S	Q	N	C	S	Y	I	H	P	C	N	P	H	R	I	C	P	P	C	1	22	22
158	C	P	P	C	L	G	I	H	E	C	L	L	S	I	F	C	M	H	N	P	N	C	P	P	C	1	22	22
159	C	P	P	C	V	Q	L	A	D	C	N	L	Y	T	G	C	L	N	M	T	W	C	P	P	C	1	22	22
160	C	P	P	C	S	N	S	L	Q	C	L	L	N	I	H	C	I	K	L	S	R	C	P	P	C	1	22	22
161	C	P	P	C	I	Q	S	*	I	C	R	F	R	K	S	C	D	Y	F	S	Y	C	P	P	C	1	21	21
162	C	P	P	C	F	I	L	T	Y	C	F	Y	L	F	Y	C	F	N	I	F	F	C	P	P	C	1	21	21
163	C	P	P	C	I	G	S	R	Q	C	L	S	F	R	P	C	S	F	P	W	S	C	P	P	C	5	103	20.6
164	C	P	P	C	R	G	H	A	K	C	F	S	G	H	N	C	T	T	A	D	E	C	P	P	C	4	81	20.25
165	C	P	P	C	Y	Y	A	A	D	C	I	T	L	S	N	C	S	F	V	D	S	C	P	P	C	2	40	20
166	C	P	P	C	D	F	P	L	K	C	I	L	N	S	P	C	N	S	P	T	H	C	P	P	C	1	20	20
167	C	P	P	C	V	L	T	N	T	C	V	S	L	N	S	C	N	F	K	L	E	C	P	P	C	1	20	20
168	C	P	P	C	E	I	P	Q	N	C	V	S	N	L	D	C	M	M	L	Y	L	C	P	P	C	3	57	19
169	C	P	P	C	T	T	Q	L	S	C	H	I	S	H	W	C	Y	A	Y	N	I	C	P	P	C	2	38	19
170	C	P	P	C	K	G	P	A	S	C	I	Q	N	R	I	C	N	K	N	M	W	C	P	P	C	1	19	19
171	C	P	P	C	D	I	D	Y	N	C	S	I	I	R	S	C	Y	L	S	F	T	C	P	P	C	1	19	19
172	C	P	P	C	A	F	N	G	T	C	N	Y	L	T	Y	C	H	N	Q	I	R	C	P	P	C	1	19	19
173	C	P	P	C	V	L	Q	D	R	C	L	S	M	H	P	C	S	N	L	A	S	C	P	P	C	1	19	19
174	C	P	P	C	V	M	S	D	S	C	N	M	S	S	P	C	Q	F	H	G	T	C	P	P	C	7	132	18.8571
175	C	P	P	C	S	S	Y	N	F	C	F	I	N	Y	H	C	F	F	Y	I	T	C	P	P	C	7	128	18.2857
176	C	P	P	C	L	M	D	Q	K	C	P	N	F	S	N	C	I	F	D	L	R	C	P	P	C	2	36	18
177	C	P	P	C	G	G	N	S	L	C	L	Q	M	E	S	C	N	S	A	T	A	C	P	P	C	1	18	18
178	C	P	P	C	G	I	G	L	W	C	L	E	L	F	N	C	T	A	Q	I	S	C	P	P	C	1	18	18
179	C	P	P	C	V	N	P	F	Y	C	F	F	F	L	T	C	I	F	L	D	T	C	P	P	C	1	18	18
180	C	P	P	C	S	Y	Y	S	N	C	S	G	F	I	N	C	Y	F	I	N	N	C	P	P	C	1	18	18
181	C	P	P	C	W	L	D	Q	V	C	T	N	W	*	F	C	W	Y	R	K	V	C	P	P	C	1	18	18
182	C	P	P	C	W	L	P	*	P	C	L	Q	P	L	I	C	L	R	Y	S	M	C	P	P	C	1	18	18
183	C	P	P	C	N	F	P	R	P	C	H	A	F	D	P	C	N	Y	I	H	T	C	P	P	C	2	35	17.5
184	C	P	P	C	L	*	T	L	Y	C	F	L	F	F	F	C	F	Y	H	I	F	C	P	P	C	1	17	17
185	C	P	P	C	L	L	F	I	S	C	Y	N	N	H	L	C	N	F	N	F	N	C	P	P	C	6	101	16.8333
186	C	P	P	C	I	T	S	I	T	C	K	N	L	Y	R	C	T	Y	I	Y	L	C	P	P	C	2	33	16.5
187	C	P	P	C	L	M	H	H	Q	C	A	P	S	R	Y	C	I	D	N	R	P	C	P	P	C	2	33	16.5
188	C	P	P	C	Y	I	S	Q	N	C	*	S	T	L	R	C	F	N	R	S	N	C	P	P	C	6	98	16.3333
189	C	P	P	C	F	Y	N	T	L	C	I	I	H	F	R	C	Y	I	Y	N	H	C	P	P	C	2	32	16
190	C	P	P	C	P	L	G	Q	I	C	H	K	T	S	P	C	L	I	H	Y	M	C	P	P	C	1	16	16
191	C	P	P	C	R	G	I	L	R	C	H	F	N	S	L	C	V	S	F	F	S	C	P	P	C	1	16	16
192	C	P	P	C	R	T	Y	S	L	C	F	D	L	I	F	C	P	Y	I	S	F	C	P	P	C	1	16	16
193	C	P	P	C	Y	I	M	K	I	C	H	S	N	N	T	C	I	I	L	N	N	C	P	P	C	1	16	16
194	C	P	P	C	L	G	M	K	F	C	H	D	A	G	V	C	E	P	F	Y	L	C	P	P	C	1	16	16
195	C	P	P	C	F	P	F	*	M	C	F	Y	N	R	F	C	E	F	I	*	F	C	P	P	C	1	16	16
196	C	P	P	C	R	W	H	K	F	C	D	V	T	L	I	C	N	F	T	D	Y	C	P	P	C	2	30	15
197	C	P	P	C	S	G	L	*	G	C	T	S	*	A	H	C	H	S	R	T	W	C	P	P	C	1	15	15
198	C	P	P	C	S	F	H	R	A	C	P	N	T	S	L	C	F	L	L	P	T	C	P	P	C	1	15	15
199	C	P	P	C	L	T	L	V	G	C	V	A	L	F	A	C	P	D	E	P	G	C	P	P	C	1	15	15
200	C	P	P	C	F	S	I	E	S	C	H	F	L	Y	S	C	N	T	V	L	M	C	P	P	C	3	44	14.6667
201	C	P	P	C	S	S	A	L	S	C	L	P	R	D	P	C	I	R	V	T	D	C	P	P	C	1	14	14
202	C	P	P	C	S	L	P	K	R	C	M	I	V	S	F	C	N	S	S	V	S	C	P	P	C	1	14	14
203	C	P	P	C	D	T	I	P	F	C	W	L	P	H	T	C	M	S	N	D	L	C	P	P	C	1	14	14
204	C	P	P	C	G	T	F	D	Y	C	T	Y	L	Y	L	C	Y	Y	V	F	L	C	P	P	C	1	14	14
205	C	P	P	C	W	R	P	S	R	C	A	V	M	H	R	C	P	V	P	L	A	C	P	P	C	1	14	14
206	C	P	P	C	W	I	M	M	K	C	F	N	K	T	S	C	F	D	L	F	N	C	P	P	C	1	14	14
207	C	P	P	C	L	H	P	K	A	C	F	P	S	V	D	C	L	N	P	T	T	C	P	P	C	1	14	14
208	C	P	P	C	F	I	I	F	R	C	Y	N	*	F	L	C	K	N	Y	F	Y	C	P	P	C	1	14	14
209	C	P	P	C	F	S	V	F	I	C	T	F	Y	L	S	C	R	I	P	F	R	C	P	P	C	1	14	14
210	C	P	P	C	*	Q	F	N	I	C	N	H	I	F	Y	C	Y	N	H	Y	Y	C	P	P	C	3	41	13.6667
211	C	P	P	C	N	K	L	T	F	C	N	F	H	I	F	C	F	V	V	Y	T	C	P	P	C	1	13	13
212	C	P	P	C	L	N	H	F	V	C	F	H	I	F	N	C	F	N	I	I	F	C	P	P	C	1	13	13
213	C	P	P	C	D	S	L	E	K	C	L	N	T	P	S	C	Y	R	D	T	I	C	P	P	C	1	13	13
214	C	P	P	C	*	A	P	K	R	C	L	N	R	M	L	C	F	T	F	I	I	C	P	P	C	1	13	13
215	C	P	P	C	*	F	S	Y	H	C	N	N	N	F	P	C	F	L	S	Y	N	C	P	P	C	1	13	13
216	C	P	P	C	F	I	F	Y	F	C	N	L	L	Y	Y	C	Y	Y	F	I	I	C	P	P	C	6	74	12.3333
217	C	P	P	C	N	Y	P	L	S	C	F	N	N	T	I	C	T	N	I	K	H	C	P	P	C	4	48	12
218	C	P	P	C	N	Q	T	R	V	C	F	L	P	I	E	C	I	Q	M	L	I	C	P	P	C	1	12	12
219	C	P	P	C	T	P	N	T	S	C	F	P	S	E	K	C	P	N	A	L	Q	C	P	P	C	1	12	12
220	C	P	P	C	S	P	L	M	S	C	P	H	Y	K	T	C	A	A	G	S	G	C	P	P	C	1	12	12
221	C	P	P	C	R	G	Q	S	R	C	L	K	K	H	W	C	S	M	H	T	H	C	P	P	C	1	12	12
222	C	P	P	C	L	L	S	L	D	C	K	K	L	N	S	C	L	W	K	F	E	C	P	P	C	1	12	12
223	C	P	P	C	A	T	V	S	R	C	T	N	N	L	P	C	Y	P	P	D	S	C	P	P	C	1	12	12
224	C	P	P	C	S	E	V	L	T	C	S	F	T	S	S	C	T	S	N	L	S	C	P	P	C	1	12	12
225	C	P	P	C	S	L	L	A	D	C	I	Y	F	H	P	C	N	L	S	L	H	C	P	P	C	1	12	12
226	C	P	P	C	K	K	I	T	K	C	F	Y	S	H	S	C	N	F	I	Q	Y	C	P	P	C	1	11	11
227	C	P	P	C	N	L	M	D	K	C	I	L	N	T	P	C	F	N	Q	L	I	C	P	P	C	1	11	11
228	C	P	P	C	N	L	V	Q	H	C	L	A	S	P	N	C	S	I	P	S	P	C	P	P	C	1	11	11
229	C	P	P	C	M	R	R	W	D	C	F	F	L	S	N	C	*	Y	I	N	R	C	P	P	C	1	11	11
230	C	P	P	C	M	L	L	T	L	C	F	H	Y	P	K	C	F	Y	H	N	F	C	P	P	C	1	11	11
231	C	P	P	C	Q	N	L	S	I	C	N	L	I	P	I	C	S	Y	H	I	H	C	P	P	C	1	11	11
232	C	P	P	C	Q	L	R	S	I	C	Y	N	H	S	S	C	S	I	L	Y	N	C	P	P	C	1	11	11
233	C	P	P	C	H	S	S	D	Y	C	T	L	S	S	N	C	I	T	I	Q	L	C	P	P	C	1	11	11
234	C	P	P	C	P	R	T	P	A	C	I	R	S	G	Y	C	A	T	A	A	T	C	P	P	C	1	11	11
235	C	P	P	C	P	D	*	K	A	C	T	Y	N	M	L	C	L	I	M	K	K	C	P	P	C	1	11	11
236	C	P	P	C	R	D	L	I	I	C	R	I	L	F	L	C	Y	I	S	K	Y	C	P	P	C	1	11	11
237	C	P	P	C	L	M	H	T	D	C	I	D	R	N	N	C	N	S	N	L	H	C	P	P	C	1	11	11
238	C	P	P	C	L	A	Q	S	N	C	M	H	T	T	Y	C	N	S	V	N	W	C	P	P	C	1	11	11
239	C	P	P	C	A	M	F	Q	N	C	T	Y	S	L	D	C	N	S	I	F	I	C	P	P	C	1	11	11
240	C	P	P	C	A	F	N	D	S	C	F	F	I	P	K	C	N	T	Q	L	F	C	P	P	C	1	11	11
241	C	P	P	C	V	L	R	N	S	C	S	F	F	S	P	C	L	F	H	L	S	C	P	P	C	1	11	11
242	C	P	P	C	*	F	N	Y	L	C	F	F	F	Y	F	C	F	F	I	Y	I	C	P	P	C	1	11	11
243	C	P	P	C	L	V	H	P	K	C	H	Y	R	N	L	C	Y	N	F	T	N	C	P	P	C	1	11	11
244	C	P	P	C	F	K	M	R	Q	C	Q	L	S	L	R	C	Y	W	S	G	W	C	P	P	C	1	11	11
245	C	P	P	C	G	N	M	A	L	C	K	L	K	K	Y	C	S	F	I	L	R	C	P	P	C	3	30	10
246	C	P	P	C	N	R	A	P	Y	C	R	Y	Q	I	S	C	E	N	S	Y	Y	C	P	P	C	1	10	10
247	C	P	P	C	T	I	F	F	I	C	Y	I	L	I	Y	C	L	F	N	N	S	C	P	P	C	1	10	10
248	C	P	P	C	R	T	K	K	N	C	F	Q	I	H	S	C	K	N	F	N	Y	C	P	P	C	1	10	10
249	C	P	P	C	I	F	N	L	Y	C	F	F	H	F	I	C	F	Y	H	N	N	C	P	P	C	1	10	10
250	C	P	P	C	Q	Y	F	H	H	C	N	N	I	I	S	C	I	N	R	Y	L	C	P	P	C	1	10	10
251	C	P	P	C	R	N	Y	L	T	C	E	V	S	P	P	C	L	W	Q	S	N	C	P	P	C	1	10	10
252	C	P	P	C	R	A	E	G	V	C	E	G	N	S	I	C	N	I	I	A	F	C	P	P	C	1	10	10
253	C	P	P	C	V	T	H	N	N	C	F	S	L	S	*	C	*	I	Y	N	N	C	P	P	C	1	10	10
254	C	P	P	C	V	L	D	R	F	C	N	L	R	T	S	C	Y	D	I	M	T	C	P	P	C	1	10	10
255	C	P	P	C	L	F	I	N	F	C	I	I	I	F	Y	C	Y	F	Y	F	F	C	P	P	C	1	10	10
256	C	P	P	C	G	P	N	N	I	C	N	Y	K	S	M	C	F	S	F	L	L	C	P	P	C	2	19	9.5
257	C	P	P	C	S	R	Y	R	S	C	R	G	M	A	H	C	V	S	N	N	S	C	P	P	C	1	9	9
258	C	P	P	C	M	L	L	V	P	C	L	S	L	S	F	C	M	H	K	P	Y	C	P	P	C	1	9	9
259	C	P	P	C	Q	D	H	D	V	C	S	K	S	Q	I	C	Y	L	L	N	P	C	P	P	C	1	9	9
260	C	P	P	C	H	T	S	N	I	C	I	T	H	R	F	C	Y	S	R	N	V	C	P	P	C	1	9	9
261	C	P	P	C	P	D	L	L	L	C	N	Y	S	L	Q	C	F	R	I	L	N	C	P	P	C	1	9	9
262	C	P	P	C	L	T	S	M	I	C	I	Y	K	I	*	C	I	N	L	I	Y	C	P	P	C	1	9	9
263	C	P	P	C	L	S	R	R	P	C	L	*	N	L	L	C	P	P	N	S	L	C	P	P	C	1	9	9
264	C	P	P	C	L	I	N	R	N	C	N	I	S	S	F	C	N	I	Y	N	R	C	P	P	C	1	9	9
265	C	P	P	C	L	I	Y	L	F	C	I	Y	N	F	I	C	F	N	I	Y	H	C	P	P	C	1	9	9
266	C	P	P	C	E	I	K	F	N	C	S	H	I	N	E	C	S	Y	Y	F	T	C	P	P	C	1	9	9
267	C	P	P	C	V	S	P	R	L	C	F	*	M	M	L	C	L	S	V	I	A	C	P	P	C	1	9	9
268	C	P	P	C	W	R	M	A	S	C	F	K	K	T	S	C	A	T	G	G	S	C	P	P	C	1	9	9
269	C	P	P	C	F	I	Y	L	I	C	I	T	T	Y	G	C	N	F	W	Y	K	C	P	P	C	1	9	9
270	C	P	P	C	F	I	S	Y	F	C	I	R	F	F	P	C	F	S	Y	K	N	C	P	P	C	1	9	9
271	C	P	P	C	P	I	Y	N	L	C	Y	I	N	H	S	C	P	I	F	P	N	C	P	P	C	2	17	8.5
272	C	P	P	C	Y	V	H	L	R	C	S	N	L	P	L	C	K	R	A	M	S	C	P	P	C	2	17	8.5
273	C	P	P	C	D	F	*	F	R	C	F	F	Q	I	H	C	F	Y	I	L	Y	C	P	P	C	3	24	8
274	C	P	P	C	L	P	L	M	Y	C	W	H	S	F	T	C	Y	I	*	K	Q	C	P	P	C	2	16	8
275	C	P	P	C	N	F	I	F	I	C	I	N	L	T	N	C	N	Y	I	Y	I	C	P	P	C	1	8	8
276	C	P	P	C	T	*	I	S	P	C	T	W	I	P	*	C	G	F	S	L	S	C	P	P	C	1	8	8
277	C	P	P	C	T	I	A	S	Y	C	N	M	H	T	T	C	*	S	Q	S	F	C	P	P	C	1	8	8
278	C	P	P	C	S	I	D	L	G	C	S	T	G	S	L	C	N	I	S	H	T	C	P	P	C	1	8	8
279	C	P	P	C	M	L	D	I	Y	C	S	N	R	T	L	C	A	A	F	S	N	C	P	P	C	1	8	8
280	C	P	P	C	M	D	T	Y	E	C	I	H	L	I	N	C	P	F	M	L	P	C	P	P	C	1	8	8
281	C	P	P	C	I	D	F	S	P	C	S	R	N	N	P	C	L	I	L	N	Q	C	P	P	C	1	8	8
282	C	P	P	C	Q	R	N	L	S	C	L	S	V	N	R	C	I	R	T	I	S	C	P	P	C	1	8	8
283	C	P	P	C	H	Q	N	N	I	C	H	N	I	E	I	C	N	N	I	I	D	C	P	P	C	1	8	8
284	C	P	P	C	P	L	R	L	A	C	V	P	R	A	A	C	M	A	P	D	H	C	P	P	C	1	8	8
285	C	P	P	C	R	M	T	S	G	C	N	I	E	H	L	C	Y	S	H	D	H	C	P	P	C	1	8	8
286	C	P	P	C	L	L	L	K	F	C	N	I	S	F	I	C	N	I	H	F	K	C	P	P	C	1	8	8
287	C	P	P	C	L	Y	S	H	D	C	P	L	S	S	S	C	F	D	H	Q	S	C	P	P	C	1	8	8
288	C	P	P	C	E	I	D	V	P	C	E	P	R	M	I	C	Y	T	A	H	N	C	P	P	C	1	8	8
289	C	P	P	C	V	G	G	F	D	C	A	K	Y	F	S	C	N	Y	T	S	E	C	P	P	C	1	8	8
290	C	P	P	C	V	F	F	F	N	C	F	F	S	F	V	C	R	F	F	F	F	C	P	P	C	1	8	8
291	C	P	P	C	*	R	Y	T	I	C	Y	Y	I	S	D	C	I	Y	I	F	Y	C	P	P	C	1	8	8
292	C	P	P	C	Y	T	R	N	S	C	I	F	N	Y	S	C	L	Y	F	P	S	C	P	P	C	1	8	8
293	C	P	P	C	Y	L	N	T	P	C	Y	Q	S	H	R	C	H	F	L	N	*	C	P	P	C	1	8	8
294	C	P	P	C	L	R	Y	T	G	C	V	N	V	Y	Y	C	L	F	A	A	Y	C	P	P	C	1	8	8
295	C	P	P	C	L	L	F	T	T	C	P	P	F	H	S	C	N	N	H	*	N	C	P	P	C	1	8	8
296	C	P	P	C	R	Q	K	E	L	C	I	V	Q	H	P	C	L	Y	N	A	T	C	P	P	C	2	14	7
297	C	P	P	C	K	K	G	N	S	C	N	H	T	Y	I	C	S	F	L	*	N	C	P	P	C	1	7	7
298	C	P	P	C	K	H	L	I	Y	C	F	L	I	Y	R	C	Y	I	N	N	F	C	P	P	C	1	7	7
299	C	P	P	C	N	T	P	L	P	C	H	W	L	W	N	C	S	T	T	S	I	C	P	P	C	1	7	7
300	C	P	P	C	N	F	I	N	Y	C	N	T	N	T	L	C	M	N	L	Y	I	C	P	P	C	1	7	7
301	C	P	P	C	R	I	I	N	L	C	A	M	H	I	P	C	F	H	S	M	P	C	P	P	C	1	7	7
302	C	P	P	C	R	I	H	S	H	C	D	P	S	T	I	C	I	F	N	D	H	C	P	P	C	1	7	7
303	C	P	P	C	R	F	I	L	D	C	F	A	L	K	Q	C	N	A	D	P	L	C	P	P	C	1	7	7
304	C	P	P	C	M	I	D	F	L	C	N	Y	I	S	E	C	N	Y	S	L	P	C	P	P	C	1	7	7
305	C	P	P	C	M	F	R	L	M	C	T	N	P	M	M	C	M	N	F	S	Y	C	P	P	C	1	7	7
306	C	P	P	C	I	*	L	N	F	C	F	F	K	N	R	C	F	I	N	F	Y	C	P	P	C	1	7	7
307	C	P	P	C	Q	I	E	D	Y	C	Y	L	L	T	S	C	G	R	H	P	P	C	P	P	C	1	7	7
308	C	P	P	C	P	A	T	L	D	C	L	F	N	N	S	C	Y	Y	N	T	H	C	P	P	C	1	7	7
309	C	P	P	C	P	L	D	T	H	C	N	E	S	S	I	C	S	S	H	I	R	C	P	P	C	1	7	7
310	C	P	P	C	R	I	M	*	W	C	H	S	V	S	F	C	F	F	Y	S	W	C	P	P	C	1	7	7
311	C	P	P	C	L	N	S	N	R	C	L	N	L	Y	M	C	S	F	N	N	T	C	P	P	C	1	7	7
312	C	P	P	C	L	M	S	T	*	C	*	T	T	F	R	C	T	H	I	T	S	C	P	P	C	1	7	7
313	C	P	P	C	L	Y	S	R	M	C	I	I	L	F	Y	C	T	T	N	F	N	C	P	P	C	1	7	7
314	C	P	P	C	E	M	R	S	I	C	S	V	S	S	D	C	D	H	V	L	P	C	P	P	C	1	7	7
315	C	P	P	C	G	K	N	T	T	C	F	T	Q	N	H	C	F	Y	I	T	I	C	P	P	C	1	7	7
316	C	P	P	C	G	N	R	Y	L	C	T	F	S	Q	I	C	M	F	N	K	L	C	P	P	C	1	7	7
317	C	P	P	C	V	N	I	V	S	C	N	L	A	Q	A	C	L	M	I	T	W	C	P	P	C	1	7	7
318	C	P	P	C	S	I	S	S	M	C	D	Y	N	L	T	C	Y	S	I	H	N	C	P	P	C	1	7	7
319	C	P	P	C	S	G	N	L	S	C	L	T	N	S	P	C	I	L	L	F	P	C	P	P	C	1	7	7
320	C	P	P	C	F	D	T	K	H	C	W	H	L	Y	Y	C	A	S	S	L	T	C	P	P	C	1	7	7
321	C	P	P	C	F	Y	F	N	I	C	K	V	I	V	S	C	M	N	I	H	N	C	P	P	C	1	7	7
322	C	P	P	C	F	W	N	N	I	C	S	F	I	K	S	C	S	L	N	I	T	C	P	P	C	1	7	7
323	C	P	P	C	F	F	*	F	I	C	D	I	F	M	I	C	F	Y	V	M	F	C	P	P	C	1	7	7
324	C	P	P	C	F	F	F	N	T	C	H	N	F	Y	L	C	N	N	I	N	L	C	P	P	C	1	7	7
325	C	P	P	C	S	L	N	T	L	C	T	N	F	L	F	C	Y	I	N	Y	S	C	P	P	C	6	41	6.83333
326	C	P	P	C	N	N	L	Y	N	C	I	S	V	N	S	C	L	T	M	L	N	C	P	P	C	4	24	6
327	C	P	P	C	Q	D	V	*	F	C	L	G	F	T	T	C	L	V	P	F	N	C	P	P	C	2	12	6
328	C	P	P	C	N	H	D	N	I	C	H	L	N	N	L	C	D	R	*	Q	I	C	P	P	C	1	6	6
329	C	P	P	C	N	L	T	D	V	C	R	P	Y	V	T	C	L	S	P	Y	T	C	P	P	C	1	6	6
330	C	P	P	C	T	I	S	F	D	C	L	Q	S	N	P	C	N	I	L	I	Q	C	P	P	C	1	6	6
331	C	P	P	C	T	Q	T	L	S	C	N	K	M	W	H	C	F	S	H	Y	Y	C	P	P	C	1	6	6
332	C	P	P	C	T	F	Y	T	H	C	S	M	P	N	L	C	L	D	K	K	L	C	P	P	C	1	6	6
333	C	P	P	C	T	N	N	N	Y	C	I	Y	F	L	F	C	M	Q	K	V	*	C	P	P	C	1	6	6
334	C	P	P	C	S	K	A	L	Y	C	Q	G	*	T	K	C	E	H	I	E	R	C	P	P	C	1	6	6
335	C	P	P	C	S	T	M	E	N	C	Y	N	F	I	Y	C	F	N	N	I	F	C	P	P	C	1	6	6
336	C	P	P	C	S	I	L	P	D	C	S	S	M	S	D	C	N	Y	P	N	N	C	P	P	C	1	6	6
337	C	P	P	C	S	L	G	L	H	C	S	A	R	Y	L	C	H	G	H	F	N	C	P	P	C	1	6	6
338	C	P	P	C	S	V	L	H	P	C	P	N	Q	N	T	C	I	V	D	F	F	C	P	P	C	1	6	6
339	C	P	P	C	S	S	Y	Y	F	C	L	Y	M	N	I	C	I	D	Y	D	I	C	P	P	C	1	6	6
340	C	P	P	C	I	I	P	S	R	C	V	E	L	P	N	C	N	A	R	N	N	C	P	P	C	1	6	6
341	C	P	P	C	I	H	M	M	P	C	F	G	W	M	I	C	I	T	*	H	L	C	P	P	C	1	6	6
342	C	P	P	C	H	P	W	K	D	C	I	S	I	N	N	C	S	K	P	I	I	C	P	P	C	1	6	6
343	C	P	P	C	H	S	F	R	G	C	H	I	R	L	G	C	N	Y	T	Y	R	C	P	P	C	1	6	6
344	C	P	P	C	P	R	L	A	G	C	H	I	P	P	P	C	F	W	A	R	A	C	P	P	C	1	6	6
345	C	P	P	C	P	L	T	M	H	C	N	Y	F	N	M	C	S	S	I	N	T	C	P	P	C	1	6	6
346	C	P	P	C	P	F	L	E	W	C	L	E	T	Q	Y	C	L	R	S	W	P	C	P	P	C	1	6	6
347	C	P	P	C	R	S	F	F	F	C	N	W	Q	P	F	C	I	I	*	D	W	C	P	P	C	1	6	6
348	C	P	P	C	R	R	P	Q	*	C	L	H	P	Q	F	C	H	F	M	F	D	C	P	P	C	1	6	6
349	C	P	P	C	R	F	A	S	D	C	M	Y	T	F	R	C	Y	F	S	N	S	C	P	P	C	1	6	6
350	C	P	P	C	R	F	G	T	L	C	*	T	*	Q	M	C	N	P	G	F	K	C	P	P	C	1	6	6
351	C	P	P	C	L	D	P	E	I	C	N	F	R	T	V	C	F	Y	H	L	N	C	P	P	C	1	6	6
352	C	P	P	C	L	G	G	S	G	C	*	D	M	P	P	C	P	F	S	Q	S	C	P	P	C	1	6	6
353	C	P	P	C	L	N	I	S	K	C	Y	F	Y	S	Q	C	N	F	I	Y	F	C	P	P	C	1	6	6
354	C	P	P	C	L	M	S	V	Y	C	T	F	Q	F	L	C	F	N	V	Y	F	C	P	P	C	1	6	6
355	C	P	P	C	L	I	E	S	H	C	Q	T	P	P	M	C	N	H	S	L	L	C	P	P	C	1	6	6
356	C	P	P	C	L	R	P	K	N	C	D	I	S	F	R	C	F	N	Y	R	Y	C	P	P	C	1	6	6
357	C	P	P	C	L	D	Y	Y	H	C	P	P	M	N	V	C	Y	V	Y	F	S	C	P	P	C	1	6	6
358	C	P	P	C	D	L	P	F	R	C	P	M	G	F	G	C	N	P	K	I	M	C	P	P	C	1	6	6
359	C	P	P	C	G	E	S	G	R	C	H	P	R	K	Q	C	T	R	F	L	F	C	P	P	C	1	6	6
360	C	P	P	C	V	K	P	I	F	C	G	R	T	L	Q	C	N	H	V	H	N	C	P	P	C	1	6	6
361	C	P	P	C	V	I	I	Q	N	C	I	I	Y	R	*	C	I	M	L	P	I	C	P	P	C	1	6	6
362	C	P	P	C	*	H	M	I	L	C	L	T	L	L	N	C	F	N	T	Y	D	C	P	P	C	1	6	6
363	C	P	P	C	*	Y	I	R	H	C	Y	N	T	I	L	C	I	Y	F	F	F	C	P	P	C	1	6	6
364	C	P	P	C	*	L	I	L	L	C	N	P	T	H	T	C	Y	N	L	I	S	C	P	P	C	1	6	6
365	C	P	P	C	Y	N	L	W	F	C	F	H	Y	Y	H	C	M	N	*	S	T	C	P	P	C	1	6	6
366	C	P	P	C	Y	L	N	T	N	C	F	H	I	F	N	C	S	N	S	F	N	C	P	P	C	1	6	6
367	C	P	P	C	Y	Y	S	W	I	C	W	A	*	I	R	C	F	N	G	K	L	C	P	P	C	1	6	6
368	C	P	P	C	Y	W	P	M	I	C	L	N	T	S	M	C	R	N	N	N	N	C	P	P	C	1	6	6
369	C	P	P	C	S	T	N	E	R	C	Y	I	Y	I	S	C	N	T	L	K	T	C	P	P	C	1	6	6
370	C	P	P	C	S	Q	D	M	L	C	N	F	T	T	E	C	F	I	S	N	H	C	P	P	C	1	6	6
371	C	P	P	C	W	P	N	T	H	C	S	L	I	H	N	C	L	I	S	T	T	C	P	P	C	1	6	6
372	C	P	P	C	L	N	H	N	R	C	P	P	Q	F	S	C	A	V	L	D	E	C	P	P	C	1	6	6
373	C	P	P	C	M	P	H	L	I	C	Y	I	F	L	L	C	Y	Y	I	Y	Y	C	P	P	C	2	10	5
374	C	P	P	C	K	F	F	I	V	C	V	A	M	D	S	C	Y	S	H	F	H	C	P	P	C	1	5	5
375	C	P	P	C	N	T	S	H	F	C	N	L	F	*	N	C	Y	I	F	L	H	C	P	P	C	1	5	5
376	C	P	P	C	N	V	F	W	T	C	F	F	L	I	N	C	F	Y	F	I	N	C	P	P	C	1	5	5
377	C	P	P	C	T	N	T	S	L	C	R	N	Y	H	S	C	F	Y	Y	H	T	C	P	P	C	1	5	5
378	C	P	P	C	T	P	R	Q	I	C	Y	P	L	K	E	C	P	I	D	F	S	C	P	P	C	1	5	5
379	C	P	P	C	T	R	S	Q	K	C	V	E	L	F	T	C	P	N	T	F	D	C	P	P	C	1	5	5
380	C	P	P	C	T	D	V	R	S	C	K	P	L	T	P	C	M	N	N	F	R	C	P	P	C	1	5	5
381	C	P	P	C	S	H	Y	N	*	C	Y	I	H	P	Y	C	Y	T	T	H	F	C	P	P	C	1	5	5
382	C	P	P	C	S	D	Y	*	Y	C	N	S	Y	I	N	C	L	F	S	S	N	C	P	P	C	1	5	5
383	C	P	P	C	M	D	P	E	I	C	T	F	R	T	V	C	F	Y	H	L	N	C	P	P	C	1	5	5
384	C	P	P	C	I	R	R	Y	Y	C	H	T	P	R	F	C	M	R	*	R	Y	C	P	P	C	1	5	5
385	C	P	P	C	P	S	V	V	H	C	S	P	E	T	T	C	N	N	L	L	S	C	P	P	C	1	5	5
386	C	P	P	C	P	I	D	F	P	C	I	Y	S	T	W	C	I	Y	F	F	S	C	P	P	C	1	5	5
387	C	P	P	C	R	L	Y	T	N	C	I	S	*	L	Y	C	F	F	I	M	N	C	P	P	C	1	5	5
388	C	P	P	C	R	D	V	A	D	C	N	I	P	L	L	C	M	S	S	L	Y	C	P	P	C	1	5	5
389	C	P	P	C	R	W	K	V	T	C	H	P	A	P	L	C	L	L	M	P	S	C	P	P	C	1	5	5
390	C	P	P	C	R	P	S	T	G	C	Q	I	T	K	N	C	Y	T	P	S	T	C	P	P	C	1	5	5
391	C	P	P	C	L	I	R	S	S	C	Q	P	T	V	N	C	S	L	S	Y	F	C	P	P	C	1	5	5
392	C	P	P	C	L	I	N	N	F	C	I	N	F	N	S	C	S	F	F	L	Y	C	P	P	C	1	5	5
393	C	P	P	C	L	H	L	N	L	C	S	N	T	N	L	C	Y	Y	Y	N	*	C	P	P	C	1	5	5
394	C	P	P	C	A	N	P	L	D	C	I	R	N	S	A	C	N	N	V	T	Y	C	P	P	C	1	5	5
395	C	P	P	C	A	L	V	N	H	C	H	N	V	T	L	C	N	N	L	Q	T	C	P	P	C	1	5	5
396	C	P	P	C	G	R	Y	S	I	C	D	I	K	L	S	C	I	N	L	S	N	C	P	P	C	1	5	5
397	C	P	P	C	G	S	I	P	F	C	T	I	Q	L	I	C	P	D	I	L	T	C	P	P	C	1	5	5
398	C	P	P	C	V	H	S	T	H	C	L	Y	L	T	I	C	S	L	Y	Y	N	C	P	P	C	1	5	5
399	C	P	P	C	V	L	V	L	T	C	T	L	H	T	M	C	N	S	T	F	S	C	P	P	C	1	5	5
400	C	P	P	C	V	F	M	T	I	C	Y	F	T	Y	Y	C	L	I	L	H	Q	C	P	P	C	1	5	5
401	C	P	P	C	*	F	I	S	W	C	F	N	L	I	F	C	E	R	L	Y	S	C	P	P	C	1	5	5
402	C	P	P	C	S	Q	N	Y	K	C	Y	K	I	P	N	C	I	F	M	I	L	C	P	P	C	1	5	5
403	C	P	P	C	L	L	H	S	Y	C	N	Y	N	L	N	C	I	Y	P	F	S	C	P	P	C	1	5	5
404	C	P	P	C	S	V	T	M	I	C	P	Y	T	S	L	C	Y	I	D	Y	I	C	P	P	C	2	9	4.5
405	C	P	P	C	D	L	L	Q	Q	C	L	H	I	S	N	C	W	N	I	K	T	C	P	P	C	2	9	4.5
406	C	P	P	C	L	H	L	Q	I	C	I	N	F	Y	F	C	L	I	F	*	F	C	P	P	C	2	9	4.5
407	C	P	P	C	R	G	V	R	R	C	D	L	S	A	T	C	Q	T	V	L	P	C	P	P	C	3	13	4.33333
408	C	P	P	C	L	T	M	P	I	C	L	S	I	T	I	C	F	N	M	T	L	C	P	P	C	3	13	4.33333
409	C	P	P	C	H	N	A	N	L	C	V	T	T	N	W	C	H	N	F	S	T	C	P	P	C	3	12	4
410	C	P	P	C	*	G	S	L	S	C	D	R	W	L	L	C	I	S	A	S	L	C	P	P	C	3	12	4
411	C	P	P	C	I	S	R	K	Y	C	T	V	*	R	H	C	F	R	F	F	L	C	P	P	C	2	8	4
412	C	P	P	C	T	S	M	Y	N	C	T	M	M	S	S	C	E	N	Y	Y	N	C	P	P	C	1	4	4
413	C	P	P	C	T	L	Y	H	F	C	N	H	N	Y	T	C	I	N	Q	N	Y	C	P	P	C	1	4	4
414	C	P	P	C	R	S	*	M	P	C	H	M	*	N	F	C	N	S	R	Q	N	C	P	P	C	1	4	4
415	C	P	P	C	R	L	V	L	R	C	A	S	S	A	P	C	N	H	S	P	S	C	P	P	C	1	4	4
416	C	P	P	C	R	S	A	W	*	C	N	S	R	P	K	C	T	I	W	W	L	C	P	P	C	1	4	4
417	C	P	P	C	S	T	L	V	G	C	S	T	N	I	P	C	W	N	P	P	A	C	P	P	C	1	4	4
418	C	P	P	C	S	L	M	Y	F	C	Y	I	K	G	Q	C	Y	L	N	M	T	C	P	P	C	1	4	4
419	C	P	P	C	S	L	K	Y	V	C	N	R	M	E	S	C	N	K	F	D	K	C	P	P	C	1	4	4
420	C	P	P	C	S	L	P	M	S	C	S	S	Q	R	Y	C	L	V	P	N	Y	C	P	P	C	1	4	4
421	C	P	P	C	M	L	T	L	G	C	K	L	Y	T	L	C	D	K	W	H	K	C	P	P	C	1	4	4
422	C	P	P	C	M	D	P	E	I	C	K	F	R	T	V	C	F	Y	H	L	N	C	P	P	C	1	4	4
423	C	P	P	C	M	S	Y	H	N	C	V	T	R	M	D	C	L	I	Q	D	R	C	P	P	C	1	4	4
424	C	P	P	C	M	W	N	T	N	C	V	P	K	L	A	C	L	D	H	K	E	C	P	P	C	1	4	4
425	C	P	P	C	I	K	K	V	L	C	T	F	I	*	N	C	Y	M	F	F	K	C	P	P	C	1	4	4
426	C	P	P	C	I	K	Y	L	S	C	I	T	I	I	Y	C	I	I	N	I	F	C	P	P	C	1	4	4
427	C	P	P	C	I	L	K	N	H	C	F	S	I	K	P	C	H	F	N	F	T	C	P	P	C	1	4	4
428	C	P	P	C	H	S	Q	F	R	C	N	S	P	Y	S	C	M	Y	N	K	H	C	P	P	C	1	4	4
429	C	P	P	C	H	L	N	R	K	C	Y	N	N	Y	F	C	I	I	D	F	N	C	P	P	C	1	4	4
430	C	P	P	C	H	G	I	Q	N	C	T	R	T	P	D	C	P	S	D	M	T	C	P	P	C	1	4	4
431	C	P	P	C	H	L	S	L	F	C	Y	F	F	N	L	C	I	F	S	N	N	C	P	P	C	1	4	4
432	C	P	P	C	P	K	I	N	N	C	N	I	T	I	Y	C	Y	S	N	K	P	C	P	P	C	1	4	4
433	C	P	P	C	P	I	A	P	D	C	M	E	S	S	G	C	R	T	L	I	R	C	P	P	C	1	4	4
434	C	P	P	C	R	I	P	R	A	C	P	L	S	T	T	C	I	E	S	F	K	C	P	P	C	1	4	4
435	C	P	P	C	R	V	A	R	T	C	A	S	L	S	Y	C	*	T	T	E	V	C	P	P	C	1	4	4
436	C	P	P	C	R	S	V	T	H	C	I	S	T	F	E	C	A	F	I	F	L	C	P	P	C	1	4	4
437	C	P	P	C	R	W	A	T	D	C	S	P	T	R	T	C	N	M	F	D	R	C	P	P	C	1	4	4
438	C	P	P	C	R	I	G	N	S	C	P	V	W	H	L	C	S	I	D	T	H	C	P	P	C	1	4	4
439	C	P	P	C	R	H	D	F	L	C	N	L	Y	I	T	C	M	M	H	G	Y	C	P	P	C	1	4	4
440	C	P	P	C	R	Y	T	A	P	C	I	P	R	A	P	C	D	T	P	L	R	C	P	P	C	1	4	4
441	C	P	P	C	R	W	N	V	*	C	L	I	N	K	Q	C	F	F	Y	Y	N	C	P	P	C	1	4	4
442	C	P	P	C	L	N	Y	D	L	C	L	S	D	N	L	C	S	R	K	N	F	C	P	P	C	1	4	4
443	C	P	P	C	L	T	Y	D	L	C	L	S	Y	N	L	C	S	R	K	N	F	C	P	P	C	1	4	4
444	C	P	P	C	L	E	E	F	E	C	Y	S	T	S	G	C	R	I	F	Q	L	C	P	P	C	1	4	4
445	C	P	P	C	L	R	I	D	M	C	N	V	T	H	M	C	L	T	I	F	N	C	P	P	C	1	4	4
446	C	P	P	C	L	V	Y	L	N	C	S	I	Y	F	L	C	N	S	L	N	S	C	P	P	C	1	4	4
447	C	P	P	C	L	Y	L	Y	P	C	F	F	T	Y	R	C	F	F	H	Y	F	C	P	P	C	1	4	4
448	C	P	P	C	L	F	F	S	Y	C	I	Y	H	S	N	C	Y	R	L	Y	L	C	P	P	C	1	4	4
449	C	P	P	C	E	G	H	P	L	C	P	I	I	T	T	C	F	K	L	T	Y	C	P	P	C	1	4	4
450	C	P	P	C	D	R	V	V	L	C	A	R	K	I	R	C	H	M	A	S	P	C	P	P	C	1	4	4
451	C	P	P	C	A	S	F	L	L	C	P	S	L	S	I	C	I	T	Y	D	L	C	P	P	C	1	4	4
452	C	P	P	C	A	L	H	P	S	C	N	T	S	L	A	C	N	D	L	L	N	C	P	P	C	1	4	4
453	C	P	P	C	G	D	W	Q	N	C	W	V	P	S	V	C	S	I	F	*	*	C	P	P	C	1	4	4
454	C	P	P	C	G	G	F	R	R	C	V	Y	M	T	S	C	I	I	L	R	N	C	P	P	C	1	4	4
455	C	P	P	C	G	F	E	M	L	C	*	I	F	Y	S	C	F	T	K	P	N	C	P	P	C	1	4	4
456	C	P	P	C	V	N	T	Q	N	C	*	L	F	I	P	C	I	Y	I	K	R	C	P	P	C	1	4	4
457	C	P	P	C	V	A	F	L	N	C	T	N	T	H	L	C	T	T	L	K	T	C	P	P	C	1	4	4
458	C	P	P	C	V	Y	S	N	M	C	F	H	I	P	P	C	N	F	H	I	K	C	P	P	C	1	4	4
459	C	P	P	C	V	Y	L	P	S	C	A	H	V	T	S	C	N	F	T	H	N	C	P	P	C	1	4	4
460	C	P	P	C	V	F	I	M	I	C	L	L	I	F	W	C	I	Y	F	Q	H	C	P	P	C	1	4	4
461	C	P	P	C	*	V	N	L	Y	C	F	Y	P	N	S	C	D	F	F	I	M	C	P	P	C	1	4	4
462	C	P	P	C	Y	P	N	F	Y	C	L	N	S	H	S	C	H	W	I	*	M	C	P	P	C	1	4	4
463	C	P	P	C	Y	R	L	I	S	C	D	N	Y	Y	Y	C	T	F	S	D	K	C	P	P	C	1	4	4
464	C	P	P	C	Y	F	R	D	R	C	R	I	I	F	W	C	G	F	V	S	*	C	P	P	C	1	4	4
465	C	P	P	C	S	Q	D	M	L	C	N	F	T	T	D	C	F	S	S	N	H	C	P	P	C	1	4	4
466	C	P	P	C	S	F	F	*	L	C	F	I	N	H	N	C	F	I	F	I	F	C	P	P	C	1	4	4
467	C	P	P	C	W	H	F	P	M	C	N	S	L	N	L	C	Y	T	L	F	H	C	P	P	C	1	4	4
468	C	P	P	C	W	Y	*	A	R	C	I	V	A	R	F	C	H	K	D	*	R	C	P	P	C	1	4	4
469	C	P	P	C	L	N	I	F	L	C	P	P	H	Y	S	C	N	S	M	Y	S	C	P	P	C	1	4	4
470	C	P	P	C	L	S	E	T	G	C	H	D	P	T	T	C	L	T	S	L	P	C	P	P	C	1	4	4
471	C	P	P	C	L	I	I	F	N	C	N	F	I	F	F	C	Y	F	F	I	N	C	P	P	C	1	4	4
472	C	P	P	C	F	N	S	*	M	C	N	D	N	D	*	C	F	F	T	I	F	C	P	P	C	1	4	4
473	C	P	P	C	F	N	F	Y	I	C	N	N	H	S	F	C	S	I	N	F	F	C	P	P	C	1	4	4
474	C	P	P	C	F	M	R	K	F	C	T	V	R	R	L	C	L	Y	T	S	N	C	P	P	C	1	4	4
475	C	P	P	C	F	F	F	N	F	C	F	F	L	Y	L	C	F	Y	L	F	I	C	P	P	C	1	4	4
476	C	P	P	C	S	I	T	T	N	C	I	P	Q	S	S	C	W	Y	M	Q	P	C	P	P	C	3	10	3.33333
477	C	P	P	C	G	R	S	L	S	C	S	V	H	M	R	C	L	F	L	T	A	C	P	P	C	1	3	3
478	C	P	P	C	L	G	G	S	G	C	*	D	M	P	P	C	P	F	S	Q	S	C	P	P	C	1	3	3
479	C	P	P	C	N	N	N	*	I	C	L	Y	W	I	F	C	V	T	F	Y	T	C	P	P	C	1	3	3
480	C	P	P	C	N	L	*	I	Y	C	I	I	I	H	L	C	F	I	K	F	F	C	P	P	C	1	3	3
481	C	P	P	C	N	A	T	G	S	C	S	T	*	M	S	C	L	Y	D	L	Y	C	P	P	C	1	3	3
482	C	P	P	C	N	V	M	L	Y	C	F	N	M	F	N	C	N	I	T	I	T	C	P	P	C	1	3	3
483	C	P	P	C	N	Y	Y	I	L	C	Y	F	L	L	F	C	F	N	N	Y	F	C	P	P	C	1	3	3
484	C	P	P	C	T	T	M	*	L	C	L	G	Y	R	F	C	S	F	V	K	I	C	P	P	C	1	3	3
485	C	P	P	C	T	I	P	P	A	C	L	R	S	L	L	C	T	H	A	G	E	C	P	P	C	1	3	3
486	C	P	P	C	T	N	L	F	I	C	N	N	N	H	R	C	I	Y	F	D	P	C	P	P	C	1	3	3
487	C	P	P	C	T	S	M	L	R	C	H	P	Q	R	V	C	N	T	F	L	T	C	P	P	C	1	3	3
488	C	P	P	C	R	N	W	V	R	C	*	R	Q	K	R	C	Y	L	V	N	S	C	P	P	C	1	3	3
489	C	P	P	C	R	M	Y	N	L	C	F	N	L	N	*	C	F	K	L	Y	F	C	P	P	C	1	3	3
490	C	P	P	C	R	H	N	*	F	C	N	Y	N	I	H	C	I	L	M	N	H	C	P	P	C	1	3	3
491	C	P	P	C	R	P	W	S	L	C	Y	I	P	T	R	C	*	S	Q	N	H	C	P	P	C	1	3	3
492	C	P	P	C	R	R	I	I	L	C	V	Q	E	T	S	C	Y	I	L	L	T	C	P	P	C	1	3	3
493	C	P	P	C	R	E	F	R	V	C	R	S	W	L	T	C	Y	N	S	I	T	C	P	P	C	1	3	3
494	C	P	P	C	R	G	Y	T	L	C	P	S	K	A	Y	C	V	V	A	M	T	C	P	P	C	1	3	3
495	C	P	P	C	S	K	Y	W	R	C	I	S	Q	L	I	C	M	F	G	R	F	C	P	P	C	1	3	3
496	C	P	P	C	S	I	N	L	F	C	L	I	N	S	T	C	N	F	I	I	D	C	P	P	C	1	3	3
497	C	P	P	C	S	I	E	S	Y	C	L	T	N	M	T	C	Q	I	I	S	D	C	P	P	C	1	3	3
498	C	P	P	C	S	H	E	N	A	C	L	S	K	K	A	C	N	D	F	K	Y	C	P	P	C	1	3	3
499	C	P	P	C	S	H	L	Y	N	C	H	Y	K	F	N	C	Y	F	I	N	F	C	P	P	C	1	3	3
500	C	P	P	C	S	L	S	R	T	C	L	A	R	Q	S	C	I	Y	L	P	S	C	P	P	C	1	3	3
501	C	P	P	C	M	Y	M	K	G	C	F	N	F	N	K	C	I	F	H	Y	*	C	P	P	C	1	3	3
502	C	P	P	C	I	T	P	T	K	C	T	I	Y	R	Y	C	K	T	N	I	Y	C	P	P	C	1	3	3
503	C	P	P	C	I	L	N	S	S	C	Y	H	S	T	L	C	Y	N	L	Y	D	C	P	P	C	1	3	3
504	C	P	P	C	I	E	G	R	V	C	Q	L	T	*	D	C	S	R	L	S	L	C	P	P	C	1	3	3
505	C	P	P	C	I	*	N	F	G	C	Y	I	I	I	F	C	N	I	L	Y	S	C	P	P	C	1	3	3
506	C	P	P	C	I	Y	Y	N	T	C	A	I	L	S	R	C	F	I	S	*	Y	C	P	P	C	1	3	3
507	C	P	P	C	I	Y	Y	F	N	C	T	S	L	S	T	C	N	I	V	Y	M	C	P	P	C	1	3	3
508	C	P	P	C	Q	R	K	F	Q	C	H	S	I	S	Y	C	R	I	L	L	V	C	P	P	C	1	3	3
509	C	P	P	C	Q	G	H	H	Y	C	Y	L	H	S	T	C	*	Y	S	Y	Q	C	P	P	C	1	3	3
510	C	P	P	C	H	N	*	Y	*	C	R	V	L	L	S	C	I	Y	W	M	T	C	P	P	C	1	3	3
511	C	P	P	C	H	N	Y	K	N	C	Y	V	K	I	I	C	N	G	N	F	N	C	P	P	C	1	3	3
512	C	P	P	C	H	G	N	F	T	C	L	D	I	M	I	C	K	N	Y	I	N	C	P	P	C	1	3	3
513	C	P	P	C	P	N	D	N	L	C	F	Y	I	*	I	C	N	I	L	F	Y	C	P	P	C	1	3	3
514	C	P	P	C	P	Q	P	L	H	C	F	D	I	N	K	C	N	F	T	P	I	C	P	P	C	1	3	3
515	C	P	P	C	P	Q	E	K	R	C	I	S	P	F	L	C	L	Y	L	P	S	C	P	P	C	1	3	3
516	C	P	P	C	P	S	Q	V	F	C	T	L	K	E	Y	C	S	W	P	Y	V	C	P	P	C	1	3	3
517	C	P	P	C	P	L	K	M	P	C	N	Y	F	N	M	C	S	S	I	N	T	C	P	P	C	1	3	3
518	C	P	P	C	P	R	V	I	Y	C	S	T	N	T	P	C	T	I	Y	L	T	C	P	P	C	1	3	3
519	C	P	P	C	R	S	M	E	S	C	L	H	V	H	R	C	Y	G	H	N	T	C	P	P	C	1	3	3
520	C	P	P	C	R	S	G	A	S	C	W	L	I	*	L	C	G	S	S	D	L	C	P	P	C	1	3	3
521	C	P	P	C	R	N	N	L	L	C	S	I	T	P	P	C	T	Y	F	I	L	C	P	P	C	1	3	3
522	C	P	P	C	R	D	F	V	G	C	A	N	M	V	G	C	F	Y	H	T	S	C	P	P	C	1	3	3
523	C	P	P	C	R	V	F	I	F	C	N	Y	I	H	Y	C	F	T	Y	I	L	C	P	P	C	1	3	3
524	C	P	P	C	L	N	Y	E	L	C	L	S	Y	N	L	C	S	R	K	N	F	C	P	P	C	1	3	3
525	C	P	P	C	L	N	Y	D	L	C	L	S	Y	N	L	C	S	R	T	N	F	C	P	P	C	1	3	3
526	C	P	P	C	L	L	*	E	K	C	F	Y	T	F	V	C	Y	T	I	N	S	C	P	P	C	1	3	3
527	C	P	P	C	L	G	T	R	K	C	T	D	L	H	Q	C	A	I	L	N	A	C	P	P	C	1	3	3
528	C	P	P	C	L	I	L	*	I	C	E	M	I	S	H	C	V	S	F	I	S	C	P	P	C	1	3	3
529	C	P	P	C	L	P	E	P	F	C	V	T	Y	V	Y	C	Y	F	N	H	T	C	P	P	C	1	3	3
530	C	P	P	C	L	S	P	T	L	C	G	L	R	R	R	C	V	R	S	I	R	C	P	P	C	1	3	3
531	C	P	P	C	E	K	I	M	E	C	D	L	S	P	H	C	I	S	M	L	H	C	P	P	C	1	3	3
532	C	P	P	C	E	K	I	Y	P	C	K	F	S	P	T	C	K	S	K	T	T	C	P	P	C	1	3	3
533	C	P	P	C	E	T	V	D	I	C	L	Q	P	T	Y	C	S	W	L	R	M	C	P	P	C	1	3	3
534	C	P	P	C	E	I	N	F	I	C	N	I	G	T	T	C	L	N	F	T	F	C	P	P	C	1	3	3
535	C	P	P	C	E	F	N	Y	S	C	F	M	L	F	L	C	I	I	F	F	Y	C	P	P	C	1	3	3
536	C	P	P	C	D	H	P	Q	Q	C	G	S	P	L	P	C	F	*	H	S	I	C	P	P	C	1	3	3
537	C	P	P	C	D	P	F	F	L	C	Q	F	*	T	L	C	S	H	I	I	I	C	P	P	C	1	3	3
538	C	P	P	C	D	R	E	V	E	C	Y	R	T	Y	N	C	P	M	P	L	S	C	P	P	C	1	3	3
539	C	P	P	C	D	L	T	S	L	C	Y	L	N	N	V	C	Y	F	F	Y	M	C	P	P	C	1	3	3
540	C	P	P	C	D	L	D	K	N	C	A	T	P	K	S	C	V	P	I	S	I	C	P	P	C	1	3	3
541	C	P	P	C	D	G	D	I	I	C	Y	T	T	S	Q	C	I	T	S	L	Y	C	P	P	C	1	3	3
542	C	P	P	C	A	S	A	Y	L	C	Y	Y	P	L	D	C	M	I	Q	N	F	C	P	P	C	1	3	3
543	C	P	P	C	A	P	M	W	P	C	S	N	P	I	W	C	Y	Y	I	F	K	C	P	P	C	1	3	3
544	C	P	P	C	A	L	R	S	G	C	R	N	M	N	S	C	M	L	R	H	P	C	P	P	C	1	3	3
545	C	P	P	C	G	N	F	L	R	C	N	S	K	P	E	C	N	P	H	S	F	C	P	P	C	1	3	3
546	C	P	P	C	G	V	F	R	I	C	D	N	T	S	K	C	S	S	M	I	A	C	P	P	C	1	3	3
547	C	P	P	C	G	I	V	D	I	C	T	H	T	H	T	C	H	I	N	I	S	C	P	P	C	1	3	3
548	C	P	P	C	G	R	S	L	S	C	S	G	H	M	R	C	L	F	L	T	A	C	P	P	C	1	3	3
549	C	P	P	C	G	L	L	Q	W	C	L	G	N	H	T	C	S	D	S	H	S	C	P	P	C	1	3	3
550	C	P	P	C	V	V	S	E	G	C	A	N	I	S	W	C	L	Y	H	T	S	C	P	P	C	1	3	3
551	C	P	P	C	V	F	*	I	T	C	F	F	I	N	K	C	F	T	N	L	I	C	P	P	C	1	3	3
552	C	P	P	C	*	Y	M	L	Q	C	L	L	H	Y	E	C	M	Y	K	R	S	C	P	P	C	1	3	3
553	C	P	P	C	*	F	I	S	G	C	F	N	L	I	F	C	E	R	L	Y	S	C	P	P	C	1	3	3
554	C	P	P	C	Y	K	Y	S	N	C	S	G	L	T	A	C	Y	D	*	Y	Y	C	P	P	C	1	3	3
555	C	P	P	C	Y	R	I	I	Y	C	M	S	L	N	I	C	S	L	G	I	*	C	P	P	C	1	3	3
556	C	P	P	C	Y	V	R	D	S	C	R	I	I	F	W	C	G	F	V	S	*	C	P	P	C	1	3	3
557	C	P	P	C	Y	L	N	I	L	C	D	S	M	T	V	C	K	I	G	W	S	C	P	P	C	1	3	3
558	C	P	P	C	Y	F	R	D	S	C	R	L	I	F	W	C	G	F	V	S	*	C	P	P	C	1	3	3
559	C	P	P	C	Y	F	E	H	N	C	L	I	Q	N	A	C	N	N	S	N	F	C	P	P	C	1	3	3
560	C	P	P	C	S	R	S	T	P	C	L	I	K	I	H	C	L	N	P	K	I	C	P	P	C	1	3	3
561	C	P	P	C	S	T	I	G	D	C	L	T	Q	W	V	C	P	K	P	D	S	C	P	P	C	1	3	3
562	C	P	P	C	S	T	Q	S	M	C	H	I	P	A	S	C	L	L	T	P	L	C	P	P	C	1	3	3
563	C	P	P	C	S	Q	T	K	Q	C	V	F	T	K	Y	C	H	H	*	I	S	C	P	P	C	1	3	3
564	C	P	P	C	S	P	N	Y	L	C	P	Q	I	S	P	C	Y	I	N	S	S	C	P	P	C	1	3	3
565	C	P	P	C	S	L	P	S	L	C	S	N	K	Y	R	C	Y	T	L	L	F	C	P	P	C	1	3	3
566	C	P	P	C	S	D	H	F	M	C	N	L	S	H	L	C	T	V	T	Y	D	C	P	P	C	1	3	3
567	C	P	P	C	S	A	V	L	R	C	L	H	K	T	A	C	S	R	V	S	T	C	P	P	C	1	3	3
568	C	P	P	C	S	G	F	L	T	C	I	L	I	N	N	C	T	I	S	Y	P	C	P	P	C	1	3	3
569	C	P	P	C	S	Y	H	F	M	C	N	L	S	H	L	C	T	F	T	Y	D	C	P	P	C	1	3	3
570	C	P	P	C	S	S	D	S	F	C	Y	G	S	I	H	C	D	S	V	N	V	C	P	P	C	1	3	3
571	C	P	P	C	S	F	L	I	R	C	Y	T	N	S	Q	C	S	I	S	Y	L	C	P	P	C	1	3	3
572	C	P	P	C	W	K	L	K	S	C	N	Y	*	N	H	C	I	W	H	H	P	C	P	P	C	1	3	3
573	C	P	P	C	W	M	M	S	P	C	R	G	S	S	N	C	N	L	S	A	L	C	P	P	C	1	3	3
574	C	P	P	C	W	G	M	Y	R	C	L	T	L	I	N	C	Y	H	I	Q	P	C	P	P	C	1	3	3
575	C	P	P	C	W	S	L	G	G	C	D	A	L	S	N	C	I	L	N	T	T	C	P	P	C	1	3	3
576	C	P	P	C	W	S	W	Y	F	C	F	Y	F	*	N	C	N	H	L	N	N	C	P	P	C	1	3	3
577	C	P	P	C	L	M	V	I	N	C	V	I	W	H	H	C	I	Y	N	N	S	C	P	P	C	1	3	3
578	C	P	P	C	L	I	N	I	L	C	I	I	T	F	Q	C	L	Y	L	Y	Y	C	P	P	C	1	3	3
579	C	P	P	C	L	R	P	F	F	C	S	P	M	P	N	C	N	E	K	H	P	C	P	P	C	1	3	3
580	C	P	P	C	L	L	E	T	N	C	S	L	I	F	Q	C	N	F	I	P	N	C	P	P	C	1	3	3
581	C	P	P	C	F	N	N	H	L	C	L	N	L	Q	V	C	*	N	H	S	R	C	P	P	C	1	3	3
582	C	P	P	C	F	L	N	*	D	C	L	S	I	F	N	C	I	W	V	Y	F	C	P	P	C	1	3	3
583	C	P	P	C	F	*	N	L	F	C	F	N	Y	S	I	C	I	H	*	F	L	C	P	P	C	1	3	3
584	C	P	P	C	R	I	L	S	D	C	Q	M	L	F	R	C	A	V	D	F	F	C	P	P	C	1	3	3
585	C	P	P	C	L	F	I	I	Y	C	Y	H	I	H	N	C	Y	Y	Y	H	F	C	P	P	C	1	3	3
586	C	P	P	C	Y	F	R	D	S	C	R	I	I	F	W	C	G	F	V	S	*	C	P	P	C	1	3	3
587	C	P	P	C	L	P	H	P	L	C	L	T	Q	R	G	C	H	S	A	T	Q	C	P	P	C	2	5	2.5
588	C	P	P	C	R	S	S	V	T	C	S	H	M	I	T	C	Q	R	V	I	Y	C	P	P	C	3	7	2.33333
589	C	P	P	C	D	Y	R	M	R	C	L	I	K	H	Q	C	S	T	F	I	D	C	P	P	C	3	7	2.33333
590	C	P	P	C	S	I	H	T	*	C	F	N	L	Y	N	C	Y	F	I	F	I	C	P	P	C	3	6	2
591	C	P	P	C	D	F	S	N	A	C	H	R	*	I	S	C	I	F	W	F	L	C	P	P	C	2	4	2
592	C	P	P	C	S	T	G	E	S	C	L	Q	S	P	P	C	F	H	F	Q	S	C	P	P	C	2	4	2
593	C	P	P	C	T	I	F	F	I	C	Y	I	L	I	Y	C	L	F	N	N	S	C	P	P	C	1	2	2
594	C	P	P	C	K	T	K	A	R	C	S	R	L	V	R	C	H	*	N	P	D	C	P	P	C	1	2	2
595	C	P	P	C	K	I	L	S	T	C	N	Y	Y	F	Y	C	Y	N	I	L	L	C	P	P	C	1	2	2
596	C	P	P	C	K	H	G	H	N	C	S	N	F	N	V	C	A	W	Q	Q	Y	C	P	P	C	1	2	2
597	C	P	P	C	K	P	I	V	N	C	K	S	H	*	T	C	F	Y	L	T	N	C	P	P	C	1	2	2
598	C	P	P	C	K	Y	L	F	E	C	F	T	S	F	M	C	I	P	V	R	T	C	P	P	C	1	2	2
599	C	P	P	C	N	N	F	K	L	C	G	N	M	L	S	C	S	S	H	V	I	C	P	P	C	1	2	2
600	C	P	P	C	N	T	P	L	P	C	H	W	L	W	T	C	S	T	T	S	I	C	P	P	C	1	2	2
601	C	P	P	C	N	M	L	F	L	C	S	D	F	L	I	C	F	I	H	N	I	C	P	P	C	1	2	2
602	C	P	P	C	N	I	F	S	Y	C	Y	N	K	L	W	C	F	I	I	K	K	C	P	P	C	1	2	2
603	C	P	P	C	N	H	L	V	T	C	P	S	S	S	F	C	Q	N	L	D	N	C	P	P	C	1	2	2
604	C	P	P	C	N	L	Y	R	*	C	F	S	F	T	I	C	Y	N	Y	H	T	C	P	P	C	1	2	2
605	C	P	P	C	N	G	A	V	W	C	V	E	T	L	T	C	D	D	G	V	N	C	P	P	C	1	2	2
606	C	P	P	C	N	Y	N	T	S	C	K	H	F	L	I	C	Y	F	Q	N	N	C	P	P	C	1	2	2
607	C	P	P	C	N	Y	A	S	L	C	Y	F	F	I	S	C	I	F	Y	M	I	C	P	P	C	1	2	2
608	C	P	P	C	T	N	V	R	P	C	L	T	Y	I	T	C	N	S	N	D	S	C	P	P	C	1	2	2
609	C	P	P	C	T	N	Y	*	H	C	S	N	S	R	L	C	T	T	I	Q	K	C	P	P	C	1	2	2
610	C	P	P	C	T	M	Q	D	L	C	S	L	T	L	G	C	I	Y	K	R	L	C	P	P	C	1	2	2
611	C	P	P	C	T	I	S	R	G	C	N	D	L	L	M	C	G	H	Y	I	T	C	P	P	C	1	2	2
612	C	P	P	C	T	L	V	S	Y	C	F	F	R	I	P	C	I	Y	F	*	H	C	P	P	C	1	2	2
613	C	P	P	C	T	D	R	M	*	C	A	W	K	S	T	C	K	T	Q	T	S	C	P	P	C	1	2	2
614	C	P	P	C	T	I	L	G	P	C	H	F	K	L	N	C	T	H	D	L	V	C	P	P	C	1	2	2
615	C	P	P	C	T	H	I	F	H	C	F	H	I	T	N	C	L	F	N	N	N	C	P	P	C	1	2	2
616	C	P	P	C	T	L	A	V	F	C	N	N	N	S	A	C	R	S	S	N	S	C	P	P	C	1	2	2
617	C	P	P	C	T	V	V	S	N	C	T	M	N	I	L	C	H	T	Q	I	F	C	P	P	C	1	2	2
618	C	P	P	C	T	V	A	S	P	C	Y	N	P	N	T	C	N	I	T	I	Q	C	P	P	C	1	2	2
619	C	P	P	C	T	L	L	F	Y	C	T	L	N	I	M	C	F	Y	N	I	P	C	P	P	C	1	2	2
620	C	P	P	C	R	N	W	A	R	C	*	R	Q	K	R	C	Y	L	V	N	S	C	P	P	C	1	2	2
621	C	P	P	C	R	T	D	L	I	C	D	E	F	I	K	C	P	M	S	H	F	C	P	P	C	1	2	2
622	C	P	P	C	R	R	R	P	G	C	L	I	I	L	S	C	*	R	Q	K	P	C	P	P	C	1	2	2
623	C	P	P	C	R	G	G	D	P	C	M	P	P	I	M	C	S	Y	S	F	K	C	P	P	C	1	2	2
624	C	P	P	C	R	F	N	F	V	C	H	W	I	D	L	C	P	S	F	P	P	C	P	P	C	1	2	2
625	C	P	P	C	S	K	H	L	T	C	F	R	F	S	*	C	I	S	T	D	H	C	P	P	C	1	2	2
626	C	P	P	C	S	T	Q	I	L	C	I	T	M	Y	G	C	T	K	K	F	G	C	P	P	C	1	2	2
627	C	P	P	C	S	T	F	T	F	C	L	N	F	N	I	C	V	M	F	A	Q	C	P	P	C	1	2	2
628	C	P	P	C	S	S	L	N	K	C	I	R	S	G	A	C	V	S	S	E	L	C	P	P	C	1	2	2
629	C	P	P	C	S	S	E	S	D	C	S	*	M	Q	V	C	L	L	R	H	N	C	P	P	C	1	2	2
630	C	P	P	C	S	S	Y	N	F	C	F	I	N	Y	P	C	F	F	Y	I	T	C	P	P	C	1	2	2
631	C	P	P	C	S	I	L	G	P	C	H	F	N	L	N	C	T	H	D	L	V	C	P	P	C	1	2	2
632	C	P	P	C	S	R	G	M	N	C	G	S	L	R	L	C	H	F	R	*	S	C	P	P	C	1	2	2
633	C	P	P	C	S	G	R	Y	W	C	Y	L	K	P	Y	C	F	F	I	N	L	C	P	P	C	1	2	2
634	C	P	P	C	S	S	N	T	M	C	L	S	L	R	L	C	H	R	S	T	M	C	P	P	C	1	2	2
635	C	P	P	C	S	S	*	I	I	C	Y	D	S	I	N	C	F	H	Y	Y	Y	C	P	P	C	1	2	2
636	C	P	P	C	S	W	P	M	S	C	E	F	L	T	T	C	V	R	D	L	I	C	P	P	C	1	2	2
637	C	P	P	C	S	L	P	F	S	C	N	V	S	Y	K	C	S	N	P	S	F	C	P	P	C	1	2	2
638	C	P	P	C	M	N	H	R	N	C	N	F	L	I	S	C	L	Y	L	H	W	C	P	P	C	1	2	2
639	C	P	P	C	M	I	F	I	F	C	L	F	S	F	H	C	F	Y	Y	L	I	C	P	P	C	1	2	2
640	C	P	P	C	M	P	N	A	G	C	L	Y	L	T	T	C	S	G	G	R	H	C	P	P	C	1	2	2
641	C	P	P	C	M	D	P	E	I	C	N	V	R	T	V	C	F	Y	H	L	N	C	P	P	C	1	2	2
642	C	P	P	C	M	D	P	E	I	C	N	F	R	T	A	C	F	Y	H	L	N	C	P	P	C	1	2	2
643	C	P	P	C	M	D	P	E	I	C	N	F	R	T	V	C	F	Y	H	F	N	C	P	P	C	1	2	2
644	C	P	P	C	I	N	I	*	S	C	N	D	*	Y	V	C	D	L	N	I	V	C	P	P	C	1	2	2
645	C	P	P	C	I	T	H	M	S	C	E	S	Y	K	Y	C	N	L	I	I	K	C	P	P	C	1	2	2
646	C	P	P	C	I	T	T	M	H	C	N	H	T	L	Y	C	N	N	I	I	L	C	P	P	C	1	2	2
647	C	P	P	C	I	I	*	Q	I	C	R	H	S	V	D	C	Y	F	I	L	R	C	P	P	C	1	2	2
648	C	P	P	C	I	H	I	I	N	C	I	Y	P	H	I	C	Y	Y	F	N	N	C	P	P	C	1	2	2
649	C	P	P	C	I	H	S	P	V	C	H	T	M	T	*	C	T	Y	L	V	S	C	P	P	C	1	2	2
650	C	P	P	C	I	L	N	S	S	C	S	H	S	T	L	C	Y	N	L	D	D	C	P	P	C	1	2	2
651	C	P	P	C	I	L	H	*	F	C	T	N	I	Y	Y	C	S	I	M	R	S	C	P	P	C	1	2	2
652	C	P	P	C	I	E	L	R	L	C	L	N	H	I	N	C	F	N	E	T	N	C	P	P	C	1	2	2
653	C	P	P	C	I	E	F	N	I	C	I	I	S	I	T	C	N	I	H	L	D	C	P	P	C	1	2	2
654	C	P	P	C	I	D	S	R	H	C	T	F	P	H	W	C	F	T	V	D	Y	C	P	P	C	1	2	2
655	C	P	P	C	I	*	T	F	V	C	Y	I	I	I	F	C	N	I	L	Y	S	C	P	P	C	1	2	2
656	C	P	P	C	I	Y	N	I	H	C	F	H	L	S	L	C	Y	F	F	F	S	C	P	P	C	1	2	2
657	C	P	P	C	I	S	I	*	F	C	I	Y	F	S	F	C	L	Y	Y	I	F	C	P	P	C	1	2	2
658	C	P	P	C	I	W	S	I	M	C	Y	D	T	Q	I	C	T	N	S	T	N	C	P	P	C	1	2	2
659	C	P	P	C	I	F	N	*	I	C	N	N	N	*	N	C	F	Y	N	Y	Y	C	P	P	C	1	2	2
660	C	P	P	C	I	F	Y	*	I	C	I	Y	F	N	I	C	Y	I	H	F	H	C	P	P	C	1	2	2
661	C	P	P	C	Q	R	R	I	*	C	V	T	H	N	L	C	S	N	F	W	F	C	P	P	C	1	2	2
662	C	P	P	C	Q	I	V	T	N	C	T	N	L	S	T	C	E	L	P	N	H	C	P	P	C	1	2	2
663	C	P	P	C	Q	D	R	F	H	C	V	F	P	*	G	C	F	A	P	S	W	C	P	P	C	1	2	2
664	C	P	P	C	Q	A	I	I	K	C	S	I	Q	S	K	C	N	L	S	N	S	C	P	P	C	1	2	2
665	C	P	P	C	Q	S	R	N	Y	C	S	V	I	Y	I	C	T	I	Y	D	M	C	P	P	C	1	2	2
666	C	P	P	C	H	N	L	N	Y	C	T	S	I	I	S	C	F	I	W	N	H	C	P	P	C	1	2	2
667	C	P	P	C	H	T	P	A	H	C	F	S	L	R	F	C	R	H	V	A	S	C	P	P	C	1	2	2
668	C	P	P	C	H	T	F	T	N	C	T	T	S	I	I	C	Y	S	Y	L	N	C	P	P	C	1	2	2
669	C	P	P	C	H	S	L	F	L	C	H	*	I	A	V	C	L	K	F	N	N	C	P	P	C	1	2	2
670	C	P	P	C	H	M	K	N	P	C	R	N	P	W	I	C	P	N	L	I	L	C	P	P	C	1	2	2
671	C	P	P	C	H	D	N	F	Y	C	I	N	S	F	I	C	N	I	*	F	N	C	P	P	C	1	2	2
672	C	P	P	C	H	V	E	R	A	C	S	Y	I	L	D	C	*	W	R	H	S	C	P	P	C	1	2	2
673	C	P	P	C	H	Y	A	Y	A	C	L	A	I	P	K	C	I	Y	S	Y	N	C	P	P	C	1	2	2
674	C	P	P	C	H	F	N	T	F	C	S	N	P	M	R	C	N	Y	F	N	N	C	P	P	C	1	2	2
675	C	P	P	C	H	F	N	F	N	C	I	I	F	N	*	C	*	N	I	F	F	C	P	P	C	1	2	2
676	C	P	P	C	P	N	I	Y	Q	C	N	V	K	I	S	C	N	L	L	H	L	C	P	P	C	1	2	2
677	C	P	P	C	P	M	L	D	S	C	T	T	M	S	S	C	Y	P	H	T	A	C	P	P	C	1	2	2
678	C	P	P	C	P	I	D	F	P	C	F	N	S	R	G	C	N	I	I	I	S	C	P	P	C	1	2	2
679	C	P	P	C	P	R	I	P	P	C	Q	K	S	Q	A	C	V	W	D	L	M	C	P	P	C	1	2	2
680	C	P	P	C	P	L	K	T	H	C	N	Y	F	N	M	C	S	S	I	N	T	C	P	P	C	1	2	2
681	C	P	P	C	P	L	K	M	Q	C	N	Y	F	N	M	C	S	S	I	N	T	C	P	P	C	1	2	2
682	C	P	P	C	P	L	K	M	H	C	N	Y	F	K	M	C	S	S	I	N	T	C	P	P	C	1	2	2
683	C	P	P	C	P	L	K	M	H	C	N	Y	F	N	M	C	S	S	S	N	T	C	P	P	C	1	2	2
684	C	P	P	C	P	L	K	M	H	C	N	Y	F	N	I	C	S	S	I	N	T	C	P	P	C	1	2	2
685	C	P	P	C	P	T	Q	D	I	C	L	Y	Q	L	R	C	N	N	L	N	N	C	P	P	C	1	2	2
686	C	P	P	C	P	P	H	*	I	C	N	S	R	G	S	C	F	F	L	F	Y	C	P	P	C	1	2	2
687	C	P	P	C	P	R	V	R	Y	C	E	N	F	S	L	C	Y	L	D	L	L	C	P	P	C	1	2	2
688	C	P	P	C	P	L	Y	Y	I	C	Y	L	Y	Y	N	C	Y	V	F	S	Q	C	P	P	C	1	2	2
689	C	P	P	C	P	L	Y	Y	R	C	Y	G	Y	T	S	C	N	Y	T	N	L	C	P	P	C	1	2	2
690	C	P	P	C	P	Y	Y	M	F	C	I	N	N	N	Y	C	F	F	H	F	I	C	P	P	C	1	2	2
691	C	P	P	C	P	S	Q	L	Y	C	H	H	M	F	L	C	S	H	N	I	I	C	P	P	C	1	2	2
692	C	P	P	C	P	F	T	L	H	C	F	N	L	S	P	C	I	N	P	N	P	C	P	P	C	1	2	2
693	C	P	P	C	R	R	P	F	R	C	V	N	R	N	Y	C	L	R	K	N	D	C	P	P	C	1	2	2
694	C	P	P	C	R	S	F	R	L	C	Y	R	V	K	S	C	T	P	D	N	Y	C	P	P	C	1	2	2
695	C	P	P	C	R	V	I	F	G	C	K	A	P	S	T	C	T	*	Y	K	S	C	P	P	C	1	2	2
696	C	P	P	C	R	*	F	I	G	C	H	V	R	F	R	C	I	L	I	D	N	C	P	P	C	1	2	2
697	C	P	P	C	R	T	L	Q	S	C	V	M	L	H	S	C	S	N	N	S	S	C	P	P	C	1	2	2
698	C	P	P	C	R	I	P	N	L	C	T	I	T	L	A	C	I	R	L	L	T	C	P	P	C	1	2	2
699	C	P	P	C	R	Q	Y	Q	V	C	*	T	S	Y	S	C	T	Y	R	N	T	C	P	P	C	1	2	2
700	C	P	P	C	R	H	S	*	I	C	H	L	P	S	L	C	F	I	I	Y	Q	C	P	P	C	1	2	2
701	C	P	P	C	R	H	L	R	M	C	T	H	I	R	E	C	G	M	S	H	G	C	P	P	C	1	2	2
702	C	P	P	C	R	P	P	R	R	C	Y	M	V	S	Y	C	G	V	T	S	T	C	P	P	C	1	2	2
703	C	P	P	C	R	L	T	R	Y	C	P	Y	M	Q	*	C	L	L	*	F	N	C	P	P	C	1	2	2
704	C	P	P	C	R	G	A	P	R	C	L	V	M	K	L	C	T	I	*	P	V	C	P	P	C	1	2	2
705	C	P	P	C	R	G	L	M	F	C	I	T	N	*	H	C	*	Y	F	Y	F	C	P	P	C	1	2	2
706	C	P	P	C	R	Y	D	T	N	C	H	F	*	Y	F	C	I	H	L	Y	N	C	P	P	C	1	2	2
707	C	P	P	C	R	W	G	R	W	C	P	Y	*	E	V	C	T	W	Q	R	G	C	P	P	C	1	2	2
708	C	P	P	C	L	T	P	M	Q	C	*	W	L	R	I	C	*	F	P	S	S	C	P	P	C	1	2	2
709	C	P	P	C	L	T	P	L	H	C	*	W	L	R	I	C	*	F	P	S	S	C	P	P	C	1	2	2
710	C	P	P	C	L	T	R	F	L	C	R	S	N	S	A	C	N	S	Y	*	Y	C	P	P	C	1	2	2
711	C	P	P	C	L	S	I	Y	N	C	K	S	L	S	R	C	I	I	M	Y	M	C	P	P	C	1	2	2
712	C	P	P	C	L	S	D	S	N	C	L	Y	R	N	L	C	N	I	K	N	K	C	P	P	C	1	2	2
713	C	P	P	C	L	G	M	P	R	C	A	P	P	A	S	C	D	S	Q	M	P	C	P	P	C	1	2	2
714	C	P	P	C	L	N	K	S	I	C	I	S	N	P	T	C	Y	S	Y	Y	F	C	P	P	C	1	2	2
715	C	P	P	C	L	N	I	S	K	C	Y	F	Y	S	H	C	N	V	I	Y	F	C	P	P	C	1	2	2
716	C	P	P	C	L	S	P	P	W	C	L	E	K	I	Q	C	R	R	I	Y	R	C	P	P	C	1	2	2
717	C	P	P	C	L	S	E	V	G	C	H	P	K	V	F	C	D	V	A	S	T	C	P	P	C	1	2	2
718	C	P	P	C	L	P	P	V	T	C	V	I	S	P	R	C	N	W	W	H	H	C	P	P	C	1	2	2
719	C	P	P	C	L	R	R	L	D	C	Y	F	Q	S	P	C	M	N	L	S	Y	C	P	P	C	1	2	2
720	C	P	P	C	L	L	S	P	V	C	K	S	I	S	I	C	L	S	M	N	*	C	P	P	C	1	2	2
721	C	P	P	C	L	E	W	S	I	C	M	Y	F	H	Q	C	L	P	D	Y	V	C	P	P	C	1	2	2
722	C	P	P	C	L	D	I	T	I	C	S	I	I	N	T	C	S	N	I	D	N	C	P	P	C	1	2	2
723	C	P	P	C	L	D	L	R	T	C	L	F	R	N	I	C	S	N	T	A	V	C	P	P	C	1	2	2
724	C	P	P	C	L	*	G	G	I	C	L	S	G	F	L	C	S	N	F	E	S	C	P	P	C	1	2	2
725	C	P	P	C	L	Y	F	A	F	C	T	T	H	F	Y	C	*	F	E	N	F	C	P	P	C	1	2	2
726	C	P	P	C	L	S	T	T	A	C	Q	S	P	Y	K	C	F	F	D	R	I	C	P	P	C	1	2	2
727	C	P	P	C	L	S	P	T	L	C	G	L	R	R	R	C	A	R	S	S	R	C	P	P	C	1	2	2
728	C	P	P	C	L	S	P	T	L	C	G	L	R	R	R	C	A	R	S	L	R	C	P	P	C	1	2	2
729	C	P	P	C	L	S	A	I	L	C	I	I	I	M	T	C	F	Y	I	N	L	C	P	P	C	1	2	2
730	C	P	P	C	L	L	M	S	S	C	N	L	T	Q	Q	C	M	S	I	Y	P	C	P	P	C	1	2	2
731	C	P	P	C	L	L	M	S	S	C	N	L	T	H	Q	C	M	I	I	Y	P	C	P	P	C	1	2	2
732	C	P	P	C	E	T	I	Y	G	C	L	L	S	S	L	C	A	N	V	Q	Y	C	P	P	C	1	2	2
733	C	P	P	C	E	T	V	V	R	C	Y	T	S	N	L	C	H	V	Q	N	I	C	P	P	C	1	2	2
734	C	P	P	C	E	H	N	V	M	C	I	Y	F	Y	Q	C	H	N	S	S	N	C	P	P	C	1	2	2
735	C	P	P	C	E	P	P	Y	L	C	T	Y	R	F	S	C	R	F	*	Y	I	C	P	P	C	1	2	2
736	C	P	P	C	E	E	N	I	S	C	P	F	Q	F	A	C	W	R	T	*	A	C	P	P	C	1	2	2
737	C	P	P	C	E	F	S	A	L	C	R	D	I	L	G	C	L	N	N	P	T	C	P	P	C	1	2	2
738	C	P	P	C	D	N	T	N	L	C	L	S	E	F	F	C	T	Y	A	I	V	C	P	P	C	1	2	2
739	C	P	P	C	D	I	L	I	P	C	P	Q	R	N	S	C	H	Q	A	L	N	C	P	P	C	1	2	2
740	C	P	P	C	D	Q	F	T	V	C	N	I	N	P	F	C	T	Y	Q	I	H	C	P	P	C	1	2	2
741	C	P	P	C	D	Y	T	L	I	C	Y	D	P	H	I	C	F	Y	H	H	H	C	P	P	C	1	2	2
742	C	P	P	C	D	Y	Q	F	H	C	L	Y	K	L	R	C	L	D	A	F	L	C	P	P	C	1	2	2
743	C	P	P	C	A	N	A	F	F	C	S	F	H	H	T	C	N	Y	A	L	L	C	P	P	C	1	2	2
744	C	P	P	C	A	D	L	G	L	C	T	Y	*	S	Q	C	I	F	V	N	*	C	P	P	C	1	2	2
745	C	P	P	C	A	P	M	W	P	C	S	N	P	S	W	C	S	Y	I	F	K	C	P	P	C	1	2	2
746	C	P	P	C	A	R	G	P	H	C	W	Q	H	P	W	C	M	L	S	*	K	C	P	P	C	1	2	2
747	C	P	P	C	A	G	E	G	W	C	I	K	S	S	A	C	Q	A	D	L	S	C	P	P	C	1	2	2
748	C	P	P	C	A	Y	H	R	Y	C	P	Y	L	K	L	C	S	F	L	E	N	C	P	P	C	1	2	2
749	C	P	P	C	G	S	P	Q	W	C	S	I	M	G	R	C	A	L	H	L	K	C	P	P	C	1	2	2
750	C	P	P	C	G	P	S	L	I	C	A	V	R	E	S	C	E	D	A	S	G	C	P	P	C	1	2	2
751	C	P	P	C	G	R	L	A	L	C	N	Q	K	T	I	C	D	F	N	P	T	C	P	P	C	1	2	2
752	C	P	P	C	G	D	Y	H	S	C	Y	I	L	T	L	C	F	Y	K	T	L	C	P	P	C	1	2	2
753	C	P	P	C	G	V	Y	L	L	C	F	S	M	I	I	C	F	F	L	M	H	C	P	P	C	1	2	2
754	C	P	P	C	G	N	L	R	Y	C	L	N	*	I	L	C	L	K	*	L	F	C	P	P	C	1	2	2
755	C	P	P	C	G	I	Q	H	W	C	L	S	T	T	S	C	A	L	Y	F	R	C	P	P	C	1	2	2
756	C	P	P	C	G	I	Q	H	W	C	L	S	T	T	S	C	A	L	Y	F	L	C	P	P	C	1	2	2
757	C	P	P	C	G	I	Q	H	W	C	L	S	T	T	S	C	A	L	Y	F	R	C	P	P	C	1	2	2
758	C	P	P	C	G	R	S	L	R	C	S	V	H	M	R	C	L	F	L	T	A	C	P	P	C	1	2	2
759	C	P	P	C	G	G	S	N	L	C	N	F	R	P	F	C	S	N	Q	H	I	C	P	P	C	1	2	2
760	C	P	P	C	V	M	L	E	R	C	Y	S	S	T	G	C	Y	S	T	D	H	C	P	P	C	1	2	2
761	C	P	P	C	V	P	P	Q	H	C	L	S	P	W	R	C	S	N	N	F	N	C	P	P	C	1	2	2
762	C	P	P	C	V	R	L	P	L	C	L	A	G	L	R	C	H	S	K	T	T	C	P	P	C	1	2	2
763	C	P	P	C	V	*	K	T	L	C	L	Q	S	N	S	C	F	S	I	G	I	C	P	P	C	1	2	2
764	C	P	P	C	V	F	V	Y	S	C	H	R	P	L	F	C	L	*	M	R	H	C	P	P	C	1	2	2
765	C	P	P	C	V	I	A	P	N	C	H	Y	I	S	L	C	I	T	L	H	*	C	P	P	C	1	2	2
766	C	P	P	C	V	S	F	L	N	C	N	N	T	H	L	C	T	T	L	K	T	C	P	P	C	1	2	2
767	C	P	P	C	*	N	D	T	W	C	I	P	L	H	H	C	F	F	H	*	M	C	P	P	C	1	2	2
768	C	P	P	C	*	I	T	V	F	C	L	N	F	Y	F	C	I	F	F	I	Y	C	P	P	C	1	2	2
769	C	P	P	C	*	I	F	Y	F	C	Y	N	T	N	S	C	Y	Y	Y	N	H	C	P	P	C	1	2	2
770	C	P	P	C	*	R	T	L	R	C	P	I	L	I	H	C	T	R	S	L	L	C	P	P	C	1	2	2
771	C	P	P	C	*	A	R	M	Y	C	W	N	I	F	R	C	I	S	S	K	I	C	P	P	C	1	2	2
772	C	P	P	C	*	F	S	V	H	C	Y	T	Y	S	I	C	S	S	L	N	R	C	P	P	C	1	2	2
773	C	P	P	C	*	F	S	V	H	C	Y	T	Y	S	I	C	S	S	F	N	R	C	P	P	C	1	2	2
774	C	P	P	C	Y	I	N	L	I	C	L	F	V	M	I	C	F	Y	F	T	N	C	P	P	C	1	2	2
775	C	P	P	C	Y	I	N	F	I	C	L	V	V	M	I	C	F	Y	F	T	N	C	P	P	C	1	2	2
776	C	P	P	C	Y	I	Y	I	F	C	I	L	Y	I	F	C	L	I	Y	F	Y	C	P	P	C	1	2	2
777	C	P	P	C	Y	Q	D	M	L	C	N	F	T	T	D	C	F	I	S	N	H	C	P	P	C	1	2	2
778	C	P	P	C	Y	H	H	F	I	C	Y	I	Y	Y	S	C	I	N	N	F	F	C	P	P	C	1	2	2
779	C	P	P	C	Y	H	Y	N	F	C	P	H	P	T	F	C	Y	I	H	M	L	C	P	P	C	1	2	2
780	C	P	P	C	Y	R	I	A	S	C	H	D	*	F	N	C	F	S	V	L	L	C	P	P	C	1	2	2
781	C	P	P	C	Y	L	Y	D	F	C	I	I	P	F	L	C	H	S	F	F	Y	C	P	P	C	1	2	2
782	C	P	P	C	Y	Y	D	S	A	C	I	S	Y	T	I	C	Y	I	I	N	I	C	P	P	C	1	2	2
783	C	P	P	C	Y	S	G	M	L	C	P	I	F	F	L	C	L	I	L	M	L	C	P	P	C	1	2	2
784	C	P	P	C	Y	F	R	D	R	C	R	I	I	F	W	C	G	F	V	S	*	C	P	P	C	1	2	2
785	C	P	P	C	Y	F	H	T	*	C	S	P	S	N	N	C	Y	Y	S	N	L	C	P	P	C	1	2	2
786	C	P	P	C	Y	F	F	I	F	C	N	I	S	F	Y	C	T	Y	I	H	Y	C	P	P	C	1	2	2
787	C	P	P	C	S	N	I	I	Y	C	F	N	Y	N	T	C	N	S	K	N	Y	C	P	P	C	1	2	2
788	C	P	P	C	S	T	M	L	Y	C	Y	N	R	L	N	C	N	H	*	Y	L	C	P	P	C	1	2	2
789	C	P	P	C	S	I	N	N	S	C	S	N	L	T	T	C	L	N	N	H	I	C	P	P	C	1	2	2
790	C	P	P	C	S	G	A	D	T	C	P	S	M	Y	Y	C	W	I	S	I	V	C	P	P	C	1	2	2
791	C	P	P	C	S	Y	T	F	L	C	H	H	N	Y	Y	C	Y	H	I	I	H	C	P	P	C	1	2	2
792	C	P	P	C	S	F	F	I	T	C	S	V	F	M	A	C	T	F	P	L	F	C	P	P	C	1	2	2
793	C	P	P	C	S	I	K	Q	F	C	N	L	S	Y	R	C	Y	Y	F	I	Y	C	P	P	C	1	2	2
794	C	P	P	C	S	I	N	F	I	C	L	F	V	M	I	C	F	Y	F	T	N	C	P	P	C	1	2	2
795	C	P	P	C	S	Q	D	M	L	C	N	F	T	T	D	C	F	I	S	N	N	C	P	P	C	1	2	2
796	C	P	P	C	S	D	H	F	M	C	N	L	S	H	R	C	T	F	T	Y	D	C	P	P	C	1	2	2
797	C	P	P	C	S	D	F	*	I	C	H	F	P	I	T	C	S	N	H	L	Y	C	P	P	C	1	2	2
798	C	P	P	C	S	G	G	D	E	C	S	R	L	I	W	C	S	S	H	I	Y	C	P	P	C	1	2	2
799	C	P	P	C	S	V	Y	I	F	C	Y	I	I	L	F	C	L	I	N	I	Y	C	P	P	C	1	2	2
800	C	P	P	C	S	*	N	S	Q	C	L	T	K	D	I	C	P	Y	Y	Q	S	C	P	P	C	1	2	2
801	C	P	P	C	S	Y	F	I	H	C	N	F	I	Y	F	C	F	N	I	R	S	C	P	P	C	1	2	2
802	C	P	P	C	W	N	F	V	L	C	N	F	L	F	M	C	T	V	L	H	L	C	P	P	C	1	2	2
803	C	P	P	C	W	T	S	I	F	C	N	R	K	Y	R	C	I	W	L	L	H	C	P	P	C	1	2	2
804	C	P	P	C	W	V	F	R	Q	C	M	T	M	M	F	C	N	W	S	T	N	C	P	P	C	1	2	2
805	C	P	P	C	W	W	K	S	W	C	F	S	*	W	R	C	S	D	P	H	V	C	P	P	C	1	2	2
806	C	P	P	C	L	R	P	W	N	C	P	S	L	P	F	C	L	T	A	H	L	C	P	P	C	1	2	2
807	C	P	P	C	L	R	P	W	T	C	P	S	L	P	F	C	L	T	A	N	L	C	P	P	C	1	2	2
808	C	P	P	C	L	L	E	N	N	C	S	L	I	F	Q	C	N	F	I	L	N	C	P	P	C	1	2	2
809	C	P	P	C	F	N	S	L	R	C	I	Y	P	T	P	C	F	T	L	F	K	C	P	P	C	1	2	2
810	C	P	P	C	F	S	I	V	R	C	Q	N	K	V	N	C	Y	M	L	K	T	C	P	P	C	1	2	2
811	C	P	P	C	F	I	N	M	F	C	F	L	N	I	I	C	F	F	N	F	F	C	P	P	C	1	2	2
812	C	P	P	C	F	I	N	W	V	C	Y	Y	F	Y	I	C	F	Y	I	Y	V	C	P	P	C	1	2	2
813	C	P	P	C	F	*	I	S	Y	C	Y	L	*	H	F	C	I	N	I	F	I	C	P	P	C	1	2	2
814	C	P	P	C	F	L	D	Q	D	C	Y	N	Y	R	F	C	K	F	N	D	S	C	P	P	C	1	2	2
815	C	P	P	C	F	F	Y	Y	H	C	Y	F	F	F	L	C	L	L	F	F	I	C	P	P	C	1	2	2
816	C	P	P	C	Q	A	S	V	A	C	*	S	K	S	T	C	N	I	Q	L	K	C	P	P	C	1	2	2
817	C	P	P	C	Q	T	V	A	I	C	I	D	K	H	N	C	G	V	V	Y	R	C	P	P	C	1	2	2
818	C	P	P	C	S	G	L	Q	D	C	S	N	M	L	L	C	I	S	L	S	N	C	P	P	C	1	2	2
819	C	P	P	C	H	N	F	E	F	C	N	A	N	S	A	C	*	I	Q	F	P	C	P	P	C	1	2	2
820	C	P	P	C	N	M	N	Y	I	C	Y	F	I	I	F	C	N	F	L	F	Y	C	P	P	C	3	5	1.66667
821	C	P	P	C	Q	F	A	N	F	C	F	*	L	S	M	C	F	Y	T	V	L	C	P	P	C	3	5	1.66667
822	C	P	P	C	Y	S	Q	G	D	C	S	Y	P	P	F	C	D	S	A	P	F	C	P	P	C	3	5	1.66667
823	C	P	P	C	Q	N	G	L	W	C	L	T	T	P	L	C	H	I	V	N	W	C	P	P	C	4	6	1.5
824	C	P	P	C	T	R	Q	I	D	C	W	K	S	H	M	C	I	R	L	*	Y	C	P	P	C	2	3	1.5
825	C	P	P	C	S	R	S	S	E	C	F	W	T	F	*	C	N	H	K	F	F	C	P	P	C	2	3	1.5
826	C	P	P	C	L	E	W	S	I	C	M	Y	F	H	Q	C	L	P	*	Y	V	C	P	P	C	2	3	1.5
827	C	P	P	C	R	Y	S	F	L	C	*	H	L	V	V	C	Y	F	A	T	G	C	P	P	C	3	4	1.33333
828	C	P	P	C	E	N	*	N	Y	C	F	P	I	Y	F	C	F	F	L	K	H	C	P	P	C	3	4	1.33333
829	C	P	P	C	R	L	*	R	D	C	I	N	H	N	*	C	P	T	Q	G	P	C	P	P	C	6	6	1
830	C	P	P	C	S	L	V	Q	G	C	S	H	P	I	N	C	L	N	A	T	N	C	P	P	C	3	3	1
831	C	P	P	C	N	N	S	K	F	C	Y	F	I	Y	P	C	I	F	H	L	V	C	P	P	C	2	2	1
832	C	P	P	C	T	L	M	E	G	C	N	G	S	S	I	C	I	I	T	P	I	C	P	P	C	2	2	1
833	C	P	P	C	I	I	F	*	D	C	M	T	H	K	T	C	N	Y	W	T	N	C	P	P	C	2	2	1
834	C	P	P	C	L	H	I	M	F	C	D	W	Y	I	W	C	I	I	I	F	L	C	P	P	C	2	2	1
835	C	P	P	C	V	Q	T	*	Y	C	I	I	S	I	N	C	S	S	A	N	F	C	P	P	C	2	2	1
836	C	P	P	C	M	M	M	N	F	C	H	S	T	H	L	C	E	I	Y	L	K	C	P	P	C	1	1	1
837	C	P	P	C	L	*	T	L	Y	C	F	L	F	F	F	C	F	Y	H	I	F	C	P	P	C	1	1	1
838	C	P	P	C	N	R	Y	Y	G	C	S	L	R	W	W	C	V	N	P	S	R	C	P	P	C	1	1	1
839	C	P	P	C	F	M	R	K	F	C	T	V	R	R	L	C	L	Y	T	S	N	C	P	P	C	1	1	1
840	C	P	P	C	I	H	S	P	V	C	H	T	M	T	*	C	T	Y	L	V	S	C	P	P	C	1	1	1
841	C	P	P	C	L	L	M	S	S	C	N	L	T	Q	Q	C	M	I	I	Y	P	C	P	P	C	1	1	1
842	C	P	P	C	E	N	L	Y	G	C	L	L	S	S	L	C	A	N	V	Q	Y	C	P	P	C	1	1	1
843	C	P	P	C	*	Y	R	Y	K	C	S	F	F	S	H	C	Y	I	S	Y	I	C	P	P	C	1	1	1
844	C	P	P	C	Y	I	S	Q	N	C	*	S	T	L	R	C	F	N	R	S	T	C	P	P	C	1	1	1
845	C	P	P	C	K	N	N	P	Q	C	R	G	F	Y	R	C	D	F	L	N	F	C	P	P	C	1	1	1
846	C	P	P	C	K	S	L	P	L	C	I	N	L	H	H	C	I	F	H	V	N	C	P	P	C	1	1	1
847	C	P	P	C	K	M	L	E	N	C	F	V	M	I	S	C	M	T	Y	S	L	C	P	P	C	1	1	1
848	C	P	P	C	K	I	L	S	T	C	N	Y	Y	F	Y	C	Y	N	I	I	L	C	P	P	C	1	1	1
849	C	P	P	C	K	I	F	*	M	C	T	L	Q	K	I	C	F	S	F	S	S	C	P	P	C	1	1	1
850	C	P	P	C	K	I	F	*	M	C	T	L	Q	N	S	C	F	S	F	S	S	C	P	P	C	1	1	1
851	C	P	P	C	K	H	G	H	T	C	S	N	F	N	V	C	A	W	Q	H	Y	C	P	P	C	1	1	1
852	C	P	P	C	K	H	F	M	T	C	T	I	L	D	V	C	F	I	Y	I	N	C	P	P	C	1	1	1
853	C	P	P	C	K	H	F	M	T	C	T	I	L	Y	V	C	F	I	Y	I	N	C	P	P	C	1	1	1
854	C	P	P	C	K	H	F	M	T	C	T	I	L	Y	V	C	F	I	Y	L	N	C	P	P	C	1	1	1
855	C	P	P	C	K	R	L	L	I	C	H	F	M	D	V	C	N	Y	Y	N	I	C	P	P	C	1	1	1
856	C	P	P	C	K	L	L	N	R	C	D	M	M	N	I	C	N	S	T	L	D	C	P	P	C	1	1	1
857	C	P	P	C	K	L	Y	L	P	C	S	N	P	P	S	C	N	S	I	N	Y	C	P	P	C	1	1	1
858	C	P	P	C	K	A	T	F	S	C	I	*	N	M	F	C	N	I	I	Q	M	C	P	P	C	1	1	1
859	C	P	P	C	K	G	N	I	H	C	S	H	H	S	I	C	Y	F	K	Y	Q	C	P	P	C	1	1	1
860	C	P	P	C	K	G	P	A	S	C	I	Q	N	R	M	C	N	K	N	M	W	C	P	P	C	1	1	1
861	C	P	P	C	K	V	S	T	S	C	F	I	I	N	L	C	H	N	Y	N	P	C	P	P	C	1	1	1
862	C	P	P	C	K	V	V	A	V	C	F	S	L	W	G	C	W	R	I	A	I	C	P	P	C	1	1	1
863	C	P	P	C	K	*	L	W	I	C	P	L	Y	Y	L	C	*	I	A	H	*	C	P	P	C	1	1	1
864	C	P	P	C	K	Y	R	L	K	C	T	L	P	P	*	C	*	I	P	L	F	C	P	P	C	1	1	1
865	C	P	P	C	K	L	N	S	L	C	N	I	S	F	I	C	L	N	P	N	N	C	P	P	C	1	1	1
866	C	P	P	C	K	F	I	I	H	C	H	I	Y	F	P	C	F	Y	Y	I	N	C	P	P	C	1	1	1
867	C	P	P	C	N	K	D	F	S	C	N	L	M	Q	L	C	I	I	N	N	D	C	P	P	C	1	1	1
868	C	P	P	C	N	K	Y	L	S	C	K	N	Y	T	S	C	D	S	F	Y	Y	C	P	P	C	1	1	1
869	C	P	P	C	N	N	N	Y	T	C	F	N	H	N	F	C	S	F	F	L	S	C	P	P	C	1	1	1
870	C	P	P	C	N	N	S	T	H	C	L	N	R	I	*	C	*	N	F	M	T	C	P	P	C	1	1	1
871	C	P	P	C	N	N	H	L	I	C	D	D	K	N	N	C	T	M	N	S	Q	C	P	P	C	1	1	1
872	C	P	P	C	N	N	L	M	N	C	F	L	N	T	H	C	Y	F	H	Y	I	C	P	P	C	1	1	1
873	C	P	P	C	N	N	F	K	L	C	G	N	M	L	S	C	S	S	Q	F	I	C	P	P	C	1	1	1
874	C	P	P	C	N	N	F	K	L	C	G	N	M	L	S	C	S	S	Q	F	I	C	P	P	C	1	1	1
875	C	P	P	C	N	N	F	K	L	C	G	N	M	L	S	C	S	S	H	F	N	C	P	P	C	1	1	1
876	C	P	P	C	N	N	F	K	L	C	G	N	L	L	S	C	S	S	H	F	I	C	P	P	C	1	1	1
877	C	P	P	C	N	N	F	R	L	C	G	N	M	L	S	C	S	S	H	F	I	C	P	P	C	1	1	1
878	C	P	P	C	N	T	Y	F	S	C	F	R	F	L	K	C	T	I	Y	L	*	C	P	P	C	1	1	1
879	C	P	P	C	N	R	Q	I	Q	C	S	Y	L	S	Y	C	L	S	F	L	Y	C	P	P	C	1	1	1
880	C	P	P	C	N	S	V	Y	F	C	I	L	I	H	L	C	D	N	N	I	K	C	P	P	C	1	1	1
881	C	P	P	C	N	M	K	R	S	C	F	N	L	S	A	C	Y	F	T	Q	Y	C	P	P	C	1	1	1
882	C	P	P	C	N	M	N	L	G	C	T	R	H	P	F	C	Y	T	M	S	Y	C	P	P	C	1	1	1
883	C	P	P	C	N	I	T	I	S	C	L	H	S	L	I	C	I	N	H	K	I	C	P	P	C	1	1	1
884	C	P	P	C	N	I	I	F	I	C	F	I	F	F	F	C	I	Y	F	Y	F	C	P	P	C	1	1	1
885	C	P	P	C	N	H	Y	N	H	C	T	Y	H	N	L	C	Y	N	L	L	L	C	P	P	C	1	1	1
886	C	P	P	C	N	P	R	L	N	C	G	F	T	S	N	C	H	R	K	I	I	C	P	P	C	1	1	1
887	C	P	P	C	N	R	S	Y	G	C	S	L	R	W	W	C	V	N	P	S	R	C	P	P	C	1	1	1
888	C	P	P	C	N	L	T	T	I	C	Q	S	L	Y	T	C	L	N	L	P	L	C	P	P	C	1	1	1
889	C	P	P	C	N	L	M	D	K	C	I	L	N	I	P	C	F	N	Q	L	I	C	P	P	C	1	1	1
890	C	P	P	C	N	L	P	W	L	C	N	H	P	T	R	C	Y	N	S	F	L	C	P	P	C	1	1	1
891	C	P	P	C	N	L	G	Y	L	C	V	I	T	M	D	C	N	F	P	I	A	C	P	P	C	1	1	1
892	C	P	P	C	N	L	F	*	L	C	F	Y	H	N	I	C	I	S	T	F	I	C	P	P	C	1	1	1
893	C	P	P	C	N	L	F	Y	F	C	K	I	S	F	N	C	Y	N	F	L	S	C	P	P	C	1	1	1
894	C	P	P	C	N	E	L	S	V	C	V	L	A	T	A	C	P	R	I	N	I	C	P	P	C	1	1	1
895	C	P	P	C	N	A	I	T	L	C	N	I	L	I	S	C	S	I	N	T	I	C	P	P	C	1	1	1
896	C	P	P	C	N	G	A	V	W	C	V	*	T	L	T	C	D	D	G	V	N	C	P	P	C	1	1	1
897	C	P	P	C	N	V	R	K	V	C	K	K	R	P	L	C	S	F	V	Q	L	C	P	P	C	1	1	1
898	C	P	P	C	N	V	*	*	I	C	N	P	L	S	V	C	I	W	L	P	V	C	P	P	C	1	1	1
899	C	P	P	C	N	Y	P	L	S	C	F	N	N	T	L	C	T	N	I	K	H	C	P	P	C	1	1	1
900	C	P	P	C	N	Y	P	L	S	C	F	N	N	S	I	C	T	N	I	K	H	C	P	P	C	1	1	1
901	C	P	P	C	N	Y	A	I	L	C	Y	F	V	I	S	C	I	F	Y	M	I	C	P	P	C	1	1	1
902	C	P	P	C	N	Y	A	I	L	C	Y	F	F	I	S	C	I	F	N	M	I	C	P	P	C	1	1	1
903	C	P	P	C	N	Y	A	I	L	C	Y	F	F	I	S	C	I	F	Y	M	I	C	P	P	C	1	1	1
904	C	P	P	C	N	Y	F	L	L	C	N	N	S	N	Q	C	F	N	N	Y	Q	C	P	P	C	1	1	1
905	C	P	P	C	N	S	N	M	F	C	I	F	Y	Y	S	C	F	N	Y	H	L	C	P	P	C	1	1	1
906	C	P	P	C	N	W	I	N	G	C	V	L	N	Y	S	C	S	L	L	F	A	C	P	P	C	1	1	1
907	C	P	P	C	N	L	I	S	*	C	L	S	N	H	P	C	Y	F	I	H	M	C	P	P	C	1	1	1
908	C	P	P	C	N	F	N	N	P	C	D	N	N	F	H	C	N	N	*	H	Y	C	P	P	C	1	1	1
909	C	P	P	C	N	F	N	F	Q	C	Y	P	K	I	S	C	T	I	V	M	N	C	P	P	C	1	1	1
910	C	P	P	C	N	F	T	L	M	C	I	I	F	F	I	C	Y	Y	F	N	F	C	P	P	C	1	1	1
911	C	P	P	C	N	F	I	P	R	C	N	N	N	Y	A	C	Y	F	P	F	T	C	P	P	C	1	1	1
912	C	P	P	C	N	F	P	R	P	C	H	A	F	D	P	C	N	Y	I	N	T	C	P	P	C	1	1	1
913	C	P	P	C	N	F	P	R	P	C	H	A	F	D	P	C	N	Y	I	H	M	C	P	P	C	1	1	1
914	C	P	P	C	N	F	P	R	S	C	R	P	R	L	K	C	Y	S	L	T	S	C	P	P	C	1	1	1
915	C	P	P	C	N	F	P	L	S	C	R	P	R	L	K	C	Y	S	L	T	S	C	P	P	C	1	1	1
916	C	P	P	C	N	F	P	L	S	C	R	P	R	L	K	C	*	S	L	T	S	C	P	P	C	1	1	1
917	C	P	P	C	N	F	P	L	S	C	R	P	R	L	K	C	Y	S	L	T	S	C	P	P	C	1	1	1
918	C	P	P	C	N	F	P	L	S	C	R	P	R	L	K	C	S	S	L	T	S	C	P	P	C	1	1	1
919	C	P	P	C	N	F	P	L	S	C	G	P	R	L	K	C	Y	S	L	T	S	C	P	P	C	1	1	1
920	C	P	P	C	N	F	S	Y	F	C	I	Y	F	N	Y	C	N	I	I	N	F	C	P	P	C	1	1	1
921	C	P	P	C	N	F	F	N	M	C	I	N	T	F	I	C	N	F	F	L	N	C	P	P	C	1	1	1
922	C	P	P	C	T	K	T	L	S	C	N	P	N	I	F	C	K	N	R	N	F	C	P	P	C	1	1	1
923	C	P	P	C	T	N	N	*	L	C	N	L	Y	D	S	C	I	F	D	Y	L	C	P	P	C	1	1	1
924	C	P	P	C	T	T	Q	L	S	C	H	I	S	H	R	C	Y	A	Y	N	I	C	P	P	C	1	1	1
925	C	P	P	C	T	S	Y	I	K	C	I	K	N	H	M	C	*	D	N	F	I	C	P	P	C	1	1	1
926	C	P	P	C	T	M	M	V	V	C	F	M	F	P	L	C	S	N	H	L	R	C	P	P	C	1	1	1
927	C	P	P	C	T	M	Y	N	L	C	F	N	L	N	*	C	F	N	L	Y	F	C	P	P	C	1	1	1
928	C	P	P	C	T	H	S	A	H	C	V	R	S	H	H	C	L	T	I	F	P	C	P	P	C	1	1	1
929	C	P	P	C	T	H	Q	D	L	C	D	H	N	M	K	C	T	Y	P	*	P	C	P	P	C	1	1	1
930	C	P	P	C	T	R	T	L	V	C	D	A	Q	Y	Y	C	N	I	T	L	M	C	P	P	C	1	1	1
931	C	P	P	C	T	D	P	E	I	C	N	F	R	T	V	C	F	Y	H	L	N	C	P	P	C	1	1	1
932	C	P	P	C	T	G	Y	K	K	C	Y	F	L	K	A	C	T	I	H	S	D	C	P	P	C	1	1	1
933	C	P	P	C	T	Y	K	A	S	C	G	F	I	L	T	C	N	Q	N	N	G	C	P	P	C	1	1	1
934	C	P	P	C	T	Y	W	H	F	C	Y	P	F	N	V	C	L	S	L	Y	*	C	P	P	C	1	1	1
935	C	P	P	C	T	S	L	L	D	C	Y	I	S	S	L	C	N	N	Y	*	H	C	P	P	C	1	1	1
936	C	P	P	C	T	F	F	N	T	C	Y	Q	T	L	K	C	N	H	F	N	N	C	P	P	C	1	1	1
937	C	P	P	C	T	F	F	L	F	C	F	F	F	I	F	C	I	I	F	S	M	C	P	P	C	1	1	1
938	C	P	P	C	T	K	T	L	N	C	P	F	S	T	F	C	I	Y	F	H	D	C	P	P	C	1	1	1
939	C	P	P	C	T	K	M	N	V	C	R	S	I	W	N	C	Y	I	Y	T	*	C	P	P	C	1	1	1
940	C	P	P	C	T	K	S	S	T	C	H	R	N	T	P	C	I	K	I	I	S	C	P	P	C	1	1	1
941	C	P	P	C	T	N	S	N	*	C	Y	L	N	I	N	C	I	T	F	Y	I	C	P	P	C	1	1	1
942	C	P	P	C	T	N	L	V	K	C	Y	N	F	Y	P	C	Y	S	L	Y	P	C	P	P	C	1	1	1
943	C	P	P	C	T	N	A	L	H	C	G	T	T	I	N	C	Y	H	E	T	Q	C	P	P	C	1	1	1
944	C	P	P	C	T	N	S	K	*	C	L	T	F	L	R	C	L	H	F	S	N	C	P	P	C	1	1	1
945	C	P	P	C	T	T	V	V	D	C	S	W	H	R	S	C	Q	P	V	L	S	C	P	P	C	1	1	1
946	C	P	P	C	T	T	P	A	E	C	P	L	P	H	M	C	W	R	L	E	T	C	P	P	C	1	1	1
947	C	P	P	C	T	M	N	S	L	C	T	N	I	K	P	C	W	L	V	Y	E	C	P	P	C	1	1	1
948	C	P	P	C	T	M	T	N	K	C	T	N	S	S	M	C	P	S	E	K	R	C	P	P	C	1	1	1
949	C	P	P	C	T	M	L	D	R	C	L	F	P	T	A	C	F	T	T	P	G	C	P	P	C	1	1	1
950	C	P	P	C	T	I	L	S	F	C	H	A	P	I	L	C	N	N	L	T	N	C	P	P	C	1	1	1
951	C	P	P	C	T	I	A	S	Y	C	T	M	H	T	T	C	*	S	Q	S	F	C	P	P	C	1	1	1
952	C	P	P	C	T	I	*	I	I	C	N	R	L	K	D	C	I	G	F	Y	L	C	P	P	C	1	1	1
953	C	P	P	C	T	I	F	S	A	C	S	I	F	L	R	C	*	H	H	N	H	C	P	P	C	1	1	1
954	C	P	P	C	T	I	F	L	I	C	Y	I	S	N	D	C	Y	F	N	Y	Y	C	P	P	C	1	1	1
955	C	P	P	C	T	H	S	T	V	C	R	G	K	K	N	C	F	Y	S	I	H	C	P	P	C	1	1	1
956	C	P	P	C	T	P	N	N	T	C	L	Y	N	P	L	C	F	N	P	T	F	C	P	P	C	1	1	1
957	C	P	P	C	T	P	R	L	L	C	F	S	Y	T	V	C	*	W	H	I	L	C	P	P	C	1	1	1
958	C	P	P	C	T	R	Q	S	E	C	W	K	S	H	M	C	I	R	L	*	Y	C	P	P	C	1	1	1
959	C	P	P	C	T	R	Q	I	D	C	W	K	S	H	M	C	I	R	R	*	Y	C	P	P	C	1	1	1
960	C	P	P	C	T	R	Q	I	D	C	W	K	S	H	L	C	I	R	L	*	Y	C	P	P	C	1	1	1
961	C	P	P	C	T	R	H	S	A	C	I	H	S	Q	*	C	H	F	R	H	V	C	P	P	C	1	1	1
962	C	P	P	C	T	L	T	H	L	C	Y	H	L	M	R	C	L	I	F	Y	P	C	P	P	C	1	1	1
963	C	P	P	C	T	L	P	K	R	C	M	S	V	S	F	C	N	S	S	V	S	C	P	P	C	1	1	1
964	C	P	P	C	T	D	T	A	A	C	L	V	P	A	F	C	I	Y	T	L	L	C	P	P	C	1	1	1
965	C	P	P	C	T	D	R	A	A	C	H	V	Q	R	P	C	H	L	S	V	V	C	P	P	C	1	1	1
966	C	P	P	C	T	D	F	*	Q	C	P	T	I	F	H	C	L	N	D	F	Y	C	P	P	C	1	1	1
967	C	P	P	C	T	G	M	P	G	C	A	M	V	T	F	C	T	S	Y	F	I	C	P	P	C	1	1	1
968	C	P	P	C	T	V	M	L	F	C	I	I	I	S	F	C	F	F	N	I	L	C	P	P	C	1	1	1
969	C	P	P	C	T	*	L	Q	T	C	I	M	N	I	M	C	W	T	K	Q	D	C	P	P	C	1	1	1
970	C	P	P	C	T	*	L	Q	T	C	I	M	N	I	L	C	W	N	K	Q	D	C	P	P	C	1	1	1
971	C	P	P	C	T	Y	R	R	*	C	L	G	L	Y	N	C	F	N	E	Y	I	C	P	P	C	1	1	1
972	C	P	P	C	T	Y	S	S	K	C	I	N	N	S	N	C	K	S	M	Y	Q	C	P	P	C	1	1	1
973	C	P	P	C	T	F	P	R	P	C	H	A	F	D	P	C	N	Y	I	H	T	C	P	P	C	1	1	1
974	C	P	P	C	T	F	P	L	S	C	R	P	R	L	K	C	Y	S	L	T	S	C	P	P	C	1	1	1
975	C	P	P	C	T	F	A	F	E	C	L	E	K	T	T	C	F	I	L	H	P	C	P	P	C	1	1	1
976	C	P	P	C	R	N	W	A	R	C	*	R	Q	K	R	C	Y	L	V	N	S	C	P	P	C	1	1	1
977	C	P	P	C	R	N	W	V	R	C	*	R	Q	K	R	C	Y	L	V	N	S	C	P	P	C	1	1	1
978	C	P	P	C	R	H	W	A	R	C	*	R	Q	K	R	C	Y	L	V	N	S	C	P	P	C	1	1	1
979	C	P	P	C	R	T	K	*	N	C	F	Q	I	H	S	C	K	N	F	N	Y	C	P	P	C	1	1	1
980	C	P	P	C	R	T	R	H	H	C	R	S	I	N	I	C	Y	F	E	L	I	C	P	P	C	1	1	1
981	C	P	P	C	R	R	N	Y	P	C	Q	P	*	G	G	C	*	V	W	*	N	C	P	P	C	1	1	1
982	C	P	P	C	R	S	L	A	M	C	E	F	Y	P	L	C	H	S	N	P	D	C	P	P	C	1	1	1
983	C	P	P	C	R	S	L	V	F	C	N	R	*	S	Y	C	S	F	S	E	I	C	P	P	C	1	1	1
984	C	P	P	C	R	M	Y	N	S	C	F	N	L	N	*	C	F	N	L	Y	F	C	P	P	C	1	1	1
985	C	P	P	C	R	M	Y	N	L	C	F	N	L	N	*	C	F	N	L	Y	V	C	P	P	C	1	1	1
986	C	P	P	C	R	I	P	S	D	C	F	R	I	R	K	C	D	Y	P	P	F	C	P	P	C	1	1	1
987	C	P	P	C	R	I	D	R	M	C	H	P	R	S	N	C	I	Q	I	P	T	C	P	P	C	1	1	1
988	C	P	P	C	R	I	D	L	M	C	H	P	R	S	K	C	I	Q	I	P	T	C	P	P	C	1	1	1
989	C	P	P	C	R	I	D	L	M	C	P	P	R	S	N	C	I	Q	I	P	T	C	P	P	C	1	1	1
990	C	P	P	C	R	I	F	K	I	C	S	L	T	R	A	C	I	Y	V	Y	L	C	P	P	C	1	1	1
991	C	P	P	C	R	P	M	D	R	C	I	T	S	S	G	C	Q	N	Y	P	S	C	P	P	C	1	1	1
992	C	P	P	C	R	R	G	V	H	C	P	S	P	P	Y	C	S	T	W	E	S	C	P	P	C	1	1	1
993	C	P	P	C	R	R	F	S	G	C	E	V	L	I	A	C	I	S	K	A	L	C	P	P	C	1	1	1
994	C	P	P	C	R	R	F	L	K	C	S	M	K	D	I	C	F	I	T	Q	D	C	P	P	C	1	1	1
995	C	P	P	C	R	L	R	I	A	C	D	Y	Q	Y	M	C	M	P	L	R	I	C	P	P	C	1	1	1
996	C	P	P	C	R	L	G	W	R	C	S	Y	R	I	F	C	N	T	I	K	E	C	P	P	C	1	1	1
997	C	P	P	C	R	D	K	H	L	C	D	T	Q	W	P	C	I	D	L	N	K	C	P	P	C	1	1	1
998	C	P	P	C	R	D	R	D	I	C	I	S	L	S	P	C	L	I	A	V	S	C	P	P	C	1	1	1
999	C	P	P	C	R	D	P	E	I	C	N	F	R	T	V	C	F	Y	H	L	N	C	P	P	C	1	1	1
1000	C	P	P	C	R	G	L	W	R	C	L	S	L	E	K	C	I	N	S	F	K	C	P	P	C	1	1	1
1001	C	P	P	C	R	G	Y	T	D	C	P	F	H	S	M	C	V	I	P	Y	H	C	P	P	C	1	1	1
1002	C	P	P	C	R	G	Y	A	W	C	I	Y	L	T	W	C	G	R	E	V	S	C	P	P	C	1	1	1
1003	C	P	P	C	R	V	M	G	M	C	S	Y	L	N	S	C	Y	F	H	S	F	C	P	P	C	1	1	1
1004	C	P	P	C	R	V	*	R	D	C	I	N	H	N	*	C	P	T	Q	G	P	C	P	P	C	1	1	1
1005	C	P	P	C	R	V	Y	N	L	C	F	N	L	N	*	C	F	N	L	Y	F	C	P	P	C	1	1	1
1006	C	P	P	C	R	V	L	K	G	C	L	W	D	L	D	C	L	N	T	I	Y	C	P	P	C	1	1	1
1007	C	P	P	C	R	Y	V	D	R	C	L	S	L	I	F	C	K	R	S	I	P	C	P	P	C	1	1	1
1008	C	P	P	C	R	S	F	I	L	C	S	A	M	L	S	C	P	Y	V	I	H	C	P	P	C	1	1	1
1009	C	P	P	C	R	S	Q	V	E	C	H	V	I	Y	Y	C	V	Y	L	F	T	C	P	P	C	1	1	1
1010	C	P	P	C	R	S	L	D	R	C	L	S	L	I	F	C	K	R	S	I	P	C	P	P	C	1	1	1
1011	C	P	P	C	R	W	H	N	A	C	I	I	Q	R	D	C	P	Y	F	*	N	C	P	P	C	1	1	1
1012	C	P	P	C	R	W	V	T	D	C	R	R	T	G	N	C	L	L	K	T	P	C	P	P	C	1	1	1
1013	C	P	P	C	S	K	Y	W	R	C	I	Y	Q	L	I	C	M	F	G	R	L	C	P	P	C	1	1	1
1014	C	P	P	C	S	N	L	I	L	C	I	F	Y	F	P	C	I	I	P	L	F	C	P	P	C	1	1	1
1015	C	P	P	C	S	N	L	V	F	C	S	Y	Y	F	N	C	H	S	Y	I	D	C	P	P	C	1	1	1
1016	C	P	P	C	S	N	Y	*	Y	C	N	F	S	I	D	C	F	Y	I	Y	L	C	P	P	C	1	1	1
1017	C	P	P	C	S	T	Y	L	F	C	S	F	F	S	M	C	N	F	Y	N	F	C	P	P	C	1	1	1
1018	C	P	P	C	S	R	T	S	I	C	N	I	M	L	N	C	I	Y	H	Q	I	C	P	P	C	1	1	1
1019	C	P	P	C	S	R	M	Y	L	C	T	F	S	T	I	C	S	V	L	Y	T	C	P	P	C	1	1	1
1020	C	P	P	C	S	R	S	N	R	C	Y	S	R	F	S	C	F	K	P	T	P	C	P	P	C	1	1	1
1021	C	P	P	C	S	S	T	L	K	C	F	S	L	L	T	C	L	K	*	N	K	C	P	P	C	1	1	1
1022	C	P	P	C	S	S	A	L	S	C	L	P	R	D	P	C	I	R	V	P	D	C	P	P	C	1	1	1
1023	C	P	P	C	S	S	Y	N	F	C	V	I	N	Y	H	C	F	F	Y	I	T	C	P	P	C	1	1	1
1024	C	P	P	C	S	S	Y	N	F	C	F	I	N	Y	H	C	F	F	Y	I	N	C	P	P	C	1	1	1
1025	C	P	P	C	S	S	F	S	L	C	H	L	I	S	H	C	L	F	R	F	Y	C	P	P	C	1	1	1
1026	C	P	P	C	S	M	L	G	P	C	H	F	K	L	N	C	T	H	D	L	V	C	P	P	C	1	1	1
1027	C	P	P	C	S	I	N	S	S	C	I	S	N	I	P	C	I	N	L	S	K	C	P	P	C	1	1	1
1028	C	P	P	C	S	I	T	V	F	C	V	*	Q	H	K	C	L	H	D	Y	N	C	P	P	C	1	1	1
1029	C	P	P	C	S	I	Q	N	G	C	H	I	M	I	Y	C	R	S	V	I	A	C	P	P	C	1	1	1
1030	C	P	P	C	S	I	H	Y	F	C	S	F	N	N	R	C	L	N	H	N	N	C	P	P	C	1	1	1
1031	C	P	P	C	S	I	L	P	Y	C	S	S	M	S	D	C	N	Y	P	N	N	C	P	P	C	1	1	1
1032	C	P	P	C	S	I	V	G	P	C	H	F	K	L	N	C	T	H	D	L	V	C	P	P	C	1	1	1
1033	C	P	P	C	S	I	L	A	P	C	H	F	K	L	N	C	T	H	D	L	V	C	P	P	C	1	1	1
1034	C	P	P	C	S	I	L	G	P	C	H	V	K	L	N	C	T	H	D	L	V	C	P	P	C	1	1	1
1035	C	P	P	C	S	I	L	G	P	C	H	F	K	L	N	C	T	H	Y	L	V	C	P	P	C	1	1	1
1036	C	P	P	C	S	I	L	G	P	C	H	F	K	L	N	C	T	H	D	L	L	C	P	P	C	1	1	1
1037	C	P	P	C	S	I	L	G	P	C	H	F	K	L	N	C	T	H	D	L	F	C	P	P	C	1	1	1
1038	C	P	P	C	S	I	L	G	P	C	H	F	K	L	Y	C	T	H	D	L	V	C	P	P	C	1	1	1
1039	C	P	P	C	S	I	L	G	P	C	H	F	Q	L	N	C	T	H	D	L	V	C	P	P	C	1	1	1
1040	C	P	P	C	S	I	L	G	P	C	P	F	K	L	N	C	T	H	D	L	V	C	P	P	C	1	1	1
1041	C	P	P	C	S	Q	Q	G	R	C	H	K	A	L	P	C	R	E	S	V	T	C	P	P	C	1	1	1
1042	C	P	P	C	S	Q	Y	N	*	C	Y	I	H	P	Y	C	Y	T	N	H	F	C	P	P	C	1	1	1
1043	C	P	P	C	S	Q	Y	T	T	C	F	L	P	R	I	C	L	N	S	T	D	C	P	P	C	1	1	1
1044	C	P	P	C	S	H	Y	N	*	C	Y	I	Q	P	Y	C	Y	T	N	H	F	C	P	P	C	1	1	1
1045	C	P	P	C	S	H	Y	N	*	C	Y	I	H	P	Y	C	Y	T	N	H	N	C	P	P	C	1	1	1
1046	C	P	P	C	S	H	Y	N	*	C	Y	I	Y	P	Y	C	Y	T	N	H	F	C	P	P	C	1	1	1
1047	C	P	P	C	S	H	Y	N	*	C	S	I	H	P	Y	C	Y	T	N	H	F	C	P	P	C	1	1	1
1048	C	P	P	C	S	P	P	F	L	C	S	P	L	Y	L	C	S	L	T	L	E	C	P	P	C	1	1	1
1049	C	P	P	C	S	P	V	A	R	C	R	R	A	H	Y	C	F	F	Y	H	L	C	P	P	C	1	1	1
1050	C	P	P	C	S	P	Y	N	*	C	Y	I	H	P	Y	C	Y	T	N	Q	F	C	P	P	C	1	1	1
1051	C	P	P	C	S	P	Y	N	*	C	Y	I	H	P	Y	C	Y	T	N	H	F	C	P	P	C	1	1	1
1052	C	P	P	C	S	P	Y	T	D	C	I	G	K	N	L	C	K	G	F	H	T	C	P	P	C	1	1	1
1053	C	P	P	C	S	R	R	L	G	C	K	P	*	F	W	C	A	G	Y	A	P	C	P	P	C	1	1	1
1054	C	P	P	C	S	R	W	S	P	C	S	I	P	P	S	C	F	Q	I	S	S	C	P	P	C	1	1	1
1055	C	P	P	C	S	R	R	L	P	C	T	S	T	M	D	C	D	S	P	K	L	C	P	P	C	1	1	1
1056	C	P	P	C	S	R	L	Y	E	C	S	I	M	M	P	C	L	T	N	T	A	C	P	P	C	1	1	1
1057	C	P	P	C	S	R	Y	R	S	C	R	G	M	A	H	C	V	S	N	N	S	C	P	P	C	1	1	1
1058	C	P	P	C	S	R	Y	R	S	C	R	G	M	A	H	C	V	S	N	N	S	C	P	P	C	1	1	1
1059	C	P	P	C	S	L	N	K	D	C	T	F	N	P	R	C	T	Y	R	N	R	C	P	P	C	1	1	1
1060	C	P	P	C	S	L	R	P	G	C	T	T	R	H	D	C	S	S	M	I	N	C	P	P	C	1	1	1
1061	C	P	P	C	S	L	I	F	F	C	I	Y	L	F	I	C	N	Y	I	I	N	C	P	P	C	1	1	1
1062	C	P	P	C	S	L	V	Q	G	C	S	H	P	M	N	C	L	N	A	T	N	C	P	P	C	1	1	1
1063	C	P	P	C	S	L	V	Q	G	C	S	H	P	I	N	C	L	N	A	P	N	C	P	P	C	1	1	1
1064	C	P	P	C	S	L	Y	V	L	C	F	S	*	K	I	C	F	T	T	Q	I	C	P	P	C	1	1	1
1065	C	P	P	C	S	L	L	Q	G	C	S	H	P	I	N	C	L	N	A	T	N	C	P	P	C	1	1	1
1066	C	P	P	C	S	L	L	G	P	C	H	F	K	L	N	C	T	H	D	L	V	C	P	P	C	1	1	1
1067	C	P	P	C	S	L	F	Y	P	C	I	R	R	L	S	C	M	D	Y	L	S	C	P	P	C	1	1	1
1068	C	P	P	C	S	L	F	Y	P	C	I	R	R	L	S	C	L	D	Y	L	P	C	P	P	C	1	1	1
1069	C	P	P	C	S	L	F	Y	P	C	L	R	R	L	S	C	M	D	Y	L	P	C	P	P	C	1	1	1
1070	C	P	P	C	S	D	H	*	*	C	T	S	F	N	R	C	S	I	I	L	K	C	P	P	C	1	1	1
1071	C	P	P	C	S	D	V	Q	I	C	Y	N	L	L	S	C	F	H	D	*	N	C	P	P	C	1	1	1
1072	C	P	P	C	S	D	Y	*	Y	C	N	S	Y	I	K	C	L	F	S	S	N	C	P	P	C	1	1	1
1073	C	P	P	C	S	D	L	G	S	C	I	S	K	R	G	C	V	N	T	T	P	C	P	P	C	1	1	1
1074	C	P	P	C	S	G	G	S	L	C	L	P	T	F	H	C	S	N	G	P	H	C	P	P	C	1	1	1
1075	C	P	P	C	S	G	S	R	Q	C	L	S	F	R	P	C	S	F	P	W	S	C	P	P	C	1	1	1
1076	C	P	P	C	S	G	T	V	*	C	P	R	L	D	A	C	F	Y	G	Q	T	C	P	P	C	1	1	1
1077	C	P	P	C	S	G	L	Q	E	C	S	N	M	L	L	C	I	S	L	S	N	C	P	P	C	1	1	1
1078	C	P	P	C	S	G	L	Q	D	C	P	N	M	L	L	C	I	S	L	S	N	C	P	P	C	1	1	1
1079	C	P	P	C	S	G	L	Q	D	C	A	N	M	L	L	C	I	S	L	S	N	C	P	P	C	1	1	1
1080	C	P	P	C	S	G	L	Q	D	C	S	N	M	L	V	C	I	S	L	S	N	C	P	P	C	1	1	1
1081	C	P	P	C	S	G	F	V	S	C	H	D	R	N	D	C	H	R	S	D	L	C	P	P	C	1	1	1
1082	C	P	P	C	S	V	Q	L	G	C	M	S	*	R	R	C	D	T	R	E	D	C	P	P	C	1	1	1
1083	C	P	P	C	S	*	N	F	V	C	Y	I	I	I	F	C	N	I	L	Y	S	C	P	P	C	1	1	1
1084	C	P	P	C	S	Y	L	S	D	C	H	R	Y	I	N	C	Y	F	Y	N	P	C	P	P	C	1	1	1
1085	C	P	P	C	S	Y	D	H	V	C	F	N	I	S	Y	C	D	V	T	P	L	C	P	P	C	1	1	1
1086	C	P	P	C	S	Y	G	D	*	C	L	S	R	K	W	C	N	L	F	S	S	C	P	P	C	1	1	1
1087	C	P	P	C	S	Y	V	L	*	C	N	Y	Q	F	D	C	H	P	S	L	T	C	P	P	C	1	1	1
1088	C	P	P	C	S	Y	W	S	L	C	F	I	S	I	K	C	Y	S	Q	H	Y	C	P	P	C	1	1	1
1089	C	P	P	C	S	S	M	P	P	C	L	V	P	I	L	C	Q	R	P	F	P	C	P	P	C	1	1	1
1090	C	P	P	C	S	S	I	I	F	C	I	I	F	F	S	C	L	Y	F	L	N	C	P	P	C	1	1	1
1091	C	P	P	C	S	W	I	S	V	C	G	T	L	P	M	C	Y	F	A	F	*	C	P	P	C	1	1	1
1092	C	P	P	C	S	L	I	H	S	C	Y	N	E	N	S	C	E	I	T	S	N	C	P	P	C	1	1	1
1093	C	P	P	C	S	F	Q	R	A	C	P	N	T	S	L	C	F	L	L	P	T	C	P	P	C	1	1	1
1094	C	P	P	C	S	F	Y	Y	L	C	I	S	A	H	R	C	F	A	Y	S	Q	C	P	P	C	1	1	1
1095	C	P	P	C	M	N	F	L	I	C	Y	N	T	F	F	C	L	N	S	F	F	C	P	P	C	1	1	1
1096	C	P	P	C	M	I	I	P	H	C	L	S	S	L	R	C	N	S	F	P	L	C	P	P	C	1	1	1
1097	C	P	P	C	M	I	D	F	L	C	N	Y	I	S	E	C	N	Y	S	L	P	C	P	P	C	1	1	1
1098	C	P	P	C	M	Q	Q	S	S	C	D	V	*	*	*	C	K	Y	S	T	D	C	P	P	C	1	1	1
1099	C	P	P	C	M	Q	P	F	I	C	F	Y	F	H	W	C	F	I	N	L	N	C	P	P	C	1	1	1
1100	C	P	P	C	M	R	L	M	V	C	P	S	Q	E	L	C	F	I	L	N	N	C	P	P	C	1	1	1
1101	C	P	P	C	M	R	L	L	H	C	F	S	S	V	T	C	V	F	V	P	L	C	P	P	C	1	1	1
1102	C	P	P	C	M	L	S	N	L	C	A	F	T	S	I	C	L	S	L	Y	L	C	P	P	C	1	1	1
1103	C	P	P	C	M	L	N	N	I	C	I	F	Y	F	P	C	H	I	Y	Y	K	C	P	P	C	1	1	1
1104	C	P	P	C	M	L	L	V	Y	C	F	Y	R	F	L	C	I	I	L	Y	F	C	P	P	C	1	1	1
1105	C	P	P	C	M	E	F	M	R	C	M	S	P	T	R	C	W	Y	K	T	Q	C	P	P	C	1	1	1
1106	C	P	P	C	M	D	T	Y	E	C	I	H	R	I	N	C	P	F	M	L	P	C	P	P	C	1	1	1
1107	C	P	P	C	M	D	P	E	S	C	N	F	R	T	V	C	F	Y	H	L	N	C	P	P	C	1	1	1
1108	C	P	P	C	M	D	P	E	I	C	N	F	R	T	G	C	F	Y	H	L	N	C	P	P	C	1	1	1
1109	C	P	P	C	M	D	P	E	I	C	N	F	R	T	V	C	F	Y	H	L	T	C	P	P	C	1	1	1
1110	C	P	P	C	M	D	P	E	I	C	H	F	R	T	V	C	F	Y	H	L	N	C	P	P	C	1	1	1
1111	C	P	P	C	M	G	G	M	Y	C	N	E	F	S	P	C	I	I	R	N	L	C	P	P	C	1	1	1
1112	C	P	P	C	M	V	H	L	S	C	S	N	F	L	R	C	I	I	L	Q	R	C	P	P	C	1	1	1
1113	C	P	P	C	M	S	H	*	R	C	I	R	Q	S	F	C	V	M	I	I	L	C	P	P	C	1	1	1
1114	C	P	P	C	M	L	M	L	K	C	A	R	T	T	T	C	Y	Y	P	A	Q	C	P	P	C	1	1	1
1115	C	P	P	C	M	F	S	F	N	C	T	I	S	H	W	C	Y	N	I	I	Q	C	P	P	C	1	1	1
1116	C	P	P	C	I	K	L	K	*	C	S	R	L	S	R	C	N	N	H	Y	F	C	P	P	C	1	1	1
1117	C	P	P	C	I	N	N	S	N	C	*	N	L	F	I	C	S	F	K	N	S	C	P	P	C	1	1	1
1118	C	P	P	C	I	N	L	I	S	C	F	N	L	I	L	C	D	A	F	F	W	C	P	P	C	1	1	1
1119	C	P	P	C	I	N	L	V	F	C	S	Y	Y	F	N	C	Q	S	Y	I	D	C	P	P	C	1	1	1
1120	C	P	P	C	I	N	L	V	F	C	S	Y	Y	F	N	C	H	S	S	I	D	C	P	P	C	1	1	1
1121	C	P	P	C	I	N	E	R	P	C	I	T	I	L	R	C	L	H	M	N	G	C	P	P	C	1	1	1
1122	C	P	P	C	I	T	H	M	S	C	E	S	Y	K	Y	C	Q	L	I	I	K	C	P	P	C	1	1	1
1123	C	P	P	C	I	T	V	W	L	C	K	S	S	L	V	C	I	F	L	L	H	C	P	P	C	1	1	1
1124	C	P	P	C	I	T	P	R	K	C	D	L	L	R	L	C	L	I	H	N	T	C	P	P	C	1	1	1
1125	C	P	P	C	I	T	A	N	F	C	G	S	L	T	P	C	V	D	H	P	P	C	P	P	C	1	1	1
1126	C	P	P	C	I	T	S	I	T	C	K	N	L	Y	R	C	T	D	I	Y	L	C	P	P	C	1	1	1
1127	C	P	P	C	I	R	R	Y	Y	C	H	T	P	R	F	C	M	R	*	R	S	C	P	P	C	1	1	1
1128	C	P	P	C	I	S	L	Q	S	C	L	T	R	T	L	C	T	S	Y	I	D	C	P	P	C	1	1	1
1129	C	P	P	C	I	S	E	L	I	C	Q	S	L	D	H	C	V	T	L	I	V	C	P	P	C	1	1	1
1130	C	P	P	C	I	M	A	L	L	C	A	P	Y	W	A	C	K	I	*	R	T	C	P	P	C	1	1	1
1131	C	P	P	C	I	I	N	*	F	C	N	N	F	I	F	C	F	F	N	Y	H	C	P	P	C	1	1	1
1132	C	P	P	C	I	I	L	I	F	C	I	F	F	F	Y	C	L	I	F	I	F	C	P	P	C	1	1	1
1133	C	P	P	C	I	I	L	Y	Y	C	I	L	S	L	I	C	I	T	I	F	Y	C	P	P	C	1	1	1
1134	C	P	P	C	I	I	S	N	R	C	F	I	N	N	H	C	I	Y	L	T	I	C	P	P	C	1	1	1
1135	C	P	P	C	I	I	W	N	K	C	M	L	I	P	S	C	Y	T	F	M	I	C	P	P	C	1	1	1
1136	C	P	P	C	I	I	L	L	E	C	S	V	M	A	G	C	V	A	F	A	K	C	P	P	C	1	1	1
1137	C	P	P	C	I	I	F	H	L	C	Y	F	F	I	I	C	N	I	H	F	L	C	P	P	C	1	1	1
1138	C	P	P	C	I	I	F	*	D	C	M	T	H	K	T	C	K	Y	W	T	N	C	P	P	C	1	1	1
1139	C	P	P	C	I	H	M	A	M	C	T	H	Q	N	P	C	L	L	P	V	K	C	P	P	C	1	1	1
1140	C	P	P	C	I	H	A	S	A	C	T	K	N	T	W	C	L	L	P	L	I	C	P	P	C	1	1	1
1141	C	P	P	C	I	H	S	W	G	C	H	L	T	H	R	C	L	L	L	A	P	C	P	P	C	1	1	1
1142	C	P	P	C	I	P	N	S	S	C	Q	W	N	T	S	C	I	L	Y	H	N	C	P	P	C	1	1	1
1143	C	P	P	C	I	R	H	R	G	C	D	R	Q	Y	P	C	*	I	H	D	D	C	P	P	C	1	1	1
1144	C	P	P	C	I	L	N	T	S	C	Y	H	S	T	L	C	Y	N	L	D	D	C	P	P	C	1	1	1
1145	C	P	P	C	I	L	N	S	S	C	H	H	S	T	L	C	Y	N	L	D	D	C	P	P	C	1	1	1
1146	C	P	P	C	I	L	N	S	S	C	Y	H	S	T	L	C	Y	I	L	D	D	C	P	P	C	1	1	1
1147	C	P	P	C	I	L	Y	I	*	C	A	F	P	L	I	C	N	I	F	M	Y	C	P	P	C	1	1	1
1148	C	P	P	C	I	D	P	E	I	C	N	F	R	T	V	C	F	Y	H	L	N	C	P	P	C	1	1	1
1149	C	P	P	C	I	D	S	A	M	C	I	L	M	P	L	C	G	S	F	E	F	C	P	P	C	1	1	1
1150	C	P	P	C	I	A	F	L	N	C	N	N	T	H	L	C	T	T	L	K	T	C	P	P	C	1	1	1
1151	C	P	P	C	I	G	T	S	S	C	F	I	Y	F	I	C	F	Y	F	S	K	C	P	P	C	1	1	1
1152	C	P	P	C	I	V	P	R	H	C	L	I	Y	F	H	C	F	F	N	T	L	C	P	P	C	1	1	1
1153	C	P	P	C	I	*	N	F	V	C	Y	I	I	I	F	C	T	I	L	Y	S	C	P	P	C	1	1	1
1154	C	P	P	C	I	*	N	F	V	C	Y	I	L	I	F	C	N	I	L	Y	S	C	P	P	C	1	1	1
1155	C	P	P	C	I	*	N	F	V	C	Y	L	I	I	F	C	N	I	L	Y	S	C	P	P	C	1	1	1
1156	C	P	P	C	I	*	N	F	V	C	S	I	I	I	F	C	N	I	L	Y	S	C	P	P	C	1	1	1
1157	C	P	P	C	I	Y	T	S	D	C	F	P	T	V	L	C	S	N	L	L	N	C	P	P	C	1	1	1
1158	C	P	P	C	I	Y	S	Y	F	C	S	S	S	F	N	C	I	F	L	P	L	C	P	P	C	1	1	1
1159	C	P	P	C	I	Y	I	H	Y	C	I	I	L	N	L	C	M	S	F	S	H	C	P	P	C	1	1	1
1160	C	P	P	C	I	Y	H	I	Y	C	F	I	K	R	F	C	F	F	F	N	F	C	P	P	C	1	1	1
1161	C	P	P	C	I	Y	P	N	H	C	S	N	Y	T	V	C	N	N	A	P	L	C	P	P	C	1	1	1
1162	C	P	P	C	I	Y	Y	Y	Y	C	H	N	F	I	N	C	F	Y	Y	L	N	C	P	P	C	1	1	1
1163	C	P	P	C	I	Y	F	L	N	C	S	S	T	R	F	C	N	F	T	I	L	C	P	P	C	1	1	1
1164	C	P	P	C	I	Y	F	V	Y	C	T	Y	L	F	F	C	F	N	I	I	Y	C	P	P	C	1	1	1
1165	C	P	P	C	I	Y	F	S	S	C	N	T	H	H	S	C	N	F	F	L	H	C	P	P	C	1	1	1
1166	C	P	P	C	I	S	T	A	V	C	K	R	Q	L	R	C	I	H	R	*	A	C	P	P	C	1	1	1
1167	C	P	P	C	I	S	N	N	D	C	F	I	F	Y	F	C	N	S	F	S	T	C	P	P	C	1	1	1
1168	C	P	P	C	I	S	R	F	R	C	F	W	V	R	N	C	D	A	L	G	Y	C	P	P	C	1	1	1
1169	C	P	P	C	I	S	A	I	I	C	K	V	S	S	F	C	F	F	H	Y	N	C	P	P	C	1	1	1
1170	C	P	P	C	I	S	F	T	*	C	N	T	N	N	F	C	F	N	I	H	N	C	P	P	C	1	1	1
1171	C	P	P	C	I	W	S	I	M	C	Y	D	T	Q	S	C	T	T	S	T	N	C	P	P	C	1	1	1
1172	C	P	P	C	I	F	N	D	D	C	N	N	R	I	S	C	F	N	L	S	I	C	P	P	C	1	1	1
1173	C	P	P	C	I	F	I	F	Y	C	Y	Y	F	H	*	C	N	V	F	Y	F	C	P	P	C	1	1	1
1174	C	P	P	C	I	F	Q	H	W	C	N	F	I	H	F	C	H	N	L	M	N	C	P	P	C	1	1	1
1175	C	P	P	C	I	F	H	N	H	C	N	Y	Y	F	I	C	F	T	I	F	N	C	P	P	C	1	1	1
1176	C	P	P	C	I	F	H	N	H	C	T	Y	Y	F	I	C	V	S	I	F	N	C	P	P	C	1	1	1
1177	C	P	P	C	I	F	H	E	*	C	L	Y	Q	L	R	C	N	N	L	N	N	C	P	P	C	1	1	1
1178	C	P	P	C	I	F	H	E	*	C	V	Y	Q	L	R	C	N	N	L	N	N	C	P	P	C	1	1	1
1179	C	P	P	C	I	F	P	N	H	C	R	N	Y	T	V	C	N	N	A	P	L	C	P	P	C	1	1	1
1180	C	P	P	C	I	F	P	N	H	C	S	N	Y	T	V	C	H	N	A	P	L	C	P	P	C	1	1	1
1181	C	P	P	C	I	F	P	N	P	C	S	N	Y	T	V	C	N	N	A	P	L	C	P	P	C	1	1	1
1182	C	P	P	C	I	F	A	*	N	C	R	P	Y	P	I	C	N	T	Y	L	P	C	P	P	C	1	1	1
1183	C	P	P	C	I	F	Y	S	Y	C	N	N	L	S	L	C	L	N	K	I	T	C	P	P	C	1	1	1
1184	C	P	P	C	I	F	F	I	I	C	N	N	I	N	F	C	F	Y	K	I	I	C	P	P	C	1	1	1
1185	C	P	P	C	I	F	F	F	I	C	T	N	I	Y	L	C	F	N	F	L	F	C	P	P	C	1	1	1
1186	C	P	P	C	H	A	I	I	K	C	S	I	Q	S	K	C	N	L	S	N	S	C	P	P	C	1	1	1
1187	C	P	P	C	Q	N	H	*	S	C	I	S	S	S	H	C	F	P	F	S	F	C	P	P	C	1	1	1
1188	C	P	P	C	Q	N	H	*	S	C	V	S	S	S	H	C	F	P	F	S	F	C	P	P	C	1	1	1
1189	C	P	P	C	Q	N	H	Y	Y	C	K	Y	F	H	L	C	N	N	H	I	I	C	P	P	C	1	1	1
1190	C	P	P	C	Q	N	V	G	Y	C	N	F	T	F	T	C	F	N	S	F	N	C	P	P	C	1	1	1
1191	C	P	P	C	Q	T	Y	W	N	C	R	L	L	Y	L	C	Y	F	P	T	L	C	P	P	C	1	1	1
1192	C	P	P	C	Q	S	V	N	N	C	T	N	L	S	T	C	E	L	P	N	H	C	P	P	C	1	1	1
1193	C	P	P	C	Q	I	R	R	N	C	F	T	N	I	T	C	D	I	I	K	A	C	P	P	C	1	1	1
1194	C	P	P	C	Q	I	H	N	A	C	R	L	P	F	G	C	Y	F	F	N	T	C	P	P	C	1	1	1
1195	C	P	P	C	Q	I	A	T	S	C	K	Q	L	N	I	C	F	F	L	Q	V	C	P	P	C	1	1	1
1196	C	P	P	C	Q	I	V	N	N	C	T	N	L	S	T	C	E	L	P	N	R	C	P	P	C	1	1	1
1197	C	P	P	C	Q	I	V	N	N	C	T	N	L	S	T	C	G	L	P	N	H	C	P	P	C	1	1	1
1198	C	P	P	C	Q	I	V	N	N	C	T	H	L	S	T	C	E	L	P	N	H	C	P	P	C	1	1	1
1199	C	P	P	C	Q	I	V	S	N	C	T	N	L	S	T	C	E	L	P	N	H	C	P	P	C	1	1	1
1200	C	P	P	C	Q	I	Y	F	L	C	I	S	L	F	I	C	Y	F	I	L	H	C	P	P	C	1	1	1
1201	C	P	P	C	Q	I	S	V	T	C	S	R	T	P	V	C	N	Y	S	Y	T	C	P	P	C	1	1	1
1202	C	P	P	C	Q	Q	R	T	W	C	Y	L	F	H	L	C	P	A	I	P	H	C	P	P	C	1	1	1
1203	C	P	P	C	Q	H	N	N	S	C	Y	F	I	S	E	C	Y	N	Y	L	V	C	P	P	C	1	1	1
1204	C	P	P	C	Q	H	Y	I	N	C	I	N	M	*	S	C	I	F	Y	L	Y	C	P	P	C	1	1	1
1205	C	P	P	C	Q	P	L	Q	V	C	F	I	S	P	S	C	Y	Y	I	T	K	C	P	P	C	1	1	1
1206	C	P	P	C	Q	G	V	G	A	C	V	N	Q	L	E	C	S	Q	G	H	R	C	P	P	C	1	1	1
1207	C	P	P	C	Q	Y	N	L	S	C	L	F	K	M	E	C	L	A	G	L	F	C	P	P	C	1	1	1
1208	C	P	P	C	Q	Y	D	F	E	C	Y	K	I	S	M	C	N	N	S	L	L	C	P	P	C	1	1	1
1209	C	P	P	C	Q	Y	L	Q	Y	C	I	V	E	R	F	C	I	Y	L	Y	T	C	P	P	C	1	1	1
1210	C	P	P	C	Q	S	V	G	T	C	L	L	P	T	Y	C	*	T	L	L	L	C	P	P	C	1	1	1
1211	C	P	P	C	Q	L	W	S	G	C	L	G	L	E	M	C	Y	T	S	I	W	C	P	P	C	1	1	1
1212	C	P	P	C	Q	F	H	D	H	C	L	L	N	I	K	C	S	L	I	K	P	C	P	P	C	1	1	1
1213	C	P	P	C	Q	F	P	S	M	C	H	R	D	S	Q	C	K	N	H	I	L	C	P	P	C	1	1	1
1214	C	P	P	C	Q	F	Y	S	V	C	*	S	K	T	*	C	L	K	S	H	F	C	P	P	C	1	1	1
1215	C	P	P	C	Q	F	S	L	*	C	L	I	F	Y	N	C	F	H	F	Y	M	C	P	P	C	1	1	1
1216	C	P	P	C	Q	F	F	T	N	C	S	I	L	N	G	C	V	T	K	I	N	C	P	P	C	1	1	1
1217	C	P	P	C	H	K	Y	F	F	C	F	N	S	L	N	C	N	Y	Y	Y	I	C	P	P	C	1	1	1
1218	C	P	P	C	H	K	F	E	F	C	N	A	N	S	A	C	*	I	Q	F	P	C	P	P	C	1	1	1
1219	C	P	P	C	H	N	I	I	L	C	N	Y	F	N	N	C	Y	N	L	K	H	C	P	P	C	1	1	1
1220	C	P	P	C	H	N	Y	S	I	C	Y	F	N	F	K	C	L	L	Y	N	L	C	P	P	C	1	1	1
1221	C	P	P	C	H	N	F	*	F	C	I	S	S	F	I	C	I	I	N	F	N	C	P	P	C	1	1	1
1222	C	P	P	C	H	N	F	Y	I	C	S	Y	I	I	S	C	N	F	F	K	F	C	P	P	C	1	1	1
1223	C	P	P	C	H	T	S	N	I	C	I	T	H	R	F	C	S	S	R	N	V	C	P	P	C	1	1	1
1224	C	P	P	C	H	T	I	I	N	C	F	S	N	S	H	C	N	N	Y	H	Y	C	P	P	C	1	1	1
1225	C	P	P	C	H	S	M	I	S	C	K	R	L	T	D	C	I	Y	Y	I	S	C	P	P	C	1	1	1
1226	C	P	P	C	H	S	I	T	F	C	Y	Y	S	S	H	C	F	F	I	Y	I	C	P	P	C	1	1	1
1227	C	P	P	C	H	I	Y	D	Y	C	L	F	N	I	T	C	A	Y	I	I	D	C	P	P	C	1	1	1
1228	C	P	P	C	H	I	N	L	Y	C	Y	I	I	I	Q	C	I	Y	L	H	Y	C	P	P	C	1	1	1
1229	C	P	P	C	H	I	N	F	S	C	N	I	T	Y	N	C	L	Q	M	A	Y	C	P	P	C	1	1	1
1230	C	P	P	C	H	I	H	F	Y	C	N	F	S	F	D	C	N	F	Y	N	I	C	P	P	C	1	1	1
1231	C	P	P	C	H	I	L	N	F	C	I	S	S	N	R	C	Y	N	*	S	S	C	P	P	C	1	1	1
1232	C	P	P	C	H	I	L	M	Q	C	F	A	Q	S	T	C	Y	M	I	N	V	C	P	P	C	1	1	1
1233	C	P	P	C	H	I	F	D	F	C	F	F	P	N	V	C	I	M	N	I	D	C	P	P	C	1	1	1
1234	C	P	P	C	H	P	I	T	H	C	I	S	P	N	L	C	Y	I	N	H	K	C	P	P	C	1	1	1
1235	C	P	P	C	H	P	I	L	N	C	I	N	K	S	P	C	I	F	I	Y	F	C	P	P	C	1	1	1
1236	C	P	P	C	H	R	R	P	Q	C	H	F	T	L	H	C	N	H	N	I	T	C	P	P	C	1	1	1
1237	C	P	P	C	H	R	F	S	T	C	N	D	L	V	V	C	Y	W	D	A	R	C	P	P	C	1	1	1
1238	C	P	P	C	H	L	P	H	H	C	I	N	I	P	S	C	N	N	Y	H	I	C	P	P	C	1	1	1
1239	C	P	P	C	H	L	V	N	Y	C	N	I	H	T	I	C	N	S	N	F	H	C	P	P	C	1	1	1
1240	C	P	P	C	H	D	M	I	V	C	I	N	I	N	I	C	T	S	M	N	I	C	P	P	C	1	1	1
1241	C	P	P	C	H	G	I	Q	T	C	T	R	T	P	D	C	P	S	D	M	T	C	P	P	C	1	1	1
1242	C	P	P	C	H	G	L	N	S	C	P	A	T	N	P	C	T	S	M	G	F	C	P	P	C	1	1	1
1243	C	P	P	C	H	V	Y	N	N	C	F	S	K	N	I	C	I	H	Y	I	K	C	P	P	C	1	1	1
1244	C	P	P	C	H	*	K	I	G	C	T	Y	N	R	N	C	P	D	T	Q	E	C	P	P	C	1	1	1
1245	C	P	P	C	H	Y	P	R	E	C	I	F	R	N	P	C	S	I	I	N	Y	C	P	P	C	1	1	1
1246	C	P	P	C	H	Y	A	Y	A	C	L	A	I	P	T	C	I	Y	S	Y	N	C	P	P	C	1	1	1
1247	C	P	P	C	H	S	D	*	R	C	R	H	T	R	S	C	N	K	H	T	K	C	P	P	C	1	1	1
1248	C	P	P	C	H	S	D	*	R	C	R	H	T	R	S	C	N	K	H	T	E	C	P	P	C	1	1	1
1249	C	P	P	C	H	W	S	P	L	C	N	T	P	K	N	C	S	S	V	T	Q	C	P	P	C	1	1	1
1250	C	P	P	C	H	L	K	Y	D	C	M	S	S	D	H	C	Y	Y	I	I	N	C	P	P	C	1	1	1
1251	C	P	P	C	H	L	S	L	V	C	Y	F	F	N	L	C	I	F	S	N	N	C	P	P	C	1	1	1
1252	C	P	P	C	H	F	N	T	D	C	D	F	Q	F	L	C	F	N	Y	L	N	C	P	P	C	1	1	1
1253	C	P	P	C	H	F	N	T	I	C	F	I	I	F	F	C	N	N	K	F	F	C	P	P	C	1	1	1
1254	C	P	P	C	H	F	I	R	H	C	F	S	I	N	F	C	*	F	M	L	L	C	P	P	C	1	1	1
1255	C	P	P	C	H	F	I	Y	M	C	H	N	K	L	P	C	N	K	F	I	L	C	P	P	C	1	1	1
1256	C	P	P	C	H	F	P	Y	N	C	N	Y	H	I	F	C	*	Y	N	Y	D	C	P	P	C	1	1	1
1257	C	P	P	C	H	F	D	F	K	C	F	H	F	*	L	C	I	N	L	F	S	C	P	P	C	1	1	1
1258	C	P	P	C	P	N	Y	D	L	C	L	S	Y	N	L	C	S	R	K	N	F	C	P	P	C	1	1	1
1259	C	P	P	C	P	T	K	R	D	C	T	I	P	K	I	C	W	T	F	N	N	C	P	P	C	1	1	1
1260	C	P	P	C	P	S	R	Q	F	C	I	Y	L	T	S	C	S	H	Y	T	Y	C	P	P	C	1	1	1
1261	C	P	P	C	P	S	S	N	P	C	S	I	P	S	G	C	G	F	Y	S	R	C	P	P	C	1	1	1
1262	C	P	P	C	P	M	K	M	H	C	N	Y	F	N	M	C	S	S	I	N	T	C	P	P	C	1	1	1
1263	C	P	P	C	P	I	N	T	M	C	V	F	I	Y	I	C	I	F	I	M	F	C	P	P	C	1	1	1
1264	C	P	P	C	P	I	Y	N	L	C	Y	I	N	H	R	C	P	I	F	P	N	C	P	P	C	1	1	1
1265	C	P	P	C	P	I	Y	H	L	C	Y	I	N	H	S	C	P	I	F	P	N	C	P	P	C	1	1	1
1266	C	P	P	C	P	I	Y	F	F	C	I	F	I	T	H	C	F	Y	I	F	Y	C	P	P	C	1	1	1
1267	C	P	P	C	P	Q	K	M	Y	C	H	Y	L	P	L	C	V	W	T	G	I	C	P	P	C	1	1	1
1268	C	P	P	C	P	Q	N	T	V	C	F	H	I	T	R	C	S	S	L	F	K	C	P	P	C	1	1	1
1269	C	P	P	C	P	Q	P	L	Q	C	F	D	I	N	K	C	N	F	T	P	I	C	P	P	C	1	1	1
1270	C	P	P	C	P	H	F	P	*	C	H	R	S	Y	N	C	N	N	I	N	I	C	P	P	C	1	1	1
1271	C	P	P	C	P	P	A	P	K	C	V	P	W	G	E	C	L	F	V	L	Y	C	P	P	C	1	1	1
1272	C	P	P	C	P	P	D	I	L	C	S	E	L	H	H	C	L	N	F	L	V	C	P	P	C	1	1	1
1273	C	P	P	C	P	P	V	S	G	C	I	N	L	P	S	C	S	N	L	P	S	C	P	P	C	1	1	1
1274	C	P	P	C	P	R	S	L	F	C	R	R	W	P	R	C	P	L	*	P	M	C	P	P	C	1	1	1
1275	C	P	P	C	P	L	R	Y	F	C	N	F	N	I	N	C	Y	F	F	T	Y	C	P	P	C	1	1	1
1276	C	P	P	C	P	L	L	P	K	C	D	Y	G	T	F	C	S	P	V	N	F	C	P	P	C	1	1	1
1277	C	P	P	C	P	L	S	P	H	C	Y	F	S	S	S	C	I	H	G	F	Y	C	P	P	C	1	1	1
1278	C	P	P	C	P	D	Y	S	I	C	Y	Y	L	P	D	C	F	F	L	N	N	C	P	P	C	1	1	1
1279	C	P	P	C	P	D	Y	S	I	C	Y	Y	L	P	Y	C	F	F	L	N	N	C	P	P	C	1	1	1
1280	C	P	P	C	P	G	N	*	L	C	E	R	T	I	R	C	T	S	I	K	P	C	P	P	C	1	1	1
1281	C	P	P	C	P	G	F	S	S	C	P	N	Q	F	L	C	R	G	F	S	R	C	P	P	C	1	1	1
1282	C	P	P	C	P	*	R	I	F	C	L	S	P	I	P	C	V	T	S	S	Y	C	P	P	C	1	1	1
1283	C	P	P	C	P	Y	I	I	A	C	T	S	F	T	L	C	I	S	F	I	*	C	P	P	C	1	1	1
1284	C	P	P	C	P	Y	A	E	S	C	Q	T	P	T	S	C	I	I	H	W	S	C	P	P	C	1	1	1
1285	C	P	P	C	P	Y	A	E	S	C	Q	S	P	T	R	C	I	I	H	W	S	C	P	P	C	1	1	1
1286	C	P	P	C	P	Y	A	E	S	C	Q	S	P	T	S	C	L	I	H	W	S	C	P	P	C	1	1	1
1287	C	P	P	C	P	Y	A	E	S	C	Q	S	P	P	S	C	I	I	H	W	S	C	P	P	C	1	1	1
1288	C	P	P	C	P	Y	A	E	S	C	Q	S	P	S	S	C	I	I	H	W	S	C	P	P	C	1	1	1
1289	C	P	P	C	P	S	T	L	W	C	L	L	M	R	P	C	F	S	A	Y	K	C	P	P	C	1	1	1
1290	C	P	P	C	P	S	V	Y	P	C	M	L	F	I	L	C	N	A	K	P	P	C	P	P	C	1	1	1
1291	C	P	P	C	P	L	K	M	Q	C	N	Y	F	N	M	C	R	S	I	N	T	C	P	P	C	1	1	1
1292	C	P	P	C	P	L	K	M	H	C	N	Y	F	N	M	C	S	A	I	N	T	C	P	P	C	1	1	1
1293	C	P	P	C	P	L	K	M	H	C	N	Y	F	N	M	C	S	S	I	N	N	C	P	P	C	1	1	1
1294	C	P	P	C	P	L	K	M	H	C	N	Y	F	N	M	C	S	S	I	H	T	C	P	P	C	1	1	1
1295	C	P	P	C	P	L	K	M	H	C	N	Y	F	N	M	C	S	S	L	N	T	C	P	P	C	1	1	1
1296	C	P	P	C	P	L	K	M	H	C	N	Y	F	N	L	C	S	S	I	N	T	C	P	P	C	1	1	1
1297	C	P	P	C	P	L	K	M	H	C	N	Y	F	I	M	C	S	S	I	N	T	C	P	P	C	1	1	1
1298	C	P	P	C	P	L	K	M	H	C	N	Y	F	D	M	C	S	S	I	N	T	C	P	P	C	1	1	1
1299	C	P	P	C	P	L	V	S	L	C	H	H	Y	H	V	C	N	N	H	Y	M	C	P	P	C	1	1	1
1300	C	P	P	C	P	F	F	V	H	C	Y	L	I	S	S	C	H	S	T	L	F	C	P	P	C	1	1	1
1301	C	P	P	C	P	N	D	L	L	C	L	T	S	L	Q	C	R	N	N	T	H	C	P	P	C	1	1	1
1302	C	P	P	C	P	T	Y	S	P	C	M	F	K	P	R	C	Q	L	N	T	N	C	P	P	C	1	1	1
1303	C	P	P	C	P	T	H	M	H	C	F	R	K	G	I	C	V	Y	I	Y	Q	C	P	P	C	1	1	1
1304	C	P	P	C	P	S	E	A	*	C	F	V	T	P	F	C	F	E	L	T	S	C	P	P	C	1	1	1
1305	C	P	P	C	P	S	S	T	I	C	S	Y	L	N	I	C	Y	Y	L	Y	Q	C	P	P	C	1	1	1
1306	C	P	P	C	P	M	N	I	Y	C	N	N	F	I	Y	C	I	N	L	I	F	C	P	P	C	1	1	1
1307	C	P	P	C	P	M	N	P	Y	C	N	S	F	I	S	C	Y	S	F	L	N	C	P	P	C	1	1	1
1308	C	P	P	C	P	I	L	K	I	C	*	S	I	S	G	C	F	I	N	I	I	C	P	P	C	1	1	1
1309	C	P	P	C	P	I	L	T	R	C	A	I	F	I	F	C	G	Y	A	S	P	C	P	P	C	1	1	1
1310	C	P	P	C	P	Q	F	S	Q	C	V	G	T	P	N	C	N	I	N	N	T	C	P	P	C	1	1	1
1311	C	P	P	C	P	H	F	T	T	C	*	N	I	I	Q	C	Y	I	Y	I	F	C	P	P	C	1	1	1
1312	C	P	P	C	P	P	P	L	D	C	S	T	R	S	A	C	L	S	V	H	P	C	P	P	C	1	1	1
1313	C	P	P	C	P	P	D	S	L	C	L	Q	Y	T	R	C	L	F	Y	*	*	C	P	P	C	1	1	1
1314	C	P	P	C	P	L	V	M	R	C	Y	F	L	S	F	C	Y	S	*	F	H	C	P	P	C	1	1	1
1315	C	P	P	C	P	L	N	M	A	C	Y	F	S	K	N	C	I	T	H	N	Y	C	P	P	C	1	1	1
1316	C	P	P	C	P	L	M	T	E	C	F	I	N	P	S	C	K	M	I	N	F	C	P	P	C	1	1	1
1317	C	P	P	C	P	L	H	T	D	C	L	I	A	R	R	C	K	S	F	Q	L	C	P	P	C	1	1	1
1318	C	P	P	C	P	L	P	I	T	C	L	R	L	Q	G	C	L	F	S	K	S	C	P	P	C	1	1	1
1319	C	P	P	C	P	L	Y	Y	I	C	Y	L	Y	Y	N	C	Y	V	F	S	*	C	P	P	C	1	1	1
1320	C	P	P	C	P	L	S	F	Q	C	N	T	T	V	S	C	F	I	Y	F	H	C	P	P	C	1	1	1
1321	C	P	P	C	P	D	I	N	T	C	N	H	Y	S	M	C	F	H	N	F	F	C	P	P	C	1	1	1
1322	C	P	P	C	P	D	*	K	A	C	T	Y	N	M	L	C	L	M	M	K	K	C	P	P	C	1	1	1
1323	C	P	P	C	P	*	S	H	Q	C	L	N	N	Y	L	C	Y	Y	I	T	I	C	P	P	C	1	1	1
1324	C	P	P	C	P	Y	H	F	L	C	N	S	H	M	M	C	I	Y	E	I	I	C	P	P	C	1	1	1
1325	C	P	P	C	P	S	I	F	Y	C	N	L	I	G	L	C	F	F	I	Y	F	C	P	P	C	1	1	1
1326	C	P	P	C	P	S	S	R	D	C	I	S	D	A	N	C	S	L	V	T	P	C	P	P	C	1	1	1
1327	C	P	P	C	P	S	S	R	D	C	I	S	D	A	N	C	S	L	V	T	P	C	P	P	C	1	1	1
1328	C	P	P	C	P	S	S	R	D	C	I	S	D	A	N	C	S	R	V	T	P	C	P	P	C	1	1	1
1329	C	P	P	C	P	S	S	R	D	C	I	S	D	A	N	C	S	L	V	T	P	C	P	P	C	1	1	1
1330	C	P	P	C	P	S	S	R	D	C	I	S	D	A	N	C	S	L	V	T	P	C	P	P	C	1	1	1
1331	C	P	P	C	P	S	S	R	D	C	I	S	D	A	T	C	S	L	V	T	P	C	P	P	C	1	1	1
1332	C	P	P	C	P	S	E	L	Y	C	Q	H	M	F	L	C	S	H	N	I	I	C	P	P	C	1	1	1
1333	C	P	P	C	P	S	E	L	Y	C	H	H	M	F	L	C	S	H	N	I	I	C	P	P	C	1	1	1
1334	C	P	P	C	P	S	E	L	Y	C	P	H	M	F	L	C	S	H	N	I	I	C	P	P	C	1	1	1
1335	C	P	P	C	P	W	M	T	N	C	N	N	S	K	V	C	I	W	T	T	G	C	P	P	C	1	1	1
1336	C	P	P	C	P	L	N	P	Y	C	P	H	I	H	M	C	I	S	F	N	N	C	P	P	C	1	1	1
1337	C	P	P	C	P	L	I	K	I	C	I	I	N	P	K	C	F	L	N	K	L	C	P	P	C	1	1	1
1338	C	P	P	C	P	L	L	K	T	C	S	V	*	T	Y	C	N	W	H	F	H	C	P	P	C	1	1	1
1339	C	P	P	C	P	L	S	E	N	C	T	F	S	M	I	C	F	N	Q	Y	M	C	P	P	C	1	1	1
1340	C	P	P	C	P	F	*	N	Y	C	S	V	H	Y	R	C	Y	Y	V	S	I	C	P	P	C	1	1	1
1341	C	P	P	C	P	F	S	K	I	C	L	R	L	H	M	C	S	M	N	L	H	C	P	P	C	1	1	1
1342	C	P	P	C	P	F	F	S	F	C	Y	Y	I	I	N	C	F	F	L	I	Y	C	P	P	C	1	1	1
1343	C	P	P	C	R	N	R	L	S	C	L	P	Q	H	S	C	R	S	P	S	N	C	P	P	C	1	1	1
1344	C	P	P	C	R	N	R	W	S	C	S	W	L	R	P	C	L	G	L	P	R	C	P	P	C	1	1	1
1345	C	P	P	C	R	T	V	V	E	C	G	D	Y	N	P	C	G	I	G	R	P	C	P	P	C	1	1	1
1346	C	P	P	C	R	S	I	R	W	C	T	I	S	S	P	C	S	S	N	T	A	C	P	P	C	1	1	1
1347	C	P	P	C	R	S	H	L	G	C	N	M	P	K	T	C	I	S	S	T	N	C	P	P	C	1	1	1
1348	C	P	P	C	R	S	D	F	I	C	H	S	P	S	F	C	F	I	L	Y	N	C	P	P	C	1	1	1
1349	C	P	P	C	R	S	D	F	I	C	H	Y	P	S	F	C	F	L	L	Y	N	C	P	P	C	1	1	1
1350	C	P	P	C	R	S	D	F	I	C	H	F	P	S	F	C	F	L	L	Y	N	C	P	P	C	1	1	1
1351	C	P	P	C	R	S	G	L	R	C	H	S	N	K	N	C	I	R	Y	I	L	C	P	P	C	1	1	1
1352	C	P	P	C	R	I	T	S	I	C	N	A	H	Y	T	C	Y	S	Q	K	G	C	P	P	C	1	1	1
1353	C	P	P	C	R	I	L	F	K	C	T	E	R	I	F	C	W	E	W	L	H	C	P	P	C	1	1	1
1354	C	P	P	C	R	R	S	V	R	C	F	D	A	G	I	C	S	W	V	L	G	C	P	P	C	1	1	1
1355	C	P	P	C	R	L	T	K	S	C	Y	I	M	S	R	C	I	F	H	Q	A	C	P	P	C	1	1	1
1356	C	P	P	C	R	L	R	A	D	C	D	S	I	N	R	C	T	K	N	P	N	C	P	P	C	1	1	1
1357	C	P	P	C	R	L	Y	T	N	C	I	S	*	L	Y	C	F	F	I	M	N	C	P	P	C	1	1	1
1358	C	P	P	C	R	D	S	F	E	C	T	H	I	S	S	C	M	E	H	Y	L	C	P	P	C	1	1	1
1359	C	P	P	C	R	G	M	A	W	C	T	L	L	*	G	C	R	V	P	H	Y	C	P	P	C	1	1	1
1360	C	P	P	C	R	Y	T	*	E	C	F	*	L	Y	F	C	S	I	K	F	H	C	P	P	C	1	1	1
1361	C	P	P	C	R	W	A	T	D	C	S	P	T	R	T	C	N	M	F	D	R	C	P	P	C	1	1	1
1362	C	P	P	C	R	W	L	E	W	C	S	Q	H	M	L	C	A	T	I	*	R	C	P	P	C	1	1	1
1363	C	P	P	C	R	W	F	S	R	C	P	S	L	S	P	C	V	I	N	N	S	C	P	P	C	1	1	1
1364	C	P	P	C	R	L	R	F	G	C	K	A	P	S	T	C	T	*	Y	K	S	C	P	P	C	1	1	1
1365	C	P	P	C	R	L	S	F	G	C	K	A	P	S	T	C	T	*	Y	K	S	C	P	P	C	1	1	1
1366	C	P	P	C	R	L	I	V	G	C	K	A	P	S	T	C	T	*	Y	K	S	C	P	P	C	1	1	1
1367	C	P	P	C	R	L	R	L	H	C	S	F	Y	S	S	C	H	N	P	P	S	C	P	P	C	1	1	1
1368	C	P	P	C	R	F	S	P	G	C	S	A	*	T	D	C	I	L	L	D	F	C	P	P	C	1	1	1
1369	C	P	P	C	R	N	I	T	K	C	T	T	H	R	F	C	L	I	Y	S	I	C	P	P	C	1	1	1
1370	C	P	P	C	R	N	H	S	I	C	N	N	P	S	T	C	L	I	F	M	Y	C	P	P	C	1	1	1
1371	C	P	P	C	R	T	K	N	S	C	T	P	S	Y	Y	C	D	W	L	T	S	C	P	P	C	1	1	1
1372	C	P	P	C	R	T	R	*	W	C	T	P	H	S	L	C	I	I	*	H	M	C	P	P	C	1	1	1
1373	C	P	P	C	R	R	K	K	G	C	H	N	W	T	L	C	R	S	N	T	A	C	P	P	C	1	1	1
1374	C	P	P	C	R	R	K	Y	S	C	T	P	S	Y	Y	C	D	W	L	T	S	C	P	P	C	1	1	1
1375	C	P	P	C	R	R	T	K	G	C	H	N	W	N	L	C	R	S	N	T	A	C	P	P	C	1	1	1
1376	C	P	P	C	R	R	I	M	F	C	F	L	S	F	I	C	Y	S	Y	M	H	C	P	P	C	1	1	1
1377	C	P	P	C	R	R	Q	Y	L	C	E	R	T	L	V	C	N	Y	P	V	R	C	P	P	C	1	1	1
1378	C	P	P	C	R	R	E	W	Y	C	P	G	M	V	N	C	W	A	Y	N	H	C	P	P	C	1	1	1
1379	C	P	P	C	R	S	N	P	Y	C	L	H	I	P	T	C	R	F	T	M	N	C	P	P	C	1	1	1
1380	C	P	P	C	R	S	P	P	E	C	D	I	*	P	Y	C	Y	T	N	K	F	C	P	P	C	1	1	1
1381	C	P	P	C	R	S	L	P	K	C	L	D	A	P	W	C	S	F	G	Q	V	C	P	P	C	1	1	1
1382	C	P	P	C	R	S	Y	N	*	C	Q	T	I	L	Y	C	N	N	Y	F	N	C	P	P	C	1	1	1
1383	C	P	P	C	R	S	Y	V	V	C	F	L	Y	F	F	C	N	Y	Y	I	T	C	P	P	C	1	1	1
1384	C	P	P	C	R	S	W	W	R	C	I	L	R	H	F	C	F	P	N	D	W	C	P	P	C	1	1	1
1385	C	P	P	C	R	I	N	I	T	C	L	D	H	R	S	C	T	S	Y	I	I	C	P	P	C	1	1	1
1386	C	P	P	C	R	I	M	*	W	C	H	S	G	S	F	C	F	F	Y	S	W	C	P	P	C	1	1	1
1387	C	P	P	C	R	I	I	P	W	C	A	N	P	S	W	C	Q	G	Y	S	F	C	P	P	C	1	1	1
1388	C	P	P	C	R	I	P	N	L	C	T	I	T	L	A	C	M	R	L	M	S	C	P	P	C	1	1	1
1389	C	P	P	C	R	I	P	N	L	C	I	A	Y	I	D	C	L	G	V	F	S	C	P	P	C	1	1	1
1390	C	P	P	C	R	I	F	F	S	C	I	S	I	*	M	C	Y	N	N	D	N	C	P	P	C	1	1	1
1391	C	P	P	C	R	Q	Q	I	H	C	S	P	A	S	P	C	T	T	M	V	R	C	P	P	C	1	1	1
1392	C	P	P	C	R	Q	Y	Q	V	C	*	T	S	Y	S	C	T	Y	R	N	T	C	P	P	C	1	1	1
1393	C	P	P	C	R	H	P	D	E	C	F	I	P	F	P	C	M	S	*	*	L	C	P	P	C	1	1	1
1394	C	P	P	C	R	H	V	R	L	C	R	S	L	E	N	C	N	S	T	T	L	C	P	P	C	1	1	1
1395	C	P	P	C	R	P	M	T	I	C	T	N	Q	S	D	C	N	L	Y	H	Q	C	P	P	C	1	1	1
1396	C	P	P	C	R	P	S	T	G	C	Q	I	T	K	T	C	Y	T	P	S	T	C	P	P	C	1	1	1
1397	C	P	P	C	R	P	P	R	R	C	Y	I	V	S	Y	C	G	F	T	S	T	C	P	P	C	1	1	1
1398	C	P	P	C	R	R	F	E	R	C	V	Q	T	E	N	C	F	K	N	H	L	C	P	P	C	1	1	1
1399	C	P	P	C	R	R	F	E	R	C	V	Q	T	E	N	C	F	K	N	H	L	C	P	P	C	1	1	1
1400	C	P	P	C	R	R	L	S	G	C	A	D	Y	T	L	C	E	T	N	T	S	C	P	P	C	1	1	1
1401	C	P	P	C	R	L	R	F	S	C	A	P	N	L	F	C	P	P	*	A	P	C	P	P	C	1	1	1
1402	C	P	P	C	R	L	T	Y	S	C	F	Y	K	S	P	C	S	Y	K	Y	E	C	P	P	C	1	1	1
1403	C	P	P	C	R	L	T	L	Y	C	P	Y	M	Q	S	C	L	L	*	F	N	C	P	P	C	1	1	1
1404	C	P	P	C	R	L	I	I	R	C	L	Y	I	F	Y	C	F	S	T	L	F	C	P	P	C	1	1	1
1405	C	P	P	C	R	D	D	E	L	C	L	S	T	Y	P	C	F	S	L	G	M	C	P	P	C	1	1	1
1406	C	P	P	C	R	D	V	N	*	C	I	P	N	T	Y	C	H	R	S	W	L	C	P	P	C	1	1	1
1407	C	P	P	C	R	A	E	G	V	C	E	G	N	S	M	C	N	I	I	A	F	C	P	P	C	1	1	1
1408	C	P	P	C	R	A	M	R	P	C	L	L	L	G	R	C	F	T	N	*	V	C	P	P	C	1	1	1
1409	C	P	P	C	R	A	M	L	S	C	L	Y	*	F	N	C	N	T	I	F	H	C	P	P	C	1	1	1
1410	C	P	P	C	R	G	I	Y	F	C	H	W	T	N	T	C	S	F	H	Y	S	C	P	P	C	1	1	1
1411	C	P	P	C	R	G	V	R	R	C	D	L	S	S	T	C	Q	T	V	L	P	C	P	P	C	1	1	1
1412	C	P	P	C	R	G	H	A	K	C	F	S	G	H	K	C	T	T	A	D	E	C	P	P	C	1	1	1
1413	C	P	P	C	R	G	H	A	K	C	F	S	G	H	T	C	T	T	A	D	E	C	P	P	C	1	1	1
1414	C	P	P	C	R	V	M	G	E	C	A	E	S	Q	H	C	K	F	P	K	I	C	P	P	C	1	1	1
1415	C	P	P	C	R	V	R	I	R	C	A	V	A	V	S	C	L	L	L	G	N	C	P	P	C	1	1	1
1416	C	P	P	C	R	V	Y	L	W	C	L	R	*	Y	Y	C	L	L	Y	N	K	C	P	P	C	1	1	1
1417	C	P	P	C	R	V	P	M	S	C	V	I	V	N	R	C	N	F	W	K	L	C	P	P	C	1	1	1
1418	C	P	P	C	R	*	D	I	Y	C	H	V	P	I	Q	C	S	Y	A	L	R	C	P	P	C	1	1	1
1419	C	P	P	C	R	Y	K	Y	K	C	R	I	M	S	Y	C	N	L	Y	A	Y	C	P	P	C	1	1	1
1420	C	P	P	C	R	Y	R	N	N	C	P	I	R	Y	I	C	I	Y	I	N	I	C	P	P	C	1	1	1
1421	C	P	P	C	R	Y	P	H	S	C	E	N	H	P	S	C	I	Y	N	Y	H	C	P	P	C	1	1	1
1422	C	P	P	C	R	Y	G	W	I	C	S	G	*	I	H	C	M	Y	N	L	K	C	P	P	C	1	1	1
1423	C	P	P	C	R	Y	Y	V	G	C	H	I	K	L	Y	C	F	I	I	F	L	C	P	P	C	1	1	1
1424	C	P	P	C	R	S	F	Q	M	C	S	S	S	Y	W	C	T	R	R	R	L	C	P	P	C	1	1	1
1425	C	P	P	C	R	S	P	T	L	C	G	L	R	R	R	C	A	R	S	I	R	C	P	P	C	1	1	1
1426	C	P	P	C	R	W	H	K	F	C	D	V	T	L	I	C	N	F	T	E	Y	C	P	P	C	1	1	1
1427	C	P	P	C	R	L	H	K	F	C	D	V	T	L	I	C	N	F	T	D	Y	C	P	P	C	1	1	1
1428	C	P	P	C	R	L	L	Y	R	C	L	I	S	H	F	C	N	T	F	I	S	C	P	P	C	1	1	1
1429	C	P	P	C	R	F	K	A	*	C	T	N	*	K	T	C	F	D	D	E	M	C	P	P	C	1	1	1
1430	C	P	P	C	R	F	G	T	L	C	*	S	*	Q	M	C	N	P	G	F	K	C	P	P	C	1	1	1
1431	C	P	P	C	R	F	*	F	N	C	Y	N	S	I	F	C	Y	L	I	I	K	C	P	P	C	1	1	1
1432	C	P	P	C	L	K	D	S	I	C	I	S	F	L	N	C	L	I	N	I	I	C	P	P	C	1	1	1
1433	C	P	P	C	L	K	*	D	L	C	L	S	Y	N	L	C	S	R	K	N	F	C	P	P	C	1	1	1
1434	C	P	P	C	L	K	Y	D	L	C	L	S	Y	N	L	C	S	R	K	N	F	C	P	P	C	1	1	1
1435	C	P	P	C	L	N	H	A	N	C	V	D	S	I	M	C	Y	F	F	D	F	C	P	P	C	1	1	1
1436	C	P	P	C	L	N	Y	D	V	C	L	S	Y	N	L	C	S	R	K	N	F	C	P	P	C	1	1	1
1437	C	P	P	C	L	N	Y	D	W	C	L	S	Y	N	L	C	S	R	K	N	F	C	P	P	C	1	1	1
1438	C	P	P	C	L	N	Y	D	L	C	H	S	Y	N	L	C	S	R	K	N	F	C	P	P	C	1	1	1
1439	C	P	P	C	L	N	Y	D	L	C	R	S	Y	N	L	C	S	R	K	N	F	C	P	P	C	1	1	1
1440	C	P	P	C	L	N	Y	D	L	C	L	S	Y	N	V	C	S	R	K	N	F	C	P	P	C	1	1	1
1441	C	P	P	C	L	N	Y	D	L	C	L	S	Y	K	L	C	S	R	K	N	F	C	P	P	C	1	1	1
1442	C	P	P	C	L	N	Y	D	L	C	L	S	Y	N	V	C	S	R	K	N	F	C	P	P	C	1	1	1
1443	C	P	P	C	L	N	Y	D	L	C	L	S	Y	N	L	C	S	R	N	N	F	C	P	P	C	1	1	1
1444	C	P	P	C	L	N	Y	D	L	C	L	S	Y	N	L	C	S	W	K	N	F	C	P	P	C	1	1	1
1445	C	P	P	C	L	N	Y	D	L	C	L	S	Y	S	L	C	S	R	K	N	F	C	P	P	C	1	1	1
1446	C	P	P	C	L	N	Y	Y	L	C	L	S	Y	N	L	C	S	R	K	N	F	C	P	P	C	1	1	1
1447	C	P	P	C	L	T	K	*	N	C	N	N	R	T	L	C	T	I	S	T	M	C	P	P	C	1	1	1
1448	C	P	P	C	L	T	P	M	H	C	*	W	L	R	S	C	*	F	P	S	S	C	P	P	C	1	1	1
1449	C	P	P	C	L	T	P	M	H	C	*	W	L	R	L	C	*	F	P	S	S	C	P	P	C	1	1	1
1450	C	P	P	C	L	T	H	L	L	C	D	S	R	F	D	C	L	I	I	S	N	C	P	P	C	1	1	1
1451	C	P	P	C	L	T	R	S	E	C	L	R	N	T	N	C	H	N	L	F	S	C	P	P	C	1	1	1
1452	C	P	P	C	L	T	D	K	I	C	N	I	S	Y	P	C	Y	Y	Y	I	Y	C	P	P	C	1	1	1
1453	C	P	P	C	L	S	M	Y	N	C	K	S	L	S	R	C	I	I	M	H	M	C	P	P	C	1	1	1
1454	C	P	P	C	L	S	I	Y	N	C	K	S	L	S	R	C	I	I	M	P	M	C	P	P	C	1	1	1
1455	C	P	P	C	L	S	I	Y	N	C	K	S	L	S	R	C	I	L	M	H	M	C	P	P	C	1	1	1
1456	C	P	P	C	L	S	I	Y	N	C	T	S	L	S	R	C	I	I	M	H	M	C	P	P	C	1	1	1
1457	C	P	P	C	L	S	I	Y	H	C	K	S	L	S	R	C	I	I	M	H	M	C	P	P	C	1	1	1
1458	C	P	P	C	L	S	D	S	N	C	L	Y	R	N	L	C	N	I	K	N	K	C	P	P	C	1	1	1
1459	C	P	P	C	L	M	D	Q	T	C	P	N	F	S	N	C	I	F	D	L	R	C	P	P	C	1	1	1
1460	C	P	P	C	L	M	Y	A	L	C	D	R	N	F	H	C	F	F	L	L	N	C	P	P	C	1	1	1
1461	C	P	P	C	L	I	F	*	D	C	T	L	I	R	H	C	H	Y	K	I	L	C	P	P	C	1	1	1
1462	C	P	P	C	L	P	L	M	Y	C	W	H	S	F	T	C	Y	L	*	K	Q	C	P	P	C	1	1	1
1463	C	P	P	C	L	P	H	S	N	C	S	N	R	S	Q	C	F	L	Y	Y	N	C	P	P	C	1	1	1
1464	C	P	P	C	L	R	S	Y	H	C	L	N	M	L	S	C	F	Y	F	H	P	C	P	P	C	1	1	1
1465	C	P	P	C	L	Y	T	T	F	C	I	L	I	I	G	C	N	I	M	F	S	C	P	P	C	1	1	1
1466	C	P	P	C	L	Y	S	L	G	C	P	E	Q	V	N	C	K	Q	*	A	K	C	P	P	C	1	1	1
1467	C	P	P	C	L	Y	F	N	V	C	S	T	Y	N	L	C	I	F	H	S	H	C	P	P	C	1	1	1
1468	C	P	P	C	L	S	T	V	H	C	T	K	N	T	F	C	E	S	Q	S	R	C	P	P	C	1	1	1
1469	C	P	P	C	L	S	L	L	Y	C	S	V	I	F	W	C	L	I	N	T	T	C	P	P	C	1	1	1
1470	C	P	P	C	L	W	S	Y	K	C	P	S	R	L	P	C	Q	M	T	S	S	C	P	P	C	1	1	1
1471	C	P	P	C	L	N	K	S	I	C	I	T	N	P	T	C	Y	S	Y	Y	F	C	P	P	C	1	1	1
1472	C	P	P	C	L	N	M	S	Y	C	Y	L	W	F	F	C	N	L	N	L	A	C	P	P	C	1	1	1
1473	C	P	P	C	L	N	I	S	K	C	Y	F	Y	Y	H	C	N	F	I	Y	F	C	P	P	C	1	1	1
1474	C	P	P	C	L	N	I	S	K	C	Y	F	Y	S	H	C	K	F	I	Y	F	C	P	P	C	1	1	1
1475	C	P	P	C	L	N	I	S	K	C	Y	F	Y	S	H	C	N	F	L	Y	F	C	P	P	C	1	1	1
1476	C	P	P	C	L	N	I	S	K	C	Y	F	Y	S	P	C	N	F	I	Y	F	C	P	P	C	1	1	1
1477	C	P	P	C	L	N	I	S	N	C	Y	F	Y	S	H	C	N	F	I	Y	F	C	P	P	C	1	1	1
1478	C	P	P	C	L	N	L	I	L	C	H	I	L	F	G	C	N	I	L	I	Y	C	P	P	C	1	1	1
1479	C	P	P	C	L	N	L	S	K	C	Y	F	Y	S	H	C	N	F	I	Y	F	C	P	P	C	1	1	1
1480	C	P	P	C	L	N	*	N	F	C	P	T	L	Y	L	C	N	V	S	T	Y	C	P	P	C	1	1	1
1481	C	P	P	C	L	N	Y	E	S	C	I	T	T	*	A	C	K	S	P	F	A	C	P	P	C	1	1	1
1482	C	P	P	C	L	T	T	A	Q	C	T	A	F	H	*	C	R	F	H	L	Q	C	P	P	C	1	1	1
1483	C	P	P	C	L	T	M	A	Q	C	T	A	F	H	S	C	R	F	H	L	Q	C	P	P	C	1	1	1
1484	C	P	P	C	L	T	M	A	Q	C	T	A	F	P	*	C	R	F	H	L	Q	C	P	P	C	1	1	1
1485	C	P	P	C	L	S	N	Y	S	C	I	R	K	I	F	C	T	Y	E	L	S	C	P	P	C	1	1	1
1486	C	P	P	C	L	S	L	Q	S	C	L	T	R	T	L	C	K	S	Y	I	D	C	P	P	C	1	1	1
1487	C	P	P	C	L	M	I	Y	Q	C	I	N	T	K	P	C	Y	Y	N	I	F	C	P	P	C	1	1	1
1488	C	P	P	C	L	M	H	H	P	C	A	P	S	R	Y	C	I	D	N	R	P	C	P	P	C	1	1	1
1489	C	P	P	C	L	I	N	R	N	C	T	I	S	S	F	C	N	I	Y	N	R	C	P	P	C	1	1	1
1490	C	P	P	C	L	I	N	S	N	C	N	F	T	K	T	C	S	N	Y	Y	N	C	P	P	C	1	1	1
1491	C	P	P	C	L	I	L	A	V	C	S	P	T	S	P	C	M	S	L	N	I	C	P	P	C	1	1	1
1492	C	P	P	C	L	Q	T	Y	Y	C	I	I	S	I	N	C	S	S	A	N	F	C	P	P	C	1	1	1
1493	C	P	P	C	L	Q	Q	L	H	C	P	N	L	S	H	C	K	S	Y	S	L	C	P	P	C	1	1	1
1494	C	P	P	C	L	Q	L	L	H	C	F	T	T	D	T	C	L	T	N	L	R	C	P	P	C	1	1	1
1495	C	P	P	C	L	H	I	M	V	C	D	W	Y	I	W	C	I	I	I	F	L	C	P	P	C	1	1	1
1496	C	P	P	C	L	H	I	M	L	C	D	W	Y	I	W	C	S	I	I	F	L	C	P	P	C	1	1	1
1497	C	P	P	C	L	H	I	M	F	C	D	W	Y	I	W	C	S	I	I	F	L	C	P	P	C	1	1	1
1498	C	P	P	C	L	H	I	M	F	C	D	W	Y	L	W	C	I	I	I	F	L	C	P	P	C	1	1	1
1499	C	P	P	C	L	H	I	M	F	C	D	W	S	I	W	C	I	I	I	F	L	C	P	P	C	1	1	1
1500	C	P	P	C	L	P	N	A	W	C	S	Y	R	I	H	C	V	S	D	S	Y	C	P	P	C	1	1	1
1501	C	P	P	C	L	P	M	L	P	C	Y	D	T	R	G	C	L	L	S	D	S	C	P	P	C	1	1	1
1502	C	P	P	C	L	P	F	H	F	C	F	I	I	P	P	C	W	R	Y	L	N	C	P	P	C	1	1	1
1503	C	P	P	C	L	R	P	K	N	C	D	I	S	F	R	C	F	K	Y	R	Y	C	P	P	C	1	1	1
1504	C	P	P	C	L	R	L	S	L	C	T	I	L	S	F	C	R	A	N	R	A	C	P	P	C	1	1	1
1505	C	P	P	C	L	R	I	Q	E	C	F	Y	L	I	R	C	P	K	K	K	I	C	P	P	C	1	1	1
1506	C	P	P	C	L	L	S	F	S	C	T	K	M	S	E	C	R	A	S	L	H	C	P	P	C	1	1	1
1507	C	P	P	C	L	L	K	F	R	C	T	Y	P	H	*	C	L	F	Q	L	I	C	P	P	C	1	1	1
1508	C	P	P	C	L	L	I	Q	D	C	N	I	R	L	S	C	I	I	S	S	H	C	P	P	C	1	1	1
1509	C	P	P	C	L	L	P	V	Y	C	Y	Y	L	F	F	C	G	D	M	Y	F	C	P	P	C	1	1	1
1510	C	P	P	C	L	E	W	S	S	C	M	Y	F	H	Q	C	L	P	Y	Y	V	C	P	P	C	1	1	1
1511	C	P	P	C	L	E	W	S	I	C	M	Y	F	H	Q	C	L	P	Y	D	V	C	P	P	C	1	1	1
1512	C	P	P	C	L	E	W	S	I	C	M	Y	F	H	Q	C	L	P	Y	Y	L	C	P	P	C	1	1	1
1513	C	P	P	C	L	E	W	S	I	C	M	Y	F	H	Q	C	L	P	S	Y	V	C	P	P	C	1	1	1
1514	C	P	P	C	L	E	W	S	L	C	M	Y	F	H	Q	C	L	P	Y	Y	V	C	P	P	C	1	1	1
1515	C	P	P	C	L	D	W	S	I	C	M	Y	F	H	Q	C	L	P	Y	Y	V	C	P	P	C	1	1	1
1516	C	P	P	C	L	A	Q	S	N	C	M	H	T	T	Y	C	N	S	V	N	W	C	P	P	C	1	1	1
1517	C	P	P	C	L	A	M	L	P	C	Y	D	T	R	G	C	L	F	S	D	S	C	P	P	C	1	1	1
1518	C	P	P	C	L	A	Q	S	N	C	M	H	T	T	Y	C	K	S	V	N	W	C	P	P	C	1	1	1
1519	C	P	P	C	L	A	L	I	Y	C	S	Y	P	N	H	C	S	T	F	L	S	C	P	P	C	1	1	1
1520	C	P	P	C	L	G	L	H	E	C	L	L	S	I	F	C	M	H	N	P	N	C	P	P	C	1	1	1
1521	C	P	P	C	L	*	R	N	F	C	L	F	T	V	*	C	Y	N	Y	F	P	C	P	P	C	1	1	1
1522	C	P	P	C	L	Y	I	Q	N	C	I	H	M	Y	N	C	F	Y	N	R	F	C	P	P	C	1	1	1
1523	C	P	P	C	L	Y	L	K	L	C	I	N	F	Y	I	C	Y	F	F	I	F	C	P	P	C	1	1	1
1524	C	P	P	C	L	Y	L	N	Y	C	Y	F	F	N	F	C	Y	S	N	F	N	C	P	P	C	1	1	1
1525	C	P	P	C	L	Y	L	S	L	C	R	N	Y	T	I	C	K	I	Y	S	L	C	P	P	C	1	1	1
1526	C	P	P	C	L	Y	F	T	D	C	H	Q	M	S	S	C	D	F	I	F	M	C	P	P	C	1	1	1
1527	C	P	P	C	L	S	P	T	K	C	R	I	P	S	S	C	R	V	L	S	V	C	P	P	C	1	1	1
1528	C	P	P	C	L	S	T	T	A	C	Q	S	P	S	K	C	F	F	D	R	I	C	P	P	C	1	1	1
1529	C	P	P	C	L	S	H	D	A	C	*	T	P	V	P	C	I	N	T	K	F	C	P	P	C	1	1	1
1530	C	P	P	C	L	S	P	T	L	C	A	L	R	R	R	C	A	R	S	I	R	C	P	P	C	1	1	1
1531	C	P	P	C	L	S	P	T	L	C	G	L	S	R	R	C	A	R	S	I	R	C	P	P	C	1	1	1
1532	C	P	P	C	L	S	P	S	L	C	G	L	R	R	R	C	A	R	S	I	R	C	P	P	C	1	1	1
1533	C	P	P	C	L	W	N	I	H	C	T	F	S	S	H	C	F	F	M	M	N	C	P	P	C	1	1	1
1534	C	P	P	C	L	W	N	D	T	C	S	S	S	N	L	C	I	H	F	*	S	C	P	P	C	1	1	1
1535	C	P	P	C	L	W	H	S	R	C	S	I	Y	Y	S	C	Y	T	F	*	R	C	P	P	C	1	1	1
1536	C	P	P	C	L	L	N	I	H	C	Y	D	L	Y	K	C	I	I	N	S	S	C	P	P	C	1	1	1
1537	C	P	P	C	L	L	T	L	F	C	H	A	R	W	R	C	T	N	M	L	S	C	P	P	C	1	1	1
1538	C	P	P	C	L	L	M	S	S	C	N	L	T	Q	Q	C	M	I	I	Y	P	C	P	P	C	1	1	1
1539	C	P	P	C	L	L	M	S	S	C	N	L	T	Q	Q	C	M	I	S	Y	P	C	P	P	C	1	1	1
1540	C	P	P	C	L	F	Y	I	N	C	F	H	F	T	F	C	F	I	I	F	L	C	P	P	C	1	1	1
1541	C	P	P	C	L	F	L	Y	I	C	Y	F	F	F	F	C	S	F	Y	S	F	C	P	P	C	1	1	1
1542	C	P	P	C	E	K	I	M	E	C	D	P	S	P	H	C	I	S	L	L	H	C	P	P	C	1	1	1
1543	C	P	P	C	E	N	S	Y	G	C	L	L	S	S	L	C	A	N	V	Q	Y	C	P	P	C	1	1	1
1544	C	P	P	C	E	N	Q	T	Q	C	T	I	S	P	S	C	F	Y	Q	L	I	C	P	P	C	1	1	1
1545	C	P	P	C	E	N	P	A	Q	C	M	H	Q	I	F	C	H	*	I	S	Y	C	P	P	C	1	1	1
1546	C	P	P	C	E	N	R	A	I	C	Y	V	N	M	Y	C	S	S	H	M	S	C	P	P	C	1	1	1
1547	C	P	P	C	E	N	A	M	P	C	L	R	H	I	L	C	N	F	I	L	A	C	P	P	C	1	1	1
1548	C	P	P	C	E	N	A	M	P	C	L	R	H	I	F	C	N	F	T	L	A	C	P	P	C	1	1	1
1549	C	P	P	C	E	N	A	L	P	C	L	R	H	I	F	C	N	F	I	L	A	C	P	P	C	1	1	1
1550	C	P	P	C	E	N	V	M	P	C	L	R	H	I	F	C	N	F	I	L	A	C	P	P	C	1	1	1
1551	C	P	P	C	E	N	V	G	R	C	Y	T	S	N	L	C	H	V	Q	N	I	C	P	P	C	1	1	1
1552	C	P	P	C	E	N	V	V	R	C	Y	T	S	N	L	C	Y	V	Q	N	I	C	P	P	C	1	1	1
1553	C	P	P	C	E	N	F	I	Q	C	H	S	H	G	D	C	F	F	I	S	Y	C	P	P	C	1	1	1
1554	C	P	P	C	E	N	F	I	Q	C	H	S	H	W	D	C	F	F	I	S	Y	C	P	P	C	1	1	1
1555	C	P	P	C	E	T	I	M	E	C	D	P	S	P	H	C	I	S	M	L	H	C	P	P	C	1	1	1
1556	C	P	P	C	E	T	A	M	P	C	L	R	H	I	F	C	N	F	I	L	A	C	P	P	C	1	1	1
1557	C	P	P	C	E	T	F	Y	Y	C	N	M	Q	N	H	C	M	Y	H	P	L	C	P	P	C	1	1	1
1558	C	P	P	C	E	I	K	F	I	C	N	I	G	T	N	C	L	N	F	T	F	C	P	P	C	1	1	1
1559	C	P	P	C	E	I	N	F	I	C	N	I	G	T	K	C	L	N	F	T	F	C	P	P	C	1	1	1
1560	C	P	P	C	E	I	N	F	I	C	N	I	G	T	N	C	W	N	F	T	F	C	P	P	C	1	1	1
1561	C	P	P	C	E	I	N	F	I	C	N	I	G	T	D	C	L	N	F	T	F	C	P	P	C	1	1	1
1562	C	P	P	C	E	I	I	H	N	C	I	I	P	F	T	C	N	F	T	F	I	C	P	P	C	1	1	1
1563	C	P	P	C	E	I	P	Q	N	C	V	S	N	L	G	C	M	M	L	Y	L	C	P	P	C	1	1	1
1564	C	P	P	C	E	I	L	M	N	C	F	N	F	S	Y	C	F	N	N	L	S	C	P	P	C	1	1	1
1565	C	P	P	C	E	I	V	V	D	C	H	G	L	N	F	C	P	T	R	V	S	C	P	P	C	1	1	1
1566	C	P	P	C	E	I	F	I	Y	C	F	Y	F	Y	I	C	T	I	L	T	Y	C	P	P	C	1	1	1
1567	C	P	P	C	E	Q	Q	N	I	C	I	A	L	M	V	C	P	Y	F	S	V	C	P	P	C	1	1	1
1568	C	P	P	C	E	P	I	A	S	C	L	M	L	F	D	C	K	N	T	S	D	C	P	P	C	1	1	1
1569	C	P	P	C	E	P	P	Y	L	C	T	Y	R	F	S	C	R	L	*	Y	I	C	P	P	C	1	1	1
1570	C	P	P	C	E	R	M	F	N	C	T	A	L	I	M	C	Y	S	K	P	L	C	P	P	C	1	1	1
1571	C	P	P	C	E	E	N	S	E	C	W	Q	S	P	T	C	R	S	K	*	L	C	P	P	C	1	1	1
1572	C	P	P	C	E	D	K	F	Y	C	F	K	F	Y	Q	C	N	I	F	H	Y	C	P	P	C	1	1	1
1573	C	P	P	C	E	*	M	F	N	C	V	I	L	T	*	C	F	K	Q	H	P	C	P	P	C	1	1	1
1574	C	P	P	C	E	S	L	G	R	C	*	H	S	Y	I	C	D	I	R	Q	L	C	P	P	C	1	1	1
1575	C	P	P	C	E	W	E	N	R	C	V	*	R	L	L	C	I	N	Y	Y	*	C	P	P	C	1	1	1
1576	C	P	P	C	E	F	T	F	S	C	Y	V	E	L	F	C	P	M	W	Q	E	C	P	P	C	1	1	1
1577	C	P	P	C	E	F	*	K	D	C	Y	L	I	K	K	C	F	Y	N	F	I	C	P	P	C	1	1	1
1578	C	P	P	C	D	T	I	P	F	C	W	L	P	H	T	C	M	S	T	D	L	C	P	P	C	1	1	1
1579	C	P	P	C	D	I	L	Y	F	C	I	F	L	S	Y	C	F	F	Y	Y	I	C	P	P	C	1	1	1
1580	C	P	P	C	D	I	L	M	T	C	I	D	L	T	Y	C	H	N	R	M	P	C	P	P	C	1	1	1
1581	C	P	P	C	D	Q	T	Y	Y	C	I	I	S	I	N	C	S	S	A	N	S	C	P	P	C	1	1	1
1582	C	P	P	C	D	P	P	N	L	C	Y	G	Y	Y	Q	C	I	R	D	F	Y	C	P	P	C	1	1	1
1583	C	P	P	C	D	R	V	V	L	C	A	R	K	I	R	C	H	M	A	S	P	C	P	P	C	1	1	1
1584	C	P	P	C	D	L	Y	Y	F	C	I	M	H	H	R	C	N	I	S	H	L	C	P	P	C	1	1	1
1585	C	P	P	C	D	L	F	T	R	C	N	Y	S	W	L	C	G	G	F	I	E	C	P	P	C	1	1	1
1586	C	P	P	C	D	L	L	Q	N	C	H	Y	T	S	P	C	N	I	H	H	P	C	P	P	C	1	1	1
1587	C	P	P	C	D	D	L	D	N	C	F	V	Y	N	F	C	P	Y	L	L	F	C	P	P	C	1	1	1
1588	C	P	P	C	D	G	L	T	L	C	D	Y	K	T	V	C	L	F	S	F	K	C	P	P	C	1	1	1
1589	C	P	P	C	D	G	E	I	I	C	Y	T	T	S	Q	C	I	T	S	L	Y	C	P	P	C	1	1	1
1590	C	P	P	C	D	G	D	F	W	C	H	Y	K	S	D	C	K	T	M	I	I	C	P	P	C	1	1	1
1591	C	P	P	C	D	V	*	F	R	C	F	F	Q	I	H	C	F	Y	I	L	Y	C	P	P	C	1	1	1
1592	C	P	P	C	D	*	H	F	Y	C	N	L	F	F	T	C	Y	S	H	F	Y	C	P	P	C	1	1	1
1593	C	P	P	C	D	Y	I	L	S	C	F	N	I	Y	F	C	I	N	Y	L	T	C	P	P	C	1	1	1
1594	C	P	P	C	D	Y	Y	Q	I	C	F	F	R	F	H	C	I	Y	I	F	Y	C	P	P	C	1	1	1
1595	C	P	P	C	D	Y	F	*	N	C	N	D	I	I	F	C	Y	S	N	F	F	C	P	P	C	1	1	1
1596	C	P	P	C	D	S	P	L	W	C	R	L	L	Y	Y	C	M	T	M	F	Y	C	P	P	C	1	1	1
1597	C	P	P	C	D	W	T	G	I	C	R	F	L	F	M	C	Y	N	H	I	T	C	P	P	C	1	1	1
1598	C	P	P	C	D	W	S	I	F	C	F	Y	S	Y	W	C	I	F	Y	N	L	C	P	P	C	1	1	1
1599	C	P	P	C	D	F	R	L	P	C	H	L	T	P	K	C	L	Y	F	N	S	C	P	P	C	1	1	1
1600	C	P	P	C	A	N	K	I	I	C	Y	F	F	S	F	C	N	F	N	Y	Y	C	P	P	C	1	1	1
1601	C	P	P	C	A	N	I	Y	G	C	L	L	S	S	L	C	A	N	V	Q	Y	C	P	P	C	1	1	1
1602	C	P	P	C	A	N	Y	F	H	C	F	N	*	F	P	C	N	Y	F	H	Y	C	P	P	C	1	1	1
1603	C	P	P	C	A	T	Y	D	V	C	E	G	R	K	T	C	L	K	*	N	A	C	P	P	C	1	1	1
1604	C	P	P	C	A	R	T	K	Q	C	*	K	R	L	F	C	I	Y	K	L	S	C	P	P	C	1	1	1
1605	C	P	P	C	A	Q	P	P	Y	C	K	F	F	N	I	C	S	N	D	N	F	C	P	P	C	1	1	1
1606	C	P	P	C	A	P	H	L	L	C	N	A	S	S	S	C	P	P	K	N	K	C	P	P	C	1	1	1
1607	C	P	P	C	A	R	S	L	N	C	S	F	K	H	N	C	I	D	L	S	Q	C	P	P	C	1	1	1
1608	C	P	P	C	A	L	Y	I	P	C	S	T	Y	P	L	C	H	N	R	G	K	C	P	P	C	1	1	1
1609	C	P	P	C	A	L	Y	I	P	C	S	T	Y	P	L	C	H	N	R	W	K	C	P	P	C	1	1	1
1610	C	P	P	C	A	G	H	I	G	C	P	P	F	F	Y	C	V	S	R	P	L	C	P	P	C	1	1	1
1611	C	P	P	C	A	V	Y	L	N	C	S	I	H	S	F	C	H	N	L	I	H	C	P	P	C	1	1	1
1612	C	P	P	C	A	*	R	S	A	C	H	N	P	S	T	C	S	I	P	Y	D	C	P	P	C	1	1	1
1613	C	P	P	C	A	F	Q	Q	N	C	T	I	T	E	N	C	Y	T	N	M	P	C	P	P	C	1	1	1
1614	C	P	P	C	A	F	V	L	G	C	R	R	I	N	S	C	L	G	Q	P	I	C	P	P	C	1	1	1
1615	C	P	P	C	A	K	F	L	N	C	M	N	F	T	K	C	A	N	F	F	L	C	P	P	C	1	1	1
1616	C	P	P	C	A	T	R	N	I	C	P	S	I	*	Y	C	F	H	L	T	H	C	P	P	C	1	1	1
1617	C	P	P	C	A	R	L	E	L	C	N	S	R	S	G	C	F	D	*	L	P	C	P	P	C	1	1	1
1618	C	P	P	C	A	R	L	E	L	C	N	S	M	R	G	C	F	D	*	L	P	C	P	P	C	1	1	1
1619	C	P	P	C	A	R	L	E	L	C	T	S	M	S	G	C	F	D	*	L	P	C	P	P	C	1	1	1
1620	C	P	P	C	A	I	L	S	T	C	F	V	M	N	N	C	S	F	F	E	F	C	P	P	C	1	1	1
1621	C	P	P	C	A	H	I	G	R	C	H	S	Y	L	P	C	Q	S	M	Y	R	C	P	P	C	1	1	1
1622	C	P	P	C	A	H	L	S	R	C	L	T	S	L	R	C	L	L	R	M	Y	C	P	P	C	1	1	1
1623	C	P	P	C	A	P	M	W	P	C	S	N	P	S	W	C	Y	Y	I	F	K	C	P	P	C	1	1	1
1624	C	P	P	C	A	P	M	W	P	C	S	N	P	S	W	C	Y	Y	I	F	K	C	P	P	C	1	1	1
1625	C	P	P	C	A	P	M	W	P	C	S	N	P	R	W	C	Y	Y	I	F	K	C	P	P	C	1	1	1
1626	C	P	P	C	A	P	M	W	P	C	S	N	P	S	G	C	Y	Y	I	F	K	C	P	P	C	1	1	1
1627	C	P	P	C	A	P	M	W	P	C	S	N	P	S	W	C	D	Y	I	F	K	C	P	P	C	1	1	1
1628	C	P	P	C	A	P	M	W	P	C	S	N	P	S	W	C	Y	Y	I	V	K	C	P	P	C	1	1	1
1629	C	P	P	C	A	L	N	S	H	C	*	Q	S	N	L	C	R	E	L	Q	F	C	P	P	C	1	1	1
1630	C	P	P	C	A	E	S	M	K	C	Y	Y	L	I	D	C	N	R	T	K	K	C	P	P	C	1	1	1
1631	C	P	P	C	A	D	V	I	Y	C	T	Q	F	R	P	C	F	N	N	R	T	C	P	P	C	1	1	1
1632	C	P	P	C	A	G	P	S	Q	C	Y	S	S	I	R	C	S	M	F	K	L	C	P	P	C	1	1	1
1633	C	P	P	C	A	*	S	F	H	C	D	F	Y	H	T	C	I	I	I	H	S	C	P	P	C	1	1	1
1634	C	P	P	C	A	Y	S	F	N	C	N	N	T	M	M	C	Y	N	F	I	F	C	P	P	C	1	1	1
1635	C	P	P	C	A	L	F	*	E	C	Y	I	F	T	N	C	I	Y	N	*	N	C	P	P	C	1	1	1
1636	C	P	P	C	A	F	Y	R	V	C	L	N	F	I	I	C	N	F	N	F	F	C	P	P	C	1	1	1
1637	C	P	P	C	G	N	M	A	L	C	K	L	M	K	Y	C	S	F	I	L	R	C	P	P	C	1	1	1
1638	C	P	P	C	G	N	F	L	R	C	N	S	K	P	E	C	N	P	H	S	F	C	P	P	C	1	1	1
1639	C	P	P	C	G	T	R	M	S	C	N	P	T	Y	P	C	S	N	M	G	R	C	P	P	C	1	1	1
1640	C	P	P	C	G	T	H	H	Q	C	W	Q	V	L	P	C	M	G	K	V	R	C	P	P	C	1	1	1
1641	C	P	P	C	G	R	I	I	S	C	L	Q	L	P	A	C	L	L	R	L	L	C	P	P	C	1	1	1
1642	C	P	P	C	G	I	D	L	M	C	H	P	R	S	N	C	I	Q	I	P	T	C	P	P	C	1	1	1
1643	C	P	P	C	G	Q	V	Q	V	C	L	F	Q	M	K	C	G	T	N	Y	F	C	P	P	C	1	1	1
1644	C	P	P	C	G	H	T	T	S	C	*	H	I	H	P	C	Y	N	K	T	M	C	P	P	C	1	1	1
1645	C	P	P	C	G	H	A	P	V	C	L	S	K	S	M	C	P	P	N	*	W	C	P	P	C	1	1	1
1646	C	P	P	C	G	P	*	S	T	C	G	V	P	P	L	C	H	N	R	N	N	C	P	P	C	1	1	1
1647	C	P	P	C	G	P	S	L	I	C	A	V	R	E	S	C	E	D	A	S	G	C	P	P	C	1	1	1
1648	C	P	P	C	G	P	S	W	I	C	A	V	R	E	S	C	E	D	A	S	G	C	P	P	C	1	1	1
1649	C	P	P	C	G	P	S	L	S	C	A	V	R	E	S	C	E	D	A	S	G	C	P	P	C	1	1	1
1650	C	P	P	C	G	R	N	D	S	C	I	P	M	H	F	C	R	L	L	S	T	C	P	P	C	1	1	1
1651	C	P	P	C	G	G	I	E	H	C	V	N	F	H	H	C	I	F	M	L	I	C	P	P	C	1	1	1
1652	C	P	P	C	G	V	Y	N	S	C	M	V	S	N	F	C	L	S	N	M	E	C	P	P	C	1	1	1
1653	C	P	P	C	G	V	G	R	I	C	D	N	T	S	K	C	S	S	M	I	A	C	P	P	C	1	1	1
1654	C	P	P	C	G	Y	M	K	I	C	*	S	T	I	F	C	N	I	Y	L	A	C	P	P	C	1	1	1
1655	C	P	P	C	G	Y	*	D	E	C	S	K	A	F	M	C	T	R	L	T	F	C	P	P	C	1	1	1
1656	C	P	P	C	G	S	I	G	P	C	I	S	E	L	M	C	A	F	A	Y	T	C	P	P	C	1	1	1
1657	C	P	P	C	G	W	A	F	L	C	P	D	L	W	S	C	G	T	P	L	R	C	P	P	C	1	1	1
1658	C	P	P	C	G	W	G	P	R	C	P	L	Q	S	L	C	Y	I	P	L	L	C	P	P	C	1	1	1
1659	C	P	P	C	G	L	G	N	Y	C	I	H	N	F	H	C	N	I	I	I	N	C	P	P	C	1	1	1
1660	C	P	P	C	G	T	Q	*	Y	C	*	R	E	S	Y	C	P	I	I	W	V	C	P	P	C	1	1	1
1661	C	P	P	C	G	T	F	R	L	C	I	W	T	K	A	C	N	Y	S	L	F	C	P	P	C	1	1	1
1662	C	P	P	C	G	S	L	K	W	C	S	S	P	S	H	C	A	S	L	S	L	C	P	P	C	1	1	1
1663	C	P	P	C	G	S	G	L	W	C	L	E	L	F	N	C	T	A	Q	I	S	C	P	P	C	1	1	1
1664	C	P	P	C	G	M	M	*	*	C	T	Y	W	R	I	C	S	V	N	L	K	C	P	P	C	1	1	1
1665	C	P	P	C	G	M	E	Y	R	C	G	K	S	T	M	C	T	N	F	Q	L	C	P	P	C	1	1	1
1666	C	P	P	C	G	I	Q	H	W	C	L	S	T	T	S	C	A	P	Y	F	R	C	P	P	C	1	1	1
1667	C	P	P	C	G	I	R	H	W	C	L	S	T	T	S	C	A	L	Y	F	R	C	P	P	C	1	1	1
1668	C	P	P	C	G	I	G	L	W	C	L	E	L	F	N	C	T	A	H	I	S	C	P	P	C	1	1	1
1669	C	P	P	C	G	I	V	D	I	C	T	H	T	H	T	C	H	I	H	I	S	C	P	P	C	1	1	1
1670	C	P	P	C	G	I	V	L	W	C	R	P	L	A	P	C	D	T	P	R	S	C	P	P	C	1	1	1
1671	C	P	P	C	G	I	*	S	T	C	A	L	I	P	S	C	R	S	D	L	L	C	P	P	C	1	1	1
1672	C	P	P	C	G	H	P	R	F	C	L	T	T	S	P	C	I	I	Y	N	N	C	P	P	C	1	1	1
1673	C	P	P	C	G	H	*	P	R	C	P	D	K	L	S	C	F	A	A	K	A	C	P	P	C	1	1	1
1674	C	P	P	C	G	H	S	L	S	C	S	V	H	M	R	C	L	F	L	T	A	C	P	P	C	1	1	1
1675	C	P	P	C	G	P	T	V	P	C	A	H	W	K	I	C	W	S	L	H	F	C	P	P	C	1	1	1
1676	C	P	P	C	G	P	S	L	S	C	S	V	H	M	R	C	L	F	L	T	A	C	P	P	C	1	1	1
1677	C	P	P	C	G	R	R	Y	V	C	I	L	S	K	K	C	Y	P	Y	T	N	C	P	P	C	1	1	1
1678	C	P	P	C	G	R	Y	S	I	C	D	I	K	L	S	C	I	N	L	S	N	C	P	P	C	1	1	1
1679	C	P	P	C	G	R	S	R	S	C	S	V	H	M	R	C	L	F	L	T	A	C	P	P	C	1	1	1
1680	C	P	P	C	G	R	S	L	S	C	S	V	H	M	R	C	L	F	S	T	A	C	P	P	C	1	1	1
1681	C	P	P	C	G	R	S	L	S	C	S	V	H	M	R	C	L	F	F	T	A	C	P	P	C	1	1	1
1682	C	P	P	C	G	R	S	L	S	C	S	V	H	M	G	C	L	F	L	T	A	C	P	P	C	1	1	1
1683	C	P	P	C	G	R	S	L	S	C	S	V	H	L	R	C	L	F	L	T	A	C	P	P	C	1	1	1
1684	C	P	P	C	G	R	S	L	S	C	S	V	Y	M	R	C	L	F	L	T	A	C	P	P	C	1	1	1
1685	C	P	P	C	G	R	S	N	R	C	S	T	L	P	L	C	L	F	L	R	Y	C	P	P	C	1	1	1
1686	C	P	P	C	G	L	G	G	L	C	G	R	R	L	S	C	L	T	P	M	S	C	P	P	C	1	1	1
1687	C	P	P	C	G	L	G	D	A	C	P	E	R	M	V	C	D	L	S	N	G	C	P	P	C	1	1	1
1688	C	P	P	C	G	L	G	D	A	C	P	E	R	M	V	C	D	L	S	N	G	C	P	P	C	1	1	1
1689	C	P	P	C	G	L	S	L	S	C	S	V	H	M	R	C	L	F	L	T	A	C	P	P	C	1	1	1
1690	C	P	P	C	G	G	N	Y	A	C	F	S	N	F	N	C	L	N	K	Y	L	C	P	P	C	1	1	1
1691	C	P	P	C	G	G	Q	S	R	C	L	K	K	H	W	C	S	M	H	T	H	C	P	P	C	1	1	1
1692	C	P	P	C	G	G	S	S	*	C	L	I	M	I	H	C	S	I	M	Y	N	C	P	P	C	1	1	1
1693	C	P	P	C	G	V	W	S	R	C	D	L	M	F	N	C	H	P	I	L	M	C	P	P	C	1	1	1
1694	C	P	P	C	G	Y	W	Q	L	C	T	D	T	M	N	C	Y	P	F	S	W	C	P	P	C	1	1	1
1695	C	P	P	C	G	Y	F	L	R	C	F	P	H	S	P	C	L	D	F	N	Q	C	P	P	C	1	1	1
1696	C	P	P	C	G	S	E	N	V	C	Q	S	L	V	F	C	I	A	L	D	E	C	P	P	C	1	1	1
1697	C	P	P	C	G	S	S	Y	E	C	I	T	I	G	K	C	A	S	N	V	S	C	P	P	C	1	1	1
1698	C	P	P	C	G	F	F	E	P	C	I	S	I	H	L	C	Y	F	Y	N	Q	C	P	P	C	1	1	1
1699	C	P	P	C	V	T	N	T	N	C	P	Y	K	H	S	C	F	N	W	L	N	C	P	P	C	1	1	1
1700	C	P	P	C	V	S	P	R	L	C	F	*	M	R	L	C	L	S	V	I	A	C	P	P	C	1	1	1
1701	C	P	P	C	V	I	T	K	Y	C	F	I	N	Y	I	C	F	F	I	M	H	C	P	P	C	1	1	1
1702	C	P	P	C	V	I	H	D	S	C	Y	N	Y	I	Y	C	N	I	T	Y	H	C	P	P	C	1	1	1
1703	C	P	P	C	V	I	H	D	S	C	Y	N	Y	I	S	C	N	I	T	Y	H	C	P	P	C	1	1	1
1704	C	P	P	C	V	I	H	D	S	C	Y	N	Y	L	Y	C	N	I	T	Y	H	C	P	P	C	1	1	1
1705	C	P	P	C	V	I	L	L	R	C	H	Q	N	F	N	C	V	Y	N	I	V	C	P	P	C	1	1	1
1706	C	P	P	C	V	I	L	L	R	C	H	Q	N	F	N	C	V	Y	T	I	D	C	P	P	C	1	1	1
1707	C	P	P	C	V	P	Y	N	N	C	T	T	S	Y	N	C	T	R	E	T	I	C	P	P	C	1	1	1
1708	C	P	P	C	V	P	Y	N	N	C	T	T	S	Y	N	C	T	R	A	T	I	C	P	P	C	1	1	1
1709	C	P	P	C	V	G	L	G	R	C	R	S	V	S	I	C	T	F	Y	N	I	C	P	P	C	1	1	1
1710	C	P	P	C	V	G	V	R	R	C	V	Y	M	T	S	C	I	I	L	R	N	C	P	P	C	1	1	1
1711	C	P	P	C	V	G	F	R	R	C	G	Y	M	T	S	C	I	I	L	R	N	C	P	P	C	1	1	1
1712	C	P	P	C	V	G	F	R	R	C	V	Y	M	T	A	C	I	I	L	R	N	C	P	P	C	1	1	1
1713	C	P	P	C	V	G	F	R	R	C	V	Y	M	T	S	C	T	I	L	R	N	C	P	P	C	1	1	1
1714	C	P	P	C	V	G	F	R	R	C	V	Y	M	T	S	C	I	M	L	R	N	C	P	P	C	1	1	1
1715	C	P	P	C	V	G	F	R	R	C	V	Y	M	T	S	C	I	I	L	R	D	C	P	P	C	1	1	1
1716	C	P	P	C	V	G	F	R	R	C	V	Y	M	T	S	C	I	L	L	R	N	C	P	P	C	1	1	1
1717	C	P	P	C	V	G	F	R	R	C	V	Y	M	T	S	C	L	I	L	R	N	C	P	P	C	1	1	1
1718	C	P	P	C	V	G	F	R	R	C	V	S	M	T	S	C	I	I	L	R	N	C	P	P	C	1	1	1
1719	C	P	P	C	V	G	F	R	X	C	V	Y	M	T	S	C	I	I	L	R	N	C	P	P	C	1	1	1
1720	C	P	P	C	V	S	L	D	L	C	N	I	Y	N	L	C	Y	T	V	N	I	C	P	P	C	1	1	1
1721	C	P	P	C	V	S	L	D	L	C	N	I	Y	N	L	C	Y	T	L	N	L	C	P	P	C	1	1	1
1722	C	P	P	C	V	S	L	D	L	C	N	I	Y	N	L	C	Y	T	L	T	I	C	P	P	C	1	1	1
1723	C	P	P	C	V	S	L	D	L	C	N	I	Y	N	L	C	Y	T	L	D	I	C	P	P	C	1	1	1
1724	C	P	P	C	V	S	L	D	L	C	N	I	Y	N	L	C	S	T	L	N	I	C	P	P	C	1	1	1
1725	C	P	P	C	V	S	L	A	L	C	N	I	Y	N	L	C	Y	T	M	N	I	C	P	P	C	1	1	1
1726	C	P	P	C	V	L	L	L	I	C	T	S	L	T	L	C	Y	Y	L	N	M	C	P	P	C	1	1	1
1727	C	P	P	C	V	K	P	S	I	C	T	N	S	I	L	C	V	N	L	S	P	C	P	P	C	1	1	1
1728	C	P	P	C	V	K	D	L	N	C	Y	N	I	S	L	C	Y	S	Y	P	N	C	P	P	C	1	1	1
1729	C	P	P	C	V	K	Y	L	K	C	Y	N	I	S	L	C	Y	S	Y	P	N	C	P	P	C	1	1	1
1730	C	P	P	C	V	K	Y	L	T	C	Y	N	I	S	L	C	Y	S	Y	P	N	C	P	P	C	1	1	1
1731	C	P	P	C	V	N	P	F	Y	C	F	F	F	L	T	C	I	F	L	D	T	C	P	P	C	1	1	1
1732	C	P	P	C	V	T	T	A	Y	C	V	L	Q	W	F	C	F	D	F	Y	I	C	P	P	C	1	1	1
1733	C	P	P	C	V	T	R	F	M	C	S	T	K	L	I	C	Y	S	F	R	M	C	P	P	C	1	1	1
1734	C	P	P	C	V	S	K	F	T	C	M	D	H	F	F	C	Y	I	L	*	D	C	P	P	C	1	1	1
1735	C	P	P	C	V	S	S	E	Y	C	S	Y	T	K	A	C	S	S	R	V	L	C	P	P	C	1	1	1
1736	C	P	P	C	V	I	L	F	Q	C	H	R	P	S	L	C	L	Q	S	G	I	C	P	P	C	1	1	1
1737	C	P	P	C	V	I	G	L	W	C	L	E	L	F	N	C	T	A	Q	I	S	C	P	P	C	1	1	1
1738	C	P	P	C	V	Q	T	Y	Y	C	I	I	S	I	N	C	G	S	A	N	F	C	P	P	C	1	1	1
1739	C	P	P	C	V	Q	T	Y	Y	C	I	I	S	I	T	C	S	S	A	N	F	C	P	P	C	1	1	1
1740	C	P	P	C	V	Q	T	Y	S	C	I	I	S	I	N	C	S	S	A	N	F	C	P	P	C	1	1	1
1741	C	P	P	C	V	H	K	K	E	C	Y	P	P	S	S	C	M	I	Y	V	V	C	P	P	C	1	1	1
1742	C	P	P	C	V	H	L	Q	L	C	N	Y	S	M	F	C	K	S	Y	A	G	C	P	P	C	1	1	1
1743	C	P	P	C	V	P	H	S	L	C	T	H	T	H	T	C	N	S	H	F	L	C	P	P	C	1	1	1
1744	C	P	P	C	V	P	P	L	L	C	Q	F	P	V	F	C	V	F	Y	T	K	C	P	P	C	1	1	1
1745	C	P	P	C	V	L	S	D	S	C	N	M	S	S	P	C	Q	F	H	G	T	C	P	P	C	1	1	1
1746	C	P	P	C	V	E	F	L	N	C	N	N	T	H	L	C	T	T	L	K	T	C	P	P	C	1	1	1
1747	C	P	P	C	V	D	V	L	N	C	N	F	P	S	P	C	R	H	N	Q	S	C	P	P	C	1	1	1
1748	C	P	P	C	V	A	S	D	Q	C	Y	L	P	N	S	C	L	H	K	H	I	C	P	P	C	1	1	1
1749	C	P	P	C	V	A	F	L	K	C	N	N	T	H	L	C	T	T	L	K	T	C	P	P	C	1	1	1
1750	C	P	P	C	V	A	F	L	N	C	N	N	T	H	L	C	T	T	L	N	T	C	P	P	C	1	1	1
1751	C	P	P	C	V	A	F	L	N	C	N	N	T	H	L	C	T	T	F	K	T	C	P	P	C	1	1	1
1752	C	P	P	C	V	A	F	L	N	C	N	N	T	H	L	C	P	T	L	K	T	C	P	P	C	1	1	1
1753	C	P	P	C	V	A	F	L	N	C	N	N	T	R	L	C	T	T	L	K	T	C	P	P	C	1	1	1
1754	C	P	P	C	V	A	F	L	N	C	N	N	T	L	L	C	T	T	L	K	T	C	P	P	C	1	1	1
1755	C	P	P	C	V	A	F	F	N	C	N	N	T	H	L	C	T	T	L	K	T	C	P	P	C	1	1	1
1756	C	P	P	C	V	G	A	R	T	C	D	Y	L	S	N	C	R	T	I	Q	D	C	P	P	C	1	1	1
1757	C	P	P	C	V	Y	Q	N	R	C	H	V	T	H	N	C	P	D	L	*	R	C	P	P	C	1	1	1
1758	C	P	P	C	V	Y	S	N	M	C	F	H	I	P	P	C	N	F	H	I	K	C	P	P	C	1	1	1
1759	C	P	P	C	V	Y	F	Y	I	C	H	L	T	L	I	C	Y	F	V	I	I	C	P	P	C	1	1	1
1760	C	P	P	C	V	S	Y	K	*	C	I	P	N	M	P	C	N	D	F	R	T	C	P	P	C	1	1	1
1761	C	P	P	C	V	S	L	K	L	C	G	R	W	G	W	C	Y	L	E	I	S	C	P	P	C	1	1	1
1762	C	P	P	C	V	W	L	H	G	C	P	*	R	N	H	C	L	Y	K	V	L	C	P	P	C	1	1	1
1763	C	P	P	C	V	F	*	M	M	C	A	D	Q	K	H	C	R	I	R	I	N	C	P	P	C	1	1	1
1764	C	P	P	C	*	N	D	T	W	C	I	P	F	H	H	C	F	F	H	*	M	C	P	P	C	1	1	1
1765	C	P	P	C	*	T	R	S	R	C	F	T	L	V	L	C	I	R	Q	F	Y	C	P	P	C	1	1	1
1766	C	P	P	C	*	T	L	I	V	C	R	N	F	S	Y	C	F	L	Y	S	T	C	P	P	C	1	1	1
1767	C	P	P	C	*	T	V	S	D	C	S	S	L	Y	F	C	N	R	T	H	I	C	P	P	C	1	1	1
1768	C	P	P	C	*	T	Y	V	I	C	F	N	I	N	L	C	I	S	N	Y	N	C	P	P	C	1	1	1
1769	C	P	P	C	*	I	F	S	F	C	I	S	F	F	F	C	N	I	N	N	Y	C	P	P	C	1	1	1
1770	C	P	P	C	*	H	N	L	H	C	F	N	T	Y	L	C	N	Y	M	L	I	C	P	P	C	1	1	1
1771	C	P	P	C	*	R	Y	T	L	C	Y	Y	I	S	D	C	I	Y	I	F	Y	C	P	P	C	1	1	1
1772	C	P	P	C	*	E	S	T	K	C	S	P	Q	V	L	C	R	L	V	N	I	C	P	P	C	1	1	1
1773	C	P	P	C	*	D	F	L	F	C	D	I	H	I	I	C	N	R	T	Q	H	C	P	P	C	1	1	1
1774	C	P	P	C	*	A	P	K	R	C	L	N	R	T	L	C	F	T	F	I	I	C	P	P	C	1	1	1
1775	C	P	P	C	*	A	P	K	R	C	L	N	R	M	L	C	F	T	F	I	I	C	P	P	C	1	1	1
1776	C	P	P	C	*	A	S	V	I	C	F	A	A	Y	M	C	*	T	H	S	F	C	P	P	C	1	1	1
1777	C	P	P	C	*	V	I	L	I	C	F	S	H	T	L	C	Q	I	I	L	F	C	P	P	C	1	1	1
1778	C	P	P	C	*	Y	Q	M	Y	C	Y	F	S	I	I	C	F	N	I	Y	F	C	P	P	C	1	1	1
1779	C	P	P	C	*	Y	Y	Y	Y	C	F	K	L	F	D	C	L	Y	F	T	I	C	P	P	C	1	1	1
1780	C	P	P	C	*	F	N	Y	N	C	Y	I	F	F	F	C	F	Y	Y	H	F	C	P	P	C	1	1	1
1781	C	P	P	C	*	F	I	S	G	C	F	N	L	I	F	C	E	R	V	Y	S	C	P	P	C	1	1	1
1782	C	P	P	C	*	F	I	S	W	C	V	N	L	I	F	C	E	R	L	Y	S	C	P	P	C	1	1	1
1783	C	P	P	C	*	F	S	V	H	C	Y	T	Y	S	I	C	S	S	L	N	S	C	P	P	C	1	1	1
1784	C	P	P	C	*	F	S	V	P	C	Y	T	Y	S	I	C	S	S	L	N	R	C	P	P	C	1	1	1
1785	C	P	P	C	*	F	S	S	H	C	N	N	N	F	P	C	F	L	S	Y	N	C	P	P	C	1	1	1
1786	C	P	P	C	Y	K	K	D	I	C	Y	Y	N	A	S	C	L	N	L	H	K	C	P	P	C	1	1	1
1787	C	P	P	C	Y	K	T	I	Q	C	S	P	M	F	M	C	I	Y	T	N	S	C	P	P	C	1	1	1
1788	C	P	P	C	Y	K	T	I	Q	C	S	P	I	V	M	C	I	Y	T	N	S	C	P	P	C	1	1	1
1789	C	P	P	C	Y	K	I	H	F	C	R	F	P	T	H	C	Y	I	I	Y	N	C	P	P	C	1	1	1
1790	C	P	P	C	Y	N	I	L	N	C	D	Y	R	I	P	C	L	T	Y	K	Y	C	P	P	C	1	1	1
1791	C	P	P	C	Y	N	H	R	Y	C	F	T	L	I	Q	C	I	I	T	S	F	C	P	P	C	1	1	1
1792	C	P	P	C	Y	N	V	W	F	C	F	H	Y	Y	H	C	M	N	*	S	T	C	P	P	C	1	1	1
1793	C	P	P	C	Y	N	Y	F	F	C	N	N	R	S	I	C	N	N	*	N	N	C	P	P	C	1	1	1
1794	C	P	P	C	Y	N	S	I	*	C	F	S	I	I	F	C	F	F	N	N	S	C	P	P	C	1	1	1
1795	C	P	P	C	Y	T	Q	Y	N	C	S	F	S	S	T	C	Y	K	I	H	L	C	P	P	C	1	1	1
1796	C	P	P	C	Y	R	I	I	Y	C	M	S	L	N	I	C	S	L	R	I	*	C	P	P	C	1	1	1
1797	C	P	P	C	Y	R	I	I	S	C	M	S	L	N	I	C	S	L	R	I	*	C	P	P	C	1	1	1
1798	C	P	P	C	Y	S	Q	G	D	C	S	Y	P	P	V	C	D	S	A	P	F	C	P	P	C	1	1	1
1799	C	P	P	C	Y	S	S	V	G	C	R	T	S	F	Y	C	L	S	N	L	D	C	P	P	C	1	1	1
1800	C	P	P	C	Y	M	I	S	H	C	I	L	S	I	I	C	Y	N	H	L	S	C	P	P	C	1	1	1
1801	C	P	P	C	Y	I	K	F	I	C	L	F	V	M	I	C	F	Y	F	T	N	C	P	P	C	1	1	1
1802	C	P	P	C	Y	I	N	Y	I	C	L	F	V	M	I	C	F	Y	F	T	N	C	P	P	C	1	1	1
1803	C	P	P	C	Y	I	N	F	I	C	L	F	G	M	I	C	F	Y	F	T	N	C	P	P	C	1	1	1
1804	C	P	P	C	Y	I	N	F	I	C	L	F	V	R	I	C	F	Y	F	T	N	C	P	P	C	1	1	1
1805	C	P	P	C	Y	I	N	F	I	C	L	F	V	M	F	C	F	Y	F	T	N	C	P	P	C	1	1	1
1806	C	P	P	C	Y	I	N	F	I	C	L	F	V	L	I	C	F	Y	F	T	N	C	P	P	C	1	1	1
1807	C	P	P	C	Y	I	T	F	I	C	L	F	V	M	I	C	F	Y	F	T	N	C	P	P	C	1	1	1
1808	C	P	P	C	Y	I	T	F	Y	C	Y	L	F	H	F	C	Y	F	Y	N	F	C	P	P	C	1	1	1
1809	C	P	P	C	Y	I	T	F	Y	C	Y	L	F	H	F	C	Y	F	Y	H	F	C	P	P	C	1	1	1
1810	C	P	P	C	Y	I	M	K	S	C	H	S	N	N	T	C	I	I	L	N	N	C	P	P	C	1	1	1
1811	C	P	P	C	Y	I	I	K	Y	C	Y	T	N	I	V	C	Y	F	I	I	I	C	P	P	C	1	1	1
1812	C	P	P	C	Y	I	H	F	I	C	L	F	V	M	I	C	F	Y	F	T	N	C	P	P	C	1	1	1
1813	C	P	P	C	Y	I	Y	Y	H	C	F	Y	H	F	Y	C	N	I	Y	Y	I	C	P	P	C	1	1	1
1814	C	P	P	C	Y	I	S	Q	N	C	*	S	T	L	R	C	V	N	R	S	N	C	P	P	C	1	1	1
1815	C	P	P	C	Y	I	S	Q	T	C	*	S	T	L	R	C	F	N	R	S	N	C	P	P	C	1	1	1
1816	C	P	P	C	Y	I	F	S	F	C	I	S	F	F	F	C	N	I	N	N	Y	C	P	P	C	1	1	1
1817	C	P	P	C	Y	Q	P	N	L	C	N	F	*	N	T	C	F	F	M	*	L	C	P	P	C	1	1	1
1818	C	P	P	C	Y	H	N	S	F	C	N	T	L	N	H	C	Y	N	L	F	F	C	P	P	C	1	1	1
1819	C	P	P	C	Y	H	T	I	L	C	I	I	N	L	L	C	Y	I	F	Y	P	C	P	P	C	1	1	1
1820	C	P	P	C	Y	H	H	L	I	C	Y	I	Y	Y	Y	C	I	N	N	F	F	C	P	P	C	1	1	1
1821	C	P	P	C	Y	H	H	F	S	C	Y	I	Y	Y	Y	C	I	N	N	F	F	C	P	P	C	1	1	1
1822	C	P	P	C	Y	P	N	F	Y	C	L	N	S	H	S	C	Q	W	I	*	M	C	P	P	C	1	1	1
1823	C	P	P	C	Y	P	F	N	L	C	N	L	T	T	M	C	S	K	I	K	T	C	P	P	C	1	1	1
1824	C	P	P	C	Y	P	F	Y	N	C	T	T	L	L	A	C	N	I	L	N	Y	C	P	P	C	1	1	1
1825	C	P	P	C	Y	R	H	S	D	C	V	G	P	A	W	C	S	F	I	E	P	C	P	P	C	1	1	1
1826	C	P	P	C	Y	R	L	R	S	C	T	F	K	N	S	C	I	P	H	V	Q	C	P	P	C	1	1	1
1827	C	P	P	C	Y	L	L	N	G	C	F	N	I	D	F	C	I	E	N	Y	Y	C	P	P	C	1	1	1
1828	C	P	P	C	Y	L	F	*	Y	C	F	Y	Y	F	F	C	Y	F	T	N	Y	C	P	P	C	1	1	1
1829	C	P	P	C	Y	E	L	H	P	C	N	Y	L	I	N	C	M	S	L	N	S	C	P	P	C	1	1	1
1830	C	P	P	C	Y	D	Y	Y	M	C	F	N	Y	T	S	C	I	N	Q	I	I	C	P	P	C	1	1	1
1831	C	P	P	C	Y	V	E	P	*	C	V	L	*	N	I	C	R	L	S	Y	D	C	P	P	C	1	1	1
1832	C	P	P	C	Y	V	F	I	F	C	Y	I	H	F	N	C	N	I	I	I	F	C	P	P	C	1	1	1
1833	C	P	P	C	Y	Y	Q	N	I	C	I	F	N	L	H	C	F	Y	Q	N	Y	C	P	P	C	1	1	1
1834	C	P	P	C	Y	Y	A	A	D	C	I	T	L	S	H	C	S	F	V	D	S	C	P	P	C	1	1	1
1835	C	P	P	C	Y	Y	F	N	N	C	T	L	N	I	N	C	I	I	N	L	F	C	P	P	C	1	1	1
1836	C	P	P	C	Y	Y	F	T	Y	C	I	V	Y	N	R	C	I	L	N	D	T	C	P	P	C	1	1	1
1837	C	P	P	C	Y	S	F	E	K	C	I	L	Y	H	Q	C	L	N	N	F	H	C	P	P	C	1	1	1
1838	C	P	P	C	Y	S	L	L	R	C	L	V	Q	N	F	C	R	A	P	Y	F	C	P	P	C	1	1	1
1839	C	P	P	C	Y	F	N	S	F	C	Y	I	H	S	I	C	Y	N	H	H	Y	C	P	P	C	1	1	1
1840	C	P	P	C	Y	F	R	E	R	C	R	I	I	F	W	C	G	F	V	S	*	C	P	P	C	1	1	1
1841	C	P	P	C	Y	F	R	E	S	C	R	I	I	F	W	C	G	F	V	S	*	C	P	P	C	1	1	1
1842	C	P	P	C	Y	F	R	D	S	C	R	I	I	L	W	C	G	F	V	S	*	C	P	P	C	1	1	1
1843	C	P	P	C	Y	F	R	D	S	C	R	I	I	F	W	C	G	F	V	S	Q	C	P	P	C	1	1	1
1844	C	P	P	C	Y	F	R	D	S	C	R	I	I	F	W	C	G	F	V	S	Y	C	P	P	C	1	1	1
1845	C	P	P	C	Y	F	R	D	S	C	R	V	I	F	W	C	G	F	V	S	*	C	P	P	C	1	1	1
1846	C	P	P	C	Y	F	R	D	I	C	R	I	I	F	W	C	G	F	V	S	*	C	P	P	C	1	1	1
1847	C	P	P	C	Y	F	S	D	S	C	R	I	I	F	W	C	G	F	V	S	*	C	P	P	C	1	1	1
1848	C	P	P	C	Y	F	M	D	S	C	R	I	I	F	W	C	G	F	V	S	*	C	P	P	C	1	1	1
1849	C	P	P	C	Y	F	G	D	S	C	R	I	I	F	W	C	G	F	V	S	*	C	P	P	C	1	1	1
1850	C	P	P	C	Y	F	*	P	N	C	Y	E	I	Y	S	C	N	F	P	I	K	C	P	P	C	1	1	1
1851	C	P	P	C	Y	F	Y	V	*	C	Y	N	L	S	T	C	I	N	L	D	Y	C	P	P	C	1	1	1
1852	C	P	P	C	S	N	L	I	L	C	F	N	H	H	V	C	N	L	T	N	P	C	P	P	C	1	1	1
1853	C	P	P	C	S	M	T	Y	Y	C	P	R	K	D	Y	C	I	H	F	F	P	C	P	P	C	1	1	1
1854	C	P	P	C	S	M	S	S	P	C	S	H	L	Y	M	C	T	N	F	Y	F	C	P	P	C	1	1	1
1855	C	P	P	C	S	L	R	R	D	C	R	S	S	T	N	C	S	I	I	Y	Q	C	P	P	C	1	1	1
1856	C	P	P	C	S	L	S	R	D	C	R	S	S	T	K	C	S	I	I	Y	Q	C	P	P	C	1	1	1
1857	C	P	P	C	S	L	S	R	D	C	R	S	S	T	K	C	S	I	L	Y	Q	C	P	P	C	1	1	1
1858	C	P	P	C	S	L	S	R	D	C	R	S	S	T	N	C	S	S	I	Y	Q	C	P	P	C	1	1	1
1859	C	P	P	C	S	L	R	R	D	C	R	S	S	T	N	C	S	I	I	Y	Q	C	P	P	C	1	1	1
1860	C	P	P	C	S	D	M	L	P	C	Y	*	H	N	K	C	S	N	L	V	Y	C	P	P	C	1	1	1
1861	C	P	P	C	S	D	V	Y	V	C	N	L	T	L	P	C	Y	N	W	I	S	C	P	P	C	1	1	1
1862	C	P	P	C	S	D	F	M	L	C	K	L	Y	L	S	C	N	T	A	L	N	C	P	P	C	1	1	1
1863	C	P	P	C	S	A	I	F	V	C	I	H	S	F	S	C	M	I	H	K	N	C	P	P	C	1	1	1
1864	C	P	P	C	S	V	A	S	V	C	S	G	L	N	I	C	I	F	L	G	S	C	P	P	C	1	1	1
1865	C	P	P	C	S	Y	I	I	L	C	I	D	Y	I	S	C	I	N	F	Y	H	C	P	P	C	1	1	1
1866	C	P	P	C	S	Y	P	F	P	C	F	G	P	I	Q	C	L	D	Q	F	D	C	P	P	C	1	1	1
1867	C	P	P	C	S	S	F	Y	F	C	F	N	Y	Y	F	C	S	S	N	L	Y	C	P	P	C	1	1	1
1868	C	P	P	C	S	L	Y	H	N	C	S	N	I	N	Y	C	N	F	S	Y	H	C	P	P	C	1	1	1
1869	C	P	P	C	S	F	L	M	N	C	F	F	S	H	L	C	F	N	Y	F	S	C	P	P	C	1	1	1
1870	C	P	P	C	S	N	N	L	N	C	Y	A	T	I	Y	C	H	F	L	L	Y	C	P	P	C	1	1	1
1871	C	P	P	C	S	N	S	L	Q	C	L	L	N	I	Q	C	I	K	L	S	R	C	P	P	C	1	1	1
1872	C	P	P	C	S	T	K	N	S	C	N	H	L	P	Y	C	L	F	L	H	T	C	P	P	C	1	1	1
1873	C	P	P	C	S	S	L	L	N	C	F	H	N	N	T	C	I	T	M	M	N	C	P	P	C	1	1	1
1874	C	P	P	C	S	S	L	L	N	C	F	H	N	N	T	C	I	T	M	M	N	C	P	P	C	1	1	1
1875	C	P	P	C	S	S	V	I	R	C	*	S	N	W	P	C	F	P	Q	R	Q	C	P	P	C	1	1	1
1876	C	P	P	C	S	S	Y	I	T	C	*	Y	L	K	T	C	S	Y	L	S	L	C	P	P	C	1	1	1
1877	C	P	P	C	S	M	G	I	T	C	N	K	T	N	I	C	L	T	N	K	F	C	P	P	C	1	1	1
1878	C	P	P	C	S	I	F	Y	F	C	F	Y	I	Y	I	C	F	F	N	F	L	C	P	P	C	1	1	1
1879	C	P	P	C	S	Q	D	M	L	C	N	F	T	T	E	C	F	I	S	N	H	C	P	P	C	1	1	1
1880	C	P	P	C	S	Q	D	M	L	C	N	F	T	T	D	C	F	I	S	K	H	C	P	P	C	1	1	1
1881	C	P	P	C	S	Q	D	M	L	C	N	F	T	T	D	C	F	I	S	N	Q	C	P	P	C	1	1	1
1882	C	P	P	C	S	Q	D	M	L	C	N	F	T	T	D	C	F	I	S	T	H	C	P	P	C	1	1	1
1883	C	P	P	C	S	Q	D	M	L	C	N	F	T	T	D	C	F	I	S	H	H	C	P	P	C	1	1	1
1884	C	P	P	C	S	H	I	I	Y	C	P	F	Y	S	L	C	L	I	I	N	Y	C	P	P	C	1	1	1
1885	C	P	P	C	S	H	I	F	F	C	N	I	S	L	L	C	I	Y	H	F	Y	C	P	P	C	1	1	1
1886	C	P	P	C	S	H	H	F	M	C	N	L	S	H	L	C	T	F	T	Y	D	C	P	P	C	1	1	1
1887	C	P	P	C	S	H	H	F	M	C	N	L	S	H	L	C	T	F	T	Y	D	C	P	P	C	1	1	1
1888	C	P	P	C	S	H	R	V	L	C	R	P	P	L	G	C	L	G	S	Q	P	C	P	P	C	1	1	1
1889	C	P	P	C	S	H	L	V	L	C	R	P	P	L	G	C	L	G	S	Q	P	C	P	P	C	1	1	1
1890	C	P	P	C	S	H	F	F	Y	C	Y	Y	F	I	*	C	I	I	Y	Y	N	C	P	P	C	1	1	1
1891	C	P	P	C	S	P	R	Y	F	C	V	H	N	N	S	C	Y	S	F	N	F	C	P	P	C	1	1	1
1892	C	P	P	C	S	P	S	G	E	C	F	L	N	V	R	C	P	L	I	Q	P	C	P	P	C	1	1	1
1893	C	P	P	C	S	L	L	F	L	C	N	Y	S	Q	Q	C	F	I	K	L	F	C	P	P	C	1	1	1
1894	C	P	P	C	S	L	Y	F	Y	C	F	T	I	F	F	C	F	I	N	S	Y	C	P	P	C	1	1	1
1895	C	P	P	C	S	L	N	T	L	C	T	N	F	L	F	C	Y	I	H	Y	S	C	P	P	C	1	1	1
1896	C	P	P	C	S	E	K	G	S	C	D	S	Q	L	L	C	L	I	M	P	L	C	P	P	C	1	1	1
1897	C	P	P	C	S	D	Q	F	M	C	N	L	S	H	L	C	T	F	T	Y	D	C	P	P	C	1	1	1
1898	C	P	P	C	S	D	H	L	M	C	N	L	S	H	L	C	T	F	T	Y	D	C	P	P	C	1	1	1
1899	C	P	P	C	S	D	H	V	M	C	N	L	S	H	L	C	T	F	T	Y	D	C	P	P	C	1	1	1
1900	C	P	P	C	S	D	H	Y	M	C	N	L	S	H	L	C	T	F	T	Y	D	C	P	P	C	1	1	1
1901	C	P	P	C	S	D	H	F	M	C	N	L	S	Q	L	C	T	F	T	Y	D	C	P	P	C	1	1	1
1902	C	P	P	C	S	D	H	F	M	C	N	L	S	H	L	C	S	F	T	Y	D	C	P	P	C	1	1	1
1903	C	P	P	C	S	D	H	F	M	C	N	L	F	H	L	C	T	F	T	Y	D	C	P	P	C	1	1	1
1904	C	P	P	C	S	D	H	F	M	C	T	L	S	H	L	C	T	F	T	Y	D	C	P	P	C	1	1	1
1905	C	P	P	C	S	D	H	F	I	C	N	L	S	H	L	C	T	F	T	Y	D	C	P	P	C	1	1	1
1906	C	P	P	C	S	D	H	F	L	C	N	L	S	H	L	C	T	F	T	Y	D	C	P	P	C	1	1	1
1907	C	P	P	C	S	D	G	Q	F	C	L	G	R	I	S	C	L	T	L	A	S	C	P	P	C	1	1	1
1908	C	P	P	C	S	G	R	V	G	C	V	M	R	P	S	C	M	Y	L	R	V	C	P	P	C	1	1	1
1909	C	P	P	C	S	G	R	V	G	C	V	M	R	P	S	C	M	S	L	R	V	C	P	P	C	1	1	1
1910	C	P	P	C	S	V	Y	I	F	C	Y	I	I	L	L	C	I	I	N	I	Y	C	P	P	C	1	1	1
1911	C	P	P	C	S	V	Y	I	F	C	Y	I	I	L	F	C	I	L	N	I	Y	C	P	P	C	1	1	1
1912	C	P	P	C	S	Y	T	N	N	C	I	L	M	P	S	C	I	S	S	Q	F	C	P	P	C	1	1	1
1913	C	P	P	C	S	Y	I	L	M	C	I	H	I	F	F	C	N	I	N	I	H	C	P	P	C	1	1	1
1914	C	P	P	C	S	Y	D	Y	A	C	Y	H	L	*	I	C	Q	F	L	M	N	C	P	P	C	1	1	1
1915	C	P	P	C	S	Y	Y	S	N	C	S	G	F	I	N	C	Y	F	I	N	N	C	P	P	C	1	1	1
1916	C	P	P	C	S	Y	F	M	I	C	Y	S	N	H	*	C	L	F	L	Y	S	C	P	P	C	1	1	1
1917	C	P	P	C	S	S	K	H	I	C	S	Y	H	L	W	C	I	Y	L	N	H	C	P	P	C	1	1	1
1918	C	P	P	C	S	S	I	M	L	C	H	R	F	T	I	C	*	F	S	I	F	C	P	P	C	1	1	1
1919	C	P	P	C	S	S	Q	T	Y	C	F	N	N	Y	T	C	M	N	N	M	S	C	P	P	C	1	1	1
1920	C	P	P	C	S	W	T	P	W	C	P	K	L	S	S	C	E	F	H	P	T	C	P	P	C	1	1	1
1921	C	P	P	C	S	F	T	Q	F	C	H	F	P	T	I	C	Y	F	S	H	L	C	P	P	C	1	1	1
1922	C	P	P	C	S	F	I	K	R	C	D	N	T	L	I	C	P	R	H	F	L	C	P	P	C	1	1	1
1923	C	P	P	C	S	F	I	F	F	C	H	F	I	Y	I	C	N	N	I	V	N	C	P	P	C	1	1	1
1924	C	P	P	C	S	F	*	N	I	C	I	I	R	F	S	C	F	F	Y	L	I	C	P	P	C	1	1	1
1925	C	P	P	C	S	F	Y	N	N	C	N	S	S	K	N	C	I	F	N	*	L	C	P	P	C	1	1	1
1926	C	P	P	C	W	K	T	L	L	C	Q	D	S	Y	S	C	I	N	N	M	I	C	P	P	C	1	1	1
1927	C	P	P	C	W	K	G	G	T	C	L	A	R	K	S	C	P	Q	V	L	T	C	P	P	C	1	1	1
1928	C	P	P	C	W	N	N	S	S	C	F	D	K	H	L	C	G	L	A	F	H	C	P	P	C	1	1	1
1929	C	P	P	C	W	N	A	L	W	C	I	S	L	T	*	C	F	F	Q	V	T	C	P	P	C	1	1	1
1930	C	P	P	C	W	N	L	S	N	C	*	N	T	H	F	C	L	I	N	F	Y	C	P	P	C	1	1	1
1931	C	P	P	C	W	T	L	S	N	C	*	N	N	H	F	C	L	I	N	F	Y	C	P	P	C	1	1	1
1932	C	P	P	C	W	R	D	L	Y	C	F	K	N	T	G	C	K	N	I	P	I	C	P	P	C	1	1	1
1933	C	P	P	C	W	R	A	L	R	C	A	K	L	H	L	C	A	D	*	V	K	C	P	P	C	1	1	1
1934	C	P	P	C	W	R	G	S	R	C	W	A	S	I	Y	C	P	S	N	S	I	C	P	P	C	1	1	1
1935	C	P	P	C	W	S	M	S	L	C	A	R	T	T	E	C	W	K	F	N	T	C	P	P	C	1	1	1
1936	C	P	P	C	W	M	S	G	L	C	V	P	*	R	N	C	S	K	T	H	K	C	P	P	C	1	1	1
1937	C	P	P	C	W	I	M	R	K	C	F	N	K	T	S	C	F	D	L	F	N	C	P	P	C	1	1	1
1938	C	P	P	C	W	I	I	R	K	C	S	F	T	N	H	C	E	P	T	L	N	C	P	P	C	1	1	1
1939	C	P	P	C	W	Q	S	T	L	C	I	N	N	Y	T	C	H	R	I	F	S	C	P	P	C	1	1	1
1940	C	P	P	C	W	R	T	I	Q	C	F	N	T	Q	F	C	P	N	D	I	H	C	P	P	C	1	1	1
1941	C	P	P	C	W	R	A	A	L	C	S	T	G	P	P	C	S	Q	R	S	S	C	P	P	C	1	1	1
1942	C	P	P	C	W	L	D	Q	V	C	T	N	W	*	L	C	W	Y	R	K	V	C	P	P	C	1	1	1
1943	C	P	P	C	W	L	P	A	P	C	P	V	Q	L	V	C	S	E	A	V	S	C	P	P	C	1	1	1
1944	C	P	P	C	W	L	P	*	P	C	L	Q	P	R	I	C	L	R	Y	S	M	C	P	P	C	1	1	1
1945	C	P	P	C	W	L	D	Q	V	C	T	N	W	*	F	C	W	S	R	K	V	C	P	P	C	1	1	1
1946	C	P	P	C	W	L	F	S	H	C	F	Y	F	H	L	C	V	N	R	N	*	C	P	P	C	1	1	1
1947	C	P	P	C	W	D	N	N	N	C	*	Y	R	I	Y	C	F	N	N	L	N	C	P	P	C	1	1	1
1948	C	P	P	C	W	D	N	N	N	C	Y	D	R	I	Y	C	F	N	N	I	N	C	P	P	C	1	1	1
1949	C	P	P	C	W	D	N	N	N	C	Y	Y	R	I	Y	C	I	N	N	I	N	C	P	P	C	1	1	1
1950	C	P	P	C	W	D	N	N	N	C	Y	Y	R	I	Y	C	F	I	N	I	N	C	P	P	C	1	1	1
1951	C	P	P	C	W	D	N	N	N	C	S	Y	R	I	Y	C	F	N	N	I	N	C	P	P	C	1	1	1
1952	C	P	P	C	W	D	N	N	T	C	Y	Y	R	I	Y	C	F	N	N	I	N	C	P	P	C	1	1	1
1953	C	P	P	C	W	G	I	S	F	C	R	N	K	L	S	C	Y	I	L	S	S	C	P	P	C	1	1	1
1954	C	P	P	C	W	*	T	S	T	C	I	Y	S	N	N	C	N	I	L	F	I	C	P	P	C	1	1	1
1955	C	P	P	C	W	Y	Q	T	L	C	D	S	M	F	S	C	H	I	L	N	S	C	P	P	C	1	1	1
1956	C	P	P	C	W	Y	R	P	L	C	S	F	F	S	V	C	L	N	I	I	H	C	P	P	C	1	1	1
1957	C	P	P	C	W	Y	W	D	S	C	F	M	L	F	R	C	S	G	L	H	I	C	P	P	C	1	1	1
1958	C	P	P	C	W	W	R	L	V	C	T	L	K	H	L	C	D	H	A	Y	Y	C	P	P	C	1	1	1
1959	C	P	P	C	W	W	F	Y	V	C	T	R	T	L	H	C	H	G	F	L	F	C	P	P	C	1	1	1
1960	C	P	P	C	W	F	I	N	F	C	I	I	I	F	Y	C	Y	F	Y	F	F	C	P	P	C	1	1	1
1961	C	P	P	C	W	F	R	W	L	C	H	N	L	F	V	C	V	W	R	S	S	C	P	P	C	1	1	1
1962	C	P	P	C	W	F	E	V	R	C	Y	R	L	F	I	C	I	T	L	I	T	C	P	P	C	1	1	1
1963	C	P	P	C	W	F	F	Y	W	C	K	S	M	F	L	C	V	Y	F	*	K	C	P	P	C	1	1	1
1964	C	P	P	C	L	N	N	F	F	C	I	S	S	N	P	C	I	S	I	I	L	C	P	P	C	1	1	1
1965	C	P	P	C	L	T	Q	R	V	C	G	E	P	S	S	C	V	R	H	N	L	C	P	P	C	1	1	1
1966	C	P	P	C	L	T	L	V	G	C	V	A	V	V	A	C	P	D	E	P	G	C	P	P	C	1	1	1
1967	C	P	P	C	L	T	L	V	G	C	V	A	L	F	A	C	P	D	E	P	G	C	P	P	C	1	1	1
1968	C	P	P	C	L	R	G	P	S	C	M	S	W	T	S	C	E	R	Y	S	S	C	P	P	C	1	1	1
1969	C	P	P	C	L	S	K	K	V	C	D	S	N	N	V	C	Q	N	D	K	V	C	P	P	C	1	1	1
1970	C	P	P	C	L	I	K	S	L	C	F	Y	F	H	L	C	F	I	Y	N	I	C	P	P	C	1	1	1
1971	C	P	P	C	L	I	N	S	R	C	F	Y	F	H	L	C	F	I	Y	N	I	C	P	P	C	1	1	1
1972	C	P	P	C	L	I	N	F	N	C	N	F	N	Y	T	C	F	I	F	N	N	C	P	P	C	1	1	1
1973	C	P	P	C	L	I	D	D	S	C	Y	H	I	S	H	C	I	P	H	I	Y	C	P	P	C	1	1	1
1974	C	P	P	C	L	Q	N	I	M	C	F	N	H	N	F	C	F	N	N	D	N	C	P	P	C	1	1	1
1975	C	P	P	C	L	Q	N	F	I	C	N	I	L	P	Y	C	L	F	F	F	I	C	P	P	C	1	1	1
1976	C	P	P	C	L	H	N	Y	P	C	V	F	L	N	I	C	N	P	L	P	S	C	P	P	C	1	1	1
1977	C	P	P	C	L	H	P	K	A	C	F	P	S	V	D	C	L	N	P	T	T	C	P	P	C	1	1	1
1978	C	P	P	C	L	H	L	T	Y	C	K	S	F	Y	R	C	N	S	S	P	I	C	P	P	C	1	1	1
1979	C	P	P	C	L	H	L	Q	M	C	I	N	F	Y	F	C	L	I	F	*	F	C	P	P	C	1	1	1
1980	C	P	P	C	L	P	V	T	R	C	F	H	N	T	T	C	S	F	Y	P	G	C	P	P	C	1	1	1
1981	C	P	P	C	L	R	P	W	N	C	P	S	L	P	V	C	L	T	A	N	L	C	P	P	C	1	1	1
1982	C	P	P	C	L	R	P	W	N	C	P	S	L	P	F	C	L	T	A	K	L	C	P	P	C	1	1	1
1983	C	P	P	C	L	R	P	W	N	C	P	S	L	P	F	C	L	T	A	S	L	C	P	P	C	1	1	1
1984	C	P	P	C	L	R	P	W	T	C	P	S	L	P	F	C	L	T	A	H	L	C	P	P	C	1	1	1
1985	C	P	P	C	L	L	E	N	N	C	S	L	I	F	Q	C	N	L	I	P	N	C	P	P	C	1	1	1
1986	C	P	P	C	L	L	E	N	N	C	S	F	I	F	Q	C	N	F	I	P	N	C	P	P	C	1	1	1
1987	C	P	P	C	L	L	Y	R	N	C	S	H	T	N	H	C	S	R	P	L	T	C	P	P	C	1	1	1
1988	C	P	P	C	L	L	F	I	S	C	Y	N	T	H	L	C	N	F	N	F	N	C	P	P	C	1	1	1
1989	C	P	P	C	L	D	P	Y	P	C	L	S	V	T	N	C	T	G	V	V	P	C	P	P	C	1	1	1
1990	C	P	P	C	L	D	L	I	F	C	R	T	Y	T	Q	C	F	I	N	R	I	C	P	P	C	1	1	1
1991	C	P	P	C	L	G	M	K	F	C	H	N	A	G	V	C	E	P	F	Y	L	C	P	P	C	1	1	1
1992	C	P	P	C	L	V	H	P	K	C	H	Y	R	N	L	C	Y	N	F	T	N	C	P	P	C	1	1	1
1993	C	P	P	C	L	*	T	L	*	C	F	L	F	F	F	C	F	Y	H	I	F	C	P	P	C	1	1	1
1994	C	P	P	C	L	Y	A	H	N	C	H	L	L	W	Q	C	L	R	Q	S	Q	C	P	P	C	1	1	1
1995	C	P	P	C	L	Y	Y	H	F	C	T	I	L	Y	N	C	N	I	F	F	Y	C	P	P	C	1	1	1
1996	C	P	P	C	L	S	M	*	Y	C	T	N	S	L	S	C	L	I	P	F	Q	C	P	P	C	1	1	1
1997	C	P	P	C	L	L	L	M	L	C	I	L	F	F	W	C	F	S	I	H	Y	C	P	P	C	1	1	1
1998	C	P	P	C	L	F	Q	N	V	C	S	S	L	I	E	C	I	N	R	R	G	C	P	P	C	1	1	1
[truncated: 220 more rows]
