# Supplementary material for: Selection and evolution of disulfide-rich peptides via cellular protein quality control
Source: Chem Sci. 2023 Mar 15;14(13):3668–75. doi: 10.1039/d2sc05343h (PMC10055976; doi:10.1039/d2sc05343h)
Supplement: SC-014-D2SC05343H-s002 [file SC-014-D2SC05343H-s002.xlsx]

## Sheet: Library-1  P4 (with terminator)
Number	Sequences																									Abundance
																										Input	P4	Normalization
1	C	P	P	C	R	N	W	A	R	C	*	R	Q	K	R	C	Y	L	V	N	S	C	P	P	C	1	151	151
2	C	P	P	C	I	*	N	F	V	C	Y	I	I	I	F	C	N	I	L	Y	S	C	P	P	C	6	732	122
3	C	P	P	C	*	F	S	V	H	C	Y	T	Y	S	I	C	S	S	L	N	R	C	P	P	C	1	114	114
4	C	P	P	C	I	F	H	E	*	C	L	Y	Q	L	R	C	N	N	L	N	N	C	P	P	C	1	109	109
5	C	P	P	C	Q	W	*	T	R	C	R	L	L	L	R	C	V	L	S	D	R	C	P	P	C	16	1696	106
6	C	P	P	C	T	*	L	Q	T	C	I	M	N	I	M	C	W	N	K	Q	D	C	P	P	C	2	203	101.5
7	C	P	P	C	*	A	E	R	L	C	S	R	R	W	S	C	M	G	E	A	S	C	P	P	C	18	1804	100.222
8	C	P	P	C	W	N	L	S	N	C	*	N	N	H	F	C	L	I	N	F	Y	C	P	P	C	1	95	95
9	C	P	P	C	R	L	T	L	Y	C	P	Y	M	Q	*	C	L	L	*	F	N	C	P	P	C	1	89	89
10	C	P	P	C	L	Y	S	L	G	C	P	E	K	V	N	C	K	Q	*	A	K	C	P	P	C	1	89	89
11	C	P	P	C	Y	F	R	D	S	C	R	I	I	F	W	C	G	F	V	S	*	C	P	P	C	11	971	88.2727
12	C	P	P	C	Q	A	S	V	A	C	*	S	K	S	T	C	N	I	Q	L	K	C	P	P	C	1	76	76
13	C	P	P	C	Q	N	H	*	S	C	I	S	S	S	H	C	F	P	F	S	F	C	P	P	C	1	71	71
14	C	P	P	C	A	R	L	E	L	C	N	S	M	S	G	C	F	D	*	L	P	C	P	P	C	2	138	69
15	C	P	P	C	F	H	F	*	F	C	H	F	I	F	F	C	F	I	F	Y	N	C	P	P	C	1	69	69
16	C	P	P	C	L	T	M	A	Q	C	T	A	F	H	*	C	R	F	H	L	Q	C	P	P	C	3	205	68.3333
17	C	P	P	C	S	H	Y	N	*	C	Y	I	H	P	Y	C	Y	T	N	H	F	C	P	P	C	12	684	57
18	C	P	P	C	T	R	Q	I	D	C	W	K	S	H	M	C	I	R	L	*	Y	C	P	P	C	2	110	55
19	C	P	P	C	P	R	S	L	F	C	R	R	W	P	R	C	P	L	*	P	M	C	P	P	C	1	55	55
20	C	P	P	C	R	V	A	R	N	C	A	S	L	S	Y	C	*	T	T	E	V	C	P	P	C	2	109	54.5
21	C	P	P	C	R	M	Y	N	L	C	F	N	L	N	*	C	F	N	L	Y	F	C	P	P	C	4	201	50.25
22	C	P	P	C	*	T	V	S	D	C	S	I	L	Y	F	C	N	R	T	H	I	C	P	P	C	1	48	48
23	C	P	P	C	R	L	I	F	G	C	K	A	P	S	T	C	T	*	Y	K	S	C	P	P	C	1	46	46
24	C	P	P	C	*	V	I	L	I	C	F	S	H	T	L	C	Q	I	I	L	F	C	P	P	C	1	44	44
25	C	P	P	C	S	L	L	F	*	C	S	S	K	H	V	C	D	I	W	L	I	C	P	P	C	2	84	42
26	C	P	P	C	L	T	P	M	H	C	*	W	L	R	I	C	*	F	P	S	S	C	P	P	C	1	40	40
27	C	P	P	C	I	N	N	L	N	C	*	N	L	F	I	C	S	F	K	N	S	C	P	P	C	1	39	39
28	C	P	P	C	K	I	F	*	M	C	T	L	Q	N	I	C	F	S	F	S	S	C	P	P	C	5	179	35.8
29	C	P	P	C	Y	R	I	I	Y	C	M	S	L	N	I	C	S	L	R	I	*	C	P	P	C	1	33	33
30	C	P	P	C	I	I	F	*	D	C	M	T	H	K	T	C	N	Y	W	T	N	C	P	P	C	2	59	29.5
31	C	P	P	C	D	K	N	L	*	C	Y	L	I	N	N	C	P	H	F	Y	F	C	P	P	C	1	27	27
32	C	P	P	C	H	N	F	E	F	C	N	A	N	S	A	C	*	I	Q	F	P	C	P	P	C	6	158	26.3333
33	C	P	P	C	F	I	D	D	Q	C	H	S	S	A	*	C	I	N	N	L	M	C	P	P	C	1	24	24
34	C	P	P	C	P	I	*	P	N	C	I	N	Y	Y	L	C	N	L	I	N	R	C	P	P	C	1	23	23
35	C	P	P	C	P	*	R	I	F	C	L	S	P	I	P	C	V	N	S	S	Y	C	P	P	C	1	22	22
36	C	P	P	C	I	Q	S	*	I	C	R	F	R	K	S	C	D	Y	F	S	Y	C	P	P	C	1	21	21
37	C	P	P	C	W	L	D	Q	V	C	T	N	W	*	F	C	W	Y	R	K	V	C	P	P	C	1	18	18
38	C	P	P	C	W	L	P	*	P	C	L	Q	P	L	I	C	L	R	Y	S	M	C	P	P	C	1	18	18
39	C	P	P	C	L	*	T	L	Y	C	F	L	F	F	F	C	F	Y	H	I	F	C	P	P	C	1	17	17
40	C	P	P	C	Y	I	S	Q	N	C	*	S	T	L	R	C	F	N	R	S	N	C	P	P	C	6	98	16.3333
41	C	P	P	C	F	P	F	*	M	C	F	Y	N	R	F	C	E	F	I	*	F	C	P	P	C	1	16	16
42	C	P	P	C	S	G	L	*	G	C	T	S	*	A	H	C	H	S	R	T	W	C	P	P	C	1	15	15
43	C	P	P	C	F	I	I	F	R	C	Y	N	*	F	L	C	K	N	Y	F	Y	C	P	P	C	1	14	14
44	C	P	P	C	*	Q	F	N	I	C	N	H	I	F	Y	C	Y	N	H	Y	Y	C	P	P	C	3	41	13.6667
45	C	P	P	C	*	A	P	K	R	C	L	N	R	M	L	C	F	T	F	I	I	C	P	P	C	1	13	13
46	C	P	P	C	*	F	S	Y	H	C	N	N	N	F	P	C	F	L	S	Y	N	C	P	P	C	1	13	13
47	C	P	P	C	M	R	R	W	D	C	F	F	L	S	N	C	*	Y	I	N	R	C	P	P	C	1	11	11
48	C	P	P	C	P	D	*	K	A	C	T	Y	N	M	L	C	L	I	M	K	K	C	P	P	C	1	11	11
49	C	P	P	C	*	F	N	Y	L	C	F	F	F	Y	F	C	F	F	I	Y	I	C	P	P	C	1	11	11
50	C	P	P	C	V	T	H	N	N	C	F	S	L	S	*	C	*	I	Y	N	N	C	P	P	C	1	10	10
51	C	P	P	C	L	T	S	M	I	C	I	Y	K	I	*	C	I	N	L	I	Y	C	P	P	C	1	9	9
52	C	P	P	C	L	S	R	R	P	C	L	*	N	L	L	C	P	P	N	S	L	C	P	P	C	1	9	9
53	C	P	P	C	V	S	P	R	L	C	F	*	M	M	L	C	L	S	V	I	A	C	P	P	C	1	9	9
54	C	P	P	C	D	F	*	F	R	C	F	F	Q	I	H	C	F	Y	I	L	Y	C	P	P	C	3	24	8
55	C	P	P	C	L	P	L	M	Y	C	W	H	S	F	T	C	Y	I	*	K	Q	C	P	P	C	2	16	8
56	C	P	P	C	T	*	I	S	P	C	T	W	I	P	*	C	G	F	S	L	S	C	P	P	C	1	8	8
57	C	P	P	C	T	I	A	S	Y	C	N	M	H	T	T	C	*	S	Q	S	F	C	P	P	C	1	8	8
58	C	P	P	C	*	R	Y	T	I	C	Y	Y	I	S	D	C	I	Y	I	F	Y	C	P	P	C	1	8	8
59	C	P	P	C	Y	L	N	T	P	C	Y	Q	S	H	R	C	H	F	L	N	*	C	P	P	C	1	8	8
60	C	P	P	C	L	L	F	T	T	C	P	P	F	H	S	C	N	N	H	*	N	C	P	P	C	1	8	8
61	C	P	P	C	K	K	G	N	S	C	N	H	T	Y	I	C	S	F	L	*	N	C	P	P	C	1	7	7
62	C	P	P	C	I	*	L	N	F	C	F	F	K	N	R	C	F	I	N	F	Y	C	P	P	C	1	7	7
63	C	P	P	C	R	I	M	*	W	C	H	S	V	S	F	C	F	F	Y	S	W	C	P	P	C	1	7	7
64	C	P	P	C	L	M	S	T	*	C	*	T	T	F	R	C	T	H	I	T	S	C	P	P	C	1	7	7
65	C	P	P	C	F	F	*	F	I	C	D	I	F	M	I	C	F	Y	V	M	F	C	P	P	C	1	7	7
66	C	P	P	C	Q	D	V	*	F	C	L	G	F	T	T	C	L	V	P	F	N	C	P	P	C	2	12	6
67	C	P	P	C	N	H	D	N	I	C	H	L	N	N	L	C	D	R	*	Q	I	C	P	P	C	1	6	6
68	C	P	P	C	T	N	N	N	Y	C	I	Y	F	L	F	C	M	Q	K	V	*	C	P	P	C	1	6	6
69	C	P	P	C	S	K	A	L	Y	C	Q	G	*	T	K	C	E	H	I	E	R	C	P	P	C	1	6	6
70	C	P	P	C	I	H	M	M	P	C	F	G	W	M	I	C	I	T	*	H	L	C	P	P	C	1	6	6
71	C	P	P	C	R	S	F	F	F	C	N	W	Q	P	F	C	I	I	*	D	W	C	P	P	C	1	6	6
72	C	P	P	C	R	R	P	Q	*	C	L	H	P	Q	F	C	H	F	M	F	D	C	P	P	C	1	6	6
73	C	P	P	C	R	F	G	T	L	C	*	T	*	Q	M	C	N	P	G	F	K	C	P	P	C	1	6	6
74	C	P	P	C	L	G	G	S	G	C	*	D	M	P	P	C	P	F	S	Q	S	C	P	P	C	1	6	6
75	C	P	P	C	V	I	I	Q	N	C	I	I	Y	R	*	C	I	M	L	P	I	C	P	P	C	1	6	6
76	C	P	P	C	*	H	M	I	L	C	L	T	L	L	N	C	F	N	T	Y	D	C	P	P	C	1	6	6
77	C	P	P	C	*	Y	I	R	H	C	Y	N	T	I	L	C	I	Y	F	F	F	C	P	P	C	1	6	6
78	C	P	P	C	*	L	I	L	L	C	N	P	T	H	T	C	Y	N	L	I	S	C	P	P	C	1	6	6
79	C	P	P	C	Y	N	L	W	F	C	F	H	Y	Y	H	C	M	N	*	S	T	C	P	P	C	1	6	6
80	C	P	P	C	Y	Y	S	W	I	C	W	A	*	I	R	C	F	N	G	K	L	C	P	P	C	1	6	6
81	C	P	P	C	N	T	S	H	F	C	N	L	F	*	N	C	Y	I	F	L	H	C	P	P	C	1	5	5
82	C	P	P	C	S	H	Y	N	*	C	Y	I	H	P	Y	C	Y	T	T	H	F	C	P	P	C	1	5	5
83	C	P	P	C	S	D	Y	*	Y	C	N	S	Y	I	N	C	L	F	S	S	N	C	P	P	C	1	5	5
84	C	P	P	C	I	R	R	Y	Y	C	H	T	P	R	F	C	M	R	*	R	Y	C	P	P	C	1	5	5
85	C	P	P	C	R	L	Y	T	N	C	I	S	*	L	Y	C	F	F	I	M	N	C	P	P	C	1	5	5
86	C	P	P	C	L	H	L	N	L	C	S	N	T	N	L	C	Y	Y	Y	N	*	C	P	P	C	1	5	5
87	C	P	P	C	*	F	I	S	W	C	F	N	L	I	F	C	E	R	L	Y	S	C	P	P	C	1	5	5
88	C	P	P	C	L	H	L	Q	I	C	I	N	F	Y	F	C	L	I	F	*	F	C	P	P	C	2	9	4.5
89	C	P	P	C	*	G	S	L	S	C	D	R	W	L	L	C	I	S	A	S	L	C	P	P	C	3	12	4
90	C	P	P	C	I	S	R	K	Y	C	T	V	*	R	H	C	F	R	F	F	L	C	P	P	C	2	8	4
91	C	P	P	C	R	S	*	M	P	C	H	M	*	N	F	C	N	S	R	Q	N	C	P	P	C	1	4	4
92	C	P	P	C	R	S	A	W	*	C	N	S	R	P	K	C	T	I	W	W	L	C	P	P	C	1	4	4
93	C	P	P	C	I	K	K	V	L	C	T	F	I	*	N	C	Y	M	F	F	K	C	P	P	C	1	4	4
94	C	P	P	C	R	V	A	R	T	C	A	S	L	S	Y	C	*	T	T	E	V	C	P	P	C	1	4	4
95	C	P	P	C	R	W	N	V	*	C	L	I	N	K	Q	C	F	F	Y	Y	N	C	P	P	C	1	4	4
96	C	P	P	C	G	D	W	Q	N	C	W	V	P	S	V	C	S	I	F	*	*	C	P	P	C	1	4	4
97	C	P	P	C	G	F	E	M	L	C	*	I	F	Y	S	C	F	T	K	P	N	C	P	P	C	1	4	4
98	C	P	P	C	V	N	T	Q	N	C	*	L	F	I	P	C	I	Y	I	K	R	C	P	P	C	1	4	4
99	C	P	P	C	*	V	N	L	Y	C	F	Y	P	N	S	C	D	F	F	I	M	C	P	P	C	1	4	4
100	C	P	P	C	Y	P	N	F	Y	C	L	N	S	H	S	C	H	W	I	*	M	C	P	P	C	1	4	4
101	C	P	P	C	Y	F	R	D	R	C	R	I	I	F	W	C	G	F	V	S	*	C	P	P	C	1	4	4
102	C	P	P	C	S	F	F	*	L	C	F	I	N	H	N	C	F	I	F	I	F	C	P	P	C	1	4	4
103	C	P	P	C	W	Y	*	A	R	C	I	V	A	R	F	C	H	K	D	*	R	C	P	P	C	1	4	4
104	C	P	P	C	F	N	S	*	M	C	N	D	N	D	*	C	F	F	T	I	F	C	P	P	C	1	4	4
105	C	P	P	C	L	G	G	S	G	C	*	D	M	P	P	C	P	F	S	Q	S	C	P	P	C	1	3	3
106	C	P	P	C	N	N	N	*	I	C	L	Y	W	I	F	C	V	T	F	Y	T	C	P	P	C	1	3	3
107	C	P	P	C	N	L	*	I	Y	C	I	I	I	H	L	C	F	I	K	F	F	C	P	P	C	1	3	3
108	C	P	P	C	N	A	T	G	S	C	S	T	*	M	S	C	L	Y	D	L	Y	C	P	P	C	1	3	3
109	C	P	P	C	T	T	M	*	L	C	L	G	Y	R	F	C	S	F	V	K	I	C	P	P	C	1	3	3
110	C	P	P	C	R	N	W	V	R	C	*	R	Q	K	R	C	Y	L	V	N	S	C	P	P	C	1	3	3
111	C	P	P	C	R	M	Y	N	L	C	F	N	L	N	*	C	F	K	L	Y	F	C	P	P	C	1	3	3
112	C	P	P	C	R	H	N	*	F	C	N	Y	N	I	H	C	I	L	M	N	H	C	P	P	C	1	3	3
113	C	P	P	C	R	P	W	S	L	C	Y	I	P	T	R	C	*	S	Q	N	H	C	P	P	C	1	3	3
114	C	P	P	C	M	Y	M	K	G	C	F	N	F	N	K	C	I	F	H	Y	*	C	P	P	C	1	3	3
115	C	P	P	C	I	E	G	R	V	C	Q	L	T	*	D	C	S	R	L	S	L	C	P	P	C	1	3	3
116	C	P	P	C	I	*	N	F	G	C	Y	I	I	I	F	C	N	I	L	Y	S	C	P	P	C	1	3	3
117	C	P	P	C	I	Y	Y	N	T	C	A	I	L	S	R	C	F	I	S	*	Y	C	P	P	C	1	3	3
118	C	P	P	C	Q	G	H	H	Y	C	Y	L	H	S	T	C	*	Y	S	Y	Q	C	P	P	C	1	3	3
119	C	P	P	C	H	N	*	Y	*	C	R	V	L	L	S	C	I	Y	W	M	T	C	P	P	C	1	3	3
120	C	P	P	C	P	N	D	N	L	C	F	Y	I	*	I	C	N	I	L	F	Y	C	P	P	C	1	3	3
121	C	P	P	C	R	S	G	A	S	C	W	L	I	*	L	C	G	S	S	D	L	C	P	P	C	1	3	3
122	C	P	P	C	L	L	*	E	K	C	F	Y	T	F	V	C	Y	T	I	N	S	C	P	P	C	1	3	3
123	C	P	P	C	L	I	L	*	I	C	E	M	I	S	H	C	V	S	F	I	S	C	P	P	C	1	3	3
124	C	P	P	C	D	H	P	Q	Q	C	G	S	P	L	P	C	F	*	H	S	I	C	P	P	C	1	3	3
125	C	P	P	C	D	P	F	F	L	C	Q	F	*	T	L	C	S	H	I	I	I	C	P	P	C	1	3	3
126	C	P	P	C	V	F	*	I	T	C	F	F	I	N	K	C	F	T	N	L	I	C	P	P	C	1	3	3
127	C	P	P	C	*	Y	M	L	Q	C	L	L	H	Y	E	C	M	Y	K	R	S	C	P	P	C	1	3	3
128	C	P	P	C	*	F	I	S	G	C	F	N	L	I	F	C	E	R	L	Y	S	C	P	P	C	1	3	3
129	C	P	P	C	Y	K	Y	S	N	C	S	G	L	T	A	C	Y	D	*	Y	Y	C	P	P	C	1	3	3
130	C	P	P	C	Y	R	I	I	Y	C	M	S	L	N	I	C	S	L	G	I	*	C	P	P	C	1	3	3
131	C	P	P	C	Y	V	R	D	S	C	R	I	I	F	W	C	G	F	V	S	*	C	P	P	C	1	3	3
132	C	P	P	C	Y	F	R	D	S	C	R	L	I	F	W	C	G	F	V	S	*	C	P	P	C	1	3	3
133	C	P	P	C	S	Q	T	K	Q	C	V	F	T	K	Y	C	H	H	*	I	S	C	P	P	C	1	3	3
134	C	P	P	C	W	K	L	K	S	C	N	Y	*	N	H	C	I	W	H	H	P	C	P	P	C	1	3	3
135	C	P	P	C	W	S	W	Y	F	C	F	Y	F	*	N	C	N	H	L	N	N	C	P	P	C	1	3	3
136	C	P	P	C	F	N	N	H	L	C	L	N	L	Q	V	C	*	N	H	S	R	C	P	P	C	1	3	3
137	C	P	P	C	F	L	N	*	D	C	L	S	I	F	N	C	I	W	V	Y	F	C	P	P	C	1	3	3
138	C	P	P	C	F	*	N	L	F	C	F	N	Y	S	I	C	I	H	*	F	L	C	P	P	C	1	3	3
139	C	P	P	C	Y	F	R	D	S	C	R	I	I	F	W	C	G	F	V	S	*	C	P	P	C	1	3	3
140	C	P	P	C	S	I	H	T	*	C	F	N	L	Y	N	C	Y	F	I	F	I	C	P	P	C	3	6	2
141	C	P	P	C	D	F	S	N	A	C	H	R	*	I	S	C	I	F	W	F	L	C	P	P	C	2	4	2
142	C	P	P	C	K	T	K	A	R	C	S	R	L	V	R	C	H	*	N	P	D	C	P	P	C	1	2	2
143	C	P	P	C	K	P	I	V	N	C	K	S	H	*	T	C	F	Y	L	T	N	C	P	P	C	1	2	2
144	C	P	P	C	N	L	Y	R	*	C	F	S	F	T	I	C	Y	N	Y	H	T	C	P	P	C	1	2	2
145	C	P	P	C	T	N	Y	*	H	C	S	N	S	R	L	C	T	T	I	Q	K	C	P	P	C	1	2	2
146	C	P	P	C	T	L	V	S	Y	C	F	F	R	I	P	C	I	Y	F	*	H	C	P	P	C	1	2	2
147	C	P	P	C	T	D	R	M	*	C	A	W	K	S	T	C	K	T	Q	T	S	C	P	P	C	1	2	2
148	C	P	P	C	R	N	W	A	R	C	*	R	Q	K	R	C	Y	L	V	N	S	C	P	P	C	1	2	2
149	C	P	P	C	R	R	R	P	G	C	L	I	I	L	S	C	*	R	Q	K	P	C	P	P	C	1	2	2
150	C	P	P	C	S	K	H	L	T	C	F	R	F	S	*	C	I	S	T	D	H	C	P	P	C	1	2	2
151	C	P	P	C	S	S	E	S	D	C	S	*	M	Q	V	C	L	L	R	H	N	C	P	P	C	1	2	2
152	C	P	P	C	S	R	G	M	N	C	G	S	L	R	L	C	H	F	R	*	S	C	P	P	C	1	2	2
153	C	P	P	C	S	S	*	I	I	C	Y	D	S	I	N	C	F	H	Y	Y	Y	C	P	P	C	1	2	2
154	C	P	P	C	I	N	I	*	S	C	N	D	*	Y	V	C	D	L	N	I	V	C	P	P	C	1	2	2
155	C	P	P	C	I	I	*	Q	I	C	R	H	S	V	D	C	Y	F	I	L	R	C	P	P	C	1	2	2
156	C	P	P	C	I	H	S	P	V	C	H	T	M	T	*	C	T	Y	L	V	S	C	P	P	C	1	2	2
157	C	P	P	C	I	L	H	*	F	C	T	N	I	Y	Y	C	S	I	M	R	S	C	P	P	C	1	2	2
158	C	P	P	C	I	*	T	F	V	C	Y	I	I	I	F	C	N	I	L	Y	S	C	P	P	C	1	2	2
159	C	P	P	C	I	S	I	*	F	C	I	Y	F	S	F	C	L	Y	Y	I	F	C	P	P	C	1	2	2
160	C	P	P	C	I	F	N	*	I	C	N	N	N	*	N	C	F	Y	N	Y	Y	C	P	P	C	1	2	2
161	C	P	P	C	I	F	Y	*	I	C	I	Y	F	N	I	C	Y	I	H	F	H	C	P	P	C	1	2	2
162	C	P	P	C	Q	R	R	I	*	C	V	T	H	N	L	C	S	N	F	W	F	C	P	P	C	1	2	2
163	C	P	P	C	Q	D	R	F	H	C	V	F	P	*	G	C	F	A	P	S	W	C	P	P	C	1	2	2
164	C	P	P	C	H	S	L	F	L	C	H	*	I	A	V	C	L	K	F	N	N	C	P	P	C	1	2	2
165	C	P	P	C	H	D	N	F	Y	C	I	N	S	F	I	C	N	I	*	F	N	C	P	P	C	1	2	2
166	C	P	P	C	H	V	E	R	A	C	S	Y	I	L	D	C	*	W	R	H	S	C	P	P	C	1	2	2
167	C	P	P	C	H	F	N	F	N	C	I	I	F	N	*	C	*	N	I	F	F	C	P	P	C	1	2	2
168	C	P	P	C	P	P	H	*	I	C	N	S	R	G	S	C	F	F	L	F	Y	C	P	P	C	1	2	2
169	C	P	P	C	R	V	I	F	G	C	K	A	P	S	T	C	T	*	Y	K	S	C	P	P	C	1	2	2
170	C	P	P	C	R	*	F	I	G	C	H	V	R	F	R	C	I	L	I	D	N	C	P	P	C	1	2	2
171	C	P	P	C	R	Q	Y	Q	V	C	*	T	S	Y	S	C	T	Y	R	N	T	C	P	P	C	1	2	2
172	C	P	P	C	R	H	S	*	I	C	H	L	P	S	L	C	F	I	I	Y	Q	C	P	P	C	1	2	2
173	C	P	P	C	R	L	T	R	Y	C	P	Y	M	Q	*	C	L	L	*	F	N	C	P	P	C	1	2	2
174	C	P	P	C	R	G	A	P	R	C	L	V	M	K	L	C	T	I	*	P	V	C	P	P	C	1	2	2
175	C	P	P	C	R	G	L	M	F	C	I	T	N	*	H	C	*	Y	F	Y	F	C	P	P	C	1	2	2
176	C	P	P	C	R	Y	D	T	N	C	H	F	*	Y	F	C	I	H	L	Y	N	C	P	P	C	1	2	2
177	C	P	P	C	R	W	G	R	W	C	P	Y	*	E	V	C	T	W	Q	R	G	C	P	P	C	1	2	2
178	C	P	P	C	L	T	P	M	Q	C	*	W	L	R	I	C	*	F	P	S	S	C	P	P	C	1	2	2
179	C	P	P	C	L	T	P	L	H	C	*	W	L	R	I	C	*	F	P	S	S	C	P	P	C	1	2	2
180	C	P	P	C	L	T	R	F	L	C	R	S	N	S	A	C	N	S	Y	*	Y	C	P	P	C	1	2	2
181	C	P	P	C	L	L	S	P	V	C	K	S	I	S	I	C	L	S	M	N	*	C	P	P	C	1	2	2
182	C	P	P	C	L	*	G	G	I	C	L	S	G	F	L	C	S	N	F	E	S	C	P	P	C	1	2	2
183	C	P	P	C	L	Y	F	A	F	C	T	T	H	F	Y	C	*	F	E	N	F	C	P	P	C	1	2	2
184	C	P	P	C	E	P	P	Y	L	C	T	Y	R	F	S	C	R	F	*	Y	I	C	P	P	C	1	2	2
185	C	P	P	C	E	E	N	I	S	C	P	F	Q	F	A	C	W	R	T	*	A	C	P	P	C	1	2	2
186	C	P	P	C	A	D	L	G	L	C	T	Y	*	S	Q	C	I	F	V	N	*	C	P	P	C	1	2	2
187	C	P	P	C	A	R	G	P	H	C	W	Q	H	P	W	C	M	L	S	*	K	C	P	P	C	1	2	2
188	C	P	P	C	G	N	L	R	Y	C	L	N	*	I	L	C	L	K	*	L	F	C	P	P	C	1	2	2
189	C	P	P	C	V	*	K	T	L	C	L	Q	S	N	S	C	F	S	I	G	I	C	P	P	C	1	2	2
190	C	P	P	C	V	F	V	Y	S	C	H	R	P	L	F	C	L	*	M	R	H	C	P	P	C	1	2	2
191	C	P	P	C	V	I	A	P	N	C	H	Y	I	S	L	C	I	T	L	H	*	C	P	P	C	1	2	2
192	C	P	P	C	*	N	D	T	W	C	I	P	L	H	H	C	F	F	H	*	M	C	P	P	C	1	2	2
193	C	P	P	C	*	I	T	V	F	C	L	N	F	Y	F	C	I	F	F	I	Y	C	P	P	C	1	2	2
194	C	P	P	C	*	I	F	Y	F	C	Y	N	T	N	S	C	Y	Y	Y	N	H	C	P	P	C	1	2	2
195	C	P	P	C	*	R	T	L	R	C	P	I	L	I	H	C	T	R	S	L	L	C	P	P	C	1	2	2
196	C	P	P	C	*	A	R	M	Y	C	W	N	I	F	R	C	I	S	S	K	I	C	P	P	C	1	2	2
197	C	P	P	C	*	F	S	V	H	C	Y	T	Y	S	I	C	S	S	L	N	R	C	P	P	C	1	2	2
198	C	P	P	C	*	F	S	V	H	C	Y	T	Y	S	I	C	S	S	F	N	R	C	P	P	C	1	2	2
199	C	P	P	C	Y	R	I	A	S	C	H	D	*	F	N	C	F	S	V	L	L	C	P	P	C	1	2	2
200	C	P	P	C	Y	F	R	D	R	C	R	I	I	F	W	C	G	F	V	S	*	C	P	P	C	1	2	2
201	C	P	P	C	Y	F	H	T	*	C	S	P	S	N	N	C	Y	Y	S	N	L	C	P	P	C	1	2	2
202	C	P	P	C	S	T	M	L	Y	C	Y	N	R	L	N	C	N	H	*	Y	L	C	P	P	C	1	2	2
203	C	P	P	C	S	D	F	*	I	C	H	F	P	I	T	C	S	N	H	L	Y	C	P	P	C	1	2	2
204	C	P	P	C	S	*	N	S	Q	C	L	T	K	D	I	C	P	Y	Y	Q	S	C	P	P	C	1	2	2
205	C	P	P	C	W	W	K	S	W	C	F	S	*	W	R	C	S	D	P	H	V	C	P	P	C	1	2	2
206	C	P	P	C	F	*	I	S	Y	C	Y	L	*	H	F	C	I	N	I	F	I	C	P	P	C	1	2	2
207	C	P	P	C	Q	A	S	V	A	C	*	S	K	S	T	C	N	I	Q	L	K	C	P	P	C	1	2	2
208	C	P	P	C	H	N	F	E	F	C	N	A	N	S	A	C	*	I	Q	F	P	C	P	P	C	1	2	2
209	C	P	P	C	Q	F	A	N	F	C	F	*	L	S	M	C	F	Y	T	V	L	C	P	P	C	3	5	1.66667
210	C	P	P	C	T	R	Q	I	D	C	W	K	S	H	M	C	I	R	L	*	Y	C	P	P	C	2	3	1.5
211	C	P	P	C	S	R	S	S	E	C	F	W	T	F	*	C	N	H	K	F	F	C	P	P	C	2	3	1.5
212	C	P	P	C	L	E	W	S	I	C	M	Y	F	H	Q	C	L	P	*	Y	V	C	P	P	C	2	3	1.5
213	C	P	P	C	R	Y	S	F	L	C	*	H	L	V	V	C	Y	F	A	T	G	C	P	P	C	3	4	1.33333
214	C	P	P	C	E	N	*	N	Y	C	F	P	I	Y	F	C	F	F	L	K	H	C	P	P	C	3	4	1.33333
215	C	P	P	C	R	L	*	R	D	C	I	N	H	N	*	C	P	T	Q	G	P	C	P	P	C	6	6	1
216	C	P	P	C	I	I	F	*	D	C	M	T	H	K	T	C	N	Y	W	T	N	C	P	P	C	2	2	1
217	C	P	P	C	V	Q	T	*	Y	C	I	I	S	I	N	C	S	S	A	N	F	C	P	P	C	2	2	1
218	C	P	P	C	L	*	T	L	Y	C	F	L	F	F	F	C	F	Y	H	I	F	C	P	P	C	1	1	1
219	C	P	P	C	I	H	S	P	V	C	H	T	M	T	*	C	T	Y	L	V	S	C	P	P	C	1	1	1
220	C	P	P	C	*	Y	R	Y	K	C	S	F	F	S	H	C	Y	I	S	Y	I	C	P	P	C	1	1	1
221	C	P	P	C	Y	I	S	Q	N	C	*	S	T	L	R	C	F	N	R	S	T	C	P	P	C	1	1	1
222	C	P	P	C	K	I	F	*	M	C	T	L	Q	K	I	C	F	S	F	S	S	C	P	P	C	1	1	1
223	C	P	P	C	K	I	F	*	M	C	T	L	Q	N	S	C	F	S	F	S	S	C	P	P	C	1	1	1
224	C	P	P	C	K	A	T	F	S	C	I	*	N	M	F	C	N	I	I	Q	M	C	P	P	C	1	1	1
225	C	P	P	C	K	*	L	W	I	C	P	L	Y	Y	L	C	*	I	A	H	*	C	P	P	C	1	1	1
226	C	P	P	C	K	Y	R	L	K	C	T	L	P	P	*	C	*	I	P	L	F	C	P	P	C	1	1	1
227	C	P	P	C	N	N	S	T	H	C	L	N	R	I	*	C	*	N	F	M	T	C	P	P	C	1	1	1
228	C	P	P	C	N	T	Y	F	S	C	F	R	F	L	K	C	T	I	Y	L	*	C	P	P	C	1	1	1
229	C	P	P	C	N	L	F	*	L	C	F	Y	H	N	I	C	I	S	T	F	I	C	P	P	C	1	1	1
230	C	P	P	C	N	G	A	V	W	C	V	*	T	L	T	C	D	D	G	V	N	C	P	P	C	1	1	1
231	C	P	P	C	N	V	*	*	I	C	N	P	L	S	V	C	I	W	L	P	V	C	P	P	C	1	1	1
232	C	P	P	C	N	L	I	S	*	C	L	S	N	H	P	C	Y	F	I	H	M	C	P	P	C	1	1	1
233	C	P	P	C	N	F	N	N	P	C	D	N	N	F	H	C	N	N	*	H	Y	C	P	P	C	1	1	1
234	C	P	P	C	N	F	P	L	S	C	R	P	R	L	K	C	*	S	L	T	S	C	P	P	C	1	1	1
235	C	P	P	C	T	N	N	*	L	C	N	L	Y	D	S	C	I	F	D	Y	L	C	P	P	C	1	1	1
236	C	P	P	C	T	S	Y	I	K	C	I	K	N	H	M	C	*	D	N	F	I	C	P	P	C	1	1	1
237	C	P	P	C	T	M	Y	N	L	C	F	N	L	N	*	C	F	N	L	Y	F	C	P	P	C	1	1	1
238	C	P	P	C	T	H	Q	D	L	C	D	H	N	M	K	C	T	Y	P	*	P	C	P	P	C	1	1	1
239	C	P	P	C	T	Y	W	H	F	C	Y	P	F	N	V	C	L	S	L	Y	*	C	P	P	C	1	1	1
240	C	P	P	C	T	S	L	L	D	C	Y	I	S	S	L	C	N	N	Y	*	H	C	P	P	C	1	1	1
241	C	P	P	C	T	K	M	N	V	C	R	S	I	W	N	C	Y	I	Y	T	*	C	P	P	C	1	1	1
242	C	P	P	C	T	N	S	N	*	C	Y	L	N	I	N	C	I	T	F	Y	I	C	P	P	C	1	1	1
243	C	P	P	C	T	N	S	K	*	C	L	T	F	L	R	C	L	H	F	S	N	C	P	P	C	1	1	1
244	C	P	P	C	T	I	A	S	Y	C	T	M	H	T	T	C	*	S	Q	S	F	C	P	P	C	1	1	1
245	C	P	P	C	T	I	*	I	I	C	N	R	L	K	D	C	I	G	F	Y	L	C	P	P	C	1	1	1
246	C	P	P	C	T	I	F	S	A	C	S	I	F	L	R	C	*	H	H	N	H	C	P	P	C	1	1	1
247	C	P	P	C	T	P	R	L	L	C	F	S	Y	T	V	C	*	W	H	I	L	C	P	P	C	1	1	1
248	C	P	P	C	T	R	Q	S	E	C	W	K	S	H	M	C	I	R	L	*	Y	C	P	P	C	1	1	1
249	C	P	P	C	T	R	Q	I	D	C	W	K	S	H	M	C	I	R	R	*	Y	C	P	P	C	1	1	1
250	C	P	P	C	T	R	Q	I	D	C	W	K	S	H	L	C	I	R	L	*	Y	C	P	P	C	1	1	1
251	C	P	P	C	T	R	H	S	A	C	I	H	S	Q	*	C	H	F	R	H	V	C	P	P	C	1	1	1
252	C	P	P	C	T	D	F	*	Q	C	P	T	I	F	H	C	L	N	D	F	Y	C	P	P	C	1	1	1
253	C	P	P	C	T	*	L	Q	T	C	I	M	N	I	M	C	W	T	K	Q	D	C	P	P	C	1	1	1
254	C	P	P	C	T	*	L	Q	T	C	I	M	N	I	L	C	W	N	K	Q	D	C	P	P	C	1	1	1
255	C	P	P	C	T	Y	R	R	*	C	L	G	L	Y	N	C	F	N	E	Y	I	C	P	P	C	1	1	1
256	C	P	P	C	R	N	W	A	R	C	*	R	Q	K	R	C	Y	L	V	N	S	C	P	P	C	1	1	1
257	C	P	P	C	R	N	W	V	R	C	*	R	Q	K	R	C	Y	L	V	N	S	C	P	P	C	1	1	1
258	C	P	P	C	R	H	W	A	R	C	*	R	Q	K	R	C	Y	L	V	N	S	C	P	P	C	1	1	1
259	C	P	P	C	R	T	K	*	N	C	F	Q	I	H	S	C	K	N	F	N	Y	C	P	P	C	1	1	1
260	C	P	P	C	R	R	N	Y	P	C	Q	P	*	G	G	C	*	V	W	*	N	C	P	P	C	1	1	1
261	C	P	P	C	R	S	L	V	F	C	N	R	*	S	Y	C	S	F	S	E	I	C	P	P	C	1	1	1
262	C	P	P	C	R	M	Y	N	S	C	F	N	L	N	*	C	F	N	L	Y	F	C	P	P	C	1	1	1
263	C	P	P	C	R	M	Y	N	L	C	F	N	L	N	*	C	F	N	L	Y	V	C	P	P	C	1	1	1
264	C	P	P	C	R	V	*	R	D	C	I	N	H	N	*	C	P	T	Q	G	P	C	P	P	C	1	1	1
265	C	P	P	C	R	V	Y	N	L	C	F	N	L	N	*	C	F	N	L	Y	F	C	P	P	C	1	1	1
266	C	P	P	C	R	W	H	N	A	C	I	I	Q	R	D	C	P	Y	F	*	N	C	P	P	C	1	1	1
267	C	P	P	C	S	N	Y	*	Y	C	N	F	S	I	D	C	F	Y	I	Y	L	C	P	P	C	1	1	1
268	C	P	P	C	S	S	T	L	K	C	F	S	L	L	T	C	L	K	*	N	K	C	P	P	C	1	1	1
269	C	P	P	C	S	I	T	V	F	C	V	*	Q	H	K	C	L	H	D	Y	N	C	P	P	C	1	1	1
270	C	P	P	C	S	Q	Y	N	*	C	Y	I	H	P	Y	C	Y	T	N	H	F	C	P	P	C	1	1	1
271	C	P	P	C	S	H	Y	N	*	C	Y	I	Q	P	Y	C	Y	T	N	H	F	C	P	P	C	1	1	1
272	C	P	P	C	S	H	Y	N	*	C	Y	I	H	P	Y	C	Y	T	N	H	N	C	P	P	C	1	1	1
273	C	P	P	C	S	H	Y	N	*	C	Y	I	Y	P	Y	C	Y	T	N	H	F	C	P	P	C	1	1	1
274	C	P	P	C	S	H	Y	N	*	C	S	I	H	P	Y	C	Y	T	N	H	F	C	P	P	C	1	1	1
275	C	P	P	C	S	P	Y	N	*	C	Y	I	H	P	Y	C	Y	T	N	Q	F	C	P	P	C	1	1	1
276	C	P	P	C	S	P	Y	N	*	C	Y	I	H	P	Y	C	Y	T	N	H	F	C	P	P	C	1	1	1
277	C	P	P	C	S	R	R	L	G	C	K	P	*	F	W	C	A	G	Y	A	P	C	P	P	C	1	1	1
278	C	P	P	C	S	L	Y	V	L	C	F	S	*	K	I	C	F	T	T	Q	I	C	P	P	C	1	1	1
279	C	P	P	C	S	D	H	*	*	C	T	S	F	N	R	C	S	I	I	L	K	C	P	P	C	1	1	1
280	C	P	P	C	S	D	V	Q	I	C	Y	N	L	L	S	C	F	H	D	*	N	C	P	P	C	1	1	1
281	C	P	P	C	S	D	Y	*	Y	C	N	S	Y	I	K	C	L	F	S	S	N	C	P	P	C	1	1	1
282	C	P	P	C	S	G	T	V	*	C	P	R	L	D	A	C	F	Y	G	Q	T	C	P	P	C	1	1	1
283	C	P	P	C	S	V	Q	L	G	C	M	S	*	R	R	C	D	T	R	E	D	C	P	P	C	1	1	1
284	C	P	P	C	S	*	N	F	V	C	Y	I	I	I	F	C	N	I	L	Y	S	C	P	P	C	1	1	1
285	C	P	P	C	S	Y	G	D	*	C	L	S	R	K	W	C	N	L	F	S	S	C	P	P	C	1	1	1
286	C	P	P	C	S	Y	V	L	*	C	N	Y	Q	F	D	C	H	P	S	L	T	C	P	P	C	1	1	1
287	C	P	P	C	S	W	I	S	V	C	G	T	L	P	M	C	Y	F	A	F	*	C	P	P	C	1	1	1
288	C	P	P	C	M	Q	Q	S	S	C	D	V	*	*	*	C	K	Y	S	T	D	C	P	P	C	1	1	1
289	C	P	P	C	M	S	H	*	R	C	I	R	Q	S	F	C	V	M	I	I	L	C	P	P	C	1	1	1
290	C	P	P	C	I	K	L	K	*	C	S	R	L	S	R	C	N	N	H	Y	F	C	P	P	C	1	1	1
291	C	P	P	C	I	N	N	S	N	C	*	N	L	F	I	C	S	F	K	N	S	C	P	P	C	1	1	1
292	C	P	P	C	I	R	R	Y	Y	C	H	T	P	R	F	C	M	R	*	R	S	C	P	P	C	1	1	1
293	C	P	P	C	I	M	A	L	L	C	A	P	Y	W	A	C	K	I	*	R	T	C	P	P	C	1	1	1
294	C	P	P	C	I	I	N	*	F	C	N	N	F	I	F	C	F	F	N	Y	H	C	P	P	C	1	1	1
295	C	P	P	C	I	I	F	*	D	C	M	T	H	K	T	C	K	Y	W	T	N	C	P	P	C	1	1	1
296	C	P	P	C	I	R	H	R	G	C	D	R	Q	Y	P	C	*	I	H	D	D	C	P	P	C	1	1	1
297	C	P	P	C	I	L	Y	I	*	C	A	F	P	L	I	C	N	I	F	M	Y	C	P	P	C	1	1	1
298	C	P	P	C	I	*	N	F	V	C	Y	I	I	I	F	C	T	I	L	Y	S	C	P	P	C	1	1	1
299	C	P	P	C	I	*	N	F	V	C	Y	I	L	I	F	C	N	I	L	Y	S	C	P	P	C	1	1	1
300	C	P	P	C	I	*	N	F	V	C	Y	L	I	I	F	C	N	I	L	Y	S	C	P	P	C	1	1	1
301	C	P	P	C	I	*	N	F	V	C	S	I	I	I	F	C	N	I	L	Y	S	C	P	P	C	1	1	1
302	C	P	P	C	I	S	T	A	V	C	K	R	Q	L	R	C	I	H	R	*	A	C	P	P	C	1	1	1
303	C	P	P	C	I	S	F	T	*	C	N	T	N	N	F	C	F	N	I	H	N	C	P	P	C	1	1	1
304	C	P	P	C	I	F	I	F	Y	C	Y	Y	F	H	*	C	N	V	F	Y	F	C	P	P	C	1	1	1
305	C	P	P	C	I	F	H	E	*	C	L	Y	Q	L	R	C	N	N	L	N	N	C	P	P	C	1	1	1
306	C	P	P	C	I	F	H	E	*	C	V	Y	Q	L	R	C	N	N	L	N	N	C	P	P	C	1	1	1
307	C	P	P	C	I	F	A	*	N	C	R	P	Y	P	I	C	N	T	Y	L	P	C	P	P	C	1	1	1
308	C	P	P	C	Q	N	H	*	S	C	I	S	S	S	H	C	F	P	F	S	F	C	P	P	C	1	1	1
309	C	P	P	C	Q	N	H	*	S	C	V	S	S	S	H	C	F	P	F	S	F	C	P	P	C	1	1	1
310	C	P	P	C	Q	H	Y	I	N	C	I	N	M	*	S	C	I	F	Y	L	Y	C	P	P	C	1	1	1
311	C	P	P	C	Q	S	V	G	T	C	L	L	P	T	Y	C	*	T	L	L	L	C	P	P	C	1	1	1
312	C	P	P	C	Q	F	Y	S	V	C	*	S	K	T	*	C	L	K	S	H	F	C	P	P	C	1	1	1
313	C	P	P	C	Q	F	S	L	*	C	L	I	F	Y	N	C	F	H	F	Y	M	C	P	P	C	1	1	1
314	C	P	P	C	H	K	F	E	F	C	N	A	N	S	A	C	*	I	Q	F	P	C	P	P	C	1	1	1
315	C	P	P	C	H	N	F	*	F	C	I	S	S	F	I	C	I	I	N	F	N	C	P	P	C	1	1	1
316	C	P	P	C	H	I	L	N	F	C	I	S	S	N	R	C	Y	N	*	S	S	C	P	P	C	1	1	1
317	C	P	P	C	H	*	K	I	G	C	T	Y	N	R	N	C	P	D	T	Q	E	C	P	P	C	1	1	1
318	C	P	P	C	H	S	D	*	R	C	R	H	T	R	S	C	N	K	H	T	K	C	P	P	C	1	1	1
319	C	P	P	C	H	S	D	*	R	C	R	H	T	R	S	C	N	K	H	T	E	C	P	P	C	1	1	1
320	C	P	P	C	H	F	I	R	H	C	F	S	I	N	F	C	*	F	M	L	L	C	P	P	C	1	1	1
321	C	P	P	C	H	F	P	Y	N	C	N	Y	H	I	F	C	*	Y	N	Y	D	C	P	P	C	1	1	1
322	C	P	P	C	H	F	D	F	K	C	F	H	F	*	L	C	I	N	L	F	S	C	P	P	C	1	1	1
323	C	P	P	C	P	H	F	P	*	C	H	R	S	Y	N	C	N	N	I	N	I	C	P	P	C	1	1	1
324	C	P	P	C	P	R	S	L	F	C	R	R	W	P	R	C	P	L	*	P	M	C	P	P	C	1	1	1
325	C	P	P	C	P	G	N	*	L	C	E	R	T	I	R	C	T	S	I	K	P	C	P	P	C	1	1	1
326	C	P	P	C	P	*	R	I	F	C	L	S	P	I	P	C	V	T	S	S	Y	C	P	P	C	1	1	1
327	C	P	P	C	P	Y	I	I	A	C	T	S	F	T	L	C	I	S	F	I	*	C	P	P	C	1	1	1
328	C	P	P	C	P	S	E	A	*	C	F	V	T	P	F	C	F	E	L	T	S	C	P	P	C	1	1	1
329	C	P	P	C	P	I	L	K	I	C	*	S	I	S	G	C	F	I	N	I	I	C	P	P	C	1	1	1
330	C	P	P	C	P	H	F	T	T	C	*	N	I	I	Q	C	Y	I	Y	I	F	C	P	P	C	1	1	1
331	C	P	P	C	P	P	D	S	L	C	L	Q	Y	T	R	C	L	F	Y	*	*	C	P	P	C	1	1	1
332	C	P	P	C	P	L	V	M	R	C	Y	F	L	S	F	C	Y	S	*	F	H	C	P	P	C	1	1	1
333	C	P	P	C	P	L	Y	Y	I	C	Y	L	Y	Y	N	C	Y	V	F	S	*	C	P	P	C	1	1	1
334	C	P	P	C	P	D	*	K	A	C	T	Y	N	M	L	C	L	M	M	K	K	C	P	P	C	1	1	1
335	C	P	P	C	P	*	S	H	Q	C	L	N	N	Y	L	C	Y	Y	I	T	I	C	P	P	C	1	1	1
336	C	P	P	C	P	L	L	K	T	C	S	V	*	T	Y	C	N	W	H	F	H	C	P	P	C	1	1	1
337	C	P	P	C	P	F	*	N	Y	C	S	V	H	Y	R	C	Y	Y	V	S	I	C	P	P	C	1	1	1
338	C	P	P	C	R	L	Y	T	N	C	I	S	*	L	Y	C	F	F	I	M	N	C	P	P	C	1	1	1
339	C	P	P	C	R	G	M	A	W	C	T	L	L	*	G	C	R	V	P	H	Y	C	P	P	C	1	1	1
340	C	P	P	C	R	Y	T	*	E	C	F	*	L	Y	F	C	S	I	K	F	H	C	P	P	C	1	1	1
341	C	P	P	C	R	W	L	E	W	C	S	Q	H	M	L	C	A	T	I	*	R	C	P	P	C	1	1	1
342	C	P	P	C	R	L	R	F	G	C	K	A	P	S	T	C	T	*	Y	K	S	C	P	P	C	1	1	1
343	C	P	P	C	R	L	S	F	G	C	K	A	P	S	T	C	T	*	Y	K	S	C	P	P	C	1	1	1
344	C	P	P	C	R	L	I	V	G	C	K	A	P	S	T	C	T	*	Y	K	S	C	P	P	C	1	1	1
345	C	P	P	C	R	F	S	P	G	C	S	A	*	T	D	C	I	L	L	D	F	C	P	P	C	1	1	1
346	C	P	P	C	R	T	R	*	W	C	T	P	H	S	L	C	I	I	*	H	M	C	P	P	C	1	1	1
347	C	P	P	C	R	S	P	P	E	C	D	I	*	P	Y	C	Y	T	N	K	F	C	P	P	C	1	1	1
348	C	P	P	C	R	S	Y	N	*	C	Q	T	I	L	Y	C	N	N	Y	F	N	C	P	P	C	1	1	1
349	C	P	P	C	R	I	M	*	W	C	H	S	G	S	F	C	F	F	Y	S	W	C	P	P	C	1	1	1
350	C	P	P	C	R	I	F	F	S	C	I	S	I	*	M	C	Y	N	N	D	N	C	P	P	C	1	1	1
351	C	P	P	C	R	Q	Y	Q	V	C	*	T	S	Y	S	C	T	Y	R	N	T	C	P	P	C	1	1	1
352	C	P	P	C	R	H	P	D	E	C	F	I	P	F	P	C	M	S	*	*	L	C	P	P	C	1	1	1
353	C	P	P	C	R	L	R	F	S	C	A	P	N	L	F	C	P	P	*	A	P	C	P	P	C	1	1	1
354	C	P	P	C	R	L	T	L	Y	C	P	Y	M	Q	S	C	L	L	*	F	N	C	P	P	C	1	1	1
355	C	P	P	C	R	D	V	N	*	C	I	P	N	T	Y	C	H	R	S	W	L	C	P	P	C	1	1	1
356	C	P	P	C	R	A	M	R	P	C	L	L	L	G	R	C	F	T	N	*	V	C	P	P	C	1	1	1
357	C	P	P	C	R	A	M	L	S	C	L	Y	*	F	N	C	N	T	I	F	H	C	P	P	C	1	1	1
358	C	P	P	C	R	V	Y	L	W	C	L	R	*	Y	Y	C	L	L	Y	N	K	C	P	P	C	1	1	1
359	C	P	P	C	R	*	D	I	Y	C	H	V	P	I	Q	C	S	Y	A	L	R	C	P	P	C	1	1	1
360	C	P	P	C	R	Y	G	W	I	C	S	G	*	I	H	C	M	Y	N	L	K	C	P	P	C	1	1	1
361	C	P	P	C	R	F	K	A	*	C	T	N	*	K	T	C	F	D	D	E	M	C	P	P	C	1	1	1
362	C	P	P	C	R	F	G	T	L	C	*	S	*	Q	M	C	N	P	G	F	K	C	P	P	C	1	1	1
363	C	P	P	C	R	F	*	F	N	C	Y	N	S	I	F	C	Y	L	I	I	K	C	P	P	C	1	1	1
364	C	P	P	C	L	K	*	D	L	C	L	S	Y	N	L	C	S	R	K	N	F	C	P	P	C	1	1	1
365	C	P	P	C	L	T	K	*	N	C	N	N	R	T	L	C	T	I	S	T	M	C	P	P	C	1	1	1
366	C	P	P	C	L	T	P	M	H	C	*	W	L	R	S	C	*	F	P	S	S	C	P	P	C	1	1	1
367	C	P	P	C	L	T	P	M	H	C	*	W	L	R	L	C	*	F	P	S	S	C	P	P	C	1	1	1
368	C	P	P	C	L	I	F	*	D	C	T	L	I	R	H	C	H	Y	K	I	L	C	P	P	C	1	1	1
369	C	P	P	C	L	P	L	M	Y	C	W	H	S	F	T	C	Y	L	*	K	Q	C	P	P	C	1	1	1
370	C	P	P	C	L	Y	S	L	G	C	P	E	Q	V	N	C	K	Q	*	A	K	C	P	P	C	1	1	1
371	C	P	P	C	L	N	*	N	F	C	P	T	L	Y	L	C	N	V	S	T	Y	C	P	P	C	1	1	1
372	C	P	P	C	L	N	Y	E	S	C	I	T	T	*	A	C	K	S	P	F	A	C	P	P	C	1	1	1
373	C	P	P	C	L	T	T	A	Q	C	T	A	F	H	*	C	R	F	H	L	Q	C	P	P	C	1	1	1
374	C	P	P	C	L	T	M	A	Q	C	T	A	F	P	*	C	R	F	H	L	Q	C	P	P	C	1	1	1
375	C	P	P	C	L	L	K	F	R	C	T	Y	P	H	*	C	L	F	Q	L	I	C	P	P	C	1	1	1
376	C	P	P	C	L	*	R	N	F	C	L	F	T	V	*	C	Y	N	Y	F	P	C	P	P	C	1	1	1
377	C	P	P	C	L	S	H	D	A	C	*	T	P	V	P	C	I	N	T	K	F	C	P	P	C	1	1	1
378	C	P	P	C	L	W	N	D	T	C	S	S	S	N	L	C	I	H	F	*	S	C	P	P	C	1	1	1
379	C	P	P	C	L	W	H	S	R	C	S	I	Y	Y	S	C	Y	T	F	*	R	C	P	P	C	1	1	1
380	C	P	P	C	E	N	P	A	Q	C	M	H	Q	I	F	C	H	*	I	S	Y	C	P	P	C	1	1	1
381	C	P	P	C	E	P	P	Y	L	C	T	Y	R	F	S	C	R	L	*	Y	I	C	P	P	C	1	1	1
382	C	P	P	C	E	E	N	S	E	C	W	Q	S	P	T	C	R	S	K	*	L	C	P	P	C	1	1	1
383	C	P	P	C	E	*	M	F	N	C	V	I	L	T	*	C	F	K	Q	H	P	C	P	P	C	1	1	1
384	C	P	P	C	E	S	L	G	R	C	*	H	S	Y	I	C	D	I	R	Q	L	C	P	P	C	1	1	1
385	C	P	P	C	E	W	E	N	R	C	V	*	R	L	L	C	I	N	Y	Y	*	C	P	P	C	1	1	1
386	C	P	P	C	E	F	*	K	D	C	Y	L	I	K	K	C	F	Y	N	F	I	C	P	P	C	1	1	1
387	C	P	P	C	D	V	*	F	R	C	F	F	Q	I	H	C	F	Y	I	L	Y	C	P	P	C	1	1	1
388	C	P	P	C	D	*	H	F	Y	C	N	L	F	F	T	C	Y	S	H	F	Y	C	P	P	C	1	1	1
389	C	P	P	C	D	Y	F	*	N	C	N	D	I	I	F	C	Y	S	N	F	F	C	P	P	C	1	1	1
390	C	P	P	C	A	N	Y	F	H	C	F	N	*	F	P	C	N	Y	F	H	Y	C	P	P	C	1	1	1
391	C	P	P	C	A	T	Y	D	V	C	E	G	R	K	T	C	L	K	*	N	A	C	P	P	C	1	1	1
392	C	P	P	C	A	R	T	K	Q	C	*	K	R	L	F	C	I	Y	K	L	S	C	P	P	C	1	1	1
393	C	P	P	C	A	*	R	S	A	C	H	N	P	S	T	C	S	I	P	Y	D	C	P	P	C	1	1	1
394	C	P	P	C	A	T	R	N	I	C	P	S	I	*	Y	C	F	H	L	T	H	C	P	P	C	1	1	1
395	C	P	P	C	A	R	L	E	L	C	N	S	R	S	G	C	F	D	*	L	P	C	P	P	C	1	1	1
396	C	P	P	C	A	R	L	E	L	C	N	S	M	R	G	C	F	D	*	L	P	C	P	P	C	1	1	1
397	C	P	P	C	A	R	L	E	L	C	T	S	M	S	G	C	F	D	*	L	P	C	P	P	C	1	1	1
398	C	P	P	C	A	L	N	S	H	C	*	Q	S	N	L	C	R	E	L	Q	F	C	P	P	C	1	1	1
399	C	P	P	C	A	*	S	F	H	C	D	F	Y	H	T	C	I	I	I	H	S	C	P	P	C	1	1	1
400	C	P	P	C	A	L	F	*	E	C	Y	I	F	T	N	C	I	Y	N	*	N	C	P	P	C	1	1	1
401	C	P	P	C	G	H	T	T	S	C	*	H	I	H	P	C	Y	N	K	T	M	C	P	P	C	1	1	1
402	C	P	P	C	G	H	A	P	V	C	L	S	K	S	M	C	P	P	N	*	W	C	P	P	C	1	1	1
403	C	P	P	C	G	P	*	S	T	C	G	V	P	P	L	C	H	N	R	N	N	C	P	P	C	1	1	1
404	C	P	P	C	G	Y	M	K	I	C	*	S	T	I	F	C	N	I	Y	L	A	C	P	P	C	1	1	1
405	C	P	P	C	G	Y	*	D	E	C	S	K	A	F	M	C	T	R	L	T	F	C	P	P	C	1	1	1
406	C	P	P	C	G	T	Q	*	Y	C	*	R	E	S	Y	C	P	I	I	W	V	C	P	P	C	1	1	1
407	C	P	P	C	G	M	M	*	*	C	T	Y	W	R	I	C	S	V	N	L	K	C	P	P	C	1	1	1
408	C	P	P	C	G	I	*	S	T	C	A	L	I	P	S	C	R	S	D	L	L	C	P	P	C	1	1	1
409	C	P	P	C	G	H	*	P	R	C	P	D	K	L	S	C	F	A	A	K	A	C	P	P	C	1	1	1
410	C	P	P	C	G	G	S	S	*	C	L	I	M	I	H	C	S	I	M	Y	N	C	P	P	C	1	1	1
411	C	P	P	C	V	S	P	R	L	C	F	*	M	R	L	C	L	S	V	I	A	C	P	P	C	1	1	1
412	C	P	P	C	V	S	K	F	T	C	M	D	H	F	F	C	Y	I	L	*	D	C	P	P	C	1	1	1
413	C	P	P	C	V	Y	Q	N	R	C	H	V	T	H	N	C	P	D	L	*	R	C	P	P	C	1	1	1
414	C	P	P	C	V	S	Y	K	*	C	I	P	N	M	P	C	N	D	F	R	T	C	P	P	C	1	1	1
415	C	P	P	C	V	W	L	H	G	C	P	*	R	N	H	C	L	Y	K	V	L	C	P	P	C	1	1	1
416	C	P	P	C	V	F	*	M	M	C	A	D	Q	K	H	C	R	I	R	I	N	C	P	P	C	1	1	1
417	C	P	P	C	*	N	D	T	W	C	I	P	F	H	H	C	F	F	H	*	M	C	P	P	C	1	1	1
418	C	P	P	C	*	T	R	S	R	C	F	T	L	V	L	C	I	R	Q	F	Y	C	P	P	C	1	1	1
419	C	P	P	C	*	T	L	I	V	C	R	N	F	S	Y	C	F	L	Y	S	T	C	P	P	C	1	1	1
420	C	P	P	C	*	T	V	S	D	C	S	S	L	Y	F	C	N	R	T	H	I	C	P	P	C	1	1	1
421	C	P	P	C	*	T	Y	V	I	C	F	N	I	N	L	C	I	S	N	Y	N	C	P	P	C	1	1	1
422	C	P	P	C	*	I	F	S	F	C	I	S	F	F	F	C	N	I	N	N	Y	C	P	P	C	1	1	1
423	C	P	P	C	*	H	N	L	H	C	F	N	T	Y	L	C	N	Y	M	L	I	C	P	P	C	1	1	1
424	C	P	P	C	*	R	Y	T	L	C	Y	Y	I	S	D	C	I	Y	I	F	Y	C	P	P	C	1	1	1
425	C	P	P	C	*	E	S	T	K	C	S	P	Q	V	L	C	R	L	V	N	I	C	P	P	C	1	1	1
426	C	P	P	C	*	D	F	L	F	C	D	I	H	I	I	C	N	R	T	Q	H	C	P	P	C	1	1	1
427	C	P	P	C	*	A	P	K	R	C	L	N	R	T	L	C	F	T	F	I	I	C	P	P	C	1	1	1
428	C	P	P	C	*	A	P	K	R	C	L	N	R	M	L	C	F	T	F	I	I	C	P	P	C	1	1	1
429	C	P	P	C	*	A	S	V	I	C	F	A	A	Y	M	C	*	T	H	S	F	C	P	P	C	1	1	1
430	C	P	P	C	*	V	I	L	I	C	F	S	H	T	L	C	Q	I	I	L	F	C	P	P	C	1	1	1
431	C	P	P	C	*	Y	Q	M	Y	C	Y	F	S	I	I	C	F	N	I	Y	F	C	P	P	C	1	1	1
432	C	P	P	C	*	Y	Y	Y	Y	C	F	K	L	F	D	C	L	Y	F	T	I	C	P	P	C	1	1	1
433	C	P	P	C	*	F	N	Y	N	C	Y	I	F	F	F	C	F	Y	Y	H	F	C	P	P	C	1	1	1
434	C	P	P	C	*	F	I	S	G	C	F	N	L	I	F	C	E	R	V	Y	S	C	P	P	C	1	1	1
435	C	P	P	C	*	F	I	S	W	C	V	N	L	I	F	C	E	R	L	Y	S	C	P	P	C	1	1	1
436	C	P	P	C	*	F	S	V	H	C	Y	T	Y	S	I	C	S	S	L	N	S	C	P	P	C	1	1	1
437	C	P	P	C	*	F	S	V	P	C	Y	T	Y	S	I	C	S	S	L	N	R	C	P	P	C	1	1	1
438	C	P	P	C	*	F	S	S	H	C	N	N	N	F	P	C	F	L	S	Y	N	C	P	P	C	1	1	1
439	C	P	P	C	Y	N	V	W	F	C	F	H	Y	Y	H	C	M	N	*	S	T	C	P	P	C	1	1	1
440	C	P	P	C	Y	N	Y	F	F	C	N	N	R	S	I	C	N	N	*	N	N	C	P	P	C	1	1	1
441	C	P	P	C	Y	N	S	I	*	C	F	S	I	I	F	C	F	F	N	N	S	C	P	P	C	1	1	1
442	C	P	P	C	Y	R	I	I	Y	C	M	S	L	N	I	C	S	L	R	I	*	C	P	P	C	1	1	1
443	C	P	P	C	Y	R	I	I	S	C	M	S	L	N	I	C	S	L	R	I	*	C	P	P	C	1	1	1
444	C	P	P	C	Y	I	S	Q	N	C	*	S	T	L	R	C	V	N	R	S	N	C	P	P	C	1	1	1
445	C	P	P	C	Y	I	S	Q	T	C	*	S	T	L	R	C	F	N	R	S	N	C	P	P	C	1	1	1
446	C	P	P	C	Y	Q	P	N	L	C	N	F	*	N	T	C	F	F	M	*	L	C	P	P	C	1	1	1
447	C	P	P	C	Y	P	N	F	Y	C	L	N	S	H	S	C	Q	W	I	*	M	C	P	P	C	1	1	1
448	C	P	P	C	Y	L	F	*	Y	C	F	Y	Y	F	F	C	Y	F	T	N	Y	C	P	P	C	1	1	1
449	C	P	P	C	Y	V	E	P	*	C	V	L	*	N	I	C	R	L	S	Y	D	C	P	P	C	1	1	1
450	C	P	P	C	Y	F	R	E	R	C	R	I	I	F	W	C	G	F	V	S	*	C	P	P	C	1	1	1
451	C	P	P	C	Y	F	R	E	S	C	R	I	I	F	W	C	G	F	V	S	*	C	P	P	C	1	1	1
452	C	P	P	C	Y	F	R	D	S	C	R	I	I	L	W	C	G	F	V	S	*	C	P	P	C	1	1	1
453	C	P	P	C	Y	F	R	D	S	C	R	V	I	F	W	C	G	F	V	S	*	C	P	P	C	1	1	1
454	C	P	P	C	Y	F	R	D	I	C	R	I	I	F	W	C	G	F	V	S	*	C	P	P	C	1	1	1
455	C	P	P	C	Y	F	S	D	S	C	R	I	I	F	W	C	G	F	V	S	*	C	P	P	C	1	1	1
456	C	P	P	C	Y	F	M	D	S	C	R	I	I	F	W	C	G	F	V	S	*	C	P	P	C	1	1	1
457	C	P	P	C	Y	F	G	D	S	C	R	I	I	F	W	C	G	F	V	S	*	C	P	P	C	1	1	1
458	C	P	P	C	Y	F	*	P	N	C	Y	E	I	Y	S	C	N	F	P	I	K	C	P	P	C	1	1	1
459	C	P	P	C	Y	F	Y	V	*	C	Y	N	L	S	T	C	I	N	L	D	Y	C	P	P	C	1	1	1
460	C	P	P	C	S	D	M	L	P	C	Y	*	H	N	K	C	S	N	L	V	Y	C	P	P	C	1	1	1
461	C	P	P	C	S	S	V	I	R	C	*	S	N	W	P	C	F	P	Q	R	Q	C	P	P	C	1	1	1
462	C	P	P	C	S	S	Y	I	T	C	*	Y	L	K	T	C	S	Y	L	S	L	C	P	P	C	1	1	1
463	C	P	P	C	S	H	F	F	Y	C	Y	Y	F	I	*	C	I	I	Y	Y	N	C	P	P	C	1	1	1
464	C	P	P	C	S	Y	D	Y	A	C	Y	H	L	*	I	C	Q	F	L	M	N	C	P	P	C	1	1	1
465	C	P	P	C	S	Y	F	M	I	C	Y	S	N	H	*	C	L	F	L	Y	S	C	P	P	C	1	1	1
466	C	P	P	C	S	S	I	M	L	C	H	R	F	T	I	C	*	F	S	I	F	C	P	P	C	1	1	1
467	C	P	P	C	S	F	*	N	I	C	I	I	R	F	S	C	F	F	Y	L	I	C	P	P	C	1	1	1
468	C	P	P	C	S	F	Y	N	N	C	N	S	S	K	N	C	I	F	N	*	L	C	P	P	C	1	1	1
469	C	P	P	C	W	N	A	L	W	C	I	S	L	T	*	C	F	F	Q	V	T	C	P	P	C	1	1	1
470	C	P	P	C	W	N	L	S	N	C	*	N	T	H	F	C	L	I	N	F	Y	C	P	P	C	1	1	1
471	C	P	P	C	W	T	L	S	N	C	*	N	N	H	F	C	L	I	N	F	Y	C	P	P	C	1	1	1
472	C	P	P	C	W	R	A	L	R	C	A	K	L	H	L	C	A	D	*	V	K	C	P	P	C	1	1	1
473	C	P	P	C	W	M	S	G	L	C	V	P	*	R	N	C	S	K	T	H	K	C	P	P	C	1	1	1
474	C	P	P	C	W	L	D	Q	V	C	T	N	W	*	L	C	W	Y	R	K	V	C	P	P	C	1	1	1
475	C	P	P	C	W	L	P	*	P	C	L	Q	P	R	I	C	L	R	Y	S	M	C	P	P	C	1	1	1
476	C	P	P	C	W	L	D	Q	V	C	T	N	W	*	F	C	W	S	R	K	V	C	P	P	C	1	1	1
477	C	P	P	C	W	L	F	S	H	C	F	Y	F	H	L	C	V	N	R	N	*	C	P	P	C	1	1	1
478	C	P	P	C	W	D	N	N	N	C	*	Y	R	I	Y	C	F	N	N	L	N	C	P	P	C	1	1	1
479	C	P	P	C	W	*	T	S	T	C	I	Y	S	N	N	C	N	I	L	F	I	C	P	P	C	1	1	1
480	C	P	P	C	W	F	F	Y	W	C	K	S	M	F	L	C	V	Y	F	*	K	C	P	P	C	1	1	1
481	C	P	P	C	L	H	L	Q	M	C	I	N	F	Y	F	C	L	I	F	*	F	C	P	P	C	1	1	1
482	C	P	P	C	L	*	T	L	*	C	F	L	F	F	F	C	F	Y	H	I	F	C	P	P	C	1	1	1
483	C	P	P	C	L	S	M	*	Y	C	T	N	S	L	S	C	L	I	P	F	Q	C	P	P	C	1	1	1
484	C	P	P	C	F	N	N	H	L	C	L	N	L	Q	V	C	*	N	R	S	R	C	P	P	C	1	1	1
485	C	P	P	C	F	N	Y	Y	F	C	T	F	F	F	N	C	N	I	I	Y	*	C	P	P	C	1	1	1
486	C	P	P	C	F	S	L	I	I	C	P	F	*	I	H	C	S	R	H	M	Y	C	P	P	C	1	1	1
487	C	P	P	C	F	I	L	T	*	C	F	Y	L	F	Y	C	F	N	I	F	F	C	P	P	C	1	1	1
488	C	P	P	C	F	I	L	S	*	C	I	F	F	F	T	C	I	N	I	F	F	C	P	P	C	1	1	1
489	C	P	P	C	F	I	D	D	Q	C	H	S	S	A	*	C	I	N	N	L	M	C	P	P	C	1	1	1
490	C	P	P	C	F	I	D	D	Q	C	H	S	S	A	*	C	S	N	N	L	M	C	P	P	C	1	1	1
491	C	P	P	C	F	G	E	I	D	C	L	G	S	N	Y	C	L	N	I	*	F	C	P	P	C	1	1	1
492	C	P	P	C	F	V	*	F	I	C	D	I	F	M	I	C	F	Y	V	M	F	C	P	P	C	1	1	1
493	C	P	P	C	F	Y	S	*	S	C	N	P	F	K	P	C	R	S	V	L	T	C	P	P	C	1	1	1
494	C	P	P	C	F	Y	G	V	V	C	L	*	M	S	S	C	L	P	E	V	P	C	P	P	C	1	1	1
495	C	P	P	C	F	Y	F	T	I	C	Y	Y	M	Y	Y	C	G	I	I	*	D	C	P	P	C	1	1	1
496	C	P	P	C	F	W	L	*	S	C	L	R	Q	L	I	C	F	Y	I	F	*	C	P	P	C	1	1	1
497	C	P	P	C	F	F	N	N	*	C	I	R	F	Y	Y	C	F	Y	Y	Y	F	C	P	P	C	1	1	1
498	C	P	P	C	F	F	P	*	L	C	I	P	N	F	T	C	M	Y	*	N	L	C	P	P	C	1	1	1
499	C	P	P	C	F	F	E	M	L	C	*	I	F	Y	S	C	F	T	K	P	N	C	P	P	C	1	1	1
500	C	P	P	C	S	F	*	L	N	C	M	S	P	V	A	C	S	E	Y	S	D	C	P	P	C	1	1	1
501	C	P	P	C	Y	F	R	D	S	C	R	I	I	F	W	C	G	F	V	S	*	C	P	P	C	11	8	0.727273
502	C	P	P	C	I	*	N	F	V	C	Y	I	I	I	F	C	N	I	L	Y	S	C	P	P	C	6	3	0.5
503	C	P	P	C	T	R	Q	I	D	C	W	K	S	H	M	C	I	R	L	*	Y	C	P	P	C	2	1	0.5
504	C	P	P	C	T	R	*	I	D	C	W	K	S	H	M	C	I	R	L	*	Y	C	P	P	C	2	1	0.5
505	C	P	P	C	R	N	N	T	R	C	N	T	*	I	L	C	N	N	I	L	Y	C	P	P	C	2	1	0.5
506	C	P	P	C	M	S	L	F	*	C	S	*	K	G	V	C	F	S	F	P	T	C	P	P	C	2	1	0.5
507	C	P	P	C	R	V	A	R	N	C	A	S	L	S	Y	C	*	T	T	E	V	C	P	P	C	2	1	0.5
508	C	P	P	C	R	A	*	V	Y	C	S	A	L	P	I	C	R	P	Q	Q	H	C	P	P	C	2	1	0.5
509	C	P	P	C	E	N	V	V	R	C	Y	T	S	N	L	C	H	V	*	N	I	C	P	P	C	2	1	0.5
510	C	P	P	C	A	R	L	E	L	C	N	S	M	S	G	C	F	D	*	L	P	C	P	P	C	2	1	0.5
511	C	P	P	C	G	*	T	H	V	C	K	F	F	T	D	C	Y	V	R	Q	I	C	P	P	C	2	1	0.5
512	C	P	P	C	L	R	P	W	N	C	P	S	L	P	F	C	L	T	A	N	*	C	P	P	C	2	1	0.5
513	C	P	P	C	S	Y	F	*	F	C	I	Y	Y	Y	F	C	F	F	V	S	S	C	P	P	C	2	1	0.5
514	C	P	P	C	I	S	L	Q	S	C	L	T	R	T	L	C	K	S	*	I	D	C	P	P	C	3	1	0.333333
515	C	P	P	C	L	T	M	A	Q	C	T	A	F	H	*	C	R	F	H	L	Q	C	P	P	C	3	1	0.333333
516	C	P	P	C	L	T	M	A	Q	C	T	A	F	H	*	C	R	F	H	L	Q	C	P	P	C	3	1	0.333333
517	C	P	P	C	*	*	F	N	I	C	N	H	I	F	Y	C	Y	N	H	Y	Y	C	P	P	C	3	1	0.333333
518	C	P	P	C	I	F	H	N	H	C	N	Y	*	F	I	C	F	S	I	F	N	C	P	P	C	4	1	0.25
519	C	P	P	C	K	I	F	*	M	C	T	L	Q	N	I	C	F	S	F	S	S	C	P	P	C	5	1	0.2
520	C	P	P	C	Q	W	*	T	R	C	R	L	L	L	R	C	V	L	S	D	R	C	P	P	C	16	3	0.1875
521	C	P	P	C	Y	F	R	D	S	C	R	I	I	F	W	C	G	F	V	S	*	C	P	P	C	11	2	0.181818
522	C	P	P	C	Y	F	R	D	S	C	R	I	I	F	W	C	G	F	V	S	*	C	P	P	C	11	2	0.181818
523	C	P	P	C	Y	I	S	Q	N	C	*	S	T	L	R	C	F	N	R	S	N	C	P	P	C	6	1	0.166667
524	C	P	P	C	I	*	N	F	V	C	Y	I	I	I	F	C	N	I	L	Y	S	C	P	P	C	6	1	0.166667
525	C	P	P	C	I	*	N	F	V	C	*	I	I	I	F	C	N	I	L	Y	S	C	P	P	C	6	1	0.166667
526	C	P	P	C	I	*	N	F	V	C	Y	I	I	I	F	C	N	I	L	Y	S	C	P	P	C	6	1	0.166667
527	C	P	P	C	I	*	N	F	V	C	Y	I	I	I	F	C	N	I	L	Y	S	C	P	P	C	6	1	0.166667
528	C	P	P	C	I	L	N	S	S	C	*	H	S	T	L	C	Y	N	L	D	D	C	P	P	C	7	1	0.142857
529	C	P	P	C	Y	F	R	D	S	C	R	I	I	F	W	C	G	F	V	S	*	C	P	P	C	11	1	0.0909091
530	C	P	P	C	Y	F	R	D	S	C	R	I	I	F	W	C	G	F	V	S	*	C	P	P	C	11	1	0.0909091
531	C	P	P	C	Y	F	R	D	S	C	R	I	I	F	W	C	G	F	V	S	*	C	P	P	C	11	1	0.0909091
532	C	P	P	C	S	H	Y	N	*	C	Y	I	H	P	Y	C	Y	T	N	H	F	C	P	P	C	12	1	0.0833333
533	C	P	P	C	S	H	Y	N	*	C	Y	I	H	P	Y	C	Y	T	N	H	F	C	P	P	C	12	1	0.0833333
534	C	P	P	C	S	H	Y	N	*	C	Y	I	H	P	Y	C	Y	T	N	H	F	C	P	P	C	12	1	0.0833333
535	C	P	P	C	L	N	Y	D	L	C	L	S	*	N	L	C	S	R	K	N	F	C	P	P	C	15	1	0.0666667
536	C	P	P	C	Y	I	N	F	I	C	L	F	V	M	I	C	F	*	F	T	N	C	P	P	C	21	1	0.047619
	*: terminator
