# Supplementary material for: Selection and evolution of disulfide-rich peptides via cellular protein quality control
Source: Chem Sci. 2023 Mar 15;14(13):3668–75. doi: 10.1039/d2sc05343h (PMC10055976; doi:10.1039/d2sc05343h)
Supplement: SC-014-D2SC05343H-s003 [file SC-014-D2SC05343H-s003.xlsx]

## Sheet: Library-2 S1-P9
Number	Sequences																																			Abundance
																																				Input	P9	Normalization
1	C	P	P	C	R	F	T	L	S	Q	D	Y	L	F	C	G	N	F	Y	A	P	I	R	A	M	C	N	D	S	V	P	C	P	P	C	1	411	411
2	C	P	P	C	R	F	T	L	S	P	W	V	S	P	C	S	N	P	H	W	P	I	R	A	M	C	N	D	S	V	P	C	P	P	C	1	314	314
3	C	P	P	C	R	F	T	L	S	E	D	N	L	R	C	G	K	W	T	M	P	I	R	A	M	C	N	D	S	V	P	C	P	P	C	1	256	256
4	C	P	P	C	R	F	T	L	S	A	E	T	N	G	C	Q	G	T	R	R	P	I	R	A	M	C	N	D	S	V	P	C	P	P	C	1	234	234
5	C	P	P	C	R	F	T	L	S	T	A	N	P	L	C	I	R	P	Y	P	P	I	R	A	M	C	N	D	S	V	P	C	P	P	C	1	75	75
6	C	P	P	C	R	F	T	L	S	R	M	A	Y	K	C	P	T	P	I	S	P	I	R	A	M	C	N	D	S	V	P	C	P	P	C	1	75	75
7	C	P	P	C	R	F	T	L	S	M	G	N	A	S	C	L	N	F	T	V	P	I	R	A	M	C	N	D	S	V	P	C	P	P	C	1	48	48
8	C	P	P	C	R	F	T	L	S	D	S	S	M	N	C	S	T	K	T	K	P	I	R	A	M	C	N	D	S	V	P	C	P	P	C	1	43	43
9	C	P	P	C	R	F	T	L	S	P	P	N	G	G	C	N	F	S	D	I	P	I	R	A	M	C	N	D	S	V	P	C	P	P	C	1	39	39
10	C	P	P	C	R	F	T	L	S	L	P	V	T	N	C	P	P	Q	V	A	P	I	R	A	M	C	N	D	S	V	P	C	P	P	C	1	37	37
11	C	P	P	C	R	F	T	L	S	T	D	R	I	A	C	G	P	M	N	V	P	I	R	A	M	C	N	D	S	V	P	C	P	P	C	1	35	35
12	C	P	P	C	R	F	T	L	S	P	L	P	R	L	C	T	G	P	T	K	P	I	R	A	M	C	N	D	S	V	P	C	P	P	C	1	29	29
13	C	P	P	C	R	F	T	L	S	N	L	S	L	P	C	L	V	T	A	V	P	I	R	A	M	C	N	D	S	V	P	C	P	P	C	1	26	26
14	C	P	P	C	R	F	T	L	S	T	T	L	E	P	C	R	I	R	V	I	P	I	R	A	M	C	N	D	S	V	P	C	P	P	C	1	26	26
15	C	P	P	C	R	F	T	L	S	I	E	R	R	W	C	G	S	R	S	L	P	I	R	A	M	C	N	D	S	V	P	C	P	P	C	1	22	22
16	C	P	P	C	R	F	T	L	S	Q	R	A	S	P	C	T	P	L	A	V	P	I	R	A	M	C	N	D	S	V	P	C	P	P	C	1	20	20
17	C	P	P	C	R	F	T	L	S	H	P	P	N	P	C	Q	L	F	R	G	P	I	R	A	M	C	N	D	S	V	P	C	P	P	C	1	20	20
18	C	P	P	C	R	F	T	L	S	A	P	S	E	P	C	S	F	E	S	L	P	I	R	A	M	C	N	D	S	V	P	C	P	P	C	1	20	20
19	C	P	P	C	R	F	T	L	S	P	L	P	E	S	C	S	S	M	V	R	P	I	R	A	M	C	N	D	S	V	P	C	P	P	C	1	16	16
20	C	P	P	C	R	F	T	L	S	P	P	R	A	P	C	V	V	N	F	T	P	I	R	A	M	C	N	D	S	V	P	C	P	P	C	1	14	14
21	C	P	P	C	R	F	T	L	S	A	P	P	S	L	C	R	A	V	R	R	P	I	R	A	M	C	N	D	S	V	P	C	P	P	C	1	14	14
22	C	P	P	C	R	F	T	L	S	Q	R	R	S	L	C	E	T	Y	P	T	P	I	R	A	M	C	N	D	S	V	P	C	P	P	C	1	13	13
23	C	P	P	C	R	F	T	L	S	L	R	N	S	V	C	L	W	V	R	M	P	I	R	A	M	C	N	D	S	V	P	C	P	P	C	1	13	13
24	C	P	P	C	R	F	T	L	S	V	K	I	D	G	C	S	M	N	V	Y	P	I	R	A	M	C	N	D	S	V	P	C	P	P	C	1	13	13
25	C	P	P	C	R	F	T	L	S	V	T	P	L	P	C	T	P	A	P	P	P	I	R	A	M	C	N	D	S	V	P	C	P	P	C	1	13	13
26	C	P	P	C	R	F	T	L	S	H	S	P	T	R	C	S	M	G	R	L	P	I	R	A	M	C	N	D	S	V	P	C	P	P	C	1	12	12
27	C	P	P	C	R	F	T	L	S	P	I	F	H	N	C	T	P	H	I	I	P	I	R	A	M	C	N	D	S	V	P	C	P	P	C	1	12	12
28	C	P	P	C	R	F	T	L	S	D	T	V	V	K	C	D	N	E	S	F	P	I	R	A	M	C	N	D	S	V	P	C	P	P	C	1	12	12
29	C	P	P	C	R	F	T	L	S	G	L	S	L	H	C	G	D	A	Q	M	P	I	R	A	M	C	N	D	S	V	P	C	P	P	C	1	12	12
30	C	P	P	C	R	F	T	L	S	N	H	Y	R	W	C	L	T	M	H	L	P	I	R	A	M	C	N	D	S	V	P	C	P	P	C	1	10	10
31	C	P	P	C	R	F	T	L	S	P	P	K	Y	P	C	S	V	P	I	Q	P	I	R	A	M	C	N	D	S	V	P	C	P	P	C	1	10	10
32	C	P	P	C	R	F	T	L	S	D	I	G	R	V	C	E	A	L	T	S	P	I	R	A	M	C	N	D	S	V	P	C	P	P	C	1	10	10
33	C	P	P	C	R	F	T	L	S	T	A	G	P	P	C	S	P	N	L	P	P	I	R	A	M	C	N	D	S	V	P	C	P	P	C	1	8	8
34	C	P	P	C	R	F	T	L	S	Y	D	E	A	G	C	W	V	T	F	L	P	I	R	A	M	C	N	D	S	V	P	C	P	P	C	1	8	8
35	C	P	P	C	R	F	T	L	S	N	Y	T	E	M	C	R	K	Y	N	T	P	I	R	A	M	C	N	D	S	V	P	C	P	P	C	1	7	7
36	C	P	P	C	R	F	T	L	S	G	G	P	A	G	C	R	P	L	L	N	P	I	R	A	M	C	N	D	S	V	P	C	P	P	C	1	7	7
37	C	P	P	C	R	F	T	L	S	G	W	N	K	S	C	D	G	I	G	E	P	I	R	A	M	C	N	D	S	V	P	C	P	P	C	1	7	7
38	C	P	P	C	R	F	T	L	S	T	R	M	P	V	C	A	R	S	R	V	P	I	R	A	M	C	N	D	S	V	P	C	P	P	C	1	6	6
39	C	P	P	C	R	F	T	L	S	R	R	P	L	P	C	L	A	G	A	V	P	I	R	A	M	C	N	D	S	V	P	C	P	P	C	1	6	6
40	C	P	P	C	R	F	T	L	S	A	S	A	I	P	C	W	L	R	T	G	P	I	R	A	M	C	N	D	S	V	P	C	P	P	C	1	6	6
41	C	P	P	C	R	F	T	L	S	S	T	I	M	P	C	P	P	P	A	G	P	I	R	A	M	C	N	D	S	V	P	C	P	P	C	1	6	6
42	C	P	P	C	R	F	T	L	S	T	S	S	P	P	C	A	L	A	S	S	P	I	R	A	M	C	N	D	S	V	P	C	P	P	C	1	5	5
43	C	P	P	C	R	F	T	L	S	T	G	I	G	N	C	T	M	R	A	S	P	I	R	P	M	C	N	D	S	V	P	C	P	P	C	1	5	5
44	C	P	P	C	R	F	T	L	S	S	L	P	A	N	C	F	N	S	T	L	P	I	R	A	M	C	N	D	S	V	P	C	P	P	C	1	5	5
45	C	P	P	C	R	F	T	L	S	S	G	H	N	L	C	K	F	N	V	V	P	I	R	A	M	C	N	D	S	V	P	C	P	P	C	1	5	5
46	C	P	P	C	R	F	T	L	S	P	T	K	H	P	C	P	R	P	V	L	P	I	R	A	M	C	N	D	S	V	P	C	P	P	C	1	5	5
47	C	P	P	C	R	F	T	L	S	P	P	Q	V	G	C	A	K	G	N	S	P	I	R	A	M	C	N	D	S	V	P	C	P	P	C	1	5	5
48	C	P	P	C	R	F	T	L	S	P	Y	R	R	M	C	N	E	S	L	V	P	I	R	A	M	C	N	D	S	V	P	C	P	P	C	1	5	5
49	C	P	P	C	R	F	T	L	S	Y	S	N	T	V	C	N	L	L	I	A	P	I	R	A	M	C	N	D	S	V	P	C	P	P	C	1	5	5
50	C	P	P	C	R	F	T	L	S	S	R	L	L	P	C	R	E	A	G	P	P	I	R	A	M	C	N	D	S	V	P	C	P	P	C	1	5	5
51	C	P	P	C	R	F	T	L	S	T	M	G	R	N	C	S	W	P	T	S	P	I	R	A	M	C	N	D	S	V	P	C	P	P	C	1	4	4
52	C	P	P	C	R	F	T	L	S	T	T	A	E	N	C	L	S	L	G	T	P	I	R	A	M	C	N	D	S	V	P	C	P	P	C	1	4	4
53	C	P	P	C	R	F	T	L	S	D	R	K	L	N	C	M	N	G	S	I	P	I	R	A	M	C	N	D	S	V	P	C	P	P	C	1	4	4
54	C	P	P	C	R	F	T	L	S	V	L	G	V	L	C	N	M	P	S	Q	P	I	R	A	M	C	N	D	S	V	P	C	P	P	C	1	4	4
55	C	P	P	C	R	F	T	L	S	N	R	I	R	P	C	P	V	G	L	G	P	I	R	A	M	C	N	D	S	V	P	C	P	P	C	1	3	3
56	C	P	P	C	R	F	T	L	S	N	E	T	M	P	C	R	L	G	A	Y	P	I	R	A	M	C	N	D	S	V	P	C	P	P	C	1	3	3
57	C	P	P	C	R	F	T	L	S	N	W	S	L	F	C	G	A	H	G	F	P	I	R	A	M	C	N	D	S	V	P	C	P	P	C	1	3	3
58	C	P	P	C	R	F	T	L	S	T	P	P	H	N	C	R	P	F	L	R	P	I	R	A	M	C	N	D	S	V	P	C	P	P	C	1	3	3
59	C	P	P	C	R	F	T	L	S	R	L	N	G	S	C	I	L	T	D	Q	P	I	R	A	M	C	N	D	S	V	P	C	P	P	C	1	3	3
60	C	P	P	C	R	F	T	L	S	H	D	S	F	I	C	G	N	V	R	Y	P	I	R	A	M	C	N	D	S	V	P	C	P	P	C	1	3	3
61	C	P	P	C	R	F	T	L	S	P	P	R	A	P	C	V	V	N	F	K	P	I	R	A	M	C	N	D	S	V	P	C	P	P	C	1	3	3
62	C	P	P	C	R	F	T	L	S	R	Q	V	I	W	C	G	V	S	P	L	P	I	R	A	M	C	N	D	S	V	P	C	P	P	C	1	3	3
63	C	P	P	C	R	F	T	L	S	L	T	D	L	S	C	G	A	Y	T	L	P	I	R	A	M	C	N	D	S	V	P	C	P	P	C	1	3	3
64	C	P	P	C	R	F	T	L	S	L	A	V	T	R	C	M	I	Q	Y	Y	P	I	R	A	M	C	N	D	S	V	P	C	P	P	C	1	3	3
65	C	P	P	C	R	F	T	L	S	L	L	S	R	P	C	S	S	A	G	N	P	I	R	A	M	C	N	D	S	V	P	C	P	P	C	1	3	3
66	C	P	P	C	R	F	T	L	S	D	I	S	K	G	C	S	D	F	W	F	P	I	R	A	M	C	N	D	S	V	P	C	P	P	C	1	3	3
67	C	P	P	C	R	F	T	L	S	D	Q	Y	L	A	C	V	P	E	A	*	P	I	R	A	M	C	N	D	S	V	P	C	P	P	C	1	3	3
68	C	P	P	C	R	F	T	L	S	D	W	P	H	S	C	F	I	I	F	S	P	I	R	A	M	C	N	D	S	V	P	C	P	P	C	1	3	3
69	C	P	P	C	R	F	T	L	S	A	N	S	V	R	C	T	R	E	A	F	P	I	R	A	M	C	N	D	S	V	P	C	P	P	C	1	3	3
70	C	P	P	C	R	F	T	L	S	A	R	R	G	P	C	M	M	G	A	H	P	I	R	A	M	C	N	D	S	V	P	C	P	P	C	1	3	3
71	C	P	P	C	R	F	T	L	S	A	L	Q	I	A	C	H	T	L	V	L	P	I	R	A	M	C	N	D	S	V	P	C	P	P	C	1	3	3
72	C	P	P	C	R	F	T	L	S	G	P	G	F	P	C	T	E	L	Y	N	P	I	R	A	M	C	N	D	S	V	P	C	P	P	C	1	3	3
73	C	P	P	C	R	F	T	L	S	G	D	V	H	I	C	V	R	F	F	V	P	I	R	A	M	C	N	D	S	V	P	C	P	P	C	1	3	3
74	C	P	P	C	R	F	T	L	S	V	P	R	G	P	C	I	H	Y	G	T	P	I	R	A	M	C	N	D	S	V	P	C	P	P	C	1	3	3
75	C	P	P	C	R	F	T	L	S	V	T	H	G	S	C	Q	V	D	S	S	P	I	R	A	M	C	N	D	S	V	P	C	P	P	C	1	3	3
76	C	P	P	C	R	F	T	L	S	S	I	K	S	M	C	W	I	T	P	L	P	I	R	A	M	C	N	D	S	V	P	C	P	P	C	1	3	3
77	C	P	P	C	R	F	T	P	S	P	T	K	H	P	C	P	R	P	V	L	P	I	R	A	M	C	N	D	S	V	P	C	P	P	C	1	2	2
78	C	P	P	C	R	F	T	L	S	N	E	T	P	V	C	P	E	S	K	G	P	I	R	A	M	C	N	D	S	V	P	C	P	P	C	1	2	2
79	C	P	P	C	R	F	T	L	S	N	A	L	L	V	C	R	N	I	S	R	P	I	R	A	M	C	N	D	S	V	P	C	P	P	C	1	2	2
80	C	P	P	C	R	F	T	L	S	T	S	S	P	P	C	A	L	A	S	S	P	I	R	A	M	C	N	D	S	V	P	C	P	P	C	1	2	2
81	C	P	P	C	R	F	T	L	S	T	T	A	T	L	C	R	D	V	Q	G	P	I	R	A	M	C	N	D	S	V	P	C	P	P	C	1	2	2
82	C	P	P	C	R	F	T	L	S	T	V	A	T	P	C	V	G	T	W	T	P	I	R	A	M	C	N	D	S	V	P	C	P	P	C	1	2	2
83	C	P	P	C	R	F	T	L	S	T	L	P	N	D	C	Y	W	D	M	L	P	I	R	A	M	C	N	D	S	V	P	C	P	P	C	1	2	2
84	C	P	P	C	R	F	T	L	S	S	T	D	K	P	C	S	A	S	L	L	P	I	R	A	M	C	N	D	S	V	P	C	P	P	C	1	2	2
85	C	P	P	C	R	F	T	L	S	I	S	R	V	G	C	T	L	N	I	M	P	I	R	A	M	C	N	D	S	V	P	C	P	P	C	1	2	2
86	C	P	P	C	R	F	T	L	S	Q	R	R	S	V	C	E	T	Y	P	T	P	I	R	A	M	C	N	D	S	V	P	C	P	P	C	1	2	2
87	C	P	P	C	R	F	T	L	S	H	I	I	I	E	C	P	L	I	S	N	P	I	R	A	M	C	N	D	S	V	P	C	P	P	C	1	2	2
88	C	P	P	C	R	F	T	L	S	P	V	R	P	P	C	T	R	G	L	R	P	I	R	A	M	C	N	D	S	V	P	C	P	P	C	1	2	2
89	C	P	P	C	R	F	T	L	S	P	S	T	V	W	C	Q	N	M	L	L	P	I	R	A	M	C	N	D	S	V	P	C	P	P	C	1	2	2
90	C	P	P	C	R	F	T	L	S	P	N	V	L	I	C	N	T	S	H	V	P	I	R	A	M	C	N	D	S	V	P	C	P	P	C	1	2	2
91	C	P	P	C	R	F	T	L	S	P	R	P	P	R	C	R	V	S	M	E	P	I	R	A	M	C	N	D	S	V	P	C	P	P	C	1	2	2
92	C	P	P	C	R	F	T	L	S	P	P	L	R	N	C	L	T	F	K	W	P	I	R	A	M	C	N	D	S	V	P	C	P	P	C	1	2	2
93	C	P	P	C	R	F	T	L	S	P	P	R	A	P	C	V	V	N	F	T	P	I	R	A	M	C	N	D	S	V	P	C	P	P	C	1	2	2
94	C	P	P	C	R	F	T	L	S	L	P	V	T	N	C	P	P	Q	V	A	P	I	R	A	M	C	N	D	S	V	P	C	P	P	C	1	2	2
95	C	P	P	C	R	F	T	L	S	L	D	Q	S	G	C	M	M	T	S	F	P	I	R	A	M	C	N	D	S	V	P	C	P	P	C	1	2	2
96	C	P	P	C	R	F	T	L	S	E	I	L	P	L	C	R	R	*	A	R	P	I	R	A	M	C	N	D	S	V	P	C	P	P	C	1	2	2
97	C	P	P	C	R	F	T	L	S	E	I	S	Q	Y	C	Q	S	Y	N	N	P	I	R	A	M	C	N	D	S	V	P	C	P	P	C	1	2	2
98	C	P	P	C	R	F	T	L	S	D	K	V	L	A	C	G	N	D	R	W	P	I	R	A	M	C	N	D	S	V	P	C	P	P	C	1	2	2
99	C	P	P	C	R	F	T	L	S	D	P	N	Y	N	C	T	I	N	A	I	P	I	R	A	M	C	N	D	S	V	P	C	P	P	C	1	2	2
100	C	P	P	C	R	F	T	L	S	D	V	Q	V	Y	C	Y	I	I	D	E	P	I	R	A	M	C	N	D	S	V	P	C	P	P	C	1	2	2
101	C	P	P	C	R	F	T	L	S	D	V	L	Y	P	C	E	H	I	I	S	P	I	R	A	M	C	N	D	S	V	P	C	P	P	C	1	2	2
102	C	P	P	C	R	F	T	L	S	D	S	P	M	Q	C	L	W	V	F	V	P	I	R	A	M	C	N	D	S	V	P	C	P	P	C	1	2	2
103	C	P	P	C	R	F	T	L	S	A	I	G	R	R	C	I	H	T	G	P	P	I	R	A	M	C	N	D	S	V	P	C	P	P	C	1	2	2
104	C	P	P	C	R	F	T	L	S	A	H	W	A	F	C	G	R	A	E	I	P	I	R	A	M	C	N	D	S	V	P	C	P	P	C	1	2	2
105	C	P	P	C	R	F	T	L	S	A	N	G	G	L	C	E	F	L	L	P	P	I	R	A	M	C	N	D	S	V	P	C	P	P	C	1	2	2
106	C	P	P	C	R	F	T	L	S	A	D	V	T	L	C	F	I	V	V	L	P	I	R	A	M	C	N	D	S	V	P	C	P	P	C	1	2	2
107	C	P	P	C	R	F	T	L	S	V	V	N	V	S	C	T	H	A	L	Q	P	I	R	A	M	C	N	D	S	V	P	C	P	P	C	1	2	2
108	C	P	P	C	R	F	T	L	S	V	H	H	V	N	C	T	G	W	K	N	P	I	R	A	M	C	N	D	S	V	P	C	P	P	C	1	2	2
109	C	P	P	C	R	F	T	L	S	V	*	*	S	L	C	L	S	E	R	I	P	I	R	A	M	C	N	D	S	V	P	C	P	P	C	1	2	2
110	C	P	P	C	R	F	T	L	S	V	S	G	Q	N	C	S	I	L	Q	A	P	I	R	A	M	C	N	D	S	V	P	C	P	P	C	1	2	2
111	C	P	P	C	R	F	T	L	S	S	T	M	E	R	C	Y	L	L	V	F	P	I	R	A	M	C	N	D	S	V	P	C	P	P	C	1	2	2
112	C	P	P	C	R	F	T	L	S	S	S	N	I	L	C	N	S	S	V	M	P	I	R	A	M	C	N	D	S	V	P	C	P	P	C	1	2	2
113	C	P	P	C	R	F	T	L	S	S	M	P	P	E	C	S	G	T	S	Q	P	I	R	A	M	C	N	D	S	V	P	C	P	P	C	1	2	2
114	C	P	P	C	R	F	T	L	S	S	L	V	P	P	C	P	V	A	K	G	P	I	R	A	M	C	N	D	S	V	P	C	P	P	C	1	2	2
115	C	P	P	C	R	F	T	L	S	L	M	R	T	V	C	P	S	Y	V	S	P	I	R	A	M	C	N	D	S	V	P	C	P	P	C	1	2	2
116	C	P	P	C	R	F	N	L	S	I	E	R	R	W	C	G	S	R	S	L	P	I	R	A	M	C	N	Y	S	V	P	C	P	P	C	1	1	1
117	C	P	P	C	R	F	T	L	S	T	A	G	P	P	C	S	P	N	L	P	P	I	R	A	M	C	N	D	S	V	P	C	P	P	C	1	1	1
118	C	P	P	C	R	F	T	L	S	P	I	F	H	N	C	T	P	H	I	I	P	I	R	A	M	C	N	D	S	V	P	C	P	P	C	1	1	1
119	C	P	P	C	R	F	T	L	S	P	P	R	A	P	C	V	V	N	F	T	P	I	R	A	M	C	N	D	S	V	P	C	P	P	C	1	1	1
120	C	P	P	C	R	F	T	L	S	P	P	R	A	P	C	V	V	N	F	T	P	I	R	A	M	C	N	D	S	V	P	C	P	P	C	1	1	1
121	C	P	P	C	R	F	T	L	S	A	S	A	I	P	C	W	L	R	T	G	P	I	R	A	M	C	N	D	S	V	P	C	P	P	C	1	1	1
122	C	P	P	C	R	F	T	L	S	W	Y	Y	E	W	C	V	P	Y	Q	Q	P	I	R	A	M	C	N	D	S	V	P	C	P	P	C	1	1	1
123	C	P	P	C	R	F	T	L	S	Y	Y	S	T	I	C	N	Q	S	L	R	P	I	R	A	M	C	N	D	S	V	P	C	P	P	C	1	1	1
124	C	P	P	C	R	F	T	L	S	K	M	V	L	D	C	L	P	A	K	R	P	I	R	A	M	C	N	D	S	V	P	C	P	P	C	1	1	1
125	C	P	P	C	R	F	T	L	S	N	H	Y	R	W	C	L	T	M	H	L	P	I	R	A	M	C	N	D	S	V	P	C	P	P	C	1	1	1
126	C	P	P	C	R	F	T	L	S	N	R	S	L	K	C	G	A	F	S	S	P	I	R	A	M	C	N	D	S	V	P	C	P	P	C	1	1	1
127	C	P	P	C	R	F	T	L	S	N	L	S	L	P	C	L	V	T	A	V	P	I	R	A	M	C	N	D	P	V	P	C	P	P	C	1	1	1
128	C	P	P	C	R	F	T	L	S	N	L	S	L	P	C	L	V	T	A	V	P	I	R	A	M	C	N	D	Y	V	P	C	P	P	C	1	1	1
129	C	P	P	C	R	F	T	L	S	N	L	S	L	P	C	L	V	T	A	V	P	I	R	A	M	C	N	D	S	V	T	C	P	P	C	1	1	1
130	C	P	P	C	R	F	T	L	S	N	L	A	H	L	C	G	S	Q	I	W	P	I	R	A	M	C	N	D	S	V	P	C	P	P	C	1	1	1
131	C	P	P	C	R	F	T	L	S	N	L	Y	H	V	C	S	N	F	T	S	P	I	R	A	M	C	N	Y	S	V	P	C	P	P	C	1	1	1
132	C	P	P	C	R	F	T	L	S	N	D	S	I	F	C	S	D	M	V	L	P	I	R	A	M	C	N	D	S	V	P	C	P	P	C	1	1	1
133	C	P	P	C	R	F	T	L	S	N	A	T	A	L	C	E	D	F	S	H	P	I	R	A	M	C	N	D	S	V	P	C	P	P	C	1	1	1
134	C	P	P	C	R	F	T	L	S	N	V	L	M	V	C	W	K	I	D	S	P	T	R	A	M	C	N	D	S	V	P	C	P	P	C	1	1	1
135	C	P	P	C	R	F	T	L	S	T	S	S	P	P	C	A	L	A	S	S	P	I	R	A	M	C	N	D	S	V	P	C	P	P	C	1	1	1
136	C	P	P	C	R	F	T	L	S	T	M	G	R	N	C	S	W	P	T	S	P	I	R	A	M	C	N	D	S	V	P	C	P	P	C	1	1	1
137	C	P	P	C	R	F	T	L	S	T	D	R	I	A	C	G	P	M	N	V	P	I	R	A	M	C	N	D	S	V	P	C	P	P	C	1	1	1
138	C	P	P	C	R	F	T	L	S	T	E	*	E	S	C	P	P	S	P	S	P	I	R	A	M	C	N	D	S	V	P	C	P	P	C	1	1	1
139	C	P	P	C	R	F	T	L	S	T	D	R	I	A	C	G	P	M	N	V	P	I	R	A	M	C	N	D	S	A	P	C	P	P	C	1	1	1
140	C	P	P	C	R	F	T	L	S	T	D	R	I	A	C	G	P	M	N	V	P	I	R	A	M	C	N	D	S	V	P	C	P	P	C	1	1	1
141	C	P	P	C	R	F	T	L	S	T	D	R	I	A	C	G	P	M	N	V	P	I	R	A	M	C	N	D	S	V	P	C	P	P	C	1	1	1
142	C	P	P	C	R	F	T	L	S	T	D	R	I	A	C	G	P	I	N	V	P	I	R	A	M	C	N	D	S	V	P	C	P	P	C	1	1	1
143	C	P	P	C	R	F	T	L	S	T	A	P	A	P	C	T	S	S	P	S	P	I	R	A	M	C	N	D	S	V	P	C	P	P	C	1	1	1
144	C	P	P	C	R	F	T	L	S	T	T	L	E	P	C	R	I	R	V	I	P	I	R	A	M	C	N	D	S	V	P	C	P	P	C	1	1	1
145	C	P	P	C	R	F	T	L	S	T	T	L	E	P	C	R	I	R	V	I	P	I	R	A	M	C	N	D	S	V	P	C	P	P	C	1	1	1
146	C	P	P	C	R	F	T	L	S	T	T	W	Q	*	C	E	T	S	T	S	P	I	R	A	M	C	N	D	S	V	P	C	P	P	C	1	1	1
147	C	P	P	C	R	F	T	L	S	T	H	Y	V	R	C	L	L	A	E	*	P	I	R	A	M	C	N	D	S	V	P	C	P	P	C	1	1	1
148	C	P	P	C	R	F	T	L	S	T	L	V	G	N	C	S	D	Y	D	L	P	I	R	A	M	C	N	D	S	V	P	C	P	P	C	1	1	1
149	C	P	P	C	R	F	T	L	S	T	D	S	T	F	C	V	W	V	L	E	P	I	R	A	M	C	N	D	S	V	P	C	P	P	C	1	1	1
150	C	P	P	C	R	F	T	L	S	T	A	N	N	S	C	S	L	V	F	W	P	I	R	A	M	C	N	D	S	V	P	C	P	P	C	1	1	1
151	C	P	P	C	R	F	T	L	S	T	A	G	P	P	C	S	P	N	L	P	P	I	R	G	M	C	N	D	S	V	P	C	P	P	C	1	1	1
152	C	P	P	C	R	F	T	L	S	T	V	A	T	P	C	V	G	T	W	T	P	I	W	A	M	C	N	D	S	V	P	C	P	P	C	1	1	1
153	C	P	P	C	R	F	T	L	S	R	I	H	A	T	C	P	A	G	R	L	P	L	R	A	M	C	N	D	S	V	P	C	P	P	C	1	1	1
154	C	P	P	C	R	F	T	L	S	R	V	S	I	P	C	Q	P	Q	V	T	P	I	R	A	M	C	N	D	S	V	P	C	P	P	C	1	1	1
155	C	P	P	C	R	F	T	L	S	S	S	M	S	L	C	N	Y	S	V	W	P	I	R	A	M	C	N	D	S	V	P	C	P	P	C	1	1	1
156	C	P	P	C	R	F	T	L	S	S	E	A	P	P	C	A	E	L	S	P	P	I	R	A	M	C	N	D	S	V	P	C	P	P	C	1	1	1
157	C	P	P	C	R	F	T	L	S	M	D	T	R	P	C	G	I	L	L	K	P	I	R	A	M	C	N	D	S	V	P	C	P	P	C	1	1	1
158	C	P	P	C	R	F	T	L	S	I	S	W	G	V	C	M	V	T	F	R	P	I	R	A	M	C	N	D	S	V	P	C	P	P	C	1	1	1
159	C	P	P	C	R	F	T	L	S	I	L	V	D	H	C	D	E	L	Y	G	P	I	R	A	M	C	N	D	S	V	P	C	P	P	C	1	1	1
160	C	P	P	C	R	F	T	L	S	I	A	A	N	S	C	L	L	T	L	T	P	I	R	A	M	C	N	D	S	V	P	C	P	P	C	1	1	1
161	C	P	P	C	R	F	T	L	S	Q	R	A	S	P	C	T	P	L	A	V	P	I	R	A	M	C	N	V	S	V	P	C	P	P	C	1	1	1
162	C	P	P	C	R	F	T	L	S	Q	M	R	D	R	C	I	L	I	L	R	P	I	R	A	M	C	N	D	S	V	P	C	P	P	C	1	1	1
163	C	P	P	C	R	F	T	L	S	Q	I	S	V	T	C	G	K	I	R	H	P	I	R	A	M	C	N	D	S	V	P	C	P	P	C	1	1	1
164	C	P	P	C	R	F	T	L	S	Q	P	A	R	A	C	G	P	T	K	L	P	I	R	A	M	C	N	D	S	V	P	C	P	P	C	1	1	1
165	C	P	P	C	R	F	T	L	S	Q	P	A	R	A	C	G	P	T	K	L	P	I	R	A	M	C	N	D	S	V	P	C	P	P	C	1	1	1
166	C	P	P	C	R	F	T	L	S	Q	G	N	A	D	C	P	D	I	W	L	P	I	R	A	M	C	N	D	S	V	P	C	P	P	C	1	1	1
167	C	P	P	C	R	F	T	L	S	Q	G	L	L	F	C	A	L	E	I	M	P	I	R	A	M	C	N	D	S	V	P	C	P	P	C	1	1	1
168	C	P	P	C	R	F	T	L	S	H	P	P	N	T	C	Q	L	F	R	G	P	I	R	A	M	C	N	D	S	V	P	C	P	P	C	1	1	1
169	C	P	P	C	R	F	T	L	S	H	W	H	E	L	C	M	N	S	E	L	P	I	R	A	M	C	N	D	S	V	P	C	P	P	C	1	1	1
170	C	P	P	C	R	F	T	L	S	P	I	S	V	T	C	G	K	I	R	H	P	I	R	A	M	C	N	D	S	V	P	C	P	P	C	1	1	1
171	C	P	P	C	R	F	T	L	S	P	P	Q	V	G	C	A	K	G	N	S	P	I	R	A	M	C	N	Y	S	V	P	C	P	P	C	1	1	1
172	C	P	P	C	R	F	T	L	S	P	P	K	Y	P	C	S	V	P	I	Q	P	I	R	A	M	C	N	D	S	V	P	C	P	P	C	1	1	1
173	C	P	P	C	R	F	T	L	S	P	L	P	E	S	C	S	S	M	V	R	P	I	R	A	M	C	N	D	S	V	P	C	P	P	C	1	1	1
174	C	P	P	C	R	F	T	L	S	P	A	G	N	S	C	S	Y	Y	V	E	P	I	R	A	M	C	N	D	S	V	P	C	P	P	C	1	1	1
175	C	P	P	C	R	F	T	L	S	P	V	R	P	P	C	T	R	G	L	R	P	I	R	A	M	C	N	D	S	V	P	C	P	P	C	1	1	1
176	C	P	P	C	R	F	T	L	S	P	K	Q	D	P	C	T	N	S	D	Q	P	I	R	A	M	C	N	D	S	V	P	C	P	P	C	1	1	1
177	C	P	P	C	R	F	T	L	S	P	T	L	H	D	C	G	A	L	E	L	P	I	R	A	M	C	N	D	S	V	P	C	P	P	C	1	1	1
178	C	P	P	C	R	F	T	L	S	P	Q	A	P	P	C	Q	R	P	D	M	P	I	R	A	M	C	N	D	S	V	P	C	P	P	C	1	1	1
179	C	P	P	C	R	F	T	L	S	P	Q	A	P	P	C	Q	R	P	D	M	P	I	R	A	M	C	N	D	S	V	P	C	P	P	C	1	1	1
180	C	P	P	C	R	F	T	L	S	P	P	N	G	G	C	N	F	S	D	I	P	I	R	A	M	C	N	D	S	V	P	C	P	P	C	1	1	1
181	C	P	P	C	R	F	T	L	S	P	P	N	G	G	C	N	F	S	D	I	T	I	R	A	M	C	N	D	S	V	P	C	P	P	C	1	1	1
182	C	P	P	C	R	F	T	L	S	P	R	A	Y	F	C	P	K	V	F	P	P	I	R	A	M	C	N	D	S	V	P	C	P	P	C	1	1	1
183	C	P	P	C	R	F	T	L	S	P	A	S	R	P	C	T	Q	L	P	A	P	I	Q	A	M	C	N	D	S	V	P	C	P	P	C	1	1	1
184	C	P	P	C	R	F	T	L	S	P	A	Q	L	R	C	V	N	R	R	I	P	I	R	A	M	C	N	D	S	V	P	C	P	P	C	1	1	1
185	C	P	P	C	R	F	T	L	S	P	Y	Q	H	P	C	M	H	S	D	Q	P	I	R	A	M	C	N	D	S	V	P	C	P	P	C	1	1	1
186	C	P	P	C	R	F	T	L	S	R	T	T	P	N	C	L	E	R	S	K	P	I	R	A	M	C	N	D	S	V	P	C	P	P	C	1	1	1
187	C	P	P	C	R	F	T	L	S	R	S	S	G	P	C	A	D	S	A	S	P	I	R	A	M	C	N	D	S	V	P	C	P	P	C	1	1	1
188	C	P	P	C	R	F	T	L	S	R	S	L	P	P	C	E	N	R	S	L	P	I	R	A	M	C	N	D	S	V	P	C	P	P	C	1	1	1
189	C	P	P	C	R	F	T	L	S	R	M	M	V	M	C	S	D	R	N	*	P	I	R	A	M	C	N	D	S	V	P	C	P	P	C	1	1	1
190	C	P	P	C	R	F	T	L	S	R	I	S	Q	P	C	A	Y	Y	A	W	P	I	R	A	M	C	N	D	S	V	P	C	P	P	C	1	1	1
191	C	P	P	C	R	F	T	L	S	R	Q	N	T	M	C	Q	H	R	W	V	P	I	R	A	M	C	N	D	S	V	P	C	P	P	C	1	1	1
192	C	P	P	C	R	F	T	L	S	R	Q	V	I	W	C	G	V	S	P	L	P	I	R	A	M	C	N	V	S	V	P	C	P	P	C	1	1	1
193	C	P	P	C	R	F	T	L	S	R	N	P	S	P	C	P	L	V	L	L	P	I	R	A	M	C	N	D	S	V	P	C	P	P	C	1	1	1
194	C	P	P	C	R	F	T	L	S	R	M	A	M	N	C	S	V	R	S	G	P	I	R	A	M	C	N	D	S	V	P	C	P	P	C	1	1	1
195	C	P	P	C	R	F	T	L	S	L	T	D	L	S	C	G	A	Y	T	L	P	I	L	A	M	C	N	D	S	V	P	C	P	P	C	1	1	1
196	C	P	P	C	R	F	T	L	S	L	T	S	T	K	C	P	E	L	S	L	P	I	R	A	M	C	N	D	S	V	P	C	P	P	C	1	1	1
197	C	P	P	C	R	F	T	L	S	L	A	L	M	R	C	T	P	K	G	A	P	I	R	A	M	C	N	D	S	V	P	C	P	P	C	1	1	1
198	C	P	P	C	R	F	T	L	S	L	L	R	V	P	C	W	V	Y	H	D	P	I	R	A	M	C	N	D	S	V	P	C	P	P	C	1	1	1
199	C	P	P	C	R	F	T	L	S	L	H	L	H	F	C	P	I	R	H	Q	P	I	R	A	M	C	N	D	S	V	P	C	P	P	C	1	1	1
200	C	P	P	C	R	F	T	L	S	L	P	V	T	N	C	P	P	Q	V	A	P	I	R	A	M	C	N	D	S	V	P	C	P	P	C	1	1	1
201	C	P	P	C	R	F	T	L	S	L	P	V	T	N	C	P	P	Q	V	A	P	L	R	A	M	C	N	D	S	V	P	C	P	P	C	1	1	1
202	C	P	P	C	R	F	T	L	S	L	R	N	S	V	C	L	W	V	R	M	P	I	R	A	M	C	N	D	S	V	P	C	P	P	C	1	1	1
203	C	P	P	C	R	F	T	L	S	D	I	S	K	G	C	S	D	F	W	F	P	I	R	A	M	C	N	D	S	V	P	C	P	P	C	1	1	1
204	C	P	P	C	R	F	T	L	S	E	I	V	K	R	C	N	T	V	L	Q	P	I	R	A	M	C	N	D	S	V	P	C	P	P	C	1	1	1
205	C	P	P	C	R	F	T	L	S	E	I	Y	T	I	C	R	R	E	I	A	P	I	R	A	M	C	N	D	S	V	P	C	P	P	C	1	1	1
206	C	P	P	C	R	F	T	L	S	E	P	P	S	P	C	L	S	I	A	N	P	I	R	A	M	C	N	D	S	V	P	C	P	P	C	1	1	1
207	C	P	P	C	R	F	T	L	S	E	P	A	R	P	C	H	L	V	R	G	P	I	R	A	M	C	N	D	S	V	P	C	P	P	C	1	1	1
208	C	P	P	C	R	F	T	L	S	E	A	R	A	L	C	G	D	R	R	V	P	I	R	A	M	C	N	D	S	V	P	C	P	P	C	1	1	1
209	C	P	P	C	R	F	T	L	S	D	S	S	M	N	C	S	T	K	T	K	P	I	R	A	M	C	N	D	S	V	P	C	P	P	C	1	1	1
210	C	P	P	C	R	F	T	L	S	D	I	G	R	V	C	E	A	L	T	S	P	I	R	A	M	C	N	D	S	V	P	C	P	P	C	1	1	1
211	C	P	P	C	R	F	T	L	S	D	P	G	A	T	C	Y	V	Y	V	L	P	I	R	A	M	C	N	D	S	V	P	C	P	P	C	1	1	1
212	C	P	P	C	R	F	T	L	S	D	A	R	N	M	C	R	V	T	I	E	P	I	R	A	M	C	N	D	S	V	P	C	P	P	C	1	1	1
213	C	P	P	C	R	F	T	L	S	D	Y	K	R	I	C	W	D	Y	H	W	P	I	R	A	M	C	N	D	S	V	P	C	P	P	C	1	1	1
214	C	P	P	C	R	F	T	L	S	A	L	L	R	S	C	D	L	R	D	L	P	I	R	A	M	C	N	D	S	V	P	C	P	P	C	1	1	1
215	C	P	P	C	R	F	T	L	S	A	G	H	L	L	C	G	D	D	S	M	P	I	R	A	M	C	N	D	S	V	P	C	P	P	C	1	1	1
216	C	P	P	C	R	F	T	L	S	A	T	P	R	P	C	V	L	L	D	L	P	I	R	A	M	C	N	D	S	V	P	C	P	P	C	1	1	1
217	C	P	P	C	R	F	T	L	S	A	P	P	S	L	C	R	A	V	R	R	P	I	R	A	M	C	N	D	S	V	P	C	P	P	C	1	1	1
218	C	P	P	C	R	F	T	L	S	A	P	S	E	P	C	S	F	E	S	L	T	I	R	A	M	C	N	D	S	V	P	C	P	P	C	1	1	1
219	C	P	P	C	R	F	T	L	S	A	R	S	H	E	C	L	D	R	G	E	P	I	R	A	M	C	N	D	S	V	P	C	P	P	C	1	1	1
220	C	P	P	C	R	F	T	L	S	A	D	V	T	L	C	F	I	V	V	L	P	I	R	A	M	C	N	D	S	V	P	C	P	P	C	1	1	1
221	C	P	P	C	R	F	T	L	S	A	S	A	I	T	C	W	L	R	T	G	P	I	R	A	M	C	N	D	S	V	P	C	P	P	C	1	1	1
222	C	P	P	C	R	F	T	L	S	A	S	A	I	P	C	W	L	R	T	G	P	I	R	A	M	C	N	D	S	V	P	C	P	P	C	1	1	1
223	C	P	P	C	R	F	T	L	S	G	P	G	F	P	C	T	E	L	Y	N	T	I	R	A	M	C	N	D	S	V	P	C	P	P	C	1	1	1
224	C	P	P	C	R	F	T	L	S	G	R	M	E	P	C	G	E	T	D	S	P	I	R	A	M	C	N	D	S	V	P	C	P	P	C	1	1	1
225	C	P	P	C	R	F	T	L	S	G	L	S	L	H	C	G	D	A	Q	M	P	I	R	A	M	C	N	E	S	V	P	C	P	P	C	1	1	1
226	C	P	P	C	R	F	T	L	S	G	W	N	K	S	C	A	G	I	G	E	P	I	R	A	M	C	N	D	S	V	P	C	P	P	C	1	1	1
227	C	P	P	C	R	F	T	L	S	G	P	R	P	P	C	L	S	S	L	T	P	I	R	A	M	C	N	D	S	V	P	C	P	P	C	1	1	1
228	C	P	P	C	R	F	T	L	S	G	R	L	T	P	C	P	R	V	F	R	P	I	R	A	M	C	N	D	S	V	P	C	P	P	C	1	1	1
229	C	P	P	C	R	F	T	L	S	G	V	E	W	T	C	R	P	K	S	L	P	I	R	A	M	C	N	D	S	V	P	C	P	P	C	1	1	1
230	C	P	P	C	R	F	T	L	S	V	T	P	L	P	C	T	P	A	P	P	P	I	R	A	M	C	N	D	S	V	P	C	P	P	C	1	1	1
231	C	P	P	C	R	F	T	L	S	V	T	P	L	P	C	T	P	A	P	P	P	I	R	A	M	C	N	V	S	V	P	C	P	P	C	1	1	1
232	C	P	P	C	R	F	T	L	S	V	L	G	V	P	C	N	M	P	S	Q	P	I	R	A	M	C	N	D	S	V	P	C	P	P	C	1	1	1
233	C	P	P	C	R	F	T	L	S	V	I	H	G	V	C	Y	V	Y	V	A	P	I	R	A	M	C	N	D	S	V	P	C	P	P	C	1	1	1
234	C	P	P	C	R	F	T	L	S	V	G	G	S	D	C	Y	L	L	V	E	P	I	R	A	M	C	N	D	S	V	P	C	P	P	C	1	1	1
235	C	P	P	C	R	F	T	L	S	V	S	G	Q	N	C	S	I	L	Q	A	P	I	R	G	M	C	N	D	S	V	P	C	P	P	C	1	1	1
236	C	P	P	C	R	F	T	L	S	Y	T	V	G	L	C	A	I	F	D	L	P	I	R	A	M	C	N	D	S	V	P	C	P	P	C	1	1	1
237	C	P	P	C	R	F	T	L	S	Y	S	S	M	N	C	S	T	K	T	K	P	I	R	A	M	C	N	D	S	V	P	C	P	P	C	1	1	1
238	C	P	P	C	R	F	T	L	S	Y	I	P	T	S	C	Q	F	L	I	Q	P	I	R	A	M	C	N	D	S	V	P	C	P	P	C	1	1	1
239	C	P	P	C	R	F	T	L	S	Y	Q	Y	I	N	C	V	V	F	N	W	P	I	R	A	M	C	N	D	S	V	P	C	P	P	C	1	1	1
240	C	P	P	C	R	F	T	L	S	Y	R	P	G	S	C	T	Y	E	L	K	P	I	R	A	M	C	N	D	S	V	P	C	P	P	C	1	1	1
241	C	P	P	C	R	F	T	L	S	Y	L	N	S	S	C	D	F	F	F	V	P	I	R	A	M	C	N	D	S	V	P	C	P	P	C	1	1	1
242	C	P	P	C	R	F	T	L	S	Y	V	E	L	N	C	S	T	H	Y	M	P	I	R	A	M	C	N	D	S	V	P	C	P	P	C	1	1	1
243	C	P	P	C	R	F	T	L	S	S	Q	A	A	N	C	S	S	R	I	K	P	I	R	A	M	C	N	D	S	V	P	C	P	P	C	1	1	1
244	C	P	P	C	R	F	T	L	S	S	L	T	S	I	C	Q	V	M	P	L	P	I	R	A	M	C	N	D	S	V	P	C	P	P	C	1	1	1
245	C	P	P	C	R	F	T	L	S	S	L	I	M	R	C	G	G	D	V	V	P	I	R	A	M	C	N	D	S	V	P	C	P	P	C	1	1	1
246	C	P	P	C	R	F	T	L	S	S	L	R	R	A	C	E	L	E	R	S	P	I	R	A	M	C	N	D	S	V	P	C	P	P	C	1	1	1
247	C	P	P	C	R	F	T	L	S	S	E	N	R	P	C	R	L	N	G	G	P	I	R	A	M	C	N	D	S	V	P	C	P	P	C	1	1	1
248	C	P	P	C	R	F	T	L	S	S	D	M	I	R	C	R	I	H	Q	R	P	I	R	A	M	C	N	D	S	V	P	C	P	P	C	1	1	1
249	C	P	P	C	R	F	T	L	S	S	T	D	T	N	C	E	G	S	D	V	P	I	R	A	M	C	N	D	S	V	P	C	P	P	C	1	1	1
250	C	P	P	C	R	F	T	L	S	L	S	R	R	A	C	L	D	K	G	L	P	I	R	T	M	C	N	D	S	V	P	C	P	P	C	1	1	1
251	C	P	P	C	R	F	T	L	S	L	D	S	E	P	C	L	I	A	V	W	P	I	R	A	M	C	N	D	S	V	P	C	P	P	C	1	1	1
252	C	P	P	C	R	F	T	L	S	L	S	Q	R	L	C	N	W	S	S	I	P	I	R	A	M	C	N	D	S	V	P	C	P	P	C	1	1	1
253	C	P	P	C	R	F	T	L	S	L	F	G	Q	S	C	M	P	I	A	A	P	I	R	A	M	C	N	D	S	V	P	C	P	P	C	1	1	1
254	C	P	P	C	R	F	T	L	S	F	E	S	L	F	C	A	I	V	R	I	P	I	R	A	M	C	N	D	S	V	P	C	P	P	C	1	1	1
255	C	P	P	C	R	F	T	L	S	F	A	L	S	N	C	M	R	R	M	D	P	I	R	A	M	C	N	D	S	V	P	C	P	P	C	1	1	1
256	C	P	P	C	R	F	T	V	S	I	A	A	N	S	C	L	L	T	L	T	P	I	R	A	M	C	N	D	S	V	P	C	P	P	C	1	1	1

## Sheet: Library-2 S2-P9
Number	Sequences																																			Abundance
																																				Input	P9	Normalization
1	C	P	P	C	D	L	L	K	L	W	A	H	Q	Y	C	A	S	S	G	I	T	S	I	I	T	C	Y	S	N	H	T	C	P	P	C	1	4881	4881
2	C	P	P	C	D	L	L	K	L	W	V	S	F	P	C	S	Y	H	L	D	T	S	I	I	T	C	Y	S	N	H	T	C	P	P	C	1	3214	3214
3	C	P	P	C	D	L	L	K	L	V	K	H	L	A	C	E	G	W	P	T	T	S	I	I	T	C	Y	S	N	H	T	C	P	P	C	1	3118	3118
4	C	P	P	C	D	L	L	K	L	T	Y	S	P	R	C	L	A	V	W	L	T	S	I	I	T	C	Y	S	N	H	T	C	P	P	C	1	3022	3022
5	C	P	P	C	D	L	L	K	L	L	I	S	I	H	C	S	T	P	P	P	T	S	I	I	T	C	Y	S	N	H	T	C	P	P	C	1	2013	2013
6	C	P	P	C	D	L	L	K	L	G	I	M	F	K	C	V	Q	L	P	S	T	S	I	I	T	C	Y	S	N	H	T	C	P	P	C	1	1998	1998
7	C	P	P	C	D	L	L	K	L	A	E	L	L	G	C	S	H	M	A	N	T	S	I	I	T	C	Y	S	N	H	T	C	P	P	C	1	1663	1663
8	C	P	P	C	D	L	L	K	L	L	L	Q	T	H	C	E	L	R	G	P	T	S	I	I	T	C	Y	S	N	H	T	C	P	P	C	1	1066	1066
9	C	P	P	C	D	L	L	K	L	L	P	T	K	L	C	N	R	G	H	E	T	S	I	I	T	C	Y	S	N	H	T	C	P	P	C	1	976	976
10	C	P	P	C	D	L	L	K	L	F	N	T	S	N	C	G	D	I	N	I	T	S	I	I	T	C	Y	S	N	H	T	C	P	P	C	1	913	913
11	C	P	P	C	D	L	L	K	L	L	A	H	P	P	C	Y	R	D	W	N	T	S	I	I	T	C	Y	S	N	H	T	C	P	P	C	1	749	749
12	C	P	P	C	D	L	L	K	L	L	N	I	W	H	C	N	R	E	L	Y	T	S	I	I	T	C	Y	S	N	H	T	C	P	P	C	1	594	594
13	C	P	P	C	D	L	L	K	L	T	G	V	A	D	C	R	Q	F	P	*	T	S	I	I	T	C	Y	S	N	H	T	C	P	P	C	1	382	382
14	C	P	P	C	D	L	L	K	L	L	Y	N	S	F	C	P	P	P	P	A	T	S	I	I	T	C	Y	S	N	H	T	C	P	P	C	1	370	370
15	C	P	P	C	D	L	L	K	L	I	G	P	S	P	C	N	D	S	E	L	T	S	I	I	T	C	Y	S	N	H	T	C	P	P	C	1	345	345
16	C	P	P	C	D	L	L	K	L	H	L	P	L	T	C	L	T	S	P	P	T	S	I	I	T	C	Y	S	N	H	T	C	P	P	C	1	324	324
17	C	P	P	C	D	L	L	K	L	A	W	N	A	A	C	P	D	G	L	L	T	S	I	I	T	C	Y	S	N	H	T	C	P	P	C	1	264	264
18	C	P	P	C	D	L	L	K	L	Y	W	P	T	P	C	V	E	G	T	S	T	S	I	I	T	C	Y	S	N	H	T	C	P	P	C	1	197	197
19	C	P	P	C	D	L	L	K	L	R	P	E	A	T	C	L	Q	R	W	L	T	S	I	I	T	C	Y	S	N	H	T	C	P	P	C	1	181	181
20	C	P	P	C	D	L	L	K	L	L	R	G	T	T	C	L	P	T	S	P	T	S	I	I	T	C	Y	S	N	H	T	C	P	P	C	1	177	177
21	C	P	P	C	D	L	L	K	L	A	L	V	L	L	C	T	P	E	M	P	T	S	I	I	T	C	Y	S	N	H	T	C	P	P	C	1	177	177
22	C	P	P	C	D	L	L	K	L	K	V	E	L	L	C	T	G	P	T	L	T	S	I	I	T	C	Y	S	N	H	T	C	P	P	C	1	174	174
23	C	P	P	C	D	L	L	K	L	M	A	N	S	S	C	E	I	H	F	H	T	S	I	I	T	C	Y	S	N	H	T	C	P	P	C	1	151	151
24	C	P	P	C	D	L	L	K	L	L	A	P	K	P	C	A	P	G	A	S	T	S	I	I	T	C	Y	S	N	H	T	C	P	P	C	1	150	150
25	C	P	P	C	D	L	L	K	L	M	G	E	T	R	C	Q	P	L	E	L	T	S	I	I	T	C	Y	S	N	H	T	C	P	P	C	1	134	134
26	C	P	P	C	D	L	L	K	L	L	H	L	L	V	C	E	P	P	S	A	T	S	I	I	T	C	Y	S	N	H	T	C	P	P	C	1	121	121
27	C	P	P	C	D	L	L	K	L	Q	K	R	V	E	C	L	S	N	A	T	T	S	I	I	T	C	Y	S	N	H	T	C	P	P	C	1	120	120
28	C	P	P	C	D	L	L	K	L	L	R	G	S	P	C	S	H	P	G	D	T	S	I	I	T	C	Y	S	N	H	T	C	P	P	C	1	114	114
29	C	P	P	C	D	L	L	K	L	S	F	R	H	V	C	Q	D	S	Y	V	T	S	I	I	T	C	Y	S	N	H	T	C	P	P	C	1	111	111
30	C	P	P	C	D	L	L	K	L	S	V	R	W	Y	C	K	S	E	E	L	T	S	I	I	T	C	Y	S	N	H	T	C	P	P	C	1	110	110
31	C	P	P	C	D	L	L	K	L	L	V	L	V	L	C	G	A	L	A	P	T	S	I	I	T	C	Y	S	N	H	T	C	P	P	C	1	102	102
32	C	P	P	C	D	L	L	K	L	A	V	T	G	G	C	D	R	G	I	V	T	S	I	I	T	C	Y	S	N	H	T	C	P	P	C	1	97	97
33	C	P	P	C	D	L	L	K	L	A	V	T	I	D	C	L	P	L	N	Y	T	S	I	I	T	C	Y	S	N	H	T	C	P	P	C	1	84	84
34	C	P	P	C	D	L	L	K	L	S	T	S	L	R	C	Q	W	W	P	G	T	S	I	I	T	C	Y	S	N	H	T	C	P	P	C	1	78	78
35	C	P	P	C	D	L	L	K	L	V	S	A	G	R	C	P	Y	P	T	P	T	S	I	I	T	C	Y	S	N	H	T	C	P	P	C	1	73	73
36	C	P	P	C	D	L	L	K	L	R	F	I	M	Y	C	D	S	R	M	T	T	S	I	I	T	C	Y	S	N	H	T	C	P	P	C	2	123	61.5
37	C	P	P	C	D	L	L	K	L	D	G	L	V	N	C	T	S	D	N	A	T	S	I	I	T	C	Y	S	N	H	T	C	P	P	C	1	59	59
38	C	P	P	C	D	L	L	K	L	G	N	W	Y	V	C	L	E	Q	P	D	T	S	I	I	T	C	Y	S	N	H	T	C	P	P	C	1	59	59
39	C	P	P	C	D	L	L	K	L	R	P	Y	Y	F	C	Y	R	I	T	D	T	S	I	I	T	C	Y	S	N	H	T	C	P	P	C	1	58	58
40	C	P	P	C	D	L	L	K	L	L	K	I	V	P	C	D	T	Q	S	R	T	S	I	I	T	C	Y	S	N	H	T	C	P	P	C	1	53	53
41	C	P	P	C	D	L	L	K	L	Y	I	D	N	S	C	S	I	E	W	D	T	S	I	I	T	C	Y	S	N	H	T	C	P	P	C	1	52	52
42	C	P	P	C	D	L	L	K	L	P	A	N	T	T	C	R	V	P	N	A	T	S	I	I	T	C	Y	S	N	H	T	C	P	P	C	1	50	50
43	C	P	P	C	D	L	L	K	L	R	L	Y	V	A	C	F	G	V	S	T	T	S	I	I	T	C	Y	S	N	H	T	C	P	P	C	1	46	46
44	C	P	P	C	D	L	L	K	L	L	P	E	R	R	C	S	E	D	V	A	T	S	I	I	T	C	Y	S	N	H	T	C	P	P	C	1	46	46
45	C	P	P	C	D	L	L	K	L	H	N	Y	K	E	C	F	Q	Q	A	I	T	S	I	I	T	C	Y	S	N	H	T	C	P	P	C	1	44	44
46	C	P	P	C	D	L	L	K	L	E	T	I	L	V	C	K	R	S	A	D	T	S	I	I	T	C	Y	S	N	H	T	C	P	P	C	1	41	41
47	C	P	P	C	D	L	L	K	L	K	L	P	A	R	C	L	A	E	I	N	I	S	I	I	T	C	Y	S	N	H	T	C	P	P	C	1	36	36
48	C	P	P	C	D	L	L	K	L	T	R	R	N	A	C	P	R	P	T	P	T	S	I	I	T	C	Y	S	N	H	T	C	P	P	C	1	35	35
49	C	P	P	C	D	L	L	K	L	W	F	E	Q	F	C	S	T	P	A	R	T	S	I	I	T	C	Y	S	N	H	T	C	P	P	C	1	34	34
50	C	P	P	C	D	L	L	K	L	L	V	T	P	S	C	I	N	S	M	K	T	S	I	I	T	C	Y	S	N	H	T	C	P	P	C	1	33	33
51	C	P	P	C	D	L	L	K	L	S	P	L	E	N	C	S	A	G	T	P	T	S	I	I	T	C	Y	S	N	H	T	C	P	P	C	1	32	32
52	C	P	P	C	D	L	L	K	L	H	I	P	A	W	C	E	A	R	I	L	T	S	I	I	T	C	Y	S	N	H	T	C	P	P	C	1	32	32
53	C	P	P	C	D	L	L	K	L	G	A	M	H	E	C	P	R	L	M	K	T	S	I	I	T	C	Y	S	N	H	T	C	P	P	C	1	32	32
54	C	P	P	C	D	L	L	K	L	L	N	E	T	R	C	L	H	R	E	L	T	S	I	I	T	C	Y	S	N	H	T	C	P	P	C	1	30	30
55	C	P	P	C	D	L	L	K	L	T	N	T	T	K	C	Q	H	K	L	N	T	S	I	I	T	C	Y	S	N	H	T	C	P	P	C	1	29	29
56	C	P	P	C	D	L	L	K	L	D	V	M	T	Y	C	K	E	W	I	H	T	S	I	I	T	C	Y	S	N	H	T	C	P	P	C	1	29	29
57	C	P	P	C	D	L	L	K	L	H	I	R	V	M	C	S	K	E	G	E	T	S	I	I	T	C	Y	S	N	H	T	C	P	P	C	1	27	27
58	C	P	P	C	D	L	L	K	L	N	S	Y	E	N	C	L	E	D	H	N	T	S	I	I	T	C	Y	S	N	H	T	C	P	P	C	1	26	26
59	C	P	P	C	D	L	L	K	L	L	P	S	Y	N	C	T	L	E	T	N	T	S	I	I	T	C	Y	S	N	H	T	C	P	P	C	1	25	25
60	C	P	P	C	D	L	L	K	L	L	Y	N	S	F	C	P	P	P	P	A	P	S	I	I	T	C	Y	S	N	H	T	C	P	P	C	1	25	25
61	C	P	P	C	D	L	L	K	L	Q	R	N	W	K	C	V	I	V	G	P	T	S	I	I	T	C	Y	S	N	H	T	C	P	P	C	1	24	24
62	C	P	P	C	D	L	L	K	L	Y	V	E	N	Y	C	W	W	E	K	G	T	S	I	I	T	C	Y	S	N	H	T	C	P	P	C	1	24	24
63	C	P	P	C	D	L	L	K	L	I	M	K	K	M	C	N	S	E	D	H	T	S	I	I	T	C	Y	S	N	H	T	C	P	P	C	1	21	21
64	C	P	P	C	D	L	L	K	L	E	R	N	F	E	C	Q	H	I	L	N	T	S	I	I	T	C	Y	S	N	H	T	C	P	P	C	1	21	21
65	C	P	P	C	D	L	L	K	L	V	H	A	K	W	C	S	T	P	Q	L	T	S	I	I	T	C	Y	S	N	H	T	C	P	P	C	1	21	21
66	C	P	P	C	D	L	L	K	L	K	T	K	F	R	C	G	S	P	S	T	T	S	I	I	T	C	Y	S	N	H	T	C	P	P	C	1	20	20
67	C	P	P	C	D	L	L	K	L	G	Q	D	N	P	C	S	P	Q	P	P	T	S	I	I	T	C	Y	S	N	H	T	C	P	P	C	1	20	20
68	C	P	P	C	D	L	L	K	L	L	A	H	P	P	C	Y	R	D	W	T	T	S	I	I	T	C	Y	S	N	H	T	C	P	P	C	1	18	18
69	C	P	P	C	D	L	L	K	L	P	V	Q	G	S	C	G	T	H	D	K	T	S	I	I	T	C	Y	S	N	H	T	C	P	P	C	1	17	17
70	C	P	P	C	D	L	L	K	L	D	M	E	R	L	C	R	N	S	S	T	T	S	I	I	T	C	Y	S	N	H	T	C	P	P	C	1	17	17
71	C	P	P	C	D	L	L	K	L	N	I	L	V	P	C	R	E	T	A	L	T	S	I	I	T	C	Y	S	N	H	T	C	P	P	C	1	16	16
72	C	P	P	C	D	L	L	K	L	S	L	A	L	W	C	R	E	S	Q	L	T	S	I	I	T	C	Y	S	N	H	T	C	P	P	C	1	16	16
73	C	P	P	C	D	L	L	K	L	L	S	E	T	G	C	I	Y	E	E	K	T	S	I	I	T	C	Y	S	N	H	T	C	P	P	C	1	16	16
74	C	P	P	C	D	L	L	K	L	T	E	G	T	P	C	S	H	W	N	L	T	S	I	I	T	C	Y	S	N	H	T	C	P	P	C	1	14	14
75	C	P	P	C	D	L	L	K	L	Q	I	W	T	A	C	Q	L	P	F	D	T	S	I	I	T	C	Y	S	N	H	T	C	P	P	C	1	14	14
76	C	P	P	C	D	L	L	K	L	L	Y	G	R	L	C	R	L	A	P	D	T	S	I	I	T	C	Y	S	N	H	T	C	P	P	C	1	14	14
77	C	P	P	C	D	L	L	K	L	G	L	G	D	A	C	T	I	P	G	L	T	S	I	I	T	C	Y	S	N	H	T	C	P	P	C	1	14	14
78	C	P	P	C	D	L	L	K	L	V	M	V	A	F	C	P	P	G	E	D	T	S	I	I	T	C	Y	S	N	H	T	C	P	P	C	1	14	14
79	C	P	P	C	D	L	L	K	L	L	S	W	F	R	C	L	A	D	A	R	T	S	I	I	T	C	Y	S	N	H	T	C	P	P	C	1	14	14
80	C	P	P	C	D	L	L	K	L	M	H	S	F	L	C	T	T	R	P	P	T	S	I	I	T	C	Y	S	N	H	T	C	P	P	C	1	13	13
81	C	P	P	C	D	L	L	K	L	I	V	R	G	I	C	E	E	E	W	R	T	S	I	I	T	C	Y	S	N	H	T	C	P	P	C	1	13	13
82	C	P	P	C	D	L	L	K	L	R	R	R	T	E	C	R	H	P	S	P	T	S	I	I	T	C	Y	S	N	H	T	C	P	P	C	1	12	12
83	C	P	P	C	D	L	L	K	L	S	V	P	E	Q	C	V	F	P	R	G	T	S	I	I	T	C	Y	S	N	H	T	C	P	P	C	1	12	12
84	C	P	P	C	D	L	L	K	L	Q	T	S	D	P	C	A	A	I	L	P	T	S	I	I	T	C	Y	S	N	H	T	C	P	P	C	1	12	12
85	C	P	P	C	D	L	L	K	L	L	H	L	R	N	C	T	L	T	G	W	T	S	I	I	T	C	Y	S	N	H	T	C	P	P	C	1	12	12
86	C	P	P	C	D	L	L	K	L	N	V	V	E	W	C	W	T	S	H	R	T	S	I	I	T	C	Y	S	N	H	T	C	P	P	C	1	11	11
87	C	P	P	C	D	L	L	K	L	T	E	H	G	P	C	W	H	T	V	L	T	S	I	I	T	C	Y	S	N	H	T	C	P	P	C	1	11	11
88	C	P	P	C	D	L	L	K	L	S	D	R	T	K	C	D	S	S	I	L	T	S	I	I	T	C	Y	S	N	H	T	C	P	P	C	1	11	11
89	C	P	P	C	D	L	L	K	L	M	Q	H	L	P	C	I	G	V	T	E	T	S	I	I	T	C	Y	S	N	H	T	C	P	P	C	1	11	11
90	C	P	P	C	D	L	L	K	L	R	M	Q	R	L	C	Q	E	Q	F	R	T	S	I	I	T	C	Y	S	N	H	T	C	P	P	C	1	11	11
91	C	P	P	C	D	L	L	K	L	G	S	Q	Q	P	C	L	W	R	L	W	T	S	I	I	T	C	Y	S	N	H	T	C	P	P	C	1	11	11
92	C	P	P	C	D	L	L	K	L	S	T	S	L	R	C	Q	W	W	P	G	P	S	I	I	T	C	Y	S	N	H	T	C	P	P	C	1	11	11
93	C	P	P	C	D	L	L	K	L	V	A	L	H	I	C	G	Q	L	H	N	T	S	I	I	T	C	Y	S	N	H	T	C	P	P	C	2	20	10
94	C	P	P	C	D	L	L	K	L	S	V	R	G	M	C	L	H	M	V	H	T	S	I	I	T	C	Y	S	N	H	T	C	P	P	C	1	10	10
95	C	P	P	C	D	L	L	K	L	W	V	Q	D	Y	C	F	G	E	H	L	T	S	I	I	T	C	Y	S	N	H	T	C	P	P	C	1	10	10
96	C	P	P	C	D	L	L	K	L	L	K	I	V	P	C	D	T	Q	S	R	P	S	I	I	T	C	Y	S	N	H	T	C	P	P	C	1	10	10
97	C	P	P	C	D	L	L	K	L	K	N	N	M	N	C	N	I	N	N	R	T	S	I	I	T	C	Y	S	N	H	T	C	P	P	C	1	9	9
98	C	P	P	C	D	L	L	K	L	N	A	S	Y	G	C	I	E	N	L	E	T	S	I	I	T	C	Y	S	N	H	T	C	P	P	C	1	9	9
99	C	P	P	C	D	L	L	K	L	T	W	K	I	G	C	P	V	G	G	L	T	S	I	I	T	C	Y	S	N	H	T	C	P	P	C	1	9	9
100	C	P	P	C	D	L	L	K	L	H	V	I	D	A	C	R	A	R	H	S	T	S	I	I	T	C	Y	S	N	H	T	C	P	P	C	1	9	9
101	C	P	P	C	D	L	L	K	L	L	A	H	P	P	C	Y	R	D	W	N	P	S	I	I	T	C	Y	S	N	H	T	C	P	P	C	1	9	9
102	C	P	P	C	D	L	L	K	L	V	K	Q	W	G	C	T	D	I	V	M	T	S	I	I	T	C	Y	S	N	H	T	C	P	P	C	1	9	9
103	C	P	P	C	D	L	L	K	L	Y	V	V	Q	R	C	S	P	G	R	L	T	S	I	I	T	C	Y	S	N	H	T	C	P	P	C	1	9	9
104	C	P	P	C	D	L	L	K	L	L	N	I	W	H	C	N	R	E	L	Y	P	S	I	I	T	C	Y	S	N	H	T	C	P	P	C	1	9	9
105	C	P	P	C	D	L	L	K	L	P	T	R	E	E	C	M	R	V	W	R	T	S	I	I	T	C	Y	S	N	H	T	C	P	P	C	1	8	8
106	C	P	P	C	D	L	L	K	L	R	A	H	L	R	C	P	S	P	S	S	T	S	I	I	T	C	Y	S	N	H	T	C	P	P	C	1	8	8
107	C	P	P	C	D	L	L	K	L	L	P	T	K	L	C	N	R	G	H	E	S	S	I	I	T	C	Y	S	N	H	T	C	P	P	C	1	8	8
108	C	P	P	C	D	L	L	K	L	E	L	K	T	S	C	G	E	K	N	P	T	S	I	I	T	C	Y	S	N	H	T	C	P	P	C	1	8	8
109	C	P	P	C	D	L	L	K	L	A	F	S	R	P	C	Q	D	T	V	M	T	S	I	I	T	C	Y	S	N	H	T	C	P	P	C	1	8	8
110	C	P	P	C	D	L	L	K	L	S	I	P	F	L	C	D	H	P	P	V	T	S	I	I	T	C	Y	S	N	H	T	C	P	P	C	1	8	8
111	C	P	P	C	D	L	L	K	L	L	R	F	M	P	C	T	E	R	P	N	T	S	I	I	T	C	Y	S	N	H	T	C	P	P	C	1	8	8
112	C	P	P	C	D	L	L	K	L	L	L	Q	T	H	C	E	L	R	G	P	P	S	I	I	T	C	Y	S	N	H	T	C	P	P	C	1	8	8
113	C	P	P	C	D	L	L	K	L	M	D	M	A	G	C	S	E	S	Q	K	T	S	I	I	T	C	Y	S	N	H	T	C	P	P	C	1	7	7
114	C	P	P	C	D	L	L	K	L	M	F	F	R	S	C	G	A	N	T	R	T	S	I	I	T	C	Y	S	N	H	T	C	P	P	C	1	7	7
115	C	P	P	C	D	L	L	K	L	R	I	K	G	V	C	T	G	*	E	L	T	S	I	I	T	C	Y	S	N	H	T	C	P	P	C	1	7	7
116	C	P	P	C	D	L	L	K	L	R	L	K	P	R	C	P	P	T	L	S	T	S	I	I	T	C	Y	S	N	H	T	C	P	P	C	1	7	7
117	C	P	P	C	D	L	L	K	L	L	S	A	L	N	C	A	T	S	T	P	T	S	I	I	T	C	Y	S	N	H	T	C	P	P	C	1	7	7
118	C	P	P	C	D	L	L	K	L	D	R	V	N	S	C	L	P	I	L	V	T	S	I	I	T	C	Y	S	N	H	T	C	P	P	C	1	7	7
119	C	P	P	C	D	L	L	K	L	A	G	N	N	L	C	H	I	N	V	S	T	S	I	I	T	C	Y	S	N	H	T	C	P	P	C	1	7	7
120	C	P	P	C	D	L	L	K	L	A	H	N	L	H	C	P	E	N	V	W	T	S	I	I	T	C	Y	S	N	H	T	C	P	P	C	1	7	7
121	C	P	P	C	D	L	L	K	L	V	T	S	A	L	C	T	P	P	T	P	T	S	I	I	T	C	Y	S	N	H	T	C	P	P	C	1	7	7
122	C	P	P	C	D	L	L	K	L	V	G	L	W	N	C	S	L	Q	M	K	T	S	I	I	T	C	Y	S	N	H	T	C	P	P	C	1	7	7
123	C	P	P	C	D	L	L	K	L	*	H	S	Q	L	C	S	G	T	*	E	T	S	I	I	T	C	Y	S	N	H	T	C	P	P	C	1	7	7
124	C	P	P	C	D	L	L	K	L	F	N	T	S	N	C	G	D	I	N	I	P	S	I	I	T	C	Y	S	N	H	T	C	P	P	C	1	7	7
125	C	P	P	C	D	L	L	K	L	I	R	G	V	A	C	D	P	G	W	N	T	S	I	I	T	C	Y	S	N	H	T	C	P	P	C	1	6	6
126	C	P	P	C	D	L	L	K	L	L	R	L	S	P	C	N	K	P	S	R	T	S	I	I	T	C	Y	S	N	H	T	C	P	P	C	1	6	6
127	C	P	P	C	D	L	L	K	L	A	W	N	A	A	C	P	D	G	L	L	P	S	I	I	T	C	Y	S	N	H	T	C	P	P	C	1	6	6
128	C	P	P	C	D	L	L	K	L	A	W	Q	P	R	C	P	I	I	I	H	T	S	I	I	T	C	Y	S	N	H	T	C	P	P	C	1	6	6
129	C	P	P	C	D	L	L	K	L	V	L	M	D	M	C	S	G	Q	E	H	T	S	I	I	T	C	Y	S	N	H	T	C	P	P	C	1	6	6
130	C	P	P	C	D	L	L	K	L	Y	W	P	T	P	C	V	E	G	P	S	T	S	I	I	T	C	Y	S	N	H	T	C	P	P	C	1	6	6
131	C	P	P	C	D	L	L	K	L	L	L	Q	T	H	C	E	L	R	G	P	T	S	L	I	T	C	Y	S	N	H	T	C	P	P	C	1	6	6
132	C	P	P	C	D	L	L	K	L	F	N	T	S	N	C	G	D	I	H	I	T	S	I	I	T	C	Y	S	N	H	T	C	P	P	C	1	6	6
133	C	P	P	C	D	L	L	K	L	T	L	P	T	R	C	K	I	R	L	S	T	S	I	I	T	C	Y	S	N	H	T	C	P	P	C	1	5	5
134	C	P	P	C	D	L	L	K	L	T	L	T	P	W	C	D	R	L	L	V	T	S	I	I	T	C	Y	S	N	H	T	C	P	P	C	1	5	5
135	C	P	P	C	D	L	L	K	L	M	A	N	S	S	C	E	L	H	F	H	T	S	I	I	T	C	Y	S	N	H	T	C	P	P	C	1	5	5
136	C	P	P	C	D	L	L	K	L	I	R	V	A	S	C	P	M	G	R	T	T	S	I	I	T	C	Y	S	N	H	T	C	P	P	C	1	5	5
137	C	P	P	C	D	L	L	K	L	H	L	P	L	T	C	L	T	S	P	P	T	S	L	I	T	C	Y	S	N	H	T	C	P	P	C	1	5	5
138	C	P	P	C	D	L	L	K	L	H	L	P	L	T	C	L	T	S	P	P	P	S	I	I	T	C	Y	S	N	H	T	C	P	P	C	1	5	5
139	C	P	P	C	D	L	L	K	L	R	R	P	T	P	C	T	R	N	R	S	T	S	I	I	T	C	Y	S	N	H	T	C	P	P	C	1	5	5
140	C	P	P	C	D	L	L	K	L	L	Y	N	S	F	C	P	P	P	P	A	T	S	L	I	T	C	Y	S	N	H	T	C	P	P	C	1	5	5
141	C	P	P	C	D	L	L	K	L	L	P	T	K	L	C	N	R	G	H	*	T	S	I	I	T	C	Y	S	N	H	T	C	P	P	C	1	5	5
142	C	P	P	C	D	L	L	K	L	L	V	S	R	W	C	T	R	P	R	T	T	S	I	I	T	C	Y	S	N	H	T	C	P	P	C	1	5	5
143	C	P	P	C	D	L	L	K	L	L	V	V	S	P	C	T	P	P	G	T	T	S	I	I	T	C	Y	S	N	H	T	C	P	P	C	1	5	5
144	C	P	P	C	D	L	L	K	L	D	V	M	T	Y	C	K	E	W	L	H	T	S	I	I	T	C	Y	S	N	H	T	C	P	P	C	1	5	5
145	C	P	P	C	D	L	L	K	L	A	L	V	L	L	C	T	P	E	M	P	P	S	I	I	T	C	Y	S	N	H	T	C	P	P	C	1	5	5
146	C	P	P	C	D	L	L	K	L	G	N	W	Y	V	C	L	E	Q	P	D	P	S	I	I	T	C	Y	S	N	H	T	C	P	P	C	1	5	5
147	C	P	P	C	D	L	L	K	L	F	N	T	S	N	C	G	D	I	N	I	S	S	I	I	T	C	Y	S	N	H	T	C	P	P	C	1	5	5
148	C	P	P	C	D	L	L	K	L	T	H	P	L	Y	C	M	L	R	P	A	T	S	I	I	T	C	Y	S	N	H	T	C	P	P	C	1	4	4
149	C	P	P	C	D	L	L	K	L	T	L	Q	W	H	C	V	A	R	Q	E	T	S	I	I	T	C	Y	S	N	H	T	C	P	P	C	1	4	4
150	C	P	P	C	D	L	L	K	L	S	S	I	P	F	C	K	G	N	S	P	T	S	I	I	T	C	Y	S	N	H	T	C	P	P	C	1	4	4
151	C	P	P	C	D	L	L	K	L	I	E	K	L	Q	C	I	P	L	T	G	T	S	I	I	T	C	Y	F	N	H	T	C	P	P	C	1	4	4
152	C	P	P	C	D	L	L	K	L	Q	L	I	K	T	C	S	N	L	L	A	T	S	I	I	T	C	Y	S	N	H	T	C	P	P	C	1	4	4
153	C	P	P	C	D	L	L	K	L	R	T	D	T	N	C	S	N	K	Q	A	T	S	I	I	T	C	Y	S	N	H	T	C	P	P	C	1	4	4
154	C	P	P	C	D	L	L	K	L	R	P	E	A	T	C	L	Q	R	W	L	P	S	I	I	T	C	Y	S	N	H	T	C	P	P	C	1	4	4
155	C	P	P	C	D	L	L	K	L	L	Q	G	V	S	C	V	R	D	V	E	T	S	I	I	T	C	Y	S	N	H	T	C	P	P	C	1	4	4
156	C	P	P	C	D	L	L	K	L	E	P	P	Q	R	C	A	E	N	Y	S	T	S	I	I	T	C	Y	S	N	H	T	C	P	P	C	1	4	4
157	C	P	P	C	D	L	L	K	L	E	A	V	E	P	C	K	S	D	N	D	T	S	I	I	T	C	Y	S	N	H	T	C	P	P	C	1	4	4
158	C	P	P	C	D	L	L	K	L	D	S	S	E	P	C	L	I	Y	E	N	T	S	I	I	T	C	Y	S	N	H	T	C	P	P	C	1	4	4
159	C	P	P	C	D	L	L	K	L	D	W	R	L	E	C	Q	K	D	L	P	T	S	I	I	T	C	Y	S	N	H	T	C	P	P	C	1	4	4
160	C	P	P	C	D	L	L	K	L	A	T	L	T	P	C	P	P	P	P	A	T	F	I	I	T	C	Y	S	N	H	T	C	P	P	C	1	4	4
161	C	P	P	C	D	L	L	K	L	A	D	A	Y	V	C	R	N	W	M	G	T	S	I	I	T	C	Y	S	N	H	T	C	P	P	C	1	4	4
162	C	P	P	C	D	L	L	K	L	A	Y	P	E	G	C	L	S	N	L	V	T	S	I	I	T	C	Y	S	N	H	T	C	P	P	C	1	4	4
163	C	P	P	C	D	L	L	K	L	G	I	P	R	L	C	R	T	I	S	L	T	S	I	I	T	C	Y	S	N	H	T	C	P	P	C	1	4	4
164	C	P	P	C	D	L	L	K	L	G	L	R	F	Q	C	D	S	G	T	L	T	S	I	I	T	C	Y	S	N	H	T	C	P	P	C	1	4	4
165	C	P	P	C	D	L	L	K	L	V	P	H	R	G	C	S	G	D	T	V	T	S	I	I	T	C	Y	S	N	H	T	C	P	P	C	1	4	4
166	C	P	P	C	D	L	L	K	L	V	V	P	L	T	C	G	W	G	Y	G	T	S	I	I	T	C	Y	S	N	H	T	C	P	P	C	1	4	4
167	C	P	P	C	D	L	L	K	L	S	N	L	H	R	C	Q	T	I	A	Y	T	S	I	I	T	C	Y	S	N	H	T	C	P	P	C	1	4	4
168	C	P	P	C	D	L	L	K	L	S	L	E	F	A	C	N	G	G	F	H	T	S	I	I	T	C	Y	S	N	H	T	C	P	P	C	1	4	4
169	C	P	P	C	D	L	L	K	L	L	L	Q	T	H	C	E	L	R	G	P	S	S	I	I	T	C	Y	S	N	H	T	C	P	P	C	1	4	4
170	C	P	P	C	D	L	L	K	L	L	L	K	E	S	C	N	R	V	H	N	T	S	I	I	T	C	Y	S	N	H	T	C	P	P	C	1	4	4
171	C	P	P	C	D	L	L	K	L	K	R	P	Q	D	C	A	I	N	A	S	T	S	I	I	T	C	Y	S	N	H	T	C	P	P	C	1	3	3
172	C	P	P	C	D	L	L	K	L	T	V	H	P	I	C	N	L	S	T	D	T	S	I	I	T	C	Y	S	N	H	T	C	P	P	C	1	3	3
173	C	P	P	C	D	L	L	K	L	R	N	I	L	H	C	S	H	E	I	I	T	S	I	I	T	C	Y	S	N	H	T	C	P	P	C	1	3	3
174	C	P	P	C	D	L	L	K	L	S	Y	W	L	V	C	R	R	A	Q	G	T	S	I	I	T	C	Y	S	N	H	T	C	P	P	C	1	3	3
175	C	P	P	C	D	L	L	K	L	S	L	A	A	L	C	E	G	W	N	P	T	S	I	I	T	C	Y	S	N	H	T	C	P	P	C	1	3	3
176	C	P	P	C	D	L	L	K	L	M	A	S	F	S	C	T	D	P	L	V	T	S	I	I	T	C	Y	S	N	H	T	C	P	P	C	1	3	3
177	C	P	P	C	D	L	L	K	L	M	G	E	T	R	C	Q	P	L	E	L	P	S	I	I	T	C	Y	S	N	H	T	C	P	P	C	1	3	3
178	C	P	P	C	D	L	L	K	L	I	N	I	H	V	C	F	N	I	N	N	T	S	I	I	T	C	Y	S	N	H	T	C	P	P	C	1	3	3
179	C	P	P	C	D	L	L	K	L	I	I	S	N	D	C	S	A	S	E	L	T	S	I	I	T	C	Y	S	N	H	T	C	P	P	C	1	3	3
180	C	P	P	C	D	L	L	K	L	I	R	A	S	L	C	V	N	S	L	G	T	S	I	I	T	C	Y	S	N	H	T	C	P	P	C	1	3	3
181	C	P	P	C	D	L	L	K	L	I	G	P	S	P	C	N	D	S	E	L	T	S	L	I	T	C	Y	S	N	H	T	C	P	P	C	1	3	3
182	C	P	P	C	D	L	L	K	L	I	G	P	S	P	C	N	D	S	E	L	S	S	I	I	T	C	Y	S	N	H	T	C	P	P	C	1	3	3
183	C	P	P	C	D	L	L	K	L	H	L	K	R	N	C	M	Q	G	G	N	T	S	I	I	T	C	Y	S	N	H	T	C	P	P	C	1	3	3
184	C	P	P	C	D	L	L	K	L	H	A	R	S	I	C	G	N	T	H	A	T	S	I	I	T	C	Y	S	N	H	T	C	P	P	C	1	3	3
185	C	P	P	C	D	L	L	K	L	R	P	Y	Y	F	C	Y	R	I	T	D	P	S	I	I	T	C	Y	S	N	H	T	C	P	P	C	1	3	3
186	C	P	P	C	D	L	L	K	L	R	V	F	E	R	C	N	M	A	M	L	T	S	I	I	T	C	Y	S	N	H	T	C	P	P	C	1	3	3
187	C	P	P	C	D	L	L	K	L	L	T	Y	S	N	C	Y	P	L	D	R	T	S	I	I	T	C	Y	S	N	H	T	C	P	P	C	1	3	3
188	C	P	P	C	D	L	L	K	L	L	S	R	T	G	C	F	N	V	P	G	T	S	I	I	T	C	Y	S	N	H	T	C	P	P	C	1	3	3
189	C	P	P	C	D	L	L	K	L	L	P	T	K	L	C	N	R	G	H	E	T	S	I	I	T	C	Y	S	N	H	T	C	P	P	C	1	3	3
190	C	P	P	C	D	L	L	K	L	L	P	T	K	L	C	N	R	G	H	E	T	S	I	I	T	C	Y	S	N	H	T	C	P	P	C	1	3	3
191	C	P	P	C	D	L	L	K	L	E	T	I	L	V	C	K	R	S	A	H	T	S	I	I	T	C	Y	S	N	H	T	C	P	P	C	1	3	3
192	C	P	P	C	D	L	L	K	L	E	M	I	T	L	C	Y	L	R	A	T	T	S	I	I	T	C	Y	S	N	H	T	C	P	P	C	1	3	3
193	C	P	P	C	D	L	L	K	L	E	Q	A	S	L	C	M	G	N	D	K	T	S	I	I	T	C	Y	S	N	H	T	C	P	P	C	1	3	3
194	C	P	P	C	D	L	L	K	L	E	S	V	R	L	C	N	E	T	N	V	T	S	I	I	T	C	Y	S	N	H	T	C	P	P	C	1	3	3
195	C	P	P	C	D	L	L	K	L	D	N	E	T	F	C	D	L	L	R	A	T	S	I	I	T	C	Y	S	N	H	T	C	P	P	C	1	3	3
196	C	P	P	C	D	L	L	K	L	D	I	I	L	I	C	H	Y	T	S	Y	T	S	I	I	T	C	Y	S	N	H	T	C	P	P	C	1	3	3
197	C	P	P	C	D	L	L	K	L	A	G	T	H	G	C	V	I	W	E	N	T	S	I	I	T	C	Y	S	N	H	T	C	P	P	C	1	3	3
198	C	P	P	C	D	L	L	K	L	A	W	N	A	A	C	P	D	G	L	L	T	S	I	I	T	C	Y	S	N	H	T	C	P	P	C	1	3	3
199	C	P	P	C	D	L	L	K	L	A	W	N	A	A	C	P	D	G	L	L	T	S	L	I	T	C	Y	S	N	H	T	C	P	P	C	1	3	3
200	C	P	P	C	D	L	L	K	L	A	W	Q	P	R	C	P	I	I	L	H	T	S	I	I	T	C	Y	S	N	H	T	C	P	P	C	1	3	3
201	C	P	P	C	D	L	L	K	L	A	P	T	I	M	C	E	R	D	E	A	T	S	I	I	T	C	Y	S	N	H	T	C	P	P	C	1	3	3
202	C	P	P	C	D	L	L	K	L	G	N	N	S	S	C	K	D	I	R	G	T	S	I	I	T	C	Y	S	N	H	T	C	P	P	C	1	3	3
203	C	P	P	C	D	L	L	K	L	G	G	G	A	V	C	E	A	S	E	W	T	S	I	I	T	C	Y	S	N	H	T	C	P	P	C	1	3	3
204	C	P	P	C	D	L	L	K	L	G	L	D	E	T	C	A	L	L	A	H	T	S	I	I	T	C	Y	S	N	H	T	C	P	P	C	1	3	3
205	C	P	P	C	D	L	L	K	L	V	F	R	Q	P	C	S	A	E	G	L	T	S	I	I	T	C	Y	S	N	H	T	C	P	P	C	1	3	3
206	C	P	P	C	D	L	L	K	L	V	S	Q	P	A	C	G	P	L	S	L	T	S	I	I	T	C	Y	S	N	H	T	C	P	P	C	1	3	3
207	C	P	P	C	D	L	L	K	L	*	Y	N	S	E	C	T	F	S	P	Q	T	S	I	I	T	C	Y	S	N	H	T	C	P	P	C	1	3	3
208	C	P	P	C	D	L	L	K	L	S	E	W	K	L	C	R	G	H	S	V	T	S	I	I	T	C	Y	S	N	H	T	C	P	P	C	1	3	3
209	C	P	P	C	D	L	L	K	L	S	F	V	L	N	C	Y	S	G	L	G	T	S	I	I	T	C	Y	S	N	H	T	C	P	P	C	1	3	3
210	C	P	P	C	D	L	L	K	L	L	N	I	W	H	C	N	R	E	L	Y	S	S	I	I	T	C	Y	S	N	H	T	C	P	P	C	1	3	3
211	C	P	P	C	D	L	L	K	L	L	L	Q	T	H	C	E	L	R	G	P	T	S	I	I	T	C	Y	S	N	H	T	C	P	P	C	1	3	3
212	C	P	P	C	D	L	L	K	L	L	L	Q	T	H	C	E	L	R	G	P	S	S	I	I	T	C	Y	S	N	H	T	C	P	P	C	1	3	3
213	C	P	P	C	D	L	L	K	L	F	N	T	S	N	C	G	D	I	K	I	T	S	I	I	T	C	Y	S	N	H	T	C	P	P	C	1	3	3
214	C	P	P	C	D	L	L	K	L	F	V	R	S	S	C	G	G	R	I	P	T	S	I	I	T	C	Y	S	N	H	T	C	P	P	C	1	3	3
215	C	P	P	C	D	L	P	K	L	L	Y	N	S	F	C	P	P	P	P	A	T	S	I	I	T	C	Y	S	N	H	T	C	P	P	C	1	2	2
216	C	P	P	C	D	L	P	K	L	L	N	I	W	H	C	N	R	E	L	Y	T	S	I	I	T	C	Y	S	N	H	T	C	P	P	C	1	2	2
217	C	P	P	C	D	L	L	K	L	L	A	P	K	P	C	A	P	G	A	S	T	S	I	I	T	C	Y	S	N	H	T	C	P	P	C	1	2	2
218	C	P	P	C	D	L	L	K	L	L	L	Q	T	H	C	E	L	R	G	P	T	S	I	I	T	C	Y	S	N	H	T	C	P	P	C	1	2	2
219	C	P	P	C	D	L	L	K	P	L	L	Q	T	H	C	E	L	R	G	P	T	S	I	I	T	C	Y	S	N	H	T	C	P	P	C	1	2	2
220	C	P	P	C	D	L	L	K	L	Q	K	R	V	E	C	L	S	N	A	T	T	S	I	I	T	C	Y	S	N	H	T	C	P	P	C	1	2	2
221	C	P	P	C	D	L	L	K	L	K	H	F	L	R	C	A	T	S	S	A	T	S	I	I	T	C	Y	S	N	H	T	C	P	P	C	1	2	2
222	C	P	P	C	D	L	L	K	L	K	V	E	L	L	C	T	G	P	T	L	T	S	I	L	T	C	Y	S	N	H	T	C	P	P	C	1	2	2
223	C	P	P	C	D	L	L	K	L	K	V	E	L	L	C	T	G	P	T	L	P	S	I	I	T	C	Y	S	N	H	T	C	P	P	C	1	2	2
224	C	P	P	C	D	L	L	K	L	K	S	N	R	V	C	L	L	R	G	V	T	S	I	I	T	C	Y	S	N	H	T	C	P	P	C	1	2	2
225	C	P	P	C	D	L	L	K	L	K	L	K	S	K	C	E	L	L	D	S	T	S	I	I	T	C	Y	S	N	H	T	C	P	P	C	1	2	2
226	C	P	P	C	D	L	L	K	L	T	S	K	P	P	C	G	P	E	P	S	T	S	I	I	T	C	Y	S	N	H	T	C	P	P	C	1	2	2
227	C	P	P	C	D	L	L	K	L	T	P	Q	P	P	C	R	I	L	S	L	T	S	I	I	T	C	Y	S	N	H	T	C	P	P	C	1	2	2
228	C	P	P	C	D	L	L	K	L	T	A	I	R	G	C	S	E	R	P	S	T	S	I	I	T	C	Y	S	N	H	T	C	P	P	C	1	2	2
229	C	P	P	C	D	L	L	K	L	T	G	V	A	D	C	R	Q	F	P	*	T	S	I	I	T	C	Y	S	N	H	T	C	P	P	C	1	2	2
230	C	P	P	C	D	L	L	K	L	T	G	V	A	D	C	R	Q	F	P	*	T	S	I	I	T	C	Y	S	N	H	T	C	P	P	C	1	2	2
231	C	P	P	C	D	L	L	K	L	R	S	R	R	M	C	A	S	F	P	A	T	S	I	I	T	C	Y	S	N	H	T	C	P	P	C	1	2	2
232	C	P	P	C	D	L	L	K	L	I	G	P	S	P	C	N	D	S	E	L	T	S	I	I	T	C	Y	S	N	H	T	C	P	P	C	1	2	2
233	C	P	P	C	D	L	L	K	L	M	M	A	I	L	C	R	P	A	S	D	T	S	I	I	T	C	Y	S	N	H	T	C	P	P	C	1	2	2
234	C	P	P	C	D	L	L	K	L	M	M	A	I	L	C	R	P	A	S	D	P	S	I	I	T	C	Y	S	N	H	T	C	P	P	C	1	2	2
235	C	P	P	C	D	L	L	K	L	M	A	N	S	S	C	E	I	H	V	H	T	S	I	I	T	C	Y	S	N	H	T	C	P	P	C	1	2	2
236	C	P	P	C	D	L	L	K	L	I	P	R	T	P	C	L	H	A	F	A	T	S	I	I	T	C	Y	S	N	H	T	C	P	P	C	1	2	2
237	C	P	P	C	D	L	L	K	L	I	G	P	S	P	C	N	D	S	E	L	T	S	I	I	T	C	Y	S	N	H	T	C	P	P	C	1	2	2
238	C	P	P	C	D	L	L	K	L	I	V	R	G	I	C	E	E	E	W	R	P	S	I	I	T	C	Y	S	N	H	T	C	P	P	C	1	2	2
239	C	P	P	C	D	L	L	K	L	Q	K	R	V	E	C	L	S	N	A	T	T	S	I	I	T	C	Y	S	N	H	T	C	P	P	C	1	2	2
240	C	P	P	C	D	L	L	K	L	Q	K	R	V	E	C	L	S	N	A	T	S	S	I	I	T	C	Y	S	N	H	T	C	P	P	C	1	2	2
241	C	P	P	C	D	L	L	K	L	Q	K	R	V	E	C	L	S	N	A	T	S	S	I	I	T	C	Y	S	N	H	T	C	P	P	C	1	2	2
242	C	P	P	C	D	L	L	K	L	H	L	P	L	T	C	L	T	S	P	P	T	S	I	I	T	C	Y	S	N	H	T	C	P	P	C	1	2	2
243	C	P	P	C	D	L	L	K	L	H	L	P	L	T	C	L	T	S	P	P	T	S	I	I	T	C	Y	S	N	H	T	C	P	P	C	1	2	2
244	C	P	P	C	D	L	L	K	L	H	L	P	L	T	C	L	T	S	P	P	T	P	I	I	T	C	Y	S	N	H	T	C	P	P	C	1	2	2
245	C	P	P	C	D	L	L	K	L	H	V	H	N	I	C	D	L	M	V	V	T	S	I	I	T	C	Y	S	N	H	T	C	P	P	C	1	2	2
246	C	P	P	C	D	L	L	K	L	P	P	L	H	N	C	I	Y	V	Q	V	T	S	I	I	T	C	Y	S	N	H	T	C	P	P	C	1	2	2
247	C	P	P	C	D	L	L	K	L	P	A	N	T	T	C	R	V	P	N	A	T	S	L	I	T	C	Y	S	N	H	T	C	P	P	C	1	2	2
248	C	P	P	C	D	L	L	K	L	P	A	N	T	T	C	R	V	P	N	A	P	S	I	I	T	C	Y	S	N	H	T	C	P	P	C	1	2	2
249	C	P	P	C	D	L	L	K	L	P	F	L	L	R	C	T	L	H	S	S	T	S	I	I	T	C	Y	S	N	H	T	C	P	P	C	1	2	2
250	C	P	P	C	D	L	L	K	L	R	P	G	N	N	C	A	G	S	Q	V	T	S	I	I	T	C	Y	S	N	H	T	C	P	P	C	1	2	2
251	C	P	P	C	D	L	L	K	L	R	G	I	L	D	C	R	M	V	D	P	T	S	I	I	T	C	Y	S	N	H	T	C	P	P	C	1	2	2
252	C	P	P	C	D	L	L	K	L	L	R	G	T	T	C	L	P	T	S	P	T	S	I	L	T	C	Y	S	N	H	T	C	P	P	C	1	2	2
253	C	P	P	C	D	L	L	K	L	L	L	A	S	E	C	R	A	A	F	H	T	S	I	I	T	C	Y	S	N	H	T	C	P	P	C	1	2	2
254	C	P	P	C	D	L	L	K	L	L	L	S	D	G	C	G	M	M	G	H	T	S	I	I	T	C	Y	S	N	H	T	C	P	P	C	1	2	2
255	C	P	P	C	D	L	L	K	L	L	A	H	P	P	C	Y	R	D	W	N	T	P	I	I	T	C	Y	S	N	H	T	C	P	P	C	1	2	2
256	C	P	P	C	D	L	L	K	L	L	A	H	P	P	C	Y	R	D	W	N	T	S	I	I	T	C	Y	S	N	H	T	C	P	P	C	1	2	2
257	C	P	P	C	D	L	L	K	L	L	A	H	P	P	C	Y	R	D	W	N	T	S	L	I	T	C	Y	S	N	H	T	C	P	P	C	1	2	2
258	C	P	P	C	D	L	L	K	L	L	A	H	P	P	C	Y	R	Y	W	N	T	S	I	I	T	C	Y	S	N	H	T	C	P	P	C	1	2	2
259	C	P	P	C	D	L	L	K	L	L	Y	N	S	F	C	P	P	P	P	A	T	P	I	I	T	C	Y	S	N	H	T	C	P	P	C	1	2	2
260	C	P	P	C	D	L	L	K	L	L	F	Y	S	G	C	P	P	Q	P	L	T	S	I	I	T	C	Y	S	N	H	T	C	P	P	C	1	2	2
261	C	P	P	C	D	L	L	K	L	L	T	R	R	R	C	H	P	Y	R	S	T	S	I	I	T	C	Y	S	N	H	T	C	P	P	C	1	2	2
262	C	P	P	C	D	L	L	K	L	L	R	G	S	P	C	S	H	P	G	D	P	S	I	I	T	C	Y	S	N	H	T	C	P	P	C	1	2	2
263	C	P	P	C	D	L	L	K	L	L	M	S	A	P	C	P	P	T	S	T	T	S	I	I	T	C	Y	S	N	H	T	C	P	P	C	1	2	2
264	C	P	P	C	D	L	L	K	L	L	P	T	K	L	C	N	R	G	H	E	T	S	S	I	T	C	Y	S	N	H	T	C	P	P	C	1	2	2
265	C	P	P	C	D	L	L	K	L	L	P	T	K	L	C	N	R	G	H	E	T	S	I	I	T	C	Y	S	N	H	T	C	P	P	C	1	2	2
266	C	P	P	C	D	L	L	K	L	L	P	T	K	L	C	N	R	G	H	E	P	S	I	I	T	C	Y	S	N	H	T	C	P	P	C	1	2	2
267	C	P	P	C	D	L	L	K	L	L	P	T	K	L	C	N	W	G	H	E	T	S	I	I	T	C	Y	S	N	H	T	C	P	P	C	1	2	2
268	C	P	P	C	D	L	L	K	L	L	P	T	K	L	C	T	R	G	H	E	T	S	I	I	T	C	Y	S	N	H	T	C	P	P	C	1	2	2
269	C	P	P	C	D	L	L	K	L	L	A	P	K	P	C	A	P	G	A	S	P	S	I	I	T	C	Y	S	N	H	T	C	P	P	C	1	2	2
270	C	P	P	C	D	L	L	K	L	L	V	L	V	L	C	G	A	L	A	P	P	S	I	I	T	C	Y	S	N	H	T	C	P	P	C	1	2	2
271	C	P	P	C	D	L	L	K	L	L	S	P	S	P	C	P	H	H	V	P	T	S	I	I	T	C	Y	S	N	H	T	C	P	P	C	1	2	2
272	C	P	P	C	D	L	L	K	L	E	T	I	L	V	C	K	R	S	A	D	P	S	I	I	T	C	Y	S	N	H	T	C	P	P	C	1	2	2
273	C	P	P	C	D	L	L	K	L	D	W	R	P	N	C	G	V	V	L	F	T	S	I	I	T	C	Y	S	N	H	T	C	P	P	C	1	2	2
274	C	P	P	C	D	L	L	K	L	A	V	T	G	G	C	D	R	G	I	V	T	S	I	I	M	C	Y	S	N	H	T	C	P	P	C	1	2	2
275	C	P	P	C	D	L	L	K	L	A	W	N	A	A	C	P	D	G	R	L	T	S	I	I	T	C	Y	S	N	H	T	C	P	P	C	1	2	2
276	C	P	P	C	D	L	L	K	L	A	L	N	A	A	C	P	D	G	L	L	T	S	I	I	T	C	Y	S	N	H	T	C	P	P	C	1	2	2
277	C	P	P	C	D	L	L	K	L	A	F	S	E	L	C	D	G	V	T	R	T	S	I	I	T	C	Y	S	N	H	T	C	P	P	C	1	2	2
278	C	P	P	C	D	L	L	K	L	A	T	P	V	A	C	L	T	L	L	V	T	S	I	I	T	C	Y	S	N	H	T	C	P	P	C	1	2	2
279	C	P	P	C	D	L	L	K	L	A	P	T	W	L	C	F	Y	G	R	E	T	S	I	I	T	C	Y	S	N	H	T	C	P	P	C	1	2	2
280	C	P	P	C	D	L	L	K	L	G	V	L	I	Y	C	A	Q	R	M	E	T	S	I	I	T	C	Y	S	N	H	T	C	P	P	C	1	2	2
281	C	P	P	C	D	L	L	K	L	G	S	R	R	Y	C	P	V	G	*	R	T	S	I	I	T	C	Y	S	N	H	T	C	P	P	C	1	2	2
282	C	P	P	C	D	L	L	K	L	G	V	R	W	Y	C	K	S	E	E	L	T	S	I	I	T	C	Y	S	N	H	T	C	P	P	C	1	2	2
283	C	P	P	C	D	L	L	K	L	V	L	V	D	H	C	E	T	W	A	Q	T	S	I	I	T	C	Y	S	N	H	T	C	P	P	C	1	2	2
284	C	P	P	C	D	L	L	K	L	V	A	H	H	R	C	Y	S	R	L	Y	T	S	I	I	T	C	Y	S	N	H	T	C	P	P	C	1	2	2
285	C	P	P	C	D	L	L	K	L	V	*	F	R	S	C	H	V	T	S	P	T	S	I	I	T	C	Y	S	N	H	T	C	P	P	C	1	2	2
286	C	P	P	C	D	L	L	K	L	Y	S	S	G	D	C	V	M	A	S	T	T	S	I	I	T	C	Y	S	N	H	T	C	P	P	C	1	2	2
287	C	P	P	C	D	L	L	K	L	Y	I	D	N	S	C	S	I	E	W	D	P	S	I	I	T	C	Y	S	N	H	T	C	P	P	C	1	2	2
288	C	P	P	C	D	L	L	K	L	Y	I	V	W	Q	C	G	A	D	D	G	T	S	I	I	T	C	Y	S	N	H	T	C	P	P	C	1	2	2
289	C	P	P	C	D	L	L	K	L	L	K	I	V	P	C	D	T	Q	S	R	T	S	I	I	T	C	Y	S	N	H	T	C	P	P	C	1	2	2
290	C	P	P	C	D	L	L	K	L	L	N	I	R	H	C	N	R	E	L	Y	T	S	I	I	T	C	Y	S	N	H	T	C	P	P	C	1	2	2
291	C	P	P	C	D	L	L	K	L	L	N	I	W	H	C	N	R	E	L	Y	T	S	I	I	T	C	Y	S	N	H	T	C	P	P	C	1	2	2
292	C	P	P	C	D	L	L	K	L	L	N	I	W	H	C	N	R	E	L	Y	T	A	I	I	T	C	Y	S	N	H	T	C	P	P	C	1	2	2
293	C	P	P	C	D	L	L	K	L	L	S	H	Y	L	C	T	V	S	R	P	T	S	I	I	T	C	Y	S	N	H	T	C	P	P	C	1	2	2
294	C	P	P	C	D	L	L	K	L	L	L	Q	T	H	C	E	P	R	G	P	T	S	I	I	T	C	Y	S	N	H	T	C	P	P	C	1	2	2
295	C	P	P	C	D	L	L	K	L	L	L	Q	T	H	C	E	L	R	G	P	T	P	I	I	T	C	Y	S	N	H	T	C	P	P	C	1	2	2
296	C	P	P	C	D	L	L	K	L	L	L	Q	T	H	C	E	L	R	G	P	T	S	S	I	T	C	Y	S	N	H	T	C	P	P	C	1	2	2
297	C	P	P	C	D	L	L	K	L	L	L	Q	T	H	C	E	L	R	G	P	T	S	I	I	T	C	Y	S	N	H	T	C	P	P	C	1	2	2
298	C	P	P	C	D	L	L	K	L	L	L	Q	T	H	C	E	L	R	G	P	T	S	I	I	T	C	Y	S	N	H	T	C	P	P	C	1	2	2
299	C	P	P	C	D	L	L	K	L	L	L	Q	T	H	C	E	L	R	G	P	A	S	I	I	T	C	Y	S	N	H	T	C	P	P	C	1	2	2
300	C	P	P	C	D	L	L	K	L	L	L	D	T	L	C	W	G	N	K	H	T	S	I	I	T	C	Y	S	N	H	T	C	P	P	C	1	2	2
301	C	P	P	C	D	L	L	K	L	F	N	K	S	Q	C	N	Q	T	T	L	T	S	I	I	T	C	Y	S	N	H	T	C	P	P	C	1	2	2
302	C	P	P	C	D	L	L	K	L	F	N	T	S	N	C	G	D	I	N	I	T	S	I	I	T	C	Y	S	N	H	T	C	P	P	C	1	2	2
303	C	P	P	C	D	L	L	K	L	F	N	T	S	N	C	G	D	I	N	I	T	S	L	I	T	C	Y	S	N	H	T	C	P	P	C	1	2	2
304	C	P	P	C	D	L	L	K	L	F	N	T	S	N	C	G	D	I	I	I	T	S	I	I	T	C	Y	S	N	H	T	C	P	P	C	1	2	2
305	C	P	P	C	D	L	L	K	L	F	P	T	K	L	C	N	R	G	H	E	T	S	I	I	T	C	Y	S	N	H	T	C	P	P	C	1	2	2
306	C	P	P	C	D	L	P	K	L	S	F	V	L	N	C	Y	S	G	L	G	P	S	I	I	T	C	Y	S	N	H	T	C	P	P	C	1	1	1
307	C	P	P	C	D	L	P	K	L	L	L	Q	T	H	C	E	L	R	G	P	T	S	I	I	T	C	Y	S	N	H	T	C	P	P	C	1	1	1
308	C	P	P	C	D	L	P	K	L	F	N	T	S	N	C	G	D	I	N	I	T	S	I	I	T	C	Y	S	N	H	T	C	P	P	C	1	1	1
309	C	P	P	C	D	L	R	K	L	M	A	N	S	S	C	E	I	H	F	H	T	S	I	I	T	C	Y	S	N	H	T	C	P	P	C	1	1	1
310	C	P	P	C	D	L	R	K	L	L	A	H	P	P	C	Y	R	D	W	N	T	S	I	I	T	C	Y	S	N	H	T	C	P	P	C	1	1	1
311	C	P	P	C	D	L	L	K	L	L	A	P	K	P	C	A	P	G	A	S	T	S	I	I	T	C	Y	S	N	H	T	C	P	P	C	1	1	1
312	C	P	P	C	D	L	L	K	L	K	V	E	L	L	C	T	G	P	T	L	T	S	I	I	T	C	Y	S	N	H	T	C	P	P	C	1	1	1
313	C	P	P	C	D	L	L	K	L	H	L	P	L	T	C	L	T	S	P	P	T	S	I	I	T	C	Y	S	N	H	T	C	P	P	C	1	1	1
314	C	P	P	C	D	L	L	K	L	L	R	G	S	P	C	S	H	P	G	D	T	S	I	I	T	C	Y	S	N	H	T	C	P	P	C	1	1	1
315	C	P	P	C	D	L	L	K	L	D	N	E	T	F	C	D	L	L	R	A	T	S	I	I	T	C	Y	S	N	H	T	C	P	P	C	1	1	1
316	C	P	P	C	D	L	L	K	L	V	S	A	G	R	C	P	Y	P	T	P	T	S	I	I	T	C	Y	S	N	H	T	C	P	P	C	1	1	1
317	C	P	P	C	D	L	L	K	L	F	N	T	S	N	C	G	D	I	N	I	T	S	I	I	T	C	Y	S	N	H	T	C	P	P	C	1	1	1
318	C	P	P	C	D	L	L	K	L	L	A	H	P	P	C	Y	R	D	W	N	T	S	I	I	T	C	Y	S	N	H	T	C	P	P	C	1	1	1
319	C	P	P	C	D	L	L	K	H	L	N	I	W	H	C	N	R	E	L	Y	T	S	I	I	T	C	Y	S	N	H	T	C	P	P	C	1	1	1
320	C	P	P	C	D	L	L	K	P	S	V	R	W	Y	C	K	S	E	E	L	T	S	I	I	T	C	Y	S	N	H	T	C	P	P	C	1	1	1
321	C	P	P	C	D	L	L	K	P	P	A	N	T	T	C	R	V	P	N	A	T	S	I	I	T	C	Y	S	N	H	T	C	P	P	C	1	1	1
322	C	P	P	C	D	L	L	K	P	L	P	T	K	L	C	N	R	G	H	E	T	S	I	I	T	C	Y	S	N	H	T	C	P	P	C	1	1	1
323	C	P	P	C	D	L	L	K	P	D	G	L	V	N	C	T	S	D	N	A	T	S	I	I	T	C	Y	S	N	H	T	C	P	P	C	1	1	1
324	C	P	P	C	D	L	L	K	P	A	W	N	A	A	C	P	D	G	L	L	T	S	I	I	T	C	Y	S	N	H	T	C	P	P	C	1	1	1
325	C	P	P	C	D	L	L	K	P	Y	W	P	T	P	C	V	E	G	T	S	T	S	I	I	T	C	Y	S	N	H	T	C	P	P	C	1	1	1
326	C	P	P	C	D	L	L	K	P	F	N	T	S	N	C	G	D	I	N	I	T	S	I	I	T	C	Y	S	N	H	T	C	P	P	C	1	1	1
327	C	P	P	C	D	L	L	K	R	R	F	I	M	Y	C	D	S	R	M	T	T	S	I	I	T	C	Y	S	N	H	T	C	P	P	C	1	1	1
328	C	P	P	C	D	L	L	K	R	D	M	E	R	F	C	R	N	S	S	T	T	S	I	I	T	C	Y	S	N	H	T	C	P	P	C	1	1	1
329	C	P	P	C	D	L	L	K	L	T	N	T	T	K	C	Q	H	K	L	N	T	S	I	I	T	C	Y	S	N	H	T	C	P	P	C	1	1	1
330	C	P	P	C	D	L	L	K	L	T	G	V	A	D	C	R	Q	F	P	*	T	S	I	I	T	C	Y	S	N	H	T	C	P	P	C	1	1	1
331	C	P	P	C	D	L	L	K	L	L	A	H	P	P	C	Y	R	D	W	N	T	S	I	I	T	C	Y	S	N	H	T	C	P	P	C	1	1	1
332	C	P	P	C	D	L	L	K	L	L	P	T	K	L	C	N	R	G	H	E	T	S	I	I	T	C	Y	S	N	H	T	C	P	P	C	1	1	1
333	C	P	P	C	D	L	L	K	L	L	A	P	K	P	C	A	P	G	A	S	P	S	I	I	T	C	Y	S	N	H	T	C	P	P	C	1	1	1
334	C	P	P	C	D	L	L	K	L	E	M	I	T	L	C	Y	L	R	A	T	T	S	I	I	T	C	Y	S	N	H	T	C	P	P	C	1	1	1
335	C	P	P	C	D	L	L	K	L	G	L	R	F	Q	C	D	S	G	T	L	T	S	I	I	T	C	Y	S	N	H	T	C	P	P	C	1	1	1
336	C	P	P	C	D	L	L	K	L	W	F	E	Q	F	C	S	T	P	A	R	T	S	I	I	T	C	Y	S	N	H	T	C	P	P	C	1	1	1
337	C	P	P	C	D	L	L	K	L	L	N	I	W	H	C	N	R	E	L	Y	T	S	I	I	T	C	Y	S	N	H	T	C	P	P	C	1	1	1
338	C	P	P	C	D	L	L	K	L	F	N	T	S	N	C	G	D	I	N	I	T	S	I	I	T	C	Y	S	N	H	T	C	P	P	C	1	1	1
339	C	P	P	C	D	L	L	K	L	K	T	K	F	R	C	G	S	P	S	T	P	S	I	I	T	C	Y	S	N	H	T	C	P	P	C	1	1	1
340	C	P	P	C	D	L	L	K	L	K	T	V	D	D	C	T	E	W	R	T	T	S	S	I	T	C	Y	S	N	H	T	C	P	P	C	1	1	1
341	C	P	P	C	D	L	L	K	L	K	V	E	L	L	C	T	G	P	T	L	T	S	I	I	T	C	Y	S	N	H	T	C	P	P	C	1	1	1
342	C	P	P	C	D	L	L	K	L	K	V	E	L	L	C	T	G	P	T	L	T	P	I	I	T	C	Y	S	N	H	T	C	P	P	C	1	1	1
343	C	P	P	C	D	L	L	K	L	K	V	E	L	L	C	T	G	P	T	L	S	S	I	I	T	C	Y	S	N	H	T	C	P	P	C	1	1	1
344	C	P	P	C	D	L	L	K	L	K	V	E	L	L	C	T	G	P	T	L	T	S	I	I	T	C	Y	S	N	H	T	C	P	P	C	1	1	1
345	C	P	P	C	D	L	L	K	L	K	S	N	R	V	C	L	L	R	G	V	T	S	L	I	T	C	Y	S	N	H	T	C	P	P	C	1	1	1
346	C	P	P	C	D	L	L	K	L	K	L	P	A	R	C	L	A	E	I	N	I	S	I	I	T	C	Y	S	N	H	T	C	P	P	C	1	1	1
347	C	P	P	C	D	L	L	K	L	N	M	L	V	P	C	R	E	T	A	L	T	S	I	I	T	C	Y	S	N	H	T	C	P	P	C	1	1	1
348	C	P	P	C	D	L	L	K	L	N	V	V	E	W	C	W	T	S	Q	R	T	S	I	I	T	C	Y	S	N	H	T	C	P	P	C	1	1	1
349	C	P	P	C	D	L	L	K	L	T	K	Y	H	N	C	T	V	R	W	H	T	S	I	I	T	C	Y	S	N	H	T	C	P	P	C	1	1	1
350	C	P	P	C	D	L	L	K	L	T	S	A	V	N	C	S	Y	V	N	T	T	S	I	I	T	C	Y	S	N	H	T	C	P	P	C	1	1	1
351	C	P	P	C	D	L	L	K	L	T	M	P	P	*	C	V	R	R	T	R	P	S	I	I	T	C	Y	S	N	H	T	C	P	P	C	1	1	1
352	C	P	P	C	D	L	L	K	L	T	H	P	L	Y	C	M	L	R	P	A	T	S	I	I	T	C	Y	S	N	H	T	C	P	P	C	1	1	1
353	C	P	P	C	D	L	L	K	L	T	A	N	S	S	C	E	I	H	F	H	T	S	I	I	T	C	Y	S	N	H	T	C	P	P	C	1	1	1
354	C	P	P	C	D	L	L	K	L	T	V	H	P	I	C	N	L	S	T	D	T	S	I	I	T	C	Y	S	N	H	T	C	P	P	C	1	1	1
355	C	P	P	C	D	L	L	K	L	T	W	K	I	G	C	P	V	G	G	L	T	S	I	I	T	C	Y	S	N	H	N	C	P	P	C	1	1	1
356	C	P	P	C	D	L	L	K	L	T	N	T	T	K	C	Q	H	K	L	N	T	S	I	I	T	C	Y	S	N	H	T	C	P	P	C	1	1	1
357	C	P	P	C	D	L	L	K	L	T	M	K	K	M	C	N	S	E	D	H	T	S	I	I	T	C	Y	S	N	H	T	C	P	P	C	1	1	1
358	C	P	P	C	D	L	L	K	L	T	G	V	A	D	C	R	Q	F	P	*	T	S	I	I	T	C	Y	S	N	H	T	C	P	P	C	1	1	1
359	C	P	P	C	D	L	L	K	L	T	G	V	A	D	C	R	Q	F	P	*	T	S	I	I	T	C	Y	S	N	H	T	C	P	P	C	1	1	1
360	C	P	P	C	D	L	L	K	L	T	G	V	A	D	C	R	Q	F	P	*	T	S	S	I	T	C	Y	S	N	H	T	C	P	P	C	1	1	1
361	C	P	P	C	D	L	L	K	L	T	G	V	A	D	C	R	Q	F	P	*	T	S	I	I	T	C	Y	S	H	H	T	C	P	P	C	1	1	1
362	C	P	P	C	D	L	L	K	L	T	G	V	A	D	C	R	Q	F	P	*	T	S	L	I	T	C	Y	S	N	H	T	C	P	P	C	1	1	1
363	C	P	P	C	D	L	L	K	L	T	G	V	A	D	C	R	Q	F	P	*	S	S	I	I	T	C	Y	S	N	H	T	C	P	P	C	1	1	1
364	C	P	P	C	D	L	L	K	L	T	G	V	A	D	C	R	Q	F	P	Y	T	S	I	I	T	C	Y	S	N	H	T	C	P	P	C	1	1	1
365	C	P	P	C	D	L	L	K	L	T	L	S	Y	R	C	P	G	F	V	E	T	S	I	I	T	C	Y	S	N	H	T	C	P	P	C	1	1	1
366	C	P	P	C	D	L	L	K	L	T	F	A	S	P	C	M	*	F	G	L	T	S	I	I	T	C	Y	S	N	H	T	C	P	P	C	1	1	1
367	C	P	P	C	D	L	L	K	L	R	M	G	D	R	C	R	T	R	L	E	T	S	I	I	T	C	Y	S	N	H	T	C	P	P	C	1	1	1
368	C	P	P	C	D	L	L	K	L	R	L	Y	V	A	C	V	G	V	S	T	T	S	I	I	T	C	Y	S	N	H	T	C	P	P	C	1	1	1
369	C	P	P	C	D	L	L	K	L	R	L	S	F	P	C	V	S	H	P	T	T	S	I	I	T	C	Y	S	N	H	T	C	P	P	C	1	1	1
370	C	P	P	C	D	L	L	K	L	S	P	L	E	N	C	S	A	G	T	P	S	S	I	I	T	C	Y	S	N	H	T	C	P	P	C	1	1	1
371	C	P	P	C	D	L	L	K	L	S	D	R	T	K	C	D	S	S	I	L	T	S	L	I	T	C	Y	S	N	H	T	C	P	P	C	1	1	1
372	C	P	P	C	D	L	L	K	L	S	A	R	W	Y	C	K	S	E	E	L	T	S	I	I	T	C	Y	S	N	H	T	C	P	P	C	1	1	1
373	C	P	P	C	D	L	L	K	L	S	V	R	W	Y	C	K	S	E	E	L	T	S	I	I	T	C	Y	S	N	H	T	C	P	P	C	1	1	1
374	C	P	P	C	D	L	L	K	L	S	V	R	W	Y	C	K	S	E	E	L	T	S	I	I	T	C	Y	S	N	H	T	C	P	P	C	1	1	1
375	C	P	P	C	D	L	L	K	L	S	V	R	W	Y	C	K	S	E	*	L	T	S	I	I	T	C	Y	S	N	H	T	C	P	P	C	1	1	1
376	C	P	P	C	D	L	L	K	L	M	N	G	D	*	C	R	G	T	R	R	T	S	I	I	T	C	Y	S	N	H	T	C	P	P	C	1	1	1
377	C	P	P	C	D	L	L	K	L	M	Q	H	L	P	C	I	G	V	T	E	S	S	I	I	T	C	Y	S	N	H	T	C	P	P	C	1	1	1
378	C	P	P	C	D	L	L	K	L	M	A	N	S	S	C	E	T	H	V	H	T	S	I	I	T	C	Y	S	N	H	T	C	P	P	C	1	1	1
379	C	P	P	C	D	L	L	K	L	M	A	N	S	S	C	E	T	H	F	H	T	S	I	I	T	C	Y	S	N	H	T	C	P	P	C	1	1	1
380	C	P	P	C	D	L	L	K	L	M	A	N	S	S	C	E	I	H	S	H	T	S	I	I	T	C	Y	S	N	H	T	C	P	P	C	1	1	1
381	C	P	P	C	D	L	L	K	L	M	A	N	S	S	C	E	I	H	F	H	T	S	I	I	T	C	Y	S	N	H	T	C	P	P	C	1	1	1
382	C	P	P	C	D	L	L	K	L	M	A	N	S	S	C	E	I	H	F	H	T	S	I	I	T	C	Y	S	N	H	T	C	P	P	C	1	1	1
383	C	P	P	C	D	L	L	K	L	M	A	N	S	S	C	E	I	H	F	H	T	S	I	I	T	C	Y	P	N	H	T	C	P	P	C	1	1	1
384	C	P	P	C	D	L	L	K	L	M	A	N	S	S	C	A	I	H	F	H	T	S	I	I	T	C	Y	S	N	H	T	C	P	P	C	1	1	1
385	C	P	P	C	D	L	L	K	L	M	A	S	S	S	C	E	I	H	F	H	T	S	I	I	T	C	Y	S	N	H	T	C	P	P	C	1	1	1
386	C	P	P	C	D	L	L	K	L	M	G	H	R	G	C	A	D	I	L	L	T	S	I	I	T	C	Y	S	N	H	T	C	P	P	C	1	1	1
387	C	P	P	C	D	L	L	K	L	M	G	E	T	R	C	Q	P	L	E	L	T	S	I	I	T	C	Y	S	N	H	T	C	P	P	C	1	1	1
388	C	P	P	C	D	L	L	K	L	M	G	E	T	R	C	Q	P	L	E	L	T	S	I	N	T	C	Y	S	N	H	T	C	P	P	C	1	1	1
389	C	P	P	C	D	L	L	K	L	M	G	E	T	R	C	Q	P	L	E	L	T	S	I	I	T	C	Y	S	N	H	T	C	P	P	C	1	1	1
390	C	P	P	C	D	L	L	K	L	M	G	E	T	R	C	Q	P	L	E	L	T	S	I	I	T	C	Y	S	N	H	T	C	P	P	C	1	1	1
391	C	P	P	C	D	L	L	K	L	I	M	K	K	M	C	N	S	E	D	H	T	S	I	I	T	C	Y	S	N	H	T	C	P	P	C	1	1	1
392	C	P	P	C	D	L	L	K	L	I	M	K	K	M	C	N	S	E	D	H	T	S	I	I	T	C	Y	P	N	H	T	C	P	P	C	1	1	1
393	C	P	P	C	D	L	L	K	L	I	R	A	S	L	C	V	N	S	L	G	S	S	I	I	T	C	Y	S	N	H	T	C	P	P	C	1	1	1
394	C	P	P	C	D	L	L	K	L	I	G	P	S	P	C	N	D	S	E	L	T	S	I	I	T	C	Y	S	N	H	T	C	P	P	C	1	1	1
395	C	P	P	C	D	L	L	K	L	I	G	P	S	P	C	N	D	S	E	L	T	S	I	I	T	C	Y	S	N	H	T	C	P	P	C	1	1	1
396	C	P	P	C	D	L	L	K	L	I	G	P	S	P	C	N	D	S	E	L	T	S	I	I	T	C	Y	S	N	H	T	C	P	P	C	1	1	1
397	C	P	P	C	D	L	L	K	L	I	G	P	S	P	C	N	D	S	E	L	T	S	I	I	T	C	Y	S	N	H	T	C	P	P	C	1	1	1
398	C	P	P	C	D	L	L	K	L	I	G	P	S	P	C	N	D	S	E	L	T	S	I	I	T	C	Y	S	N	H	T	C	P	P	C	1	1	1
399	C	P	P	C	D	L	L	K	L	I	G	P	S	P	C	N	D	S	E	L	T	S	I	I	T	C	Y	S	N	H	P	C	P	P	C	1	1	1
400	C	P	P	C	D	L	L	K	L	I	G	P	S	P	C	N	D	S	E	L	T	S	I	I	T	C	Y	S	Y	H	T	C	P	P	C	1	1	1
401	C	P	P	C	D	L	L	K	L	I	G	P	S	P	C	N	D	S	E	L	T	S	I	I	R	C	Y	S	N	H	T	C	P	P	C	1	1	1
402	C	P	P	C	D	L	L	K	L	I	G	P	S	P	C	N	D	S	E	L	S	S	I	I	T	C	Y	S	N	H	T	C	P	P	C	1	1	1
403	C	P	P	C	D	L	L	K	L	I	V	L	T	Q	C	P	H	W	R	A	T	S	I	I	T	C	Y	S	N	H	T	C	P	P	C	1	1	1
404	C	P	P	C	D	L	L	K	L	Q	K	R	V	K	C	L	S	N	A	T	T	S	I	I	T	C	Y	S	N	H	T	C	P	P	C	1	1	1
405	C	P	P	C	D	L	L	K	L	Q	K	R	V	E	C	L	S	N	A	T	T	S	I	I	T	C	Y	S	N	H	T	C	P	P	C	1	1	1
406	C	P	P	C	D	L	L	K	L	Q	K	R	V	E	C	L	S	N	A	T	T	P	I	I	T	C	Y	S	N	H	T	C	P	P	C	1	1	1
407	C	P	P	C	D	L	L	K	L	Q	K	R	V	E	C	L	S	N	A	T	T	S	I	I	T	C	Y	S	N	H	T	C	P	P	C	1	1	1
408	C	P	P	C	D	L	L	K	L	Q	I	W	T	A	C	Q	L	P	F	D	P	S	I	I	T	C	Y	S	N	H	T	C	P	P	C	1	1	1
409	C	P	P	C	D	L	L	K	L	Q	A	H	P	P	C	Y	R	D	W	N	T	S	I	I	T	C	Y	S	N	H	T	C	P	P	C	1	1	1
410	C	P	P	C	D	L	L	K	L	H	N	Y	K	E	C	F	H	Q	A	I	T	S	I	I	T	C	Y	S	N	H	T	C	P	P	C	1	1	1
411	C	P	P	C	D	L	L	K	L	H	N	Y	K	E	C	F	Q	Q	A	I	P	S	I	I	T	C	Y	S	N	H	T	C	P	P	C	1	1	1
412	C	P	P	C	D	L	L	K	L	H	I	P	A	W	C	E	A	R	I	R	T	S	I	I	T	C	Y	S	N	H	T	C	P	P	C	1	1	1
413	C	P	P	C	D	L	L	K	L	H	I	R	S	L	C	G	T	L	S	P	T	S	I	I	T	C	Y	S	N	H	T	C	P	P	C	1	1	1
414	C	P	P	C	D	L	L	K	L	H	I	R	V	M	C	S	K	E	G	E	T	S	I	I	T	C	Y	S	N	H	T	C	P	P	C	1	1	1
415	C	P	P	C	D	L	L	K	L	H	I	D	N	S	C	S	I	E	W	D	T	S	I	I	T	C	Y	S	N	H	T	C	P	P	C	1	1	1
416	C	P	P	C	D	L	L	K	L	H	L	P	L	T	C	L	T	S	P	P	T	S	I	I	T	C	Y	S	N	H	T	C	P	P	C	1	1	1
417	C	P	P	C	D	L	L	K	L	H	L	P	L	T	C	L	T	P	P	P	T	S	I	I	T	C	Y	S	N	H	T	C	P	P	C	1	1	1
418	C	P	P	C	D	L	L	K	L	H	L	P	L	T	C	L	T	A	P	P	T	S	I	I	T	C	Y	S	N	H	T	C	P	P	C	1	1	1
419	C	P	P	C	D	L	L	K	L	H	L	P	L	T	C	L	T	S	P	P	T	S	I	I	T	C	Y	S	N	H	T	C	P	P	C	1	1	1
420	C	P	P	C	D	L	L	K	L	H	L	P	L	T	C	L	T	S	P	P	T	S	I	I	T	C	Y	S	N	H	T	C	P	P	C	1	1	1
421	C	P	P	C	D	L	L	K	L	H	L	P	L	T	C	L	T	S	P	P	T	S	I	I	T	C	Y	S	N	H	T	C	P	P	C	1	1	1
422	C	P	P	C	D	L	L	K	L	H	L	P	L	T	C	L	T	S	P	P	T	S	I	T	T	C	Y	S	N	H	T	C	P	P	C	1	1	1
423	C	P	P	C	D	L	L	K	L	H	L	P	L	T	C	L	T	S	P	P	T	S	I	I	T	C	Y	S	N	H	T	C	P	P	C	1	1	1
424	C	P	P	C	D	L	L	K	L	H	L	P	L	T	C	L	T	S	P	P	T	S	I	I	T	C	Y	S	N	H	T	C	P	P	C	1	1	1
425	C	P	P	C	D	L	L	K	L	H	L	P	L	T	C	L	T	S	P	P	T	S	I	I	T	C	Y	S	N	H	T	C	P	P	C	1	1	1
426	C	P	P	C	D	L	L	K	L	H	L	P	L	T	C	L	T	S	P	P	T	S	I	L	T	C	Y	S	N	H	T	C	P	P	C	1	1	1
427	C	P	P	C	D	L	L	K	L	P	M	R	E	L	C	E	L	L	R	R	T	S	I	I	T	C	Y	S	N	H	T	C	P	P	C	1	1	1
428	C	P	P	C	D	L	L	K	L	P	R	H	K	M	C	R	D	D	P	R	T	S	I	I	T	C	Y	S	N	H	T	C	P	P	C	1	1	1
429	C	P	P	C	D	L	L	K	L	P	A	A	E	W	C	Q	I	V	G	T	T	S	I	I	T	C	Y	S	N	H	T	C	P	P	C	1	1	1
430	C	P	P	C	D	L	L	K	L	P	L	F	Q	R	C	P	R	P	A	G	T	S	I	I	T	C	Y	S	N	H	T	C	P	P	C	1	1	1
431	C	P	P	C	D	L	L	K	L	P	P	Q	P	P	C	P	P	S	P	S	T	S	I	I	T	C	Y	S	N	H	T	C	P	P	C	1	1	1
432	C	P	P	C	D	L	L	K	L	P	A	N	T	T	C	R	V	P	N	A	T	P	I	I	T	C	Y	S	N	H	T	C	P	P	C	1	1	1
433	C	P	P	C	D	L	L	K	L	P	A	N	T	T	C	R	V	P	T	A	T	S	I	I	T	C	Y	S	N	H	T	C	P	P	C	1	1	1
434	C	P	P	C	D	L	L	K	L	P	S	R	R	A	C	R	L	R	E	W	T	S	I	I	T	C	Y	S	N	H	T	C	P	P	C	1	1	1
435	C	P	P	C	D	L	L	K	L	P	F	V	V	R	C	H	P	T	W	T	P	S	I	I	T	C	Y	S	N	H	T	C	P	P	C	1	1	1
436	C	P	P	C	D	L	L	K	L	R	R	G	F	S	C	P	P	V	K	T	T	S	I	I	T	C	Y	S	N	H	T	C	P	P	C	1	1	1
437	C	P	P	C	D	L	L	K	L	R	S	E	G	G	C	Q	G	S	N	G	T	S	I	I	T	C	Y	S	N	H	T	C	P	P	C	1	1	1
438	C	P	P	C	D	L	L	K	L	R	M	Q	R	L	C	Q	E	Q	F	R	T	S	S	I	T	C	Y	S	N	H	T	C	P	P	C	1	1	1
439	C	P	P	C	D	L	L	K	L	R	P	V	*	K	C	I	R	K	P	R	T	S	I	I	T	C	Y	S	N	H	T	C	P	P	C	1	1	1
440	C	P	P	C	D	L	L	K	L	R	L	M	L	V	C	T	D	K	N	M	T	S	I	I	T	C	Y	S	N	H	T	C	P	P	C	1	1	1
441	C	P	P	C	D	L	L	K	L	R	V	I	M	Y	C	D	S	R	M	T	T	S	I	I	T	C	Y	S	N	H	T	C	P	P	C	1	1	1
442	C	P	P	C	D	L	L	K	L	R	V	Q	V	E	C	W	G	N	P	V	T	S	I	I	T	C	Y	S	N	H	T	C	P	P	C	1	1	1
443	C	P	P	C	D	L	L	K	L	R	S	I	M	Y	C	D	S	R	M	T	T	S	I	I	T	C	Y	S	N	H	T	C	P	P	C	1	1	1
444	C	P	P	C	D	L	L	K	L	R	F	T	M	Y	C	D	S	R	M	T	T	S	I	I	T	C	Y	S	N	H	T	C	P	P	C	1	1	1
445	C	P	P	C	D	L	L	K	L	R	F	I	M	Y	C	D	S	R	M	T	T	S	I	I	T	C	Y	S	N	H	T	C	P	P	C	1	1	1
446	C	P	P	C	D	L	L	K	L	R	F	I	M	Y	C	D	S	R	M	T	T	P	I	I	T	C	Y	S	N	H	T	C	P	P	C	1	1	1
447	C	P	P	C	D	L	L	K	L	R	F	I	M	Y	C	D	S	R	M	T	T	S	S	I	T	C	Y	S	N	H	T	C	P	P	C	1	1	1
448	C	P	P	C	D	L	L	K	L	R	F	I	M	Y	C	D	S	R	M	T	T	S	I	I	T	C	Y	S	N	L	T	C	P	P	C	1	1	1
449	C	P	P	C	D	L	L	K	L	R	F	I	M	Y	C	D	S	R	M	T	T	S	I	L	T	C	Y	S	N	H	T	C	P	P	C	1	1	1
450	C	P	P	C	D	L	L	K	L	R	F	I	M	Y	C	D	S	R	M	T	S	S	I	I	T	C	Y	S	N	H	T	C	P	P	C	1	1	1
451	C	P	P	C	D	L	L	K	L	R	P	Q	A	T	C	L	Q	R	W	L	T	S	I	I	T	C	Y	S	N	H	T	C	P	P	C	1	1	1
452	C	P	P	C	D	L	L	K	L	R	P	E	A	T	C	L	Q	R	W	R	T	S	I	I	T	C	Y	S	N	H	T	C	P	P	C	1	1	1
453	C	P	P	C	D	L	L	K	L	R	P	E	A	T	C	L	Q	R	W	L	T	P	I	I	T	C	Y	S	N	H	T	C	P	P	C	1	1	1
454	C	P	P	C	D	L	L	K	L	R	P	E	A	T	C	L	Q	R	W	L	T	S	I	I	T	C	Y	S	N	H	T	C	P	P	C	1	1	1
455	C	P	P	C	D	L	L	K	L	R	P	E	A	T	C	L	Q	R	W	L	T	S	I	I	T	C	Y	S	H	H	T	C	P	P	C	1	1	1
456	C	P	P	C	D	L	L	K	L	R	P	E	A	T	C	L	Q	R	W	L	S	S	I	I	T	C	Y	S	N	H	T	C	P	P	C	1	1	1
457	C	P	P	C	D	L	L	K	L	R	D	R	T	G	C	H	T	S	R	F	T	S	I	I	T	C	Y	S	N	H	T	C	P	P	C	1	1	1
458	C	P	P	C	D	L	L	K	L	R	G	I	L	D	C	R	M	V	D	P	P	S	I	I	T	C	Y	S	N	H	T	C	P	P	C	1	1	1
459	C	P	P	C	D	L	L	K	L	L	R	G	S	P	C	S	H	P	G	D	T	S	I	I	T	C	Y	S	N	H	T	C	P	P	C	1	1	1
460	C	P	P	C	D	L	L	K	L	L	P	T	K	L	C	N	R	G	H	E	T	S	I	I	T	C	Y	S	N	H	T	C	P	P	C	1	1	1
461	C	P	P	C	D	L	L	K	L	L	A	P	K	P	C	A	P	G	A	S	T	S	I	I	T	C	Y	S	N	H	T	C	P	P	C	1	1	1
462	C	P	P	C	D	L	L	K	L	L	N	I	W	H	C	N	R	E	L	Y	T	S	I	I	T	C	Y	S	N	H	T	C	P	P	C	1	1	1
463	C	P	P	C	D	L	L	K	L	L	T	H	P	P	C	Y	R	D	W	N	T	S	I	I	T	C	Y	S	N	H	T	C	P	P	C	1	1	1
464	C	P	P	C	D	L	L	K	L	L	P	S	Y	N	C	T	L	E	T	N	P	S	I	I	T	C	Y	S	N	H	T	C	P	P	C	1	1	1
465	C	P	P	C	D	L	L	K	L	L	P	E	R	R	C	S	E	D	V	A	T	S	I	I	T	C	Y	S	N	H	T	C	P	P	C	1	1	1
466	C	P	P	C	D	L	L	K	L	L	P	E	R	R	C	S	E	D	V	A	S	S	I	I	T	C	Y	S	N	H	T	C	P	P	C	1	1	1
467	C	P	P	C	D	L	L	K	L	L	R	R	T	T	C	L	P	T	S	P	T	S	I	I	T	C	Y	S	N	H	T	C	P	P	C	1	1	1
468	C	P	P	C	D	L	L	K	L	L	R	G	T	T	C	L	P	T	S	P	T	P	I	I	T	C	Y	S	N	H	T	C	P	P	C	1	1	1
469	C	P	P	C	D	L	L	K	L	L	R	G	T	T	C	L	P	T	S	P	T	S	S	I	T	C	Y	S	N	H	T	C	P	P	C	1	1	1
470	C	P	P	C	D	L	L	K	L	L	R	G	T	T	C	L	P	T	S	P	T	S	I	I	T	C	Y	S	N	H	T	C	P	P	C	1	1	1
471	C	P	P	C	D	L	L	K	L	L	R	G	T	T	C	L	P	T	S	P	T	S	I	I	T	C	Y	S	N	H	T	C	P	P	C	1	1	1
472	C	P	P	C	D	L	L	K	L	L	R	G	T	T	C	L	P	T	S	P	T	S	I	I	T	C	Y	S	H	H	T	C	P	P	C	1	1	1
473	C	P	P	C	D	L	L	K	L	L	R	G	T	T	C	L	P	T	S	P	T	S	L	I	T	C	Y	S	N	H	T	C	P	P	C	1	1	1
474	C	P	P	C	D	L	L	K	L	L	R	G	T	T	C	L	P	T	S	P	S	S	I	I	T	C	Y	S	N	H	T	C	P	P	C	1	1	1
475	C	P	P	C	D	L	L	K	L	L	R	G	T	T	C	L	P	T	S	P	P	S	I	I	T	C	Y	S	N	H	T	C	P	P	C	1	1	1
476	C	P	P	C	D	L	L	K	L	L	R	G	T	T	C	L	P	T	S	P	S	S	I	I	T	C	Y	S	N	H	T	C	P	P	C	1	1	1
477	C	P	P	C	D	L	L	K	L	L	A	N	P	P	C	Y	R	D	W	N	T	S	I	I	T	C	Y	S	N	H	T	C	P	P	C	1	1	1
478	C	P	P	C	D	L	L	K	L	L	A	H	P	P	C	Y	R	D	W	K	T	S	I	I	T	C	Y	S	N	H	T	C	P	P	C	1	1	1
479	C	P	P	C	D	L	L	K	L	L	A	H	P	P	C	Y	R	D	W	N	T	S	I	I	T	C	Y	S	N	H	T	C	P	P	C	1	1	1
480	C	P	P	C	D	L	L	K	L	L	A	H	P	P	C	Y	R	D	W	N	T	A	I	I	T	C	Y	S	N	H	T	C	P	P	C	1	1	1
481	C	P	P	C	D	L	L	K	L	L	A	H	P	P	C	Y	R	D	W	N	T	S	S	I	T	C	Y	S	N	H	T	C	P	P	C	1	1	1
482	C	P	P	C	D	L	L	K	L	L	A	H	P	P	C	Y	R	D	W	N	T	S	I	T	T	C	Y	S	N	H	T	C	P	P	C	1	1	1
483	C	P	P	C	D	L	L	K	L	L	A	H	P	P	C	Y	R	D	W	N	T	S	I	I	T	C	Y	S	N	H	T	C	P	P	C	1	1	1
484	C	P	P	C	D	L	L	K	L	L	A	H	P	P	C	Y	R	D	W	N	T	S	I	I	T	C	Y	S	N	H	T	C	P	P	C	1	1	1
485	C	P	P	C	D	L	L	K	L	L	A	H	P	P	C	Y	R	D	W	N	T	S	I	I	T	C	Y	S	N	H	T	C	P	P	C	1	1	1
486	C	P	P	C	D	L	L	K	L	L	A	H	P	P	C	Y	R	D	W	N	T	S	I	I	T	C	Y	S	H	H	T	C	P	P	C	1	1	1
487	C	P	P	C	D	L	L	K	L	L	A	H	P	P	C	Y	R	D	W	N	T	S	I	I	T	C	S	S	N	H	T	C	P	P	C	1	1	1
488	C	P	P	C	D	L	L	K	L	L	A	H	P	P	C	Y	R	D	W	N	T	S	I	L	T	C	Y	S	N	H	T	C	P	P	C	1	1	1
489	C	P	P	C	D	L	L	K	L	L	A	H	P	P	C	Y	R	D	W	N	S	S	I	I	T	C	Y	S	N	H	T	C	P	P	C	1	1	1
490	C	P	P	C	D	L	L	K	L	L	A	H	P	P	C	Y	R	D	W	N	S	S	I	I	T	C	Y	S	N	H	T	C	P	P	C	1	1	1
491	C	P	P	C	D	L	L	K	L	L	A	H	P	P	C	Y	R	D	W	T	P	S	I	I	T	C	Y	S	N	H	T	C	P	P	C	1	1	1
492	C	P	P	C	D	L	L	K	L	L	A	H	P	P	C	Y	W	D	W	N	P	S	I	I	T	C	Y	S	N	H	T	C	P	P	C	1	1	1
493	C	P	P	C	D	L	L	K	L	L	A	H	P	P	C	S	R	D	W	T	T	S	I	I	T	C	Y	S	N	H	T	C	P	P	C	1	1	1
494	C	P	P	C	D	L	L	K	L	L	A	H	P	P	C	Y	R	D	W	N	T	S	I	I	T	C	Y	S	N	H	T	C	P	P	C	1	1	1
495	C	P	P	C	D	L	L	K	L	L	G	E	T	R	C	Q	P	L	E	L	T	S	I	I	T	C	Y	S	N	H	T	C	P	P	C	1	1	1
496	C	P	P	C	D	L	L	K	L	L	Y	N	S	F	C	P	P	P	P	A	T	S	I	I	T	C	Y	S	N	H	T	C	P	P	C	1	1	1
497	C	P	P	C	D	L	L	K	L	L	Y	N	S	F	C	P	P	P	P	A	T	A	I	I	T	C	Y	S	N	H	T	C	P	P	C	1	1	1
498	C	P	P	C	D	L	L	K	L	L	Y	N	S	F	C	P	P	P	P	A	T	S	I	T	T	C	Y	S	N	H	T	C	P	P	C	1	1	1
499	C	P	P	C	D	L	L	K	L	L	Y	N	S	F	C	P	P	P	P	A	T	S	I	I	T	C	Y	S	N	H	T	C	P	P	C	1	1	1
500	C	P	P	C	D	L	L	K	L	L	Y	N	S	F	C	P	P	P	P	A	T	S	I	I	T	C	Y	S	N	H	T	C	P	P	C	1	1	1
501	C	P	P	C	D	L	L	K	L	L	Y	N	S	F	C	P	P	P	P	A	S	S	I	I	T	C	Y	S	N	H	T	C	P	P	C	1	1	1
502	C	P	P	C	D	L	L	K	L	L	Y	N	S	F	C	P	P	P	P	A	T	S	I	I	T	C	Y	S	N	H	T	C	P	P	C	1	1	1
503	C	P	P	C	D	L	L	K	L	L	N	N	T	I	C	N	D	I	N	Y	T	S	I	I	T	C	Y	S	N	H	T	C	P	P	C	1	1	1
504	C	P	P	C	D	L	L	K	L	L	R	A	S	P	C	S	H	P	G	D	T	S	I	I	T	C	Y	S	N	H	T	C	P	P	C	1	1	1
505	C	P	P	C	D	L	L	K	L	L	R	G	S	P	C	S	H	P	G	D	T	S	I	I	T	C	Y	S	N	H	T	C	P	P	C	1	1	1
506	C	P	P	C	D	L	L	K	L	L	R	G	S	P	C	S	H	P	G	D	T	S	T	I	T	C	Y	S	N	H	T	C	P	P	C	1	1	1
507	C	P	P	C	D	L	L	K	L	L	R	G	S	P	C	S	H	P	G	D	T	S	I	I	T	C	*	S	N	H	T	C	P	P	C	1	1	1
508	C	P	P	C	D	L	L	K	L	L	R	G	S	P	C	S	H	P	G	D	T	S	I	I	T	C	Y	S	N	H	T	C	P	P	C	1	1	1
509	C	P	P	C	D	L	L	K	L	L	R	G	S	P	C	S	H	P	G	D	T	S	I	I	T	C	Y	P	N	H	T	C	P	P	C	1	1	1
510	C	P	P	C	D	L	L	K	L	L	R	G	S	P	C	S	H	P	G	D	S	S	I	I	T	C	Y	S	N	H	T	C	P	P	C	1	1	1
511	C	P	P	C	D	L	L	K	L	L	I	L	A	E	C	P	G	E	R	V	T	S	I	I	T	C	Y	S	N	H	T	C	P	P	C	1	1	1
512	C	P	P	C	D	L	L	K	L	L	Q	K	G	L	C	G	L	Q	N	R	T	S	I	I	T	C	Y	S	N	H	T	C	P	P	C	1	1	1
513	C	P	P	C	D	L	L	K	L	L	Q	K	G	L	C	G	L	Q	N	R	P	S	I	I	T	C	Y	S	N	H	T	C	P	P	C	1	1	1
514	C	P	P	C	D	L	L	K	L	L	H	P	L	V	C	E	P	P	S	A	T	S	I	I	T	C	Y	S	N	H	T	C	P	P	C	1	1	1
515	C	P	P	C	D	L	L	K	L	L	H	L	R	N	C	T	L	T	G	W	T	S	I	I	T	C	Y	S	N	H	T	C	P	P	C	1	1	1
516	C	P	P	C	D	L	L	K	L	L	H	L	L	V	C	E	P	P	S	A	T	S	I	I	T	C	Y	S	N	H	T	C	P	P	C	1	1	1
517	C	P	P	C	D	L	L	K	L	L	H	L	L	V	C	E	P	P	S	A	T	A	I	I	T	C	Y	S	N	H	T	C	P	P	C	1	1	1
518	C	P	P	C	D	L	L	K	L	L	H	L	L	V	C	E	P	P	S	A	T	S	I	I	T	C	Y	S	N	H	T	C	P	P	C	1	1	1
519	C	P	P	C	D	L	L	K	L	L	H	L	L	V	C	E	P	P	S	A	T	S	I	I	T	C	Y	S	N	H	T	C	P	P	C	1	1	1
520	C	P	P	C	D	L	L	K	L	L	H	L	L	V	C	E	P	P	S	A	T	S	I	I	T	C	H	S	N	H	T	C	P	P	C	1	1	1
521	C	P	P	C	D	L	L	K	L	L	H	L	L	V	C	E	P	P	S	A	T	S	I	I	T	C	Y	S	H	H	T	C	P	P	C	1	1	1
522	C	P	P	C	D	L	L	K	L	L	H	L	L	V	C	E	P	P	S	A	T	S	L	I	T	C	Y	S	N	H	T	C	P	P	C	1	1	1
523	C	P	P	C	D	L	L	K	L	L	H	L	R	N	C	T	L	T	G	W	T	S	I	I	T	C	Y	S	N	H	T	C	P	P	C	1	1	1
524	C	P	P	C	D	L	L	K	L	L	P	T	K	L	C	N	R	G	Q	E	T	S	I	I	T	C	Y	S	N	H	T	C	P	P	C	1	1	1
525	C	P	P	C	D	L	L	K	L	L	P	T	K	L	C	N	R	G	H	E	T	P	I	I	T	C	Y	S	N	H	T	C	P	P	C	1	1	1
526	C	P	P	C	D	L	L	K	L	L	P	T	K	L	C	N	R	G	H	E	T	S	I	I	T	C	Y	S	N	H	T	C	P	P	C	1	1	1
527	C	P	P	C	D	L	L	K	L	L	P	T	K	L	C	N	R	G	H	E	T	S	I	T	T	C	Y	S	N	H	T	C	P	P	C	1	1	1
528	C	P	P	C	D	L	L	K	L	L	P	T	K	L	C	N	R	G	H	E	T	S	I	I	T	C	Y	S	N	H	T	C	P	P	C	1	1	1
529	C	P	P	C	D	L	L	K	L	L	P	T	K	L	C	N	R	G	H	E	T	S	I	I	T	C	Y	S	N	H	T	C	P	P	C	1	1	1
530	C	P	P	C	D	L	L	K	L	L	P	T	K	L	C	N	R	G	H	E	T	S	I	I	T	C	Y	P	N	H	T	C	P	P	C	1	1	1
531	C	P	P	C	D	L	L	K	L	L	P	T	K	L	C	N	R	G	H	E	T	S	I	I	T	C	Y	S	N	H	T	C	P	P	C	1	1	1
532	C	P	P	C	D	L	L	K	L	L	P	T	K	L	C	N	R	G	H	E	T	S	I	I	T	C	Y	S	N	H	T	C	P	P	C	1	1	1
533	C	P	P	C	D	L	L	K	L	L	P	T	K	L	C	N	R	G	H	E	T	S	I	I	T	C	Y	S	N	H	P	C	P	P	C	1	1	1
534	C	P	P	C	D	L	L	K	L	L	P	T	K	L	C	N	R	G	H	E	T	S	I	I	T	C	Y	S	H	H	T	C	P	P	C	1	1	1
535	C	P	P	C	D	L	L	K	L	L	P	T	K	L	C	N	R	G	H	E	T	S	L	I	T	C	Y	S	N	H	T	C	P	P	C	1	1	1
536	C	P	P	C	D	L	L	K	L	L	P	T	K	L	C	N	R	G	H	E	T	S	V	I	T	C	Y	S	N	H	T	C	P	P	C	1	1	1
537	C	P	P	C	D	L	L	K	L	L	P	T	K	L	C	N	R	G	H	E	T	S	F	I	T	C	Y	S	N	H	T	C	P	P	C	1	1	1
538	C	P	P	C	D	L	L	K	L	L	P	T	K	L	C	N	R	G	H	E	S	S	I	I	T	C	Y	S	H	H	T	C	P	P	C	1	1	1
539	C	P	P	C	D	L	L	K	L	L	P	T	K	L	C	N	R	G	H	E	S	S	I	I	T	C	Y	S	N	H	T	C	P	P	C	1	1	1
540	C	P	P	C	D	L	L	K	L	L	P	T	E	L	C	N	R	G	H	E	T	S	I	I	T	C	Y	S	N	H	T	C	P	P	C	1	1	1
541	C	P	P	C	D	L	L	K	L	L	P	T	*	L	C	N	R	G	H	E	T	S	I	I	T	C	Y	S	N	H	T	C	P	P	C	1	1	1
542	C	P	P	C	D	L	L	K	L	L	P	V	R	R	C	V	L	E	L	T	T	S	I	I	T	C	Y	S	N	H	T	C	P	P	C	1	1	1
543	C	P	P	C	D	L	L	K	L	L	L	S	L	S	C	P	N	E	H	Y	T	S	I	I	T	C	Y	S	N	H	T	C	P	P	C	1	1	1
544	C	P	P	C	D	L	L	K	L	L	A	P	K	P	C	A	P	G	A	S	S	S	I	I	T	C	Y	S	N	H	T	C	P	P	C	1	1	1
545	C	P	P	C	D	L	L	K	L	L	A	P	K	P	C	A	P	G	A	S	T	S	T	I	T	C	Y	S	N	H	T	C	P	P	C	1	1	1
546	C	P	P	C	D	L	L	K	L	L	A	P	K	P	C	A	P	G	A	S	T	S	S	I	T	C	Y	S	N	H	T	C	P	P	C	1	1	1
547	C	P	P	C	D	L	L	K	L	L	A	P	K	P	C	A	P	G	A	S	T	S	I	I	T	C	Y	S	N	H	T	C	P	P	C	1	1	1
548	C	P	P	C	D	L	L	K	L	L	A	P	K	P	C	A	P	G	A	S	T	S	I	I	T	C	Y	S	N	H	T	C	P	P	C	1	1	1
549	C	P	P	C	D	L	L	K	L	L	A	P	K	P	C	A	P	G	A	S	S	S	I	I	T	C	Y	S	N	H	T	C	P	P	C	1	1	1
550	C	P	P	C	D	L	L	K	L	L	A	P	K	P	C	A	P	W	A	S	T	S	I	I	T	C	Y	S	N	H	T	C	P	P	C	1	1	1
551	C	P	P	C	D	L	L	K	L	L	G	P	S	P	C	N	D	S	E	L	T	S	I	I	T	C	Y	S	N	H	T	C	P	P	C	1	1	1
552	C	P	P	C	D	L	L	K	L	L	V	T	P	S	C	I	N	S	M	K	T	S	I	N	T	C	Y	S	N	H	T	C	P	P	C	1	1	1
553	C	P	P	C	D	L	L	K	L	L	V	L	V	P	C	G	A	L	A	P	T	S	I	I	T	C	Y	S	N	H	T	C	P	P	C	1	1	1
554	C	P	P	C	D	L	L	K	L	L	V	L	V	L	C	G	A	P	A	P	T	S	I	I	T	C	Y	S	N	H	T	C	P	P	C	1	1	1
555	C	P	P	C	D	L	L	K	L	L	V	L	V	L	C	G	A	L	A	P	T	S	I	I	T	C	Y	S	N	H	T	C	P	P	C	1	1	1
556	C	P	P	C	D	L	L	K	L	L	V	L	V	L	C	G	A	L	A	P	T	S	I	I	T	C	H	S	N	H	T	C	P	P	C	1	1	1
557	C	P	P	C	D	L	L	K	L	L	V	L	V	L	C	G	A	L	A	P	T	S	I	I	T	C	Y	S	N	H	T	C	P	P	C	1	1	1
558	C	P	P	C	D	L	L	K	L	L	S	A	L	N	C	A	T	S	T	P	T	S	I	I	T	C	Y	S	N	H	T	C	P	P	C	1	1	1
559	C	P	P	C	D	L	L	K	L	E	R	N	F	E	C	Q	H	I	L	N	P	S	I	I	T	C	Y	S	N	H	T	C	P	P	C	1	1	1
560	C	P	P	C	D	L	L	K	L	E	L	K	T	S	C	G	E	K	N	P	T	S	I	I	T	C	Y	S	N	H	T	C	P	P	C	1	1	1
561	C	P	P	C	D	L	L	K	L	E	L	S	S	S	C	S	V	H	I	H	T	S	I	I	T	C	Y	S	N	H	T	C	P	P	C	1	1	1
562	C	P	P	C	D	L	L	K	L	D	N	E	T	F	C	D	L	L	R	V	T	S	I	I	T	C	Y	S	N	H	T	C	P	P	C	1	1	1
563	C	P	P	C	D	L	L	K	L	D	R	V	N	S	C	L	P	I	L	V	A	S	I	I	T	C	Y	S	N	H	T	C	P	P	C	1	1	1
564	C	P	P	C	D	L	L	K	L	D	G	L	V	N	C	T	S	D	N	A	T	S	I	I	T	C	Y	S	H	H	T	C	P	P	C	1	1	1
565	C	P	P	C	D	L	L	K	L	D	G	L	V	N	C	T	S	D	N	A	P	S	I	I	T	C	Y	S	N	H	T	C	P	P	C	1	1	1
566	C	P	P	C	D	L	L	K	L	A	G	N	N	R	C	H	I	N	V	S	T	S	I	I	T	C	Y	S	N	H	T	C	P	P	C	1	1	1
567	C	P	P	C	D	L	L	K	L	A	G	N	N	L	C	H	I	N	V	S	T	S	S	I	T	C	Y	S	N	H	T	C	P	P	C	1	1	1
568	C	P	P	C	D	L	L	K	L	A	G	N	N	L	C	H	I	N	V	S	P	S	I	I	T	C	Y	S	N	H	T	C	P	P	C	1	1	1
569	C	P	P	C	D	L	L	K	L	A	V	T	T	D	C	L	P	L	N	Y	T	S	I	I	T	C	Y	S	N	H	T	C	P	P	C	1	1	1
570	C	P	P	C	D	L	L	K	L	A	V	T	I	D	C	L	P	L	N	Y	T	S	I	I	T	C	Y	S	N	H	T	C	P	P	C	1	1	1
571	C	P	P	C	D	L	L	K	L	A	V	T	I	D	C	L	P	L	T	Y	T	S	I	I	T	C	Y	S	N	H	T	C	P	P	C	1	1	1
572	C	P	P	C	D	L	L	K	L	A	V	T	G	G	C	D	R	G	I	V	T	S	S	I	T	C	Y	S	N	H	T	C	P	P	C	1	1	1
573	C	P	P	C	D	L	L	K	L	A	V	T	G	G	C	D	R	G	I	V	T	S	I	F	T	C	Y	S	N	H	T	C	P	P	C	1	1	1
574	C	P	P	C	D	L	L	K	L	A	V	T	G	G	C	D	R	G	L	V	T	S	I	I	T	C	Y	S	N	H	T	C	P	P	C	1	1	1
575	C	P	P	C	D	L	L	K	L	A	V	S	I	D	C	L	P	L	N	Y	T	S	I	I	T	C	Y	S	N	H	T	C	P	P	C	1	1	1
576	C	P	P	C	D	L	L	K	L	A	W	N	A	A	C	P	D	G	L	L	T	S	I	I	T	C	Y	S	N	H	T	C	P	P	C	1	1	1
577	C	P	P	C	D	L	L	K	L	A	W	N	A	A	C	P	D	G	L	L	T	S	I	I	T	C	Y	S	N	H	T	C	P	P	C	1	1	1
578	C	P	P	C	D	L	L	K	L	A	W	N	A	A	C	P	D	G	L	L	T	S	I	I	T	C	Y	S	N	H	T	C	P	P	C	1	1	1
579	C	P	P	C	D	L	L	K	L	A	W	N	A	A	C	P	D	G	L	L	T	S	I	I	T	C	Y	S	N	L	T	C	P	P	C	1	1	1
580	C	P	P	C	D	L	L	K	L	A	W	N	A	A	C	P	D	G	L	L	T	S	I	I	T	C	Y	S	S	H	T	C	P	P	C	1	1	1
581	C	P	P	C	D	L	L	K	L	A	W	N	A	A	C	P	D	G	L	L	T	S	I	I	R	C	Y	S	N	H	T	C	P	P	C	1	1	1
582	C	P	P	C	D	L	L	K	L	A	W	N	V	A	C	P	D	G	L	L	T	S	I	I	T	C	Y	S	N	H	T	C	P	P	C	1	1	1
583	C	P	P	C	D	L	L	K	L	A	W	T	A	A	C	P	D	G	L	L	T	S	I	I	T	C	Y	S	N	H	T	C	P	P	C	1	1	1
584	C	P	P	C	D	L	L	K	L	A	W	Q	P	R	C	P	I	I	V	H	T	S	I	I	T	C	Y	S	N	H	T	C	P	P	C	1	1	1
585	C	P	P	C	D	L	L	K	L	A	W	V	L	M	C	W	R	A	G	P	T	S	I	I	T	C	Y	S	N	H	T	C	P	P	C	1	1	1
586	C	P	P	C	D	L	L	K	L	A	F	T	N	G	C	I	A	V	A	P	T	S	I	I	T	C	Y	S	N	H	T	C	P	P	C	1	1	1
587	C	P	P	C	D	L	L	K	L	A	F	S	R	P	C	Q	D	T	V	M	T	S	I	I	T	C	Y	S	N	H	T	C	P	P	C	1	1	1
588	C	P	P	C	D	L	L	K	L	A	L	L	L	L	C	T	P	E	M	P	T	S	I	I	T	C	Y	S	N	H	T	C	P	P	C	1	1	1
589	C	P	P	C	D	L	L	K	L	A	L	V	L	L	C	T	P	E	M	P	T	S	I	I	T	C	Y	S	N	H	T	C	P	P	C	1	1	1
590	C	P	P	C	D	L	L	K	L	A	L	V	L	L	C	T	P	E	M	P	T	S	I	I	T	C	Y	S	N	H	T	C	P	P	C	1	1	1
591	C	P	P	C	D	L	L	K	L	A	L	V	L	L	C	T	P	E	M	P	T	S	I	I	T	C	Y	S	N	H	T	C	P	P	C	1	1	1
592	C	P	P	C	D	L	L	K	L	A	L	V	L	L	C	T	P	E	M	P	T	S	L	I	T	C	Y	S	N	H	T	C	P	P	C	1	1	1
593	C	P	P	C	D	L	L	K	L	A	A	L	F	H	C	R	S	L	L	D	T	S	I	I	T	C	Y	S	N	H	T	C	P	P	C	1	1	1
594	C	P	P	C	D	L	L	K	L	A	G	V	A	D	C	R	Q	F	P	*	T	S	I	I	T	C	Y	S	N	H	T	C	P	P	C	1	1	1
595	C	P	P	C	D	L	L	K	L	A	Y	P	E	G	C	L	S	N	L	V	T	S	I	I	T	C	Y	F	N	H	T	C	P	P	C	1	1	1
596	C	P	P	C	D	L	L	K	L	A	Y	P	E	G	C	L	S	N	L	V	A	S	I	I	T	C	Y	S	N	H	T	C	P	P	C	1	1	1
597	C	P	P	C	D	L	L	K	L	A	Y	A	S	V	C	G	F	S	E	L	T	S	I	I	T	C	Y	S	N	H	T	C	P	P	C	1	1	1
598	C	P	P	C	D	L	L	K	L	A	L	I	N	R	C	L	G	L	A	N	T	S	I	I	T	C	Y	S	N	H	T	C	P	P	C	1	1	1
599	C	P	P	C	D	L	L	K	L	G	N	*	Y	V	C	L	E	Q	P	D	T	S	I	I	T	C	Y	S	N	H	T	C	P	P	C	1	1	1
600	C	P	P	C	D	L	L	K	L	G	N	W	Y	A	C	L	E	Q	P	D	T	S	I	I	T	C	Y	S	N	H	T	C	P	P	C	1	1	1
601	C	P	P	C	D	L	L	K	L	G	N	W	Y	V	C	L	E	Q	P	D	T	S	I	I	T	C	Y	S	N	H	T	C	P	P	C	1	1	1
602	C	P	P	C	D	L	L	K	L	G	N	W	Y	V	C	L	E	Q	P	D	S	S	I	I	T	C	Y	S	N	H	T	C	P	P	C	1	1	1
603	C	P	P	C	D	L	L	K	L	G	T	W	Y	V	C	L	E	Q	P	D	T	S	L	I	T	C	Y	S	N	H	T	C	P	P	C	1	1	1
604	C	P	P	C	D	L	L	K	L	G	T	W	S	V	C	L	E	Q	P	D	T	S	I	I	K	C	Y	S	N	H	T	C	P	P	C	1	1	1
605	C	P	P	C	D	L	L	K	L	G	G	G	A	V	C	E	A	S	E	W	S	S	I	I	T	C	Y	S	N	H	T	C	P	P	C	1	1	1
606	C	P	P	C	D	L	L	K	L	G	S	R	R	Y	C	P	V	G	*	R	P	S	I	I	T	C	Y	S	N	H	T	C	P	P	C	1	1	1
607	C	P	P	C	D	L	L	K	L	G	L	R	F	Q	C	D	S	G	T	L	T	S	I	I	T	C	Y	S	H	H	T	C	P	P	C	1	1	1
608	C	P	P	C	D	L	L	K	L	G	L	R	F	Q	C	D	S	G	T	L	P	S	I	I	T	C	Y	S	N	H	T	C	P	P	C	1	1	1
609	C	P	P	C	D	L	L	K	L	G	L	D	E	T	C	A	L	P	A	H	T	S	I	I	T	C	Y	S	N	H	T	C	P	P	C	1	1	1
610	C	P	P	C	D	L	L	K	L	G	L	D	A	M	C	L	R	R	D	R	T	S	I	I	T	C	Y	S	N	H	T	C	P	P	C	1	1	1
611	C	P	P	C	D	L	L	K	L	V	K	Q	W	G	C	T	D	I	V	M	T	S	I	I	T	C	Y	S	H	H	T	C	P	P	C	1	1	1
612	C	P	P	C	D	L	L	K	L	V	N	L	H	R	C	Q	T	I	A	Y	T	S	I	I	T	C	Y	S	N	H	T	C	P	P	C	1	1	1
613	C	P	P	C	D	L	L	K	L	V	M	V	A	F	C	P	P	G	E	D	T	S	I	I	K	C	Y	S	N	H	T	C	P	P	C	1	1	1
614	C	P	P	C	D	L	L	K	L	V	Q	M	L	T	C	L	F	I	T	A	T	S	I	I	T	C	Y	S	N	H	T	C	P	P	C	1	1	1
615	C	P	P	C	D	L	L	K	L	V	H	A	K	W	C	S	T	P	Q	R	T	S	I	I	T	C	Y	S	N	H	T	C	P	P	C	1	1	1
616	C	P	P	C	D	L	L	K	L	V	H	A	K	W	C	S	T	P	Q	L	T	S	I	I	T	C	Y	S	N	H	T	C	P	P	C	1	1	1
617	C	P	P	C	D	L	L	K	L	V	P	H	R	G	C	S	G	D	T	V	T	S	I	I	T	C	Y	S	N	H	T	C	P	P	C	1	1	1
618	C	P	P	C	D	L	L	K	L	V	S	A	G	R	C	P	Y	P	T	P	T	S	I	I	T	C	Y	S	N	H	T	C	P	P	C	1	1	1
619	C	P	P	C	D	L	L	K	L	V	S	A	G	R	C	P	Y	P	T	P	T	S	I	I	T	C	Y	S	N	H	T	C	P	P	C	1	1	1
620	C	P	P	C	D	L	L	K	L	V	A	H	H	R	C	Y	S	R	V	Y	T	S	I	I	T	C	Y	S	N	H	T	C	P	P	C	1	1	1
621	C	P	P	C	D	L	L	K	L	V	G	S	D	L	C	F	A	L	D	W	T	S	I	I	T	C	Y	S	N	H	T	C	P	P	C	1	1	1
622	C	P	P	C	D	L	L	K	L	V	V	P	L	T	C	G	W	G	Y	G	T	S	I	I	T	C	Y	S	N	H	T	C	P	P	C	1	1	1
623	C	P	P	C	D	L	L	K	L	V	S	Q	P	A	C	G	P	L	S	L	I	S	I	I	T	C	Y	S	N	H	T	C	P	P	C	1	1	1
624	C	P	P	C	D	L	L	K	L	*	H	P	A	G	C	P	R	L	*	G	T	S	I	I	T	C	Y	S	N	H	T	C	P	P	C	1	1	1
625	C	P	P	C	D	L	L	K	L	*	Y	N	S	E	C	T	F	S	P	Q	T	S	I	T	T	C	Y	S	N	H	T	C	P	P	C	1	1	1
626	C	P	P	C	D	L	L	K	L	Y	T	D	N	S	C	S	I	E	W	D	T	S	I	I	T	C	Y	S	N	H	T	C	P	P	C	1	1	1
627	C	P	P	C	D	L	L	K	L	Y	S	S	R	D	C	V	M	A	S	T	T	S	I	I	T	C	Y	S	N	H	T	C	P	P	C	1	1	1
628	C	P	P	C	D	L	L	K	L	Y	V	E	N	Y	C	W	W	E	K	G	P	S	I	I	T	C	Y	S	N	H	T	C	P	P	C	1	1	1
629	C	P	P	C	D	L	L	K	L	Y	W	P	T	P	C	V	E	G	T	S	T	S	I	I	T	C	Y	P	N	H	T	C	P	P	C	1	1	1
630	C	P	P	C	D	L	L	K	L	Y	W	P	T	P	C	V	E	G	T	S	T	S	L	I	T	C	Y	S	N	H	T	C	P	P	C	1	1	1
631	C	P	P	C	D	L	L	K	L	Y	W	P	T	P	C	V	E	G	T	S	P	S	I	I	T	C	Y	S	N	H	T	C	P	P	C	1	1	1
632	C	P	P	C	D	L	L	K	L	S	I	D	V	D	C	T	V	W	R	Y	T	S	I	I	T	C	Y	S	N	H	T	C	P	P	C	1	1	1
633	C	P	P	C	D	L	L	K	L	S	P	R	A	G	C	R	R	P	R	I	T	S	I	I	T	C	Y	S	N	H	T	C	P	P	C	1	1	1
634	C	P	P	C	D	L	L	K	L	S	E	W	K	L	C	R	G	H	S	V	P	S	I	I	T	C	Y	S	N	H	T	C	P	P	C	1	1	1
635	C	P	P	C	D	L	L	K	L	S	A	W	F	A	C	L	Q	P	P	L	T	S	I	I	T	C	Y	S	N	H	T	C	P	P	C	1	1	1
636	C	P	P	C	D	L	L	K	L	S	S	T	R	E	C	L	H	G	S	K	T	S	I	I	T	C	Y	S	N	H	T	C	P	P	C	1	1	1
637	C	P	P	C	D	L	L	K	L	S	F	R	H	V	C	Q	D	S	Y	V	T	S	T	I	T	C	Y	S	N	H	T	C	P	P	C	1	1	1
638	C	P	P	C	D	L	L	K	L	S	F	R	H	V	C	Q	D	S	Y	V	T	S	S	I	T	C	Y	S	N	H	T	C	P	P	C	1	1	1
639	C	P	P	C	D	L	L	K	L	S	F	R	H	V	C	Q	D	S	Y	V	T	S	I	T	T	C	Y	S	N	H	T	C	P	P	C	1	1	1
640	C	P	P	C	D	L	L	K	L	S	F	R	H	V	C	Q	D	S	Y	V	T	S	I	I	T	C	Y	S	N	H	T	C	P	P	C	1	1	1
641	C	P	P	C	D	L	L	K	L	S	F	R	H	V	C	Q	D	S	Y	V	T	S	L	I	T	C	Y	S	N	H	T	C	P	P	C	1	1	1
642	C	P	P	C	D	L	L	K	L	S	F	R	H	V	C	Q	D	S	Y	V	S	S	I	I	T	C	Y	S	N	H	T	C	P	P	C	1	1	1
643	C	P	P	C	D	L	L	K	L	S	T	S	L	R	C	Q	W	W	P	G	T	S	I	I	T	C	Y	S	N	H	T	C	P	P	C	1	1	1
644	C	P	P	C	D	L	L	K	L	S	T	S	L	R	C	Q	W	W	P	G	T	S	S	I	T	C	Y	S	N	H	T	C	P	P	C	1	1	1
645	C	P	P	C	D	L	L	K	L	S	T	S	L	R	C	Q	W	W	P	G	S	S	I	I	T	C	Y	S	N	H	T	C	P	P	C	1	1	1
646	C	P	P	C	D	L	L	K	L	S	T	S	L	R	C	Q	W	W	P	G	S	S	L	I	T	C	Y	S	N	H	T	C	P	P	C	1	1	1
647	C	P	P	C	D	L	L	K	L	S	T	S	L	R	C	Q	W	W	P	G	P	S	I	L	T	C	Y	S	N	H	T	C	P	P	C	1	1	1
648	C	P	P	C	D	L	L	K	L	S	L	K	S	L	C	A	R	T	P	R	T	S	I	I	T	C	Y	S	N	H	T	C	P	P	C	1	1	1
649	C	P	P	C	D	L	L	K	L	S	V	R	G	M	C	L	H	M	V	H	T	S	L	I	T	C	Y	S	N	H	T	C	P	P	C	1	1	1
650	C	P	P	C	D	L	L	K	L	W	S	V	S	T	C	Y	*	T	W	R	T	S	I	I	T	C	Y	S	N	H	T	C	P	P	C	1	1	1
651	C	P	P	C	D	L	L	K	L	W	L	R	T	N	C	R	G	T	Y	H	T	S	I	I	T	C	Y	S	N	H	T	C	P	P	C	1	1	1
652	C	P	P	C	D	L	L	K	L	W	V	Q	D	Y	C	F	G	E	H	L	T	S	I	I	T	C	Y	P	N	H	T	C	P	P	C	1	1	1
653	C	P	P	C	D	L	L	K	L	W	S	K	S	R	C	E	E	L	G	R	T	S	I	I	T	C	Y	S	N	H	T	C	P	P	C	1	1	1
654	C	P	P	C	D	L	L	K	L	F	N	T	S	N	C	G	D	I	N	I	T	S	I	I	T	C	Y	S	N	H	T	C	P	P	C	1	1	1
655	C	P	P	C	D	L	L	K	L	L	K	I	M	P	C	D	T	Q	S	R	T	S	I	I	T	C	Y	S	N	H	T	C	P	P	C	1	1	1
656	C	P	P	C	D	L	L	K	L	L	K	I	V	P	C	D	T	Q	S	R	T	S	I	I	T	C	Y	S	N	H	T	C	P	P	C	1	1	1
657	C	P	P	C	D	L	L	K	L	L	K	I	V	P	C	D	T	Q	S	R	T	S	I	I	T	C	Y	S	N	H	T	C	P	P	C	1	1	1
658	C	P	P	C	D	L	L	K	L	L	K	I	V	P	C	D	T	Q	S	R	P	S	I	I	T	C	Y	S	N	H	T	C	P	P	C	1	1	1
659	C	P	P	C	D	L	L	K	L	L	N	S	W	H	C	N	R	E	L	Y	T	S	I	I	T	C	Y	S	N	H	T	C	P	P	C	1	1	1
660	C	P	P	C	D	L	L	K	L	L	N	I	W	H	C	N	R	E	L	Y	T	S	I	I	T	C	Y	S	N	H	T	C	P	P	C	1	1	1
661	C	P	P	C	D	L	L	K	L	L	N	I	W	H	C	N	R	E	P	Y	T	S	I	I	T	C	Y	S	N	H	T	C	P	P	C	1	1	1
662	C	P	P	C	D	L	L	K	L	L	N	I	W	H	C	N	R	E	L	Y	T	S	I	I	T	C	Y	S	N	H	T	C	P	P	C	1	1	1
663	C	P	P	C	D	L	L	K	L	L	N	I	W	H	C	N	R	E	L	Y	T	A	I	I	T	C	Y	S	N	H	T	C	P	P	C	1	1	1
664	C	P	P	C	D	L	L	K	L	L	N	I	W	H	C	N	R	E	L	Y	T	S	I	T	T	C	Y	S	N	H	T	C	P	P	C	1	1	1
665	C	P	P	C	D	L	L	K	L	L	N	I	W	H	C	N	R	E	L	Y	T	S	I	I	T	C	Y	P	N	H	T	C	P	P	C	1	1	1
666	C	P	P	C	D	L	L	K	L	L	N	I	W	H	C	N	R	E	L	Y	T	S	I	I	T	C	Y	S	N	H	T	C	P	P	C	1	1	1
667	C	P	P	C	D	L	L	K	L	L	N	I	W	H	C	N	R	E	L	Y	T	S	I	I	T	C	Y	S	N	H	T	C	P	P	C	1	1	1
668	C	P	P	C	D	L	L	K	L	L	N	I	W	H	C	N	R	E	L	Y	T	S	I	I	T	C	Y	S	N	H	A	C	P	P	C	1	1	1
669	C	P	P	C	D	L	L	K	L	L	N	I	W	H	C	N	R	E	L	Y	T	S	I	I	T	C	Y	S	H	H	T	C	P	P	C	1	1	1
670	C	P	P	C	D	L	L	K	L	L	N	I	W	H	C	N	R	E	L	Y	T	S	L	I	T	C	Y	S	N	H	T	C	P	P	C	1	1	1
671	C	P	P	C	D	L	L	K	L	L	N	I	W	H	C	N	R	E	L	Y	T	S	L	I	T	C	Y	S	T	H	T	C	P	P	C	1	1	1
672	C	P	P	C	D	L	L	K	L	L	N	I	W	H	C	N	R	V	L	Y	T	S	I	I	T	C	Y	S	N	H	T	C	P	P	C	1	1	1
673	C	P	P	C	D	L	L	K	L	L	N	I	W	H	C	H	R	E	L	S	T	S	I	I	T	C	Y	S	N	H	T	C	P	P	C	1	1	1
674	C	P	P	C	D	L	L	K	L	L	N	E	T	R	C	L	H	R	E	L	T	S	I	I	T	C	Y	S	N	H	T	C	P	P	C	1	1	1
675	C	P	P	C	D	L	L	K	L	L	N	E	T	R	C	L	H	R	E	L	A	S	I	I	T	C	Y	S	N	H	T	C	P	P	C	1	1	1
676	C	P	P	C	D	L	L	K	L	L	N	F	W	H	C	N	R	E	L	Y	T	S	I	I	T	C	Y	S	N	H	T	C	P	P	C	1	1	1
677	C	P	P	C	D	L	L	K	L	L	R	F	M	P	C	T	E	R	P	N	T	S	I	I	T	C	Y	S	N	H	T	C	P	P	C	1	1	1
678	C	P	P	C	D	L	L	K	L	L	L	Q	T	H	C	E	L	R	G	P	T	S	I	I	T	C	Y	S	N	H	T	C	P	P	C	1	1	1
679	C	P	P	C	D	L	L	K	L	L	L	Q	T	H	C	E	L	R	G	P	T	S	I	I	T	C	Y	S	N	H	T	C	P	P	C	1	1	1
680	C	P	P	C	D	L	L	K	L	L	L	Q	T	H	C	E	L	R	G	P	T	S	I	I	T	C	Y	S	N	H	T	C	P	P	C	1	1	1
681	C	P	P	C	D	L	L	K	L	L	L	Q	T	H	C	E	L	R	A	P	T	S	I	I	T	C	Y	S	N	H	T	C	P	P	C	1	1	1
682	C	P	P	C	D	L	L	K	L	L	L	Q	T	H	C	E	L	R	G	P	T	S	I	I	T	C	Y	S	N	H	T	C	P	P	C	1	1	1
683	C	P	P	C	D	L	L	K	L	L	L	Q	T	H	C	E	L	R	G	P	T	A	I	I	T	C	Y	S	N	H	T	C	P	P	C	1	1	1
684	C	P	P	C	D	L	L	K	L	L	L	Q	T	H	C	E	L	R	G	P	T	S	T	I	T	C	Y	S	N	H	T	C	P	P	C	1	1	1
685	C	P	P	C	D	L	L	K	L	L	L	Q	T	H	C	E	L	R	G	P	T	S	I	I	T	C	Y	S	N	H	T	C	P	P	C	1	1	1
686	C	P	P	C	D	L	L	K	L	L	L	Q	T	H	C	E	L	R	G	P	T	S	I	N	T	C	Y	S	N	H	T	C	P	P	C	1	1	1
687	C	P	P	C	D	L	L	K	L	L	L	Q	T	H	C	E	L	R	G	P	T	S	I	T	T	C	Y	S	N	H	T	C	P	P	C	1	1	1
688	C	P	P	C	D	L	L	K	L	L	L	Q	T	H	C	E	L	R	G	P	T	S	I	I	T	C	Y	S	N	H	T	C	P	P	C	1	1	1
689	C	P	P	C	D	L	L	K	L	L	L	Q	T	H	C	E	L	R	G	P	T	S	I	I	T	C	Y	S	N	H	T	C	P	P	C	1	1	1
690	C	P	P	C	D	L	L	K	L	L	L	Q	T	H	C	E	L	R	G	P	T	S	I	I	T	C	H	S	N	H	T	C	P	P	C	1	1	1
691	C	P	P	C	D	L	L	K	L	L	L	Q	T	H	C	E	L	R	G	P	T	S	I	I	T	C	Y	S	N	H	T	C	P	P	C	1	1	1
692	C	P	P	C	D	L	L	K	L	L	L	Q	T	H	C	E	L	R	G	P	T	S	I	I	T	C	Y	S	N	H	T	C	P	P	C	1	1	1
693	C	P	P	C	D	L	L	K	L	L	L	Q	T	H	C	E	L	R	G	P	T	S	I	I	T	C	Y	S	H	H	T	C	P	P	C	1	1	1
694	C	P	P	C	D	L	L	K	L	L	L	Q	T	H	C	E	L	R	G	P	T	S	I	I	T	C	F	S	N	H	T	C	P	P	C	1	1	1
695	C	P	P	C	D	L	L	K	L	L	L	Q	T	H	C	E	L	R	G	P	T	S	I	I	R	C	Y	S	N	H	T	C	P	P	C	1	1	1
696	C	P	P	C	D	L	L	K	L	L	L	Q	T	H	C	E	L	R	G	P	T	S	I	L	T	C	Y	S	N	H	T	C	P	P	C	1	1	1
697	C	P	P	C	D	L	L	K	L	L	L	Q	T	H	C	E	L	R	G	P	S	S	L	I	T	C	Y	S	N	H	T	C	P	P	C	1	1	1
698	C	P	P	C	D	L	L	K	L	L	L	Q	T	H	C	E	L	R	G	P	T	S	I	I	T	C	Y	S	N	H	T	C	P	P	C	1	1	1
699	C	P	P	C	D	L	L	K	L	L	L	Q	T	H	C	E	L	R	W	P	T	S	I	I	T	C	Y	S	N	H	T	C	P	P	C	1	1	1
700	C	P	P	C	D	L	L	K	L	L	L	Q	T	H	C	E	L	M	G	P	T	S	I	I	T	C	Y	S	N	H	T	C	P	P	C	1	1	1
701	C	P	P	C	D	L	L	K	L	L	L	Q	T	H	C	*	L	R	G	P	T	S	I	I	T	C	Y	S	N	H	T	C	P	P	C	1	1	1
702	C	P	P	C	D	L	L	K	L	L	L	Q	S	H	C	E	L	R	G	P	T	S	I	I	T	C	Y	S	N	H	T	C	P	P	C	1	1	1
703	C	P	P	C	D	L	L	K	L	L	L	E	T	H	C	E	L	R	G	P	T	S	I	I	T	C	Y	S	N	H	T	C	P	P	C	1	1	1
704	C	P	P	C	D	L	L	K	L	L	L	V	L	D	C	N	G	S	P	*	T	S	I	I	T	C	Y	S	N	H	T	C	P	P	C	1	1	1
705	C	P	P	C	D	L	L	K	L	L	L	Q	T	H	C	E	L	R	G	P	T	S	I	I	T	C	Y	S	N	H	T	C	P	P	C	1	1	1
706	C	P	P	C	D	L	L	K	L	L	V	D	S	V	C	E	A	R	S	K	T	S	I	I	T	C	Y	S	N	H	T	C	P	P	C	1	1	1
707	C	P	P	C	D	L	L	K	L	L	Y	I	W	H	C	N	R	E	L	Y	T	S	I	I	T	C	Y	S	N	H	T	C	P	P	C	1	1	1
708	C	P	P	C	D	L	L	K	L	L	L	D	T	L	C	W	G	T	K	H	T	S	I	I	T	C	Y	S	N	H	T	C	P	P	C	1	1	1
709	C	P	P	C	D	L	L	K	L	F	N	T	S	N	C	G	D	I	N	I	T	S	I	I	T	C	Y	S	N	H	T	C	P	P	C	1	1	1
710	C	P	P	C	D	L	L	K	L	F	N	T	S	K	C	G	D	I	N	I	T	S	I	I	T	C	Y	S	N	H	T	C	P	P	C	1	1	1
711	C	P	P	C	D	L	L	K	L	F	N	T	S	N	C	G	D	I	N	I	T	S	I	I	T	C	Y	S	N	H	T	C	P	P	C	1	1	1
712	C	P	P	C	D	L	L	K	L	F	N	T	S	N	C	G	D	I	N	I	T	S	I	I	T	C	Y	S	N	H	T	C	P	P	C	1	1	1
713	C	P	P	C	D	L	L	K	L	F	N	T	S	N	C	G	D	I	N	S	T	S	I	I	T	C	Y	S	N	H	T	C	P	P	C	1	1	1
714	C	P	P	C	D	L	L	K	L	F	N	T	S	N	C	G	D	I	N	I	N	S	I	I	T	C	Y	S	N	H	T	C	P	P	C	1	1	1
715	C	P	P	C	D	L	L	K	L	F	N	T	S	N	C	G	D	I	N	I	T	S	I	I	T	C	Y	S	N	H	T	C	P	P	C	1	1	1
716	C	P	P	C	D	L	L	K	L	F	N	T	S	N	C	G	D	I	N	I	T	S	S	I	T	C	Y	S	N	H	T	C	P	P	C	1	1	1
717	C	P	P	C	D	L	L	K	L	F	N	T	S	N	C	G	D	I	N	I	T	S	I	I	T	C	Y	S	N	H	T	C	P	P	C	1	1	1
718	C	P	P	C	D	L	L	K	L	F	N	T	S	N	C	G	D	I	N	I	T	S	I	I	T	C	Y	S	N	H	T	C	P	P	C	1	1	1
719	C	P	P	C	D	L	L	K	L	F	N	T	S	N	C	G	D	I	N	I	T	S	I	I	T	C	Y	S	N	H	T	C	P	P	C	1	1	1
720	C	P	P	C	D	L	L	K	L	F	N	T	S	N	C	G	D	I	N	I	T	S	I	I	T	C	Y	S	N	H	T	C	P	P	C	1	1	1
721	C	P	P	C	D	L	L	K	L	F	N	T	S	N	C	G	D	I	N	I	T	S	I	I	T	C	Y	S	N	N	T	C	P	P	C	1	1	1
722	C	P	P	C	D	L	L	K	L	F	N	T	S	N	C	G	D	I	N	I	T	S	I	I	T	C	Y	S	N	L	T	C	P	P	C	1	1	1
723	C	P	P	C	D	L	L	K	L	F	N	T	S	N	C	G	D	I	N	I	T	S	I	I	T	C	Y	S	D	H	T	C	P	P	C	1	1	1
724	C	P	P	C	D	L	L	K	L	F	N	T	S	N	C	G	D	I	N	I	T	S	I	L	T	C	Y	S	N	H	T	C	P	P	C	1	1	1
725	C	P	P	C	D	L	L	K	L	F	N	T	S	N	C	G	D	I	N	I	S	S	L	I	T	C	Y	S	N	H	T	C	P	P	C	1	1	1
726	C	P	P	C	D	L	L	K	L	F	N	T	S	N	C	G	D	I	T	I	T	S	I	I	T	C	Y	S	N	H	T	C	P	P	C	1	1	1
727	C	P	P	C	D	L	L	K	L	F	N	T	S	N	C	G	D	L	N	I	T	S	I	I	T	C	Y	S	N	H	T	C	P	P	C	1	1	1
728	C	P	P	C	D	L	L	K	L	F	N	T	S	N	C	G	D	F	N	I	T	S	I	I	T	C	Y	S	N	H	T	C	P	P	C	1	1	1
729	C	P	P	C	D	L	L	K	L	F	W	H	E	D	C	N	G	A	K	P	T	S	I	I	T	C	Y	S	N	H	T	C	P	P	C	1	1	1
730	C	P	P	C	D	L	L	K	F	L	L	Q	T	H	C	E	L	R	G	P	T	S	I	I	T	C	Y	S	N	H	T	C	P	P	C	1	1	1
731	C	P	P	C	D	L	L	N	L	L	A	H	P	P	C	Y	R	D	W	N	T	S	I	I	T	C	Y	S	N	H	T	C	P	P	C	1	1	1
732	C	P	P	C	D	L	L	N	L	L	P	T	K	L	C	N	R	G	H	E	T	S	I	I	T	C	Y	S	N	H	T	C	P	P	C	1	1	1
733	C	P	P	C	D	L	L	T	L	K	V	E	L	L	C	T	G	P	T	L	T	S	I	I	T	C	Y	S	N	H	T	C	P	P	C	1	1	1
734	C	P	P	C	D	L	L	R	L	Q	K	R	V	E	C	L	S	N	A	T	T	S	I	I	T	C	Y	S	N	H	T	C	P	P	C	1	1	1
735	C	P	P	C	D	L	L	M	L	M	A	N	S	S	C	E	F	H	F	H	T	S	I	I	T	C	Y	S	N	H	T	C	P	P	C	1	1	1
736	C	P	P	C	D	L	L	Q	L	M	A	N	S	S	C	E	I	H	F	H	T	S	I	I	T	C	Y	S	N	H	T	C	P	P	C	1	1	1
737	C	P	P	C	D	L	L	Q	L	L	A	H	P	P	C	Y	R	D	W	N	T	S	I	I	T	C	Y	S	N	H	T	C	P	P	C	1	1	1
738	C	P	P	C	D	L	L	Q	L	L	H	L	L	V	C	E	P	P	S	A	T	S	I	I	T	C	Y	S	N	H	T	C	P	P	C	1	1	1
739	C	P	P	C	D	L	L	E	L	S	V	P	E	Q	C	V	F	P	R	G	T	S	I	I	T	C	Y	S	N	H	T	C	P	P	C	1	1	1
740	C	P	P	C	D	L	L	E	L	L	A	H	P	P	C	Y	R	D	W	N	T	S	I	I	T	C	Y	S	N	H	T	C	P	P	C	1	1	1
741	C	P	P	C	D	L	L	*	L	I	V	R	G	I	C	E	E	E	W	R	T	S	I	I	T	C	Y	S	N	H	T	C	P	P	C	1	1	1
742	C	P	P	C	D	L	F	K	L	Q	K	R	V	E	C	L	S	N	A	T	T	S	I	I	T	C	Y	S	N	H	T	C	P	P	C	1	1	1

## Sheet: Library-2 S3-P9
Number	Sequences																																			Abundance
																																				Input	P9	Normalization
1	C	P	P	C	L	L	E	N	N	T	G	R	G	E	C	L	F	G	V	N	S	L	I	F	Q	C	N	F	I	P	N	C	P	P	C	1	4029	4029
2	C	P	P	C	L	L	E	N	N	V	T	R	E	T	C	G	L	S	M	L	S	L	I	F	Q	C	N	F	I	P	N	C	P	P	C	1	983	983
3	C	P	P	C	L	L	E	N	N	V	V	T	L	S	C	V	W	N	N	I	S	L	I	F	Q	C	N	F	I	P	N	C	P	P	C	1	911	911
4	C	P	P	C	L	L	E	N	N	G	S	I	T	L	C	S	L	A	N	K	S	L	I	F	Q	C	N	F	I	P	N	C	P	P	C	1	844	844
5	C	P	P	C	L	L	E	N	N	T	D	L	T	R	C	R	T	F	F	F	S	L	I	F	Q	C	N	F	I	P	N	C	P	P	C	1	717	717
6	C	P	P	C	L	L	E	N	N	T	L	W	T	T	C	Q	E	M	G	G	S	L	I	F	Q	C	N	F	I	P	N	C	P	P	C	1	638	638
7	C	P	P	C	L	L	E	N	N	P	I	V	L	V	C	R	R	A	K	D	S	L	I	F	Q	C	N	F	I	P	N	C	P	P	C	1	467	467
8	C	P	P	C	L	L	E	N	N	A	F	N	L	I	C	Q	K	E	P	E	S	L	I	F	Q	C	N	F	I	P	N	C	P	P	C	1	464	464
9	C	P	P	C	L	L	E	N	N	T	Y	R	L	S	C	R	S	R	I	G	S	L	I	F	Q	C	N	F	I	P	N	C	P	P	C	1	362	362
10	C	P	P	C	L	L	E	N	N	S	T	L	M	H	C	R	I	M	T	N	S	L	I	F	Q	C	N	F	I	P	N	C	P	P	C	1	329	329
11	C	P	P	C	L	L	E	N	N	M	S	A	A	F	C	R	L	S	E	P	S	L	I	F	Q	C	N	F	I	P	N	C	P	P	C	1	280	280
12	C	P	P	C	L	L	E	N	N	H	P	A	L	N	C	Q	P	W	M	F	S	L	I	F	Q	C	N	F	I	P	N	C	P	P	C	1	276	276
13	C	P	P	C	L	L	E	N	N	R	T	G	H	G	C	F	S	P	W	P	S	L	I	F	Q	C	N	F	I	P	N	C	P	P	C	1	217	217
14	C	P	P	C	L	L	E	N	N	F	F	P	V	S	C	*	L	H	R	R	S	L	I	F	Q	C	N	F	I	P	N	C	P	P	C	1	207	207
15	C	P	P	C	L	L	E	N	N	G	L	P	N	R	C	G	A	P	D	S	S	L	I	F	Q	C	N	F	I	P	N	C	P	P	C	1	182	182
16	C	P	P	C	L	L	E	N	N	G	T	W	M	M	C	Y	Q	A	N	A	S	L	I	F	Q	C	N	F	I	P	N	C	P	P	C	1	182	182
17	C	P	P	C	L	L	E	N	N	G	L	K	F	V	C	T	L	E	R	D	S	L	I	F	Q	C	N	F	I	P	N	C	P	P	C	1	169	169
18	C	P	P	C	L	L	E	N	N	T	I	V	T	K	C	R	D	E	N	R	S	L	I	F	Q	C	N	F	I	P	N	C	P	P	C	1	158	158
19	C	P	P	C	L	L	E	N	N	N	G	T	V	R	C	Y	D	S	S	N	S	L	I	F	Q	C	N	F	I	P	N	C	P	P	C	1	157	157
20	C	P	P	C	L	L	E	N	N	A	F	S	S	H	C	T	A	M	L	R	S	L	I	F	Q	C	N	F	I	P	N	C	P	P	C	1	155	155
21	C	P	P	C	L	L	E	N	N	Y	F	F	L	D	C	F	F	S	N	Y	S	L	I	F	Q	C	N	F	I	P	N	C	P	P	C	1	149	149
22	C	P	P	C	L	L	E	N	N	V	R	G	L	L	C	H	W	N	V	S	S	L	I	F	Q	C	N	F	I	P	N	C	P	P	C	1	129	129
23	C	P	P	C	L	L	E	N	N	G	F	N	V	R	C	M	P	T	S	D	S	L	I	F	Q	C	N	F	I	P	N	C	P	P	C	1	71	71
24	C	P	P	C	L	L	E	N	N	K	P	H	R	E	C	M	Q	R	G	Q	S	L	I	F	Q	C	N	F	I	P	N	C	P	P	C	1	67	67
25	C	P	P	C	L	L	E	N	N	S	F	E	L	R	C	K	A	Q	D	T	S	L	I	F	Q	C	N	F	I	P	N	C	P	P	C	4	246	61.5
26	C	P	P	C	L	L	E	N	N	Y	T	P	R	A	C	S	D	P	S	L	S	L	I	F	Q	C	N	F	I	P	N	C	P	P	C	1	61	61
27	C	P	P	C	L	L	E	N	N	S	S	L	I	A	C	R	G	L	V	D	S	L	I	F	Q	C	N	F	I	P	N	C	P	P	C	1	57	57
28	C	P	P	C	L	L	E	N	N	A	S	V	W	R	C	H	A	W	S	G	S	L	I	F	Q	C	N	F	I	P	N	C	P	P	C	1	50	50
29	C	P	P	C	L	L	E	N	N	E	G	K	R	L	C	E	T	E	M	I	S	L	I	F	Q	C	N	F	I	P	N	C	P	P	C	1	43	43
30	C	P	P	C	L	L	E	N	N	T	V	A	V	L	C	F	R	T	D	P	S	L	I	F	Q	C	N	F	I	P	N	C	P	P	C	1	42	42
31	C	P	P	C	L	L	E	N	N	H	F	T	I	E	C	T	R	G	T	A	S	L	I	F	Q	C	N	F	I	P	N	C	P	P	C	1	42	42
32	C	P	P	C	L	L	E	N	N	W	A	R	G	P	C	I	K	A	Q	V	S	L	I	F	Q	C	N	F	I	P	N	C	P	P	C	1	42	42
33	C	P	P	C	L	L	E	N	N	R	S	G	R	S	C	R	D	G	T	K	S	L	I	F	Q	C	N	F	I	P	N	C	P	P	C	1	40	40
34	C	P	P	C	L	L	E	N	N	W	T	H	L	N	C	T	I	D	F	S	S	L	I	F	Q	C	N	F	I	P	N	C	P	P	C	1	39	39
35	C	P	P	C	L	L	E	N	N	A	G	G	D	N	C	A	K	R	N	T	S	L	I	F	Q	C	N	F	I	P	N	C	P	P	C	1	36	36
36	C	P	P	C	L	L	E	N	N	Q	G	P	V	L	C	L	Y	N	S	T	S	L	I	F	Q	C	N	F	I	P	N	C	P	P	C	1	33	33
37	C	P	P	C	L	L	E	N	N	P	K	F	N	E	C	V	R	S	A	A	S	L	I	F	Q	C	N	F	I	P	N	C	P	P	C	1	33	33
38	C	P	P	C	L	L	E	N	N	N	A	S	T	L	C	H	I	I	Y	H	S	L	I	F	Q	C	N	F	I	P	N	C	P	P	C	1	32	32
39	C	P	P	C	L	L	E	N	N	H	S	I	T	S	C	V	A	V	*	Q	S	L	I	F	Q	C	N	F	I	P	N	C	P	P	C	1	31	31
40	C	P	P	C	L	L	E	N	N	R	G	G	D	P	C	M	W	V	F	Q	S	L	I	F	Q	C	N	F	I	P	N	C	P	P	C	1	30	30
41	C	P	P	C	L	L	E	N	N	G	T	F	S	G	C	I	R	V	G	S	S	L	I	F	Q	C	N	F	I	P	N	C	P	P	C	1	30	30
42	C	P	P	C	L	L	E	N	N	V	L	R	G	D	C	I	V	N	V	S	S	L	I	F	Q	C	N	F	I	P	N	C	P	P	C	1	29	29
43	C	P	P	C	L	L	E	N	N	H	S	F	A	G	C	T	K	V	L	S	S	L	I	F	Q	C	N	F	I	P	N	C	P	P	C	1	23	23
44	C	P	P	C	L	L	E	N	N	A	R	A	A	N	C	V	N	A	S	N	S	L	I	F	Q	C	N	F	I	P	N	C	P	P	C	1	23	23
45	C	P	P	C	L	L	E	N	N	A	A	P	S	D	C	W	S	T	D	L	S	L	I	F	Q	C	N	F	I	P	N	C	P	P	C	1	23	23
46	C	P	P	C	L	L	E	N	N	V	F	S	M	E	C	G	V	N	R	P	S	L	I	F	Q	C	N	F	I	P	N	C	P	P	C	1	23	23
47	C	P	P	C	L	L	E	N	N	K	F	V	I	T	C	T	R	L	K	Q	S	L	I	F	Q	C	N	F	I	P	N	C	P	P	C	1	21	21
48	C	P	P	C	L	L	E	N	N	R	S	V	E	S	C	I	P	Y	V	F	S	L	I	F	Q	C	N	F	I	P	N	C	P	P	C	1	21	21
49	C	P	P	C	L	L	E	N	N	R	S	I	Y	T	C	L	R	S	E	Q	S	L	I	F	Q	C	N	F	I	P	N	C	P	P	C	1	19	19
50	C	P	P	C	L	L	E	N	N	T	R	E	*	A	C	R	V	W	F	H	S	L	I	F	Q	C	N	F	I	P	N	C	P	P	C	1	18	18
51	C	P	P	C	L	L	E	N	N	M	S	F	N	M	C	F	S	T	L	E	S	L	I	F	Q	C	N	F	I	P	N	C	P	P	C	1	18	18
52	C	P	P	C	L	L	E	N	N	Y	T	G	T	S	C	L	F	L	G	V	S	L	I	F	Q	C	N	F	I	P	N	C	P	P	C	1	18	18
53	C	P	P	C	L	L	E	N	N	T	L	Q	V	S	C	R	D	I	L	Y	S	L	I	F	Q	C	N	F	I	P	N	C	P	P	C	1	17	17
54	C	P	P	C	L	L	E	N	N	E	A	G	R	Q	C	V	E	D	R	S	S	L	I	F	Q	C	N	F	I	P	N	C	P	P	C	1	16	16
55	C	P	P	C	L	L	E	N	N	T	G	F	L	Q	C	A	P	W	V	A	S	L	I	F	Q	C	N	F	I	P	N	C	P	P	C	1	15	15
56	C	P	P	C	L	L	E	N	N	A	V	V	N	M	C	V	H	A	V	K	S	L	I	F	Q	C	N	F	I	P	N	C	P	P	C	1	15	15
57	C	P	P	C	L	L	E	N	N	K	A	H	Y	P	C	L	R	E	G	S	S	L	I	F	Q	C	N	F	I	P	N	C	P	P	C	1	14	14
58	C	P	P	C	L	L	E	N	N	T	I	M	S	Q	C	R	S	I	M	S	S	L	I	F	Q	C	N	F	I	P	N	C	P	P	C	1	14	14
59	C	P	P	C	L	L	E	N	N	R	S	F	A	L	C	R	V	M	A	D	S	L	I	F	Q	C	N	F	I	P	N	C	P	P	C	1	14	14
60	C	P	P	C	L	L	E	N	N	N	L	S	F	H	C	M	G	R	V	F	S	L	I	F	Q	C	N	F	I	P	N	C	P	P	C	1	12	12
61	C	P	P	C	L	L	E	N	N	I	D	V	L	D	C	G	G	V	T	Y	S	L	I	F	Q	C	N	F	I	P	N	C	P	P	C	1	11	11
62	C	P	P	C	L	L	E	N	N	Q	S	M	V	T	C	R	D	H	T	G	S	L	I	F	Q	C	N	F	I	P	N	C	P	P	C	1	11	11
63	C	P	P	C	L	L	E	N	N	P	P	V	L	G	C	G	P	S	A	P	S	L	I	F	Q	C	N	F	I	P	N	C	P	P	C	1	11	11
64	C	P	P	C	L	L	E	N	N	L	R	P	T	T	C	A	A	L	A	Q	S	L	I	F	Q	C	N	F	I	P	N	C	P	P	C	1	11	11
65	C	P	P	C	L	L	E	N	N	S	T	F	L	N	C	S	Y	L	F	P	S	L	I	F	Q	C	N	F	I	P	N	C	P	P	C	1	10	10
66	C	P	P	C	L	L	E	N	N	P	S	A	L	H	C	S	V	V	F	P	S	L	I	F	Q	C	N	F	I	P	N	C	P	P	C	1	10	10
67	C	P	P	C	L	L	E	N	N	T	R	D	L	I	C	M	M	P	S	R	S	L	I	F	Q	C	N	F	I	P	N	C	P	P	C	1	9	9
68	C	P	P	C	L	L	E	N	N	T	R	G	N	R	C	E	E	S	L	Q	S	L	I	F	Q	C	N	F	I	P	N	C	P	P	C	1	9	9
69	C	P	P	C	L	L	E	N	N	L	L	S	H	F	C	L	P	P	S	L	S	L	I	F	Q	C	N	F	I	P	N	C	P	P	C	1	9	9
70	C	P	P	C	L	L	E	N	N	G	T	T	L	F	C	L	W	G	N	M	S	L	I	F	Q	C	N	F	I	P	N	C	P	P	C	1	9	9
71	C	P	P	C	L	L	E	N	N	V	T	L	V	Y	C	V	I	K	S	G	S	L	I	F	Q	C	N	F	I	P	N	C	P	P	C	1	8	8
72	C	P	P	C	L	L	E	N	N	S	R	F	V	P	C	S	T	A	F	F	S	L	I	F	Q	C	N	F	I	P	N	C	P	P	C	1	8	8
73	C	P	P	C	L	L	E	N	N	G	L	L	V	N	C	S	A	I	D	G	S	L	I	F	Q	C	N	F	I	P	N	C	P	P	C	1	7	7
74	C	P	P	C	L	L	E	N	N	Y	G	A	D	D	C	P	S	G	T	W	S	L	I	F	Q	C	N	F	I	P	N	C	P	P	C	1	7	7
75	C	P	P	C	L	L	E	N	N	S	N	P	S	S	C	S	A	W	I	E	S	L	I	F	Q	C	N	F	I	P	N	C	P	P	C	1	7	7
76	C	P	P	C	L	L	E	N	N	F	L	M	Y	L	C	D	V	S	N	F	S	L	I	F	Q	C	N	F	I	P	N	C	P	P	C	1	7	7
77	C	P	P	C	L	L	E	N	N	T	L	Y	L	H	C	V	V	G	D	A	S	L	I	F	Q	C	N	F	I	P	N	C	P	P	C	1	6	6
78	C	P	P	C	L	L	E	N	N	T	Y	E	A	L	C	G	E	H	L	R	S	L	I	F	Q	C	N	F	I	P	N	C	P	P	C	1	6	6
79	C	P	P	C	L	L	E	N	N	H	P	A	L	N	C	Q	P	W	R	F	S	L	I	F	Q	C	N	F	I	P	N	C	P	P	C	1	6	6
80	C	P	P	C	L	L	E	N	N	L	Q	V	A	D	C	A	T	L	R	I	S	L	I	F	Q	C	N	F	I	P	N	C	P	P	C	1	6	6
81	C	P	P	C	L	L	E	N	N	Y	L	V	N	S	C	N	S	R	L	K	S	L	I	F	Q	C	N	F	I	P	N	C	P	P	C	1	6	6
82	C	P	P	C	L	L	E	N	N	T	G	P	A	P	C	R	M	V	F	R	S	L	I	F	Q	C	N	F	I	P	N	C	P	P	C	1	5	5
83	C	P	P	C	L	L	E	N	N	T	R	S	F	N	C	I	D	F	Y	L	S	L	I	F	Q	C	N	F	I	P	N	C	P	P	C	1	5	5
84	C	P	P	C	L	L	E	N	N	T	W	A	V	N	C	H	I	P	G	K	S	L	I	F	Q	C	N	F	I	P	N	C	P	P	C	1	5	5
85	C	P	P	C	L	L	E	N	N	T	F	A	L	I	C	R	M	D	E	D	S	L	I	F	Q	C	N	F	I	P	N	C	P	P	C	1	5	5
86	C	P	P	C	L	L	E	N	N	R	A	M	V	N	C	R	G	L	L	G	S	L	I	F	Q	C	N	F	I	P	N	C	P	P	C	1	5	5
87	C	P	P	C	L	L	E	N	N	S	Y	F	D	V	C	D	Q	I	M	G	S	L	I	F	Q	C	N	F	I	P	N	C	P	P	C	1	5	5
88	C	P	P	C	L	L	E	N	N	I	P	G	R	H	C	R	S	M	D	V	S	L	I	F	Q	C	N	F	I	P	N	C	P	P	C	1	5	5
89	C	P	P	C	L	L	E	N	N	L	D	P	S	N	C	E	G	R	S	G	S	L	I	F	Q	C	N	F	I	P	N	C	P	P	C	1	5	5
90	C	P	P	C	L	L	E	N	N	A	G	G	D	N	C	A	K	R	T	T	S	L	I	F	Q	C	N	F	I	P	N	C	P	P	C	1	5	5
91	C	P	P	C	L	L	E	N	N	V	T	S	W	T	C	S	S	D	G	N	S	L	I	F	Q	C	N	F	I	P	N	C	P	P	C	1	5	5
92	C	P	P	C	L	L	E	N	N	Y	T	T	F	S	C	T	K	I	Q	D	S	L	I	F	Q	C	N	F	I	P	N	C	P	P	C	1	5	5
93	C	P	P	C	L	L	E	N	N	W	H	S	H	L	C	Q	L	V	R	G	S	L	I	F	Q	C	N	F	I	P	N	C	P	P	C	1	5	5
94	C	P	P	C	L	L	E	N	N	T	L	K	N	W	C	L	D	V	S	W	S	L	I	F	Q	C	N	F	I	P	N	C	P	P	C	1	4	4
95	C	P	P	C	L	L	E	N	N	T	Y	R	L	S	C	R	S	R	L	G	S	L	I	F	Q	C	N	F	I	P	N	C	P	P	C	1	4	4
96	C	P	P	C	L	L	E	N	N	T	Y	V	L	S	C	D	T	L	V	S	S	L	I	F	Q	C	N	F	I	P	N	C	P	P	C	1	4	4
97	C	P	P	C	L	L	E	N	N	I	T	K	G	R	C	L	Q	R	L	Y	S	L	I	F	Q	C	N	F	I	P	N	C	P	P	C	1	4	4
98	C	P	P	C	L	L	E	N	N	I	S	V	L	Y	C	W	E	G	R	F	S	L	I	F	Q	C	N	F	I	P	N	C	P	P	C	1	4	4
99	C	P	P	C	L	L	E	N	N	H	Q	D	S	V	C	S	A	L	M	G	S	L	I	F	Q	C	N	F	I	P	N	C	P	P	C	1	4	4
100	C	P	P	C	L	L	E	N	N	R	K	N	S	P	C	G	F	E	G	P	S	L	I	F	Q	C	N	F	I	P	N	C	P	P	C	1	4	4
101	C	P	P	C	L	L	E	N	N	V	I	P	N	N	C	V	G	S	A	L	S	L	I	F	Q	C	N	F	I	P	N	C	P	P	C	1	4	4
102	C	P	P	C	L	L	E	N	N	V	S	N	W	T	C	R	G	L	V	S	S	L	I	F	Q	C	N	F	I	P	N	C	P	P	C	1	4	4
103	C	P	P	C	L	L	E	N	N	S	T	N	R	Q	C	L	T	L	L	A	S	L	I	F	Q	C	N	F	I	P	N	C	P	P	C	1	4	4
104	C	P	P	C	L	L	E	N	N	S	E	T	L	W	C	S	V	S	S	R	S	L	I	F	Q	C	N	F	I	P	N	C	P	P	C	1	4	4
105	C	P	P	C	L	L	E	N	N	L	Q	H	L	R	C	R	N	S	W	G	S	L	I	F	Q	C	N	F	I	P	N	C	P	P	C	1	4	4
106	C	P	P	C	L	L	E	N	N	L	S	I	A	T	C	S	Y	F	A	P	S	L	I	F	Q	C	N	F	I	P	N	C	P	P	C	3	11	3.66667
107	C	P	P	C	L	L	E	N	N	T	I	S	I	I	C	G	A	V	L	R	S	L	I	F	Q	C	N	F	I	P	N	C	P	P	C	1	3	3
108	C	P	P	C	L	L	E	N	N	T	R	L	I	G	C	T	L	G	L	H	S	L	I	F	Q	C	N	F	I	P	N	C	P	P	C	1	3	3
109	C	P	P	C	L	L	E	N	N	T	L	L	V	T	C	H	N	T	N	Q	S	L	I	F	Q	C	N	F	I	P	N	C	P	P	C	1	3	3
110	C	P	P	C	L	L	E	N	N	T	K	H	V	K	C	G	A	L	V	E	S	L	I	F	Q	C	N	F	I	P	N	C	P	P	C	1	3	3
111	C	P	P	C	L	L	E	N	N	T	N	A	P	G	C	P	V	V	F	T	S	L	I	F	Q	C	N	F	I	P	N	C	P	P	C	1	3	3
112	C	P	P	C	L	L	E	N	N	S	S	G	V	W	C	R	R	I	R	P	S	L	I	F	Q	C	N	F	I	P	N	C	P	P	C	1	3	3
113	C	P	P	C	L	L	E	N	N	I	M	Y	F	N	C	S	F	I	V	D	S	L	I	F	Q	C	N	F	I	P	N	C	P	P	C	1	3	3
114	C	P	P	C	L	L	E	N	N	I	G	R	V	K	C	L	V	N	I	T	S	L	I	F	Q	C	N	F	I	P	N	C	P	P	C	1	3	3
115	C	P	P	C	L	L	E	N	N	H	P	A	L	N	C	Q	P	W	M	V	S	L	I	F	Q	C	N	F	I	P	N	C	P	P	C	1	3	3
116	C	P	P	C	L	L	E	N	N	L	T	E	E	T	C	D	N	G	V	F	S	L	I	F	Q	C	N	F	I	P	N	C	P	P	C	1	3	3
117	C	P	P	C	L	L	E	N	N	A	F	N	L	I	C	Q	K	E	P	E	S	L	I	F	Q	C	N	F	I	P	N	C	P	P	C	1	3	3
118	C	P	P	C	L	L	E	N	N	G	S	F	V	A	C	P	S	V	G	W	S	L	I	F	Q	C	N	F	I	P	N	C	P	P	C	1	3	3
119	C	P	P	C	L	L	E	N	N	G	V	I	F	F	C	L	L	K	S	G	S	L	I	F	Q	C	N	F	I	P	N	C	P	P	C	1	3	3
120	C	P	P	C	L	L	E	N	N	G	T	W	M	M	C	Y	Q	A	T	A	S	L	I	F	Q	C	N	F	I	P	N	C	P	P	C	1	3	3
121	C	P	P	C	L	L	E	N	N	Y	F	I	H	K	C	K	I	N	I	R	S	L	I	F	Q	C	N	F	I	P	N	C	P	P	C	1	3	3
122	C	P	P	C	L	L	E	N	N	S	V	P	N	Q	C	Q	V	Y	R	Y	S	L	I	F	Q	C	N	F	I	P	N	C	P	P	C	1	3	3
123	C	P	P	C	L	L	E	N	N	S	Q	L	H	P	C	S	I	L	L	E	S	L	I	F	Q	C	N	F	I	P	N	C	P	P	C	1	3	3
124	C	P	P	C	L	L	E	N	N	S	S	L	Y	D	C	I	K	I	K	E	S	L	I	F	Q	C	N	F	I	P	N	C	P	P	C	1	3	3
125	C	P	P	C	L	L	E	N	N	W	H	L	V	R	C	T	E	E	T	G	S	L	I	F	Q	C	N	F	I	P	N	C	P	P	C	1	3	3
126	C	P	P	C	L	L	E	N	N	F	F	P	V	S	C	*	L	H	R	R	S	L	I	F	Q	C	N	F	I	P	N	C	P	P	C	1	3	3
127	C	P	P	C	L	L	E	N	N	F	F	P	V	S	C	*	L	H	R	R	R	L	I	F	Q	C	N	F	I	P	N	C	P	P	C	1	3	3
128	C	P	P	C	L	L	K	N	N	A	T	V	Q	F	C	L	Q	V	I	L	S	L	I	F	Q	C	N	F	I	P	N	C	P	P	C	1	2	2
129	C	P	P	C	L	L	E	N	N	G	L	K	F	V	C	T	L	E	R	D	S	L	I	F	Q	C	N	F	I	P	N	C	P	P	C	1	2	2
130	C	P	P	C	L	L	E	N	N	K	T	L	L	A	C	L	T	R	I	H	S	L	I	F	Q	C	N	F	I	P	N	C	P	P	C	1	2	2
131	C	P	P	C	L	L	E	N	N	T	N	I	I	F	C	W	P	K	G	A	S	L	I	F	Q	C	N	F	I	P	N	C	P	P	C	1	2	2
132	C	P	P	C	L	L	E	N	N	T	I	V	T	K	C	R	D	E	N	R	S	L	I	F	Q	C	N	F	I	P	N	C	P	P	C	1	2	2
133	C	P	P	C	L	L	E	N	N	T	L	Q	V	S	C	R	D	I	L	Y	S	L	I	F	Q	C	N	F	I	P	N	C	P	P	C	1	2	2
134	C	P	P	C	L	L	E	N	N	T	P	D	S	A	C	M	R	R	V	W	S	L	I	F	Q	C	N	F	I	P	N	C	P	P	C	1	2	2
135	C	P	P	C	L	L	E	N	N	T	Y	R	L	S	C	R	S	R	I	G	S	L	I	F	Q	C	N	F	I	P	N	C	P	P	C	1	2	2
136	C	P	P	C	L	L	E	N	N	T	Y	R	L	S	C	R	S	R	I	G	S	L	I	F	Q	C	N	L	I	P	N	C	P	P	C	1	2	2
137	C	P	P	C	L	L	E	N	N	R	T	G	H	G	C	F	S	P	W	P	S	L	I	F	Q	C	N	F	I	P	N	C	P	P	C	1	2	2
138	C	P	P	C	L	L	E	N	N	R	T	G	H	G	C	F	S	P	W	P	S	L	I	F	Q	C	N	F	I	P	N	C	P	P	C	1	2	2
139	C	P	P	C	L	L	E	N	N	R	T	G	H	G	C	F	S	P	W	P	S	L	I	F	Q	C	N	S	I	P	N	C	P	P	C	1	2	2
140	C	P	P	C	L	L	E	N	N	R	T	G	H	G	C	F	S	P	W	P	S	L	I	F	Q	C	N	F	I	P	N	C	P	P	C	1	2	2
141	C	P	P	C	L	L	E	N	N	R	T	G	H	G	C	F	S	P	W	P	I	L	I	F	Q	C	N	F	I	P	N	C	P	P	C	1	2	2
142	C	P	P	C	L	L	E	N	N	M	S	A	A	F	C	R	L	S	E	P	S	L	I	F	Q	C	N	F	I	P	N	C	P	P	C	1	2	2
143	C	P	P	C	L	L	E	N	N	H	P	H	N	D	C	V	T	R	Y	P	S	L	I	F	Q	C	N	F	I	P	N	C	P	P	C	1	2	2
144	C	P	P	C	L	L	E	N	N	P	S	V	L	V	C	R	R	A	K	D	S	L	I	F	Q	C	N	F	I	P	N	C	P	P	C	1	2	2
145	C	P	P	C	L	L	E	N	N	P	I	M	L	V	C	R	R	A	K	D	S	L	I	F	Q	C	N	F	I	P	N	C	P	P	C	1	2	2
146	C	P	P	C	L	L	E	N	N	P	I	V	L	V	C	R	R	A	T	D	S	L	I	F	Q	C	N	F	I	P	N	C	P	P	C	1	2	2
147	C	P	P	C	L	L	E	N	N	R	S	F	A	L	C	R	V	M	A	H	S	L	I	F	Q	C	N	F	I	P	N	C	P	P	C	1	2	2
148	C	P	P	C	L	L	E	N	N	R	L	D	M	V	C	G	K	I	N	W	S	L	I	F	Q	C	N	F	I	P	N	C	P	P	C	1	2	2
149	C	P	P	C	L	L	E	N	N	E	R	A	V	L	C	R	P	T	T	E	S	L	I	F	Q	C	N	F	I	P	N	C	P	P	C	1	2	2
150	C	P	P	C	L	L	E	N	N	E	*	W	T	R	C	A	E	D	G	*	S	L	I	F	Q	C	N	F	I	P	N	C	P	P	C	1	2	2
151	C	P	P	C	L	L	E	N	N	D	R	M	S	R	C	S	A	L	R	R	S	L	I	F	Q	C	N	F	I	P	N	C	P	P	C	1	2	2
152	C	P	P	C	L	L	E	N	N	D	S	N	D	L	C	A	T	S	N	S	S	L	I	F	Q	C	N	F	I	P	N	C	P	P	C	1	2	2
153	C	P	P	C	L	L	E	N	N	A	Q	G	R	D	C	F	T	S	V	T	S	L	I	F	Q	C	N	F	I	P	N	C	P	P	C	1	2	2
154	C	P	P	C	L	L	E	N	N	A	E	W	F	S	C	I	R	S	N	A	S	L	I	F	Q	C	N	F	I	P	N	C	P	P	C	1	2	2
155	C	P	P	C	L	L	E	N	N	A	F	N	L	I	C	Q	K	E	P	E	S	L	I	F	Q	C	N	F	I	P	N	C	P	P	C	1	2	2
156	C	P	P	C	L	L	E	N	N	A	F	N	L	I	C	Q	K	E	P	E	S	L	I	F	Q	C	N	F	I	P	T	C	P	P	C	1	2	2
157	C	P	P	C	L	L	E	N	N	A	S	V	W	R	C	H	A	W	S	G	S	L	I	S	Q	C	N	F	I	P	N	C	P	P	C	1	2	2
158	C	P	P	C	L	L	E	N	N	G	L	P	N	R	C	G	A	P	D	S	S	L	I	F	Q	C	N	F	I	P	T	C	P	P	C	1	2	2
159	C	P	P	C	L	L	E	N	N	G	L	P	N	R	C	G	A	P	D	S	R	L	I	F	Q	C	N	F	I	P	N	C	P	P	C	1	2	2
160	C	P	P	C	L	L	E	N	N	V	R	G	L	L	C	H	W	N	V	S	S	L	I	F	Q	C	N	F	I	P	N	C	P	P	C	1	2	2
161	C	P	P	C	L	L	E	N	N	V	A	N	S	L	C	V	P	K	E	N	S	L	I	F	Q	C	N	F	I	P	N	C	P	P	C	1	2	2
162	C	P	P	C	L	L	E	N	N	S	T	L	M	H	C	R	I	M	T	N	S	L	I	F	Q	C	N	F	I	P	N	C	P	P	C	1	2	2
163	C	P	P	C	L	L	E	N	N	S	V	P	N	Q	C	Q	V	Y	R	Y	S	L	I	F	Q	C	N	F	I	S	N	C	P	P	C	1	2	2
164	C	P	P	C	L	L	E	N	N	F	S	S	S	T	C	V	E	L	V	L	S	L	I	F	Q	C	N	F	I	P	N	C	P	P	C	1	2	2
165	C	P	P	C	L	L	E	N	N	F	F	P	V	S	C	*	L	H	R	R	S	L	I	F	Q	C	N	F	I	P	N	C	P	P	C	1	2	2
166	C	P	P	C	L	L	E	N	N	F	F	P	V	S	C	*	L	H	R	R	S	L	I	F	Q	C	N	F	I	P	N	C	P	P	C	1	2	2
167	C	P	P	C	L	L	E	N	N	F	F	P	V	S	C	*	L	H	R	R	S	L	I	F	Q	C	N	F	I	P	N	C	P	P	C	1	2	2
168	C	P	P	C	L	L	E	N	N	F	F	P	V	S	C	*	L	H	R	R	S	L	I	F	L	C	N	F	I	P	N	C	P	P	C	1	2	2
169	C	P	P	C	L	L	E	T	N	M	S	A	A	F	C	R	L	S	E	P	S	L	I	F	Q	C	N	F	I	P	N	C	P	P	C	1	2	2
170	C	P	P	C	L	L	D	N	N	T	I	V	T	K	C	R	D	E	N	R	S	L	I	F	Q	C	N	F	I	P	N	C	P	P	C	1	1	1
171	C	P	P	C	L	L	E	N	N	T	Y	R	L	S	C	R	S	R	I	G	S	L	I	F	Q	C	N	F	I	P	N	C	P	P	C	1	1	1
172	C	P	P	C	L	L	E	N	N	A	F	N	L	I	C	Q	K	E	P	E	S	L	I	F	Q	C	N	F	I	P	N	C	P	P	C	1	1	1
173	C	P	P	C	L	L	E	N	N	G	L	K	F	V	C	T	L	E	R	D	S	L	I	F	Q	C	H	F	I	P	N	C	P	P	C	1	1	1
174	C	P	P	C	L	L	E	N	N	G	L	K	F	V	C	T	L	E	R	D	S	L	I	F	L	C	N	F	I	Q	N	C	P	P	C	1	1	1
175	C	P	P	C	L	L	E	N	N	M	S	A	A	F	C	R	L	S	E	P	S	L	I	F	Q	C	N	F	I	P	N	C	P	P	C	1	1	1
176	C	P	P	C	L	L	E	N	N	H	P	A	L	N	C	Q	P	W	M	F	S	L	I	F	Q	C	N	F	I	P	N	C	P	P	C	1	1	1
177	C	P	P	C	L	L	E	N	N	G	F	N	V	R	C	M	P	T	S	D	S	L	I	F	Q	C	N	F	I	P	N	C	P	P	C	1	1	1
178	C	P	P	C	L	L	E	N	N	S	T	L	M	H	C	R	I	M	T	N	S	L	I	F	Q	C	N	F	I	P	N	C	P	P	C	1	1	1
179	C	P	P	C	L	L	E	N	N	K	T	L	L	A	C	L	T	R	L	H	S	L	I	F	Q	C	N	F	I	P	T	C	P	P	C	1	1	1
180	C	P	P	C	L	L	E	N	N	K	P	H	R	E	C	M	Q	R	G	Q	S	L	I	L	Q	C	N	F	I	P	N	C	P	P	C	1	1	1
181	C	P	P	C	L	L	E	N	N	K	P	H	R	E	C	M	Q	R	G	Q	S	L	I	F	Q	C	N	F	I	P	T	C	P	P	C	1	1	1
182	C	P	P	C	L	L	E	N	N	K	P	H	R	E	C	I	Q	R	G	Q	S	L	I	F	Q	C	N	F	I	P	N	C	P	P	C	1	1	1
183	C	P	P	C	L	L	E	N	N	K	A	H	Y	P	C	V	R	E	G	S	S	L	I	F	Q	C	N	F	I	P	N	C	P	P	C	1	1	1
184	C	P	P	C	L	L	E	N	N	K	F	V	I	T	C	T	R	L	K	Q	S	L	I	F	Q	C	N	F	I	P	N	C	P	P	C	1	1	1
185	C	P	P	C	L	L	E	N	N	K	F	V	I	T	C	T	R	L	K	Q	S	L	I	F	Q	C	N	F	I	P	T	C	P	P	C	1	1	1
186	C	P	P	C	L	L	E	N	N	N	A	V	P	G	C	A	N	S	T	D	S	L	I	F	Q	C	N	F	I	P	N	C	P	P	C	1	1	1
187	C	P	P	C	L	L	E	N	N	N	A	S	T	L	C	H	L	I	Y	H	S	L	I	F	Q	C	N	F	I	P	N	C	P	P	C	1	1	1
188	C	P	P	C	L	L	E	N	N	N	G	T	V	R	C	Y	D	S	S	N	S	L	I	F	Q	C	N	F	I	P	N	C	P	P	C	1	1	1
189	C	P	P	C	L	L	E	N	N	N	G	T	V	R	C	Y	D	S	S	N	S	L	I	F	Q	C	N	F	I	P	N	C	P	P	C	1	1	1
190	C	P	P	C	L	L	E	N	N	N	G	T	V	R	C	Y	D	P	S	N	S	L	I	F	Q	C	N	F	I	P	N	C	P	P	C	1	1	1
191	C	P	P	C	L	L	E	N	N	N	G	T	V	R	C	Y	D	S	S	K	S	L	I	F	Q	C	N	F	I	P	N	C	P	P	C	1	1	1
192	C	P	P	C	L	L	E	N	N	N	G	T	V	R	C	Y	D	S	S	N	S	L	I	F	Q	C	N	F	I	L	N	C	P	P	C	1	1	1
193	C	P	P	C	L	L	E	N	N	N	G	T	V	R	C	Y	D	S	S	N	S	L	I	F	Q	C	N	F	I	P	N	C	P	P	C	1	1	1
194	C	P	P	C	L	L	E	N	N	T	S	A	A	F	C	R	L	S	E	P	S	L	I	F	Q	C	N	F	I	P	N	C	P	P	C	1	1	1
195	C	P	P	C	L	L	E	N	N	T	I	G	R	T	C	A	V	L	I	S	S	L	I	F	Q	C	N	F	I	P	N	C	P	P	C	1	1	1
196	C	P	P	C	L	L	E	N	N	T	I	V	T	K	C	R	D	E	N	R	S	L	I	F	Q	C	N	F	I	P	N	C	P	P	C	1	1	1
197	C	P	P	C	L	L	E	N	N	T	P	S	E	R	C	W	R	I	T	L	S	L	I	F	Q	C	N	F	I	P	N	C	P	P	C	1	1	1
198	C	P	P	C	L	L	E	N	N	T	R	T	F	N	C	S	F	L	L	T	S	L	I	F	Q	C	N	F	I	P	N	C	P	P	C	1	1	1
199	C	P	P	C	L	L	E	N	N	T	G	G	*	Y	C	W	S	W	T	R	S	L	I	F	Q	C	N	F	I	P	N	C	P	P	C	1	1	1
200	C	P	P	C	L	L	E	N	N	T	L	Q	V	S	C	R	D	S	L	Y	S	L	I	F	Q	C	N	F	I	P	N	C	P	P	C	1	1	1
201	C	P	P	C	L	L	E	N	N	T	L	Q	V	S	C	R	D	L	L	Y	S	L	I	F	Q	C	N	F	I	P	N	C	P	P	C	1	1	1
202	C	P	P	C	L	L	E	N	N	T	F	R	L	A	C	M	F	S	N	D	S	L	I	F	Q	C	N	F	I	P	N	C	P	P	C	1	1	1
203	C	P	P	C	L	L	E	N	N	T	F	A	A	G	C	Y	R	I	Y	R	S	L	I	F	Q	C	N	F	I	P	N	C	P	P	C	1	1	1
204	C	P	P	C	L	L	E	N	N	T	R	E	*	A	C	R	V	W	F	H	S	L	I	F	Q	C	N	F	I	P	T	C	P	P	C	1	1	1
205	C	P	P	C	L	L	E	N	N	T	R	S	F	N	C	I	D	F	Y	L	S	L	I	F	Q	C	N	F	I	P	N	C	P	P	C	1	1	1
206	C	P	P	C	L	L	E	N	N	T	Y	R	L	S	C	R	S	R	I	G	S	L	I	F	Q	C	N	F	I	P	N	C	P	P	C	1	1	1
207	C	P	P	C	L	L	E	N	N	T	Y	R	L	S	C	R	S	R	T	G	S	L	I	F	Q	C	N	F	I	P	N	C	P	P	C	1	1	1
208	C	P	P	C	L	L	E	N	N	T	Y	R	L	S	C	R	S	R	I	G	S	L	I	F	Q	C	N	F	T	P	N	C	P	P	C	1	1	1
209	C	P	P	C	L	L	E	N	N	T	Y	R	L	S	C	R	S	R	I	G	S	L	I	F	Q	C	N	F	I	P	N	C	P	P	C	1	1	1
210	C	P	P	C	L	L	E	N	N	T	Y	R	L	S	C	R	S	R	I	G	S	L	I	F	Q	C	N	F	I	P	N	C	P	P	C	1	1	1
211	C	P	P	C	L	L	E	N	N	T	Y	R	L	S	C	R	S	R	I	G	S	L	I	F	Q	C	N	F	I	P	N	C	P	P	C	1	1	1
212	C	P	P	C	L	L	E	N	N	T	Y	R	L	S	C	R	S	R	I	G	S	L	I	F	Q	C	N	F	I	P	N	C	P	P	C	1	1	1
213	C	P	P	C	L	L	E	N	N	T	Y	R	L	S	C	S	S	R	I	G	S	L	I	F	Q	C	N	F	I	P	N	C	P	P	C	1	1	1
214	C	P	P	C	L	L	E	N	N	T	Y	E	A	L	C	G	E	H	L	R	T	L	I	F	Q	C	N	F	I	P	N	C	P	P	C	1	1	1
215	C	P	P	C	L	L	E	N	N	T	Y	V	L	S	C	D	T	L	V	S	S	L	I	F	Q	C	N	F	I	S	N	C	P	P	C	1	1	1
216	C	P	P	C	L	L	E	N	N	T	F	A	L	I	C	R	M	E	E	D	S	L	I	F	Q	C	N	F	I	P	N	C	P	P	C	1	1	1
217	C	P	P	C	L	L	E	N	N	R	K	S	L	L	C	Y	D	L	E	E	S	L	I	F	Q	C	N	F	I	P	N	C	P	P	C	1	1	1
218	C	P	P	C	L	L	E	N	N	R	T	G	H	G	C	S	S	P	W	P	S	L	I	F	Q	C	N	F	I	P	N	C	P	P	C	1	1	1
219	C	P	P	C	L	L	E	N	N	R	T	G	H	G	C	F	S	P	S	P	S	L	I	F	Q	C	N	F	I	P	N	C	P	P	C	1	1	1
220	C	P	P	C	L	L	E	N	N	R	T	G	H	G	C	F	S	P	W	P	S	L	I	S	Q	C	N	F	I	P	N	C	P	P	C	1	1	1
221	C	P	P	C	L	L	E	N	N	R	T	G	H	G	C	F	S	P	W	P	S	L	I	F	Q	C	N	F	I	P	N	C	P	P	C	1	1	1
222	C	P	P	C	L	L	E	N	N	R	R	G	E	W	C	N	S	W	G	R	S	L	I	F	Q	C	N	F	I	P	N	C	P	P	C	1	1	1
223	C	P	P	C	L	L	E	N	N	R	D	S	P	I	C	Y	F	H	F	L	S	L	I	F	Q	C	N	F	I	P	N	C	P	P	C	1	1	1
224	C	P	P	C	L	L	E	N	N	S	V	Y	L	D	C	P	R	R	S	E	S	L	I	F	Q	C	N	F	I	P	N	C	P	P	C	1	1	1
225	C	P	P	C	L	L	E	N	N	S	S	E	L	R	C	K	A	Q	D	T	S	L	I	F	Q	C	N	F	I	P	N	C	P	P	C	1	1	1
226	C	P	P	C	L	L	E	N	N	S	F	E	L	R	C	K	A	Q	D	T	S	L	I	F	Q	C	N	F	I	P	N	C	P	P	C	1	1	1
227	C	P	P	C	L	L	E	N	N	S	F	E	L	R	C	K	A	Q	D	T	S	L	I	F	Q	C	N	F	I	P	N	C	P	P	C	1	1	1
228	C	P	P	C	L	L	E	N	N	S	F	E	L	R	C	K	A	Q	D	T	S	L	I	F	Q	C	N	F	I	P	N	C	P	P	C	1	1	1
229	C	P	P	C	L	L	E	N	N	S	F	E	L	R	C	K	A	Q	D	T	S	L	I	F	Q	C	N	F	I	P	N	C	P	P	C	1	1	1
230	C	P	P	C	L	L	E	N	N	S	F	E	L	R	C	K	A	Q	D	T	S	L	I	F	Q	C	N	F	I	P	N	C	P	P	C	1	1	1
231	C	P	P	C	L	L	E	N	N	S	F	E	L	R	C	K	A	Q	D	T	S	L	I	F	Q	C	N	F	I	P	N	C	P	P	C	1	1	1
232	C	P	P	C	L	L	E	N	N	S	F	E	L	R	C	K	A	Q	D	T	S	L	I	F	Q	C	N	F	T	P	N	C	P	P	C	1	1	1
233	C	P	P	C	L	L	E	N	N	S	F	E	L	R	C	K	A	Q	Y	T	S	L	I	F	Q	C	N	F	I	P	N	C	P	P	C	1	1	1
234	C	P	P	C	L	L	E	N	N	S	F	E	L	R	C	K	V	Q	D	T	S	L	I	F	Q	C	N	F	I	P	N	C	P	P	C	1	1	1
235	C	P	P	C	L	L	E	N	N	S	F	E	L	R	C	T	A	Q	D	T	S	L	I	F	Q	C	N	F	I	P	N	C	P	P	C	1	1	1
236	C	P	P	C	L	L	E	N	N	M	S	A	A	F	C	R	L	S	E	P	S	L	I	F	Q	C	N	F	I	R	N	C	P	P	C	1	1	1
237	C	P	P	C	L	L	E	N	N	M	S	A	A	F	C	R	L	S	E	P	S	L	I	F	Q	C	H	F	I	P	N	C	P	P	C	1	1	1
238	C	P	P	C	L	L	E	N	N	I	D	V	L	D	C	G	G	V	T	Y	S	L	I	F	Q	C	N	F	I	P	N	C	P	P	C	1	1	1
239	C	P	P	C	L	L	E	N	N	I	D	V	L	D	C	G	G	V	T	D	S	L	I	F	Q	C	N	F	I	P	N	C	P	P	C	1	1	1
240	C	P	P	C	L	L	E	N	N	I	F	E	L	R	C	K	A	Q	D	T	S	L	I	F	Q	C	N	F	I	P	N	C	P	P	C	1	1	1
241	C	P	P	C	L	L	E	N	N	Q	T	K	Y	M	C	S	*	R	V	R	S	L	I	F	Q	C	N	F	I	P	N	C	P	P	C	1	1	1
242	C	P	P	C	L	L	E	N	N	Q	I	L	L	L	C	N	S	Y	G	H	S	L	I	F	Q	C	N	F	I	P	N	C	P	P	C	1	1	1
243	C	P	P	C	L	L	E	N	N	Q	L	D	V	W	C	*	F	G	V	T	S	L	I	F	Q	C	N	F	I	P	N	C	P	P	C	1	1	1
244	C	P	P	C	L	L	E	N	N	Q	G	P	V	L	C	L	Y	N	S	T	S	L	I	F	Q	C	N	L	I	P	N	C	P	P	C	1	1	1
245	C	P	P	C	L	L	E	N	N	Q	V	M	P	Y	C	R	H	A	Q	H	S	L	I	F	Q	C	N	F	I	P	N	C	P	P	C	1	1	1
246	C	P	P	C	L	L	E	N	N	Q	W	K	S	P	C	V	L	K	*	T	S	L	I	F	Q	C	N	F	I	P	N	C	P	P	C	1	1	1
247	C	P	P	C	L	L	E	N	N	H	P	A	L	N	C	Q	P	W	M	F	S	L	I	L	Q	C	N	F	I	P	N	C	P	P	C	1	1	1
248	C	P	P	C	L	L	E	N	N	H	P	A	L	N	C	Q	P	W	V	F	S	L	I	F	Q	C	N	F	I	P	N	C	P	P	C	1	1	1
249	C	P	P	C	L	L	E	N	N	H	P	A	L	N	C	Q	R	W	M	F	S	L	I	F	Q	C	N	F	I	P	N	C	P	P	C	1	1	1
250	C	P	P	C	L	L	E	N	N	H	G	T	V	R	C	Y	D	S	S	N	S	L	I	F	Q	C	N	F	I	P	N	C	P	P	C	1	1	1
251	C	P	P	C	L	L	E	N	N	H	S	F	A	G	C	T	K	V	L	S	S	L	I	F	Q	C	N	F	I	P	N	C	P	P	C	1	1	1
252	C	P	P	C	L	L	E	N	N	H	L	T	I	E	C	T	R	G	T	A	S	L	I	F	Q	C	N	F	I	P	N	C	P	P	C	1	1	1
253	C	P	P	C	L	L	E	N	N	P	K	F	Y	E	C	V	R	S	A	A	S	L	I	F	Q	C	N	F	I	P	N	C	P	P	C	1	1	1
254	C	P	P	C	L	L	E	N	N	P	I	V	L	V	C	R	R	A	K	E	S	L	I	F	Q	C	N	F	I	P	N	C	P	P	C	1	1	1
255	C	P	P	C	L	L	E	N	N	P	I	V	L	V	C	R	R	A	K	D	S	L	I	F	Q	C	N	F	I	P	N	C	P	P	C	1	1	1
256	C	P	P	C	L	L	E	N	N	P	I	V	L	V	C	R	R	A	K	D	S	L	I	S	Q	C	N	F	I	P	N	C	P	P	C	1	1	1
257	C	P	P	C	L	L	E	N	N	P	I	V	L	V	C	R	R	A	K	D	S	L	I	F	Q	C	N	F	I	P	N	C	P	P	C	1	1	1
258	C	P	P	C	L	L	E	N	N	P	I	V	L	V	C	R	R	A	K	D	S	L	I	F	Q	C	N	F	I	P	N	C	P	P	C	1	1	1
259	C	P	P	C	L	L	E	N	N	P	I	V	L	V	C	R	R	A	K	D	S	L	I	F	Q	C	N	F	I	P	T	C	P	P	C	1	1	1
260	C	P	P	C	L	L	E	N	N	P	I	V	L	V	C	R	R	A	K	D	S	L	I	F	Q	C	H	F	I	P	N	C	P	P	C	1	1	1
261	C	P	P	C	L	L	E	N	N	P	I	V	L	V	C	R	R	A	K	D	S	L	I	F	R	C	N	F	I	P	N	C	P	P	C	1	1	1
262	C	P	P	C	L	L	E	N	N	P	I	V	L	V	C	R	R	A	K	D	R	L	I	F	Q	C	N	F	I	P	N	C	P	P	C	1	1	1
263	C	P	P	C	L	L	E	N	N	P	I	V	L	V	C	M	R	A	K	D	S	L	I	F	Q	C	N	F	I	P	N	C	P	P	C	1	1	1
264	C	P	P	C	L	L	E	N	N	P	E	Y	S	S	C	I	T	*	V	I	S	L	I	F	Q	C	N	F	I	P	N	C	P	P	C	1	1	1
265	C	P	P	C	L	L	E	N	N	R	G	G	D	P	C	M	W	V	F	Q	S	L	I	F	Q	C	N	F	I	P	N	C	P	P	C	1	1	1
266	C	P	P	C	L	L	E	N	N	R	S	V	E	S	C	I	P	D	V	F	S	L	I	F	Q	C	N	F	I	P	N	C	P	P	C	1	1	1
267	C	P	P	C	L	L	E	N	N	R	S	V	E	S	C	I	P	*	V	F	S	L	I	F	Q	C	N	F	I	P	N	C	P	P	C	1	1	1
268	C	P	P	C	L	L	E	N	N	R	S	V	E	S	C	I	P	Y	V	V	S	L	I	F	Q	C	N	F	I	P	N	C	P	P	C	1	1	1
269	C	P	P	C	L	L	E	N	N	R	S	F	A	L	C	R	V	M	A	D	S	L	I	F	Q	C	N	F	I	P	N	C	P	P	C	1	1	1
270	C	P	P	C	L	L	E	N	N	R	L	L	E	M	C	E	V	H	P	H	S	L	I	F	Q	C	N	F	I	P	N	C	P	P	C	1	1	1
271	C	P	P	C	L	L	E	N	N	R	S	I	Y	T	C	L	R	S	E	Q	S	L	I	F	Q	C	N	F	I	P	T	C	P	P	C	1	1	1
272	C	P	P	C	L	L	E	N	N	R	S	G	R	S	C	R	D	G	T	K	S	L	I	F	Q	C	N	F	I	P	N	C	P	P	C	1	1	1
273	C	P	P	C	L	L	E	N	N	R	S	G	R	P	C	R	D	G	T	K	S	L	I	F	Q	C	N	F	I	P	N	C	P	P	C	1	1	1
274	C	P	P	C	L	L	E	N	N	R	S	G	R	S	C	R	D	G	T	K	S	L	I	F	Q	C	N	F	I	T	N	C	P	P	C	1	1	1
275	C	P	P	C	L	L	E	N	N	R	L	E	R	A	C	F	V	V	F	V	S	L	I	F	Q	C	N	F	I	P	N	C	P	P	C	1	1	1
276	C	P	P	C	L	L	E	N	N	L	R	A	V	G	C	F	G	*	R	S	S	L	I	F	Q	C	N	F	I	P	N	C	P	P	C	1	1	1
277	C	P	P	C	L	L	E	N	N	L	D	P	S	N	C	E	G	R	S	G	R	L	I	F	Q	C	N	F	I	P	N	C	P	P	C	1	1	1
278	C	P	P	C	L	L	E	N	N	E	N	F	R	E	C	S	D	R	F	F	S	L	I	F	Q	C	N	F	I	P	N	C	P	P	C	1	1	1
279	C	P	P	C	L	L	E	N	N	E	H	M	G	A	C	V	A	E	I	V	S	L	I	F	Q	C	N	F	I	P	N	C	P	P	C	1	1	1
280	C	P	P	C	L	L	E	N	N	E	P	L	L	F	C	E	T	R	S	W	S	L	I	F	Q	C	N	F	I	P	N	C	P	P	C	1	1	1
281	C	P	P	C	L	L	E	N	N	E	R	A	V	L	C	R	P	T	T	E	S	L	I	F	Q	C	N	F	I	P	N	C	P	P	C	1	1	1
282	C	P	P	C	L	L	E	N	N	E	A	G	R	Q	C	V	E	D	R	S	S	L	I	F	Q	C	N	F	I	P	T	C	P	P	C	1	1	1
283	C	P	P	C	L	L	E	N	N	E	G	K	R	L	C	E	T	E	M	I	S	L	I	F	Q	C	N	F	I	P	N	C	P	P	C	1	1	1
284	C	P	P	C	L	L	E	N	N	E	G	K	R	L	C	E	T	E	M	I	S	L	I	F	Q	C	N	F	I	P	N	C	P	P	C	1	1	1
285	C	P	P	C	L	L	E	N	N	E	G	K	R	L	C	E	T	E	M	I	S	L	I	F	Q	C	N	F	L	P	N	C	P	P	C	1	1	1
286	C	P	P	C	L	L	E	N	N	D	S	N	D	L	C	A	T	S	N	S	S	L	I	F	Q	C	N	F	I	P	N	C	P	P	C	1	1	1
287	C	P	P	C	L	L	E	N	N	A	T	Q	P	N	C	S	P	T	W	N	S	L	I	F	Q	C	N	F	I	P	N	C	P	P	C	1	1	1
288	C	P	P	C	L	L	E	N	N	A	E	W	F	P	C	I	R	S	N	A	S	L	I	F	Q	C	N	F	I	P	N	C	P	P	C	1	1	1
289	C	P	P	C	L	L	E	N	N	A	G	G	D	N	C	A	K	R	N	T	S	L	I	F	Q	C	N	F	I	P	N	C	P	P	C	1	1	1
290	C	P	P	C	L	L	E	N	N	A	G	G	D	N	C	A	K	R	N	T	S	L	I	L	Q	C	N	F	I	P	N	C	P	P	C	1	1	1
291	C	P	P	C	L	L	E	N	N	A	G	G	D	N	C	A	K	R	N	T	S	L	I	S	Q	C	N	F	I	P	N	C	P	P	C	1	1	1
292	C	P	P	C	L	L	E	N	N	A	G	G	D	N	C	A	K	R	N	T	S	L	I	F	Q	C	N	L	I	P	N	C	P	P	C	1	1	1
293	C	P	P	C	L	L	E	N	N	A	V	N	S	P	C	G	S	G	V	S	S	L	I	F	Q	C	N	F	I	P	N	C	P	P	C	1	1	1
294	C	P	P	C	L	L	E	N	N	A	V	V	N	M	C	V	H	A	V	K	S	L	I	F	Q	C	N	F	I	P	N	C	P	P	C	1	1	1
295	C	P	P	C	L	L	E	N	N	A	Y	S	I	K	C	D	S	Q	S	R	S	L	I	F	Q	C	N	F	I	P	N	C	P	P	C	1	1	1
296	C	P	P	C	L	L	E	N	N	A	S	S	S	H	C	T	A	M	L	R	S	L	I	F	Q	C	N	F	I	P	N	C	P	P	C	1	1	1
297	C	P	P	C	L	L	E	N	N	A	F	N	L	I	C	Q	K	E	P	E	S	L	I	F	Q	C	N	F	I	P	N	C	P	P	C	1	1	1
298	C	P	P	C	L	L	E	N	N	A	F	N	L	I	C	Q	K	E	P	E	S	P	I	F	Q	C	N	F	I	P	N	C	P	P	C	1	1	1
299	C	P	P	C	L	L	E	N	N	A	F	N	L	I	C	Q	K	E	P	E	S	L	I	L	Q	C	N	F	I	P	N	C	P	P	C	1	1	1
300	C	P	P	C	L	L	E	N	N	A	F	N	L	I	C	Q	K	E	P	E	S	L	I	F	Q	C	N	F	I	P	N	C	P	P	C	1	1	1
301	C	P	P	C	L	L	E	N	N	A	F	N	L	I	C	Q	K	E	P	E	S	L	I	F	Q	C	N	V	I	P	N	C	P	P	C	1	1	1
302	C	P	P	C	L	L	E	N	N	A	F	N	L	I	C	Q	K	E	P	E	S	L	I	F	Q	C	N	F	T	P	N	C	P	P	C	1	1	1
303	C	P	P	C	L	L	E	N	N	A	F	N	L	I	C	Q	K	E	P	E	S	L	I	F	Q	C	N	F	I	P	N	C	P	P	C	1	1	1
304	C	P	P	C	L	L	E	N	N	A	F	N	L	I	C	Q	K	E	P	E	S	L	I	F	Q	C	H	F	I	P	N	C	P	P	C	1	1	1
305	C	P	P	C	L	L	E	N	N	A	F	N	L	I	C	Q	K	E	P	E	S	L	I	F	Q	C	D	F	I	P	N	C	P	P	C	1	1	1
306	C	P	P	C	L	L	E	N	N	A	F	N	L	I	C	Q	T	E	P	E	S	L	I	F	Q	C	N	F	I	P	N	C	P	P	C	1	1	1
307	C	P	P	C	L	L	E	N	N	A	F	S	S	H	C	T	A	M	L	R	S	L	I	F	Q	C	N	F	I	P	N	C	P	P	C	1	1	1
308	C	P	P	C	L	L	E	N	N	A	F	S	L	I	C	Q	K	E	P	E	S	L	I	F	Q	C	N	F	I	P	N	C	P	P	C	1	1	1
309	C	P	P	C	L	L	E	N	N	A	F	S	S	H	C	T	A	R	L	R	S	L	I	F	Q	C	N	F	I	P	N	C	P	P	C	1	1	1
310	C	P	P	C	L	L	E	N	N	A	F	S	S	H	C	T	A	M	P	R	S	L	I	F	Q	C	N	F	I	P	N	C	P	P	C	1	1	1
311	C	P	P	C	L	L	E	N	N	A	F	S	S	H	C	T	A	M	L	R	S	L	I	F	Q	C	N	F	I	P	N	C	P	P	C	1	1	1
312	C	P	P	C	L	L	E	N	N	A	F	S	S	H	C	T	A	M	L	R	S	L	I	F	Q	C	N	F	I	P	T	C	P	P	C	1	1	1
313	C	P	P	C	L	L	E	N	N	A	F	S	S	H	C	T	A	L	L	R	S	L	I	F	Q	C	N	F	I	P	N	C	P	P	C	1	1	1
314	C	P	P	C	L	L	E	N	N	A	S	A	R	P	C	G	S	E	P	G	S	L	I	F	Q	C	N	F	I	P	N	C	P	P	C	1	1	1
315	C	P	P	C	L	L	E	N	N	A	S	V	W	R	C	H	A	W	S	G	S	L	T	F	Q	C	N	F	I	P	N	C	P	P	C	1	1	1
316	C	P	P	C	L	L	E	N	N	A	W	R	V	A	C	P	L	T	W	N	S	L	I	F	Q	C	N	F	I	P	N	C	P	P	C	1	1	1
317	C	P	P	C	L	L	E	N	N	A	F	N	L	I	C	Q	K	E	P	E	S	L	I	F	Q	C	N	F	I	P	N	C	P	P	C	1	1	1
318	C	P	P	C	L	L	E	N	N	G	T	W	M	M	C	Y	Q	A	N	A	S	L	I	F	Q	C	N	F	I	P	N	C	P	P	C	1	1	1
319	C	P	P	C	L	L	E	N	N	G	T	F	R	G	C	I	R	V	G	S	S	L	I	F	Q	C	N	F	I	P	N	C	P	P	C	1	1	1
320	C	P	P	C	L	L	E	N	N	G	R	G	W	F	C	V	R	A	D	I	S	L	I	F	Q	C	N	F	I	P	N	C	P	P	C	1	1	1
321	C	P	P	C	L	L	E	N	N	G	S	F	V	A	C	P	P	V	G	W	S	L	I	F	Q	C	N	F	I	P	N	C	P	P	C	1	1	1
322	C	P	P	C	L	L	E	N	N	G	L	P	N	R	C	G	A	P	D	S	S	L	I	F	Q	C	N	F	I	P	N	C	P	P	C	1	1	1
323	C	P	P	C	L	L	E	N	N	G	L	P	N	R	C	G	A	P	D	S	S	L	I	F	Q	C	N	F	I	P	N	C	P	P	C	1	1	1
324	C	P	P	C	L	L	E	N	N	G	L	P	N	R	C	G	A	P	D	S	S	L	I	F	Q	C	N	F	I	P	N	C	P	P	C	1	1	1
325	C	P	P	C	L	L	E	N	N	G	L	P	N	R	C	G	A	P	D	S	S	L	I	F	Q	C	N	F	I	P	N	C	P	P	C	1	1	1
326	C	P	P	C	L	L	E	N	N	G	L	P	N	R	C	G	A	P	E	S	S	L	I	F	Q	C	N	F	I	P	N	C	P	P	C	1	1	1
327	C	P	P	C	L	L	E	N	N	G	L	P	N	R	C	G	A	P	D	S	S	L	I	F	K	C	N	F	I	P	N	C	P	P	C	1	1	1
328	C	P	P	C	L	L	E	N	N	G	L	P	N	R	C	G	A	P	D	S	S	L	F	F	Q	C	N	F	I	P	N	C	P	P	C	1	1	1
329	C	P	P	C	L	L	E	N	N	G	L	P	N	R	C	G	A	P	D	S	G	L	I	F	Q	C	N	F	I	P	N	C	P	P	C	1	1	1
330	C	P	P	C	L	L	E	N	N	G	L	P	T	R	C	G	A	P	D	S	S	L	I	F	Q	C	N	F	I	P	N	C	P	P	C	1	1	1
331	C	P	P	C	L	L	E	N	N	G	V	L	P	Q	C	N	F	S	G	I	S	L	I	F	Q	C	N	F	I	P	N	C	P	P	C	1	1	1
332	C	P	P	C	L	L	E	N	N	G	F	N	A	R	C	M	P	T	S	D	S	L	I	F	Q	C	N	F	I	P	N	C	P	P	C	1	1	1
333	C	P	P	C	L	L	E	N	N	G	F	N	V	R	C	M	P	T	S	D	S	L	I	F	Q	C	N	F	I	P	N	C	P	P	C	1	1	1
334	C	P	P	C	L	L	E	N	N	G	F	N	V	R	C	M	P	T	S	D	S	L	I	F	Q	C	N	F	I	P	N	C	P	P	C	1	1	1
335	C	P	P	C	L	L	E	N	N	G	F	N	V	R	C	M	P	T	S	D	S	L	I	F	Q	C	N	F	I	P	T	C	P	P	C	1	1	1
336	C	P	P	C	L	L	E	N	N	G	F	Y	R	W	C	Q	E	R	Y	V	S	L	I	F	Q	C	N	F	I	P	N	C	P	P	C	1	1	1
337	C	P	P	C	L	L	E	N	N	G	T	W	M	M	C	Y	Q	A	N	A	S	L	I	F	Q	C	N	F	I	P	N	C	P	P	C	1	1	1
338	C	P	P	C	L	L	E	N	N	G	T	W	M	M	C	Y	Q	A	N	A	S	L	I	F	Q	C	N	F	I	P	T	C	P	P	C	1	1	1
339	C	P	P	C	L	L	E	N	N	G	T	W	M	M	C	Y	Q	A	N	A	S	L	I	F	*	C	N	F	I	P	N	C	P	P	C	1	1	1
340	C	P	P	C	L	L	E	N	N	G	M	R	E	Y	C	T	G	*	V	K	S	L	I	F	Q	C	N	F	I	P	N	C	P	P	C	1	1	1
341	C	P	P	C	L	L	E	N	N	G	L	K	F	V	C	T	L	E	R	E	S	L	I	F	Q	C	N	F	I	P	N	C	P	P	C	1	1	1
342	C	P	P	C	L	L	E	N	N	G	L	K	F	V	C	T	L	E	R	D	I	L	I	F	Q	C	N	F	I	P	N	C	P	P	C	1	1	1
343	C	P	P	C	L	L	E	N	N	G	L	K	F	V	C	T	L	E	R	D	S	L	I	F	Q	C	N	F	I	P	N	C	P	P	C	1	1	1
344	C	P	P	C	L	L	E	N	N	G	L	T	F	V	C	T	L	E	R	D	S	L	I	F	Q	C	N	F	I	P	N	C	P	P	C	1	1	1
345	C	P	P	C	L	L	E	N	N	G	L	M	F	V	C	T	L	E	R	D	S	L	I	F	Q	C	N	F	I	P	N	C	P	P	C	1	1	1
346	C	P	P	C	L	L	E	N	N	V	R	G	L	L	C	H	W	N	V	S	S	L	I	F	Q	C	N	F	I	P	N	C	P	P	C	1	1	1
347	C	P	P	C	L	L	E	N	N	V	R	G	L	L	C	H	W	T	V	S	S	L	I	F	Q	C	N	F	I	P	N	C	P	P	C	1	1	1
348	C	P	P	C	L	L	E	N	N	V	L	R	G	D	C	I	V	K	V	S	S	L	I	F	Q	C	N	F	I	P	N	C	P	P	C	1	1	1
349	C	P	P	C	L	L	E	N	N	V	L	R	G	D	C	I	V	N	V	A	S	L	I	F	Q	C	N	F	I	P	N	C	P	P	C	1	1	1
350	C	P	P	C	L	L	E	N	N	V	L	R	G	D	C	I	V	N	V	S	S	L	I	F	Q	C	N	F	I	P	N	C	P	P	C	1	1	1
351	C	P	P	C	L	L	E	N	N	V	F	S	M	E	C	G	V	N	R	P	S	P	I	F	Q	C	N	F	I	P	N	C	P	P	C	1	1	1
352	C	P	P	C	L	L	E	N	N	*	P	P	L	L	C	L	P	P	P	P	R	L	I	F	Q	C	N	F	I	P	N	C	P	P	C	1	1	1
353	C	P	P	C	L	L	E	N	N	Y	T	T	F	S	C	T	K	I	Q	D	S	L	I	F	Q	C	N	F	I	P	N	C	P	P	C	1	1	1
354	C	P	P	C	L	L	E	N	N	Y	T	G	T	S	C	L	F	L	G	V	N	L	I	F	Q	C	N	F	I	P	N	C	P	P	C	1	1	1
355	C	P	P	C	L	L	E	N	N	Y	V	P	L	F	C	N	L	N	L	S	S	L	I	F	Q	C	N	F	I	P	N	C	P	P	C	1	1	1
356	C	P	P	C	L	L	E	N	N	Y	S	T	G	R	C	H	R	I	Q	R	S	L	I	F	Q	C	N	F	I	P	N	C	P	P	C	1	1	1
357	C	P	P	C	L	L	E	N	N	Y	F	F	L	D	C	F	F	S	N	Y	S	L	I	F	Q	C	N	F	I	P	N	C	P	P	C	1	1	1
358	C	P	P	C	L	L	E	N	N	Y	F	F	L	D	C	F	F	S	N	Y	S	L	I	F	Q	C	N	F	I	P	N	C	P	P	C	1	1	1
359	C	P	P	C	L	L	E	N	N	Y	F	F	L	D	C	F	F	S	K	Y	S	L	I	F	Q	C	N	F	I	P	N	C	P	P	C	1	1	1
360	C	P	P	C	L	L	E	N	N	Y	F	F	L	D	C	F	F	S	N	Y	S	L	I	L	Q	C	N	F	I	P	N	C	P	P	C	1	1	1
361	C	P	P	C	L	L	E	N	N	Y	F	F	L	D	C	F	F	S	N	Y	S	L	I	F	Q	C	N	F	I	P	N	C	P	P	C	1	1	1
362	C	P	P	C	L	L	E	N	N	Y	F	F	L	D	C	F	F	S	N	Y	S	L	I	F	Q	C	N	F	I	P	K	C	P	P	C	1	1	1
363	C	P	P	C	L	L	E	N	N	S	T	P	M	H	C	R	I	M	T	N	S	L	I	F	Q	C	N	F	I	P	N	C	P	P	C	1	1	1
364	C	P	P	C	L	L	E	N	N	S	T	L	M	H	C	R	I	M	T	N	S	L	I	F	Q	C	N	S	I	P	N	C	P	P	C	1	1	1
365	C	P	P	C	L	L	E	N	N	S	T	L	M	H	C	R	I	M	T	N	S	L	I	F	Q	C	N	F	T	P	N	C	P	P	C	1	1	1
366	C	P	P	C	L	L	E	N	N	S	T	L	M	H	C	R	I	M	T	N	S	L	I	F	Q	C	N	F	I	P	T	C	P	P	C	1	1	1
367	C	P	P	C	L	L	E	N	N	S	T	L	M	H	C	R	I	I	T	N	S	L	I	F	Q	C	N	F	I	P	N	C	P	P	C	1	1	1
368	C	P	P	C	L	L	E	N	N	S	T	F	M	H	C	R	I	M	T	N	S	L	I	F	Q	C	N	F	I	P	N	C	P	P	C	1	1	1
369	C	P	P	C	L	L	E	N	N	S	V	P	N	Q	C	Q	V	Y	R	Y	S	L	I	F	Q	C	N	F	I	P	N	C	P	P	C	1	1	1
370	C	P	P	C	L	L	E	N	N	S	S	V	R	E	C	R	D	V	S	G	S	L	I	F	Q	C	N	F	I	P	N	C	P	P	C	1	1	1
371	C	P	P	C	L	L	E	N	N	S	H	H	Y	N	C	N	F	I	Y	Y	S	L	I	S	Q	C	N	F	I	P	N	C	P	P	C	1	1	1
372	C	P	P	C	L	L	E	N	N	S	H	P	Q	M	C	R	Q	A	G	F	S	L	I	F	Q	C	N	F	I	P	N	C	P	P	C	1	1	1
373	C	P	P	C	L	L	E	N	N	W	N	A	S	R	C	T	N	G	W	F	S	L	I	F	Q	C	N	F	I	P	N	C	P	P	C	1	1	1
374	C	P	P	C	L	L	E	N	N	W	T	H	Q	N	C	T	I	D	F	S	S	L	I	F	Q	C	N	F	I	P	N	C	P	P	C	1	1	1
375	C	P	P	C	L	L	E	N	N	W	A	R	G	P	C	I	K	A	Q	V	S	L	I	S	Q	C	N	F	I	P	N	C	P	P	C	1	1	1
376	C	P	P	C	L	L	E	N	N	L	T	L	K	I	C	P	R	S	S	E	S	L	I	F	Q	C	N	F	I	P	N	C	P	P	C	1	1	1
377	C	P	P	C	L	L	E	N	N	F	F	P	V	S	C	*	L	H	R	R	S	L	I	F	Q	C	N	F	I	P	N	C	P	P	C	1	1	1
378	C	P	P	C	L	L	E	N	N	F	F	P	V	S	C	*	L	H	R	R	S	L	I	F	Q	C	N	F	I	P	N	C	P	P	C	1	1	1
379	C	P	P	C	L	L	E	N	N	F	F	P	V	S	C	*	L	H	R	R	S	L	N	F	Q	C	N	F	I	P	N	C	P	P	C	1	1	1
380	C	P	P	C	L	L	E	N	N	F	F	P	V	S	C	*	L	H	R	R	S	L	I	F	Q	C	N	F	I	P	N	C	P	P	C	1	1	1
381	C	P	P	C	L	L	E	N	N	F	F	P	V	S	C	*	L	H	R	R	S	L	I	F	Q	C	N	F	I	Q	N	C	P	P	C	1	1	1
382	C	P	P	C	L	L	E	N	N	F	F	P	V	S	C	*	L	H	R	R	S	L	I	F	Q	C	N	F	I	P	N	C	P	P	C	1	1	1
383	C	P	P	C	L	L	E	N	N	F	F	P	V	S	C	*	L	H	R	R	S	L	I	F	Q	C	N	F	I	P	N	C	P	P	C	1	1	1
384	C	P	P	C	L	L	E	N	N	F	F	P	V	S	C	*	L	H	R	R	S	L	I	F	Q	C	N	F	I	P	T	C	P	P	C	1	1	1
385	C	P	P	C	L	L	E	N	N	F	F	P	V	S	C	*	L	H	R	R	S	L	I	F	Q	C	N	F	I	P	Y	C	P	P	C	1	1	1
386	C	P	P	C	L	L	E	N	N	F	F	P	V	S	C	*	L	H	R	R	R	L	I	F	Q	C	N	F	I	P	N	C	P	P	C	1	1	1
387	C	P	P	C	L	L	E	N	N	F	F	P	V	S	C	*	L	H	G	R	S	L	I	F	Q	C	N	F	I	P	N	C	P	P	C	1	1	1
388	C	P	P	C	L	L	E	N	T	D	T	F	F	S	C	N	R	I	F	S	S	L	I	F	Q	C	N	F	I	P	N	C	P	P	C	1	1	1
389	C	P	P	C	L	L	E	N	T	Y	F	F	L	D	C	F	F	S	N	Y	S	L	I	F	Q	C	N	F	I	P	N	C	P	P	C	1	1	1
390	C	P	P	C	L	L	E	N	S	P	I	V	L	V	C	R	R	A	K	D	S	L	I	F	Q	C	N	F	I	P	N	C	P	P	C	1	1	1
391	C	P	P	C	L	L	E	N	I	F	F	P	V	S	C	*	L	H	R	R	S	L	I	F	Q	C	N	F	I	P	N	C	P	P	C	1	1	1
392	C	P	P	C	L	L	E	N	H	G	L	K	F	V	C	T	L	E	R	D	S	L	I	F	Q	C	N	F	I	P	N	C	P	P	C	1	1	1
393	C	P	P	C	L	L	E	N	H	Y	F	F	L	D	C	F	F	S	N	Y	S	L	I	F	Q	C	N	F	I	P	N	C	P	P	C	1	1	1
394	C	P	P	C	L	L	E	T	N	K	P	H	R	E	C	M	Q	R	G	Q	S	L	I	F	Q	C	N	F	I	P	N	C	P	P	C	1	1	1
395	C	P	P	C	L	L	E	T	N	N	G	T	V	R	C	Y	D	S	S	N	S	L	I	F	Q	C	N	F	I	P	N	C	P	P	C	1	1	1
396	C	P	P	C	L	L	E	T	N	T	Y	R	L	S	C	R	S	R	I	G	S	L	I	F	Q	C	N	F	I	P	N	C	P	P	C	1	1	1
397	C	P	P	C	L	L	E	T	N	S	S	G	V	W	C	R	R	I	R	P	S	L	I	F	Q	C	N	F	I	P	N	C	P	P	C	1	1	1
398	C	P	P	C	L	L	E	T	N	P	I	V	L	V	C	R	R	A	K	D	S	L	I	F	Q	C	N	F	I	P	N	C	P	P	C	1	1	1
399	C	P	P	C	L	L	E	T	N	E	G	K	R	L	C	E	T	E	M	I	S	L	I	F	Q	C	N	F	I	P	N	C	P	P	C	1	1	1
400	C	P	P	C	L	L	E	T	N	G	F	N	V	R	C	M	P	T	S	D	S	L	I	F	Q	C	N	F	I	P	N	C	P	P	C	1	1	1
401	C	P	P	C	L	L	E	T	N	Y	T	P	R	A	C	S	D	P	S	L	S	L	I	F	Q	C	N	F	I	P	N	C	P	P	C	1	1	1
402	C	P	P	C	L	L	E	T	N	Y	F	F	L	D	C	F	F	S	N	Y	S	L	I	F	Q	C	N	F	I	P	N	C	P	P	C	1	1	1
403	C	P	P	C	L	L	E	T	N	W	T	H	L	N	C	T	I	D	F	S	S	L	I	F	Q	C	N	F	I	P	N	C	P	P	C	1	1	1
404	C	P	P	C	L	L	E	T	N	F	F	P	V	S	C	*	L	H	R	R	S	L	I	F	Q	C	N	F	I	P	N	C	P	P	C	1	1	1
405	C	P	P	C	L	L	D	N	N	S	T	L	M	H	C	R	I	M	T	N	S	L	I	F	Q	C	N	F	I	P	N	C	P	P	C	1	1	1
406	C	P	P	C	L	L	V	N	N	F	F	P	V	S	C	*	L	H	R	R	S	L	I	F	Q	C	N	F	I	P	N	C	P	P	C	1	1	1
