# Supplementary material for: Selection and evolution of disulfide-rich peptides via cellular protein quality control
Source: Chem Sci. 2023 Mar 15;14(13):3668–75. doi: 10.1039/d2sc05343h (PMC10055976; doi:10.1039/d2sc05343h)
Supplement: SC-014-D2SC05343H-s004 [file SC-014-D2SC05343H-s004.xlsx]

## Sheet: Library-2 S1-P9 (terminator)
Number	Sequences																																			Abundance
																																				Input	P9	Normalization
1	C	P	P	C	R	F	T	L	S	D	Q	Y	L	A	C	V	P	E	A	*	P	I	R	A	M	C	N	D	S	V	P	C	P	P	C	1	3	3
2	C	P	P	C	R	F	T	L	S	E	I	L	P	L	C	R	R	*	A	R	P	I	R	A	M	C	N	D	S	V	P	C	P	P	C	1	2	2
3	C	P	P	C	R	F	T	L	S	V	*	*	S	L	C	L	S	E	R	I	P	I	R	A	M	C	N	D	S	V	P	C	P	P	C	1	2	2
4	C	P	P	C	R	F	T	L	S	T	E	*	E	S	C	P	P	S	P	S	P	I	R	A	M	C	N	D	S	V	P	C	P	P	C	1	1	1
5	C	P	P	C	R	F	T	L	S	T	T	W	Q	*	C	E	T	S	T	S	P	I	R	A	M	C	N	D	S	V	P	C	P	P	C	1	1	1
6	C	P	P	C	R	F	T	L	S	T	H	Y	V	R	C	L	L	A	E	*	P	I	R	A	M	C	N	D	S	V	P	C	P	P	C	1	1	1
7	C	P	P	C	R	F	T	L	S	R	M	M	V	M	C	S	D	R	N	*	P	I	R	A	M	C	N	D	S	V	P	C	P	P	C	1	1	1

## Sheet: Library-2 S2-P9 (terminator)
Number	Sequences																																			Abundance
																																				Input	P9	Normalization
1	C	P	P	C	D	L	L	K	L	T	G	V	A	D	C	R	Q	F	P	*	T	S	I	I	T	C	Y	S	N	H	T	C	P	P	C	1	382	382
2	C	P	P	C	D	L	L	K	L	R	I	K	G	V	C	T	G	*	E	L	T	S	I	I	T	C	Y	S	N	H	T	C	P	P	C	1	7	7
3	C	P	P	C	D	L	L	K	L	*	H	S	Q	L	C	S	G	T	*	E	T	S	I	I	T	C	Y	S	N	H	T	C	P	P	C	1	7	7
4	C	P	P	C	D	L	L	K	L	L	P	T	K	L	C	N	R	G	H	*	T	S	I	I	T	C	Y	S	N	H	T	C	P	P	C	1	5	5
5	C	P	P	C	D	L	L	K	L	*	Y	N	S	E	C	T	F	S	P	Q	T	S	I	I	T	C	Y	S	N	H	T	C	P	P	C	1	3	3
6	C	P	P	C	D	L	L	K	L	T	G	V	A	D	C	R	Q	F	P	*	T	S	I	I	T	C	Y	S	N	H	T	C	P	P	C	1	2	2
7	C	P	P	C	D	L	L	K	L	T	G	V	A	D	C	R	Q	F	P	*	T	S	I	I	T	C	Y	S	N	H	T	C	P	P	C	1	2	2
8	C	P	P	C	D	L	L	K	L	G	S	R	R	Y	C	P	V	G	*	R	T	S	I	I	T	C	Y	S	N	H	T	C	P	P	C	1	2	2
9	C	P	P	C	D	L	L	K	L	V	*	F	R	S	C	H	V	T	S	P	T	S	I	I	T	C	Y	S	N	H	T	C	P	P	C	1	2	2
10	C	P	P	C	D	L	L	K	L	T	G	V	A	D	C	R	Q	F	P	*	T	S	I	I	T	C	Y	S	N	H	T	C	P	P	C	1	1	1
11	C	P	P	C	D	L	L	K	L	T	M	P	P	*	C	V	R	R	T	R	P	S	I	I	T	C	Y	S	N	H	T	C	P	P	C	1	1	1
12	C	P	P	C	D	L	L	K	L	T	G	V	A	D	C	R	Q	F	P	*	T	S	I	I	T	C	Y	S	N	H	T	C	P	P	C	1	1	1
13	C	P	P	C	D	L	L	K	L	T	G	V	A	D	C	R	Q	F	P	*	T	S	I	I	T	C	Y	S	N	H	T	C	P	P	C	1	1	1
14	C	P	P	C	D	L	L	K	L	T	G	V	A	D	C	R	Q	F	P	*	T	S	S	I	T	C	Y	S	N	H	T	C	P	P	C	1	1	1
15	C	P	P	C	D	L	L	K	L	T	G	V	A	D	C	R	Q	F	P	*	T	S	I	I	T	C	Y	S	H	H	T	C	P	P	C	1	1	1
16	C	P	P	C	D	L	L	K	L	T	G	V	A	D	C	R	Q	F	P	*	T	S	L	I	T	C	Y	S	N	H	T	C	P	P	C	1	1	1
17	C	P	P	C	D	L	L	K	L	T	G	V	A	D	C	R	Q	F	P	*	S	S	I	I	T	C	Y	S	N	H	T	C	P	P	C	1	1	1
18	C	P	P	C	D	L	L	K	L	T	F	A	S	P	C	M	*	F	G	L	T	S	I	I	T	C	Y	S	N	H	T	C	P	P	C	1	1	1
19	C	P	P	C	D	L	L	K	L	S	V	R	W	Y	C	K	S	E	*	L	T	S	I	I	T	C	Y	S	N	H	T	C	P	P	C	1	1	1
20	C	P	P	C	D	L	L	K	L	M	N	G	D	*	C	R	G	T	R	R	T	S	I	I	T	C	Y	S	N	H	T	C	P	P	C	1	1	1
21	C	P	P	C	D	L	L	K	L	R	P	V	*	K	C	I	R	K	P	R	T	S	I	I	T	C	Y	S	N	H	T	C	P	P	C	1	1	1
22	C	P	P	C	D	L	L	K	L	L	R	G	S	P	C	S	H	P	G	D	T	S	I	I	T	C	*	S	N	H	T	C	P	P	C	1	1	1
23	C	P	P	C	D	L	L	K	L	L	P	T	*	L	C	N	R	G	H	E	T	S	I	I	T	C	Y	S	N	H	T	C	P	P	C	1	1	1
24	C	P	P	C	D	L	L	K	L	A	G	V	A	D	C	R	Q	F	P	*	T	S	I	I	T	C	Y	S	N	H	T	C	P	P	C	1	1	1
25	C	P	P	C	D	L	L	K	L	G	N	*	Y	V	C	L	E	Q	P	D	T	S	I	I	T	C	Y	S	N	H	T	C	P	P	C	1	1	1
26	C	P	P	C	D	L	L	K	L	G	S	R	R	Y	C	P	V	G	*	R	P	S	I	I	T	C	Y	S	N	H	T	C	P	P	C	1	1	1
27	C	P	P	C	D	L	L	K	L	*	H	P	A	G	C	P	R	L	*	G	T	S	I	I	T	C	Y	S	N	H	T	C	P	P	C	1	1	1
28	C	P	P	C	D	L	L	K	L	*	Y	N	S	E	C	T	F	S	P	Q	T	S	I	T	T	C	Y	S	N	H	T	C	P	P	C	1	1	1
29	C	P	P	C	D	L	L	K	L	W	S	V	S	T	C	Y	*	T	W	R	T	S	I	I	T	C	Y	S	N	H	T	C	P	P	C	1	1	1
30	C	P	P	C	D	L	L	K	L	L	L	Q	T	H	C	*	L	R	G	P	T	S	I	I	T	C	Y	S	N	H	T	C	P	P	C	1	1	1
31	C	P	P	C	D	L	L	K	L	L	L	V	L	D	C	N	G	S	P	*	T	S	I	I	T	C	Y	S	N	H	T	C	P	P	C	1	1	1
32	C	P	P	C	D	L	L	*	L	I	V	R	G	I	C	E	E	E	W	R	T	S	I	I	T	C	Y	S	N	H	T	C	P	P	C	1	1	1

## Sheet: Library-2 S3-P9 (terminator)
Number	Sequences																																			Abundance
																																				Input	P9	Normalization
1	C	P	P	C	L	L	E	N	N	F	F	P	V	S	C	*	L	H	R	R	S	L	I	F	Q	C	N	F	I	P	N	C	P	P	C	1	207	207
2	C	P	P	C	L	L	E	N	N	H	S	I	T	S	C	V	A	V	*	Q	S	L	I	F	Q	C	N	F	I	P	N	C	P	P	C	1	31	31
3	C	P	P	C	L	L	E	N	N	T	R	E	*	A	C	R	V	W	F	H	S	L	I	F	Q	C	N	F	I	P	N	C	P	P	C	1	18	18
4	C	P	P	C	L	L	E	N	N	F	F	P	V	S	C	*	L	H	R	R	S	L	I	F	Q	C	N	F	I	P	N	C	P	P	C	1	3	3
5	C	P	P	C	L	L	E	N	N	F	F	P	V	S	C	*	L	H	R	R	R	L	I	F	Q	C	N	F	I	P	N	C	P	P	C	1	3	3
6	C	P	P	C	L	L	E	N	N	E	*	W	T	R	C	A	E	D	G	*	S	L	I	F	Q	C	N	F	I	P	N	C	P	P	C	1	2	2
7	C	P	P	C	L	L	E	N	N	F	F	P	V	S	C	*	L	H	R	R	S	L	I	F	Q	C	N	F	I	P	N	C	P	P	C	1	2	2
8	C	P	P	C	L	L	E	N	N	F	F	P	V	S	C	*	L	H	R	R	S	L	I	F	Q	C	N	F	I	P	N	C	P	P	C	1	2	2
9	C	P	P	C	L	L	E	N	N	F	F	P	V	S	C	*	L	H	R	R	S	L	I	F	Q	C	N	F	I	P	N	C	P	P	C	1	2	2
10	C	P	P	C	L	L	E	N	N	F	F	P	V	S	C	*	L	H	R	R	S	L	I	F	L	C	N	F	I	P	N	C	P	P	C	1	2	2
11	C	P	P	C	L	L	E	N	N	T	G	G	*	Y	C	W	S	W	T	R	S	L	I	F	Q	C	N	F	I	P	N	C	P	P	C	1	1	1
12	C	P	P	C	L	L	E	N	N	T	R	E	*	A	C	R	V	W	F	H	S	L	I	F	Q	C	N	F	I	P	T	C	P	P	C	1	1	1
13	C	P	P	C	L	L	E	N	N	Q	T	K	Y	M	C	S	*	R	V	R	S	L	I	F	Q	C	N	F	I	P	N	C	P	P	C	1	1	1
14	C	P	P	C	L	L	E	N	N	Q	L	D	V	W	C	*	F	G	V	T	S	L	I	F	Q	C	N	F	I	P	N	C	P	P	C	1	1	1
15	C	P	P	C	L	L	E	N	N	Q	W	K	S	P	C	V	L	K	*	T	S	L	I	F	Q	C	N	F	I	P	N	C	P	P	C	1	1	1
16	C	P	P	C	L	L	E	N	N	P	E	Y	S	S	C	I	T	*	V	I	S	L	I	F	Q	C	N	F	I	P	N	C	P	P	C	1	1	1
17	C	P	P	C	L	L	E	N	N	R	S	V	E	S	C	I	P	*	V	F	S	L	I	F	Q	C	N	F	I	P	N	C	P	P	C	1	1	1
18	C	P	P	C	L	L	E	N	N	L	R	A	V	G	C	F	G	*	R	S	S	L	I	F	Q	C	N	F	I	P	N	C	P	P	C	1	1	1
19	C	P	P	C	L	L	E	N	N	G	T	W	M	M	C	Y	Q	A	N	A	S	L	I	F	*	C	N	F	I	P	N	C	P	P	C	1	1	1
20	C	P	P	C	L	L	E	N	N	G	M	R	E	Y	C	T	G	*	V	K	S	L	I	F	Q	C	N	F	I	P	N	C	P	P	C	1	1	1
21	C	P	P	C	L	L	E	N	N	*	P	P	L	L	C	L	P	P	P	P	R	L	I	F	Q	C	N	F	I	P	N	C	P	P	C	1	1	1
22	C	P	P	C	L	L	E	N	N	F	F	P	V	S	C	*	L	H	R	R	S	L	I	F	Q	C	N	F	I	P	N	C	P	P	C	1	1	1
23	C	P	P	C	L	L	E	N	N	F	F	P	V	S	C	*	L	H	R	R	S	L	I	F	Q	C	N	F	I	P	N	C	P	P	C	1	1	1
24	C	P	P	C	L	L	E	N	N	F	F	P	V	S	C	*	L	H	R	R	S	L	N	F	Q	C	N	F	I	P	N	C	P	P	C	1	1	1
25	C	P	P	C	L	L	E	N	N	F	F	P	V	S	C	*	L	H	R	R	S	L	I	F	Q	C	N	F	I	P	N	C	P	P	C	1	1	1
26	C	P	P	C	L	L	E	N	N	F	F	P	V	S	C	*	L	H	R	R	S	L	I	F	Q	C	N	F	I	Q	N	C	P	P	C	1	1	1
27	C	P	P	C	L	L	E	N	N	F	F	P	V	S	C	*	L	H	R	R	S	L	I	F	Q	C	N	F	I	P	N	C	P	P	C	1	1	1
28	C	P	P	C	L	L	E	N	N	F	F	P	V	S	C	*	L	H	R	R	S	L	I	F	Q	C	N	F	I	P	N	C	P	P	C	1	1	1
29	C	P	P	C	L	L	E	N	N	F	F	P	V	S	C	*	L	H	R	R	S	L	I	F	Q	C	N	F	I	P	T	C	P	P	C	1	1	1
30	C	P	P	C	L	L	E	N	N	F	F	P	V	S	C	*	L	H	R	R	S	L	I	F	Q	C	N	F	I	P	Y	C	P	P	C	1	1	1
31	C	P	P	C	L	L	E	N	N	F	F	P	V	S	C	*	L	H	R	R	R	L	I	F	Q	C	N	F	I	P	N	C	P	P	C	1	1	1
32	C	P	P	C	L	L	E	N	N	F	F	P	V	S	C	*	L	H	G	R	S	L	I	F	Q	C	N	F	I	P	N	C	P	P	C	1	1	1
33	C	P	P	C	L	L	E	N	I	F	F	P	V	S	C	*	L	H	R	R	S	L	I	F	Q	C	N	F	I	P	N	C	P	P	C	1	1	1
34	C	P	P	C	L	L	E	T	N	F	F	P	V	S	C	*	L	H	R	R	S	L	I	F	Q	C	N	F	I	P	N	C	P	P	C	1	1	1
35	C	P	P	C	L	L	V	N	N	F	F	P	V	S	C	*	L	H	R	R	S	L	I	F	Q	C	N	F	I	P	N	C	P	P	C	1	1	1
